# Supplementary material for: Cannabidiol activates neuronal Kv7 channels
Source: eLife. 2022 Feb 18;11:e73246. doi: 10.7554/eLife.73246 (PMC8856652; doi:10.7554/eLife.73246)
Supplement: Figure 1—source data 1. [file elife-73246-fig1-data1.xlsx]

## Sheet: Assay Data
Each compound microplate was screened in duplicate.
"Avg Ratio Slope" Is the slope of the fluorescence ratio (DF/F) averaged between the two assay well readouts.
"Avg Z-score" is the Z-score calculated based on experimental well plate average and standard deviation of the ratio slopes, averaged over the two replicates.
"Avg % response": For each of the two replicates, plate average negative control ratio slope was subtracted from experimental well ratio slope, divided by the difference between plate average negative and positive control ratio slopes, and multiplied by 100. The values for the two replicates were then averaged.
Rows where Avg % Response >15 are highlighted.
Plate	Well	Library Well Type	Reagent Vendor	Vendor Reagent ID	Compound Name(s)	Compound Plate Concentration	Assay Conc (uM)	Assay Well Control Type	SMILES	Molecular Formula	Molecular Weight	Avg Ratio Slope [1591]	Avg Z-score [1591]	Avg % Response [1591]
3930	A01	Empty										0.0437	0.32	2.83
3930	A02	Empty										0.0353	-0.37	-1.46
3930	A03	Experimental	Selleck Chemicals	S1293	Cilnidipine	10 mM	33.3333		CC1=C(C(C(=C(N1)C)C(=O)OCC=CC2=CC=CC=C2)C3=CC(=CC=C3)[N+](=O)[O-])C(=O)OCCOC	C27H28N2O7	492.52	0.0355	-0.37	-1.31
3930	A04	Experimental	Selleck Chemicals	S1293	Cilnidipine	2 mM	6.66667		CC1=C(C(C(=C(N1)C)C(=O)OCC=CC2=CC=CC=C2)C3=CC(=CC=C3)[N+](=O)[O-])C(=O)OCCOC	C27H28N2O7	492.52	0.0382	-0.16	0.13
3930	A05	Experimental	Selleck Chemicals	S1662	Isradipine	10 mM	33.3333		CC1=C(C(C(=C(N1)C)C(=O)OC(C)C)C2=CC=CC3=NON=C32)C(=O)OC	C19H21N3O5	371.387	0.0158	-1.95	-11.6
3930	A06	Experimental	Selleck Chemicals	S1662	Isradipine	2 mM	6.66667		CC1=C(C(C(=C(N1)C)C(=O)OC(C)C)C2=CC=CC3=NON=C32)C(=O)OC	C19H21N3O5	371.387	0.0351	-0.37	-1.59
3930	A07	Experimental	Selleck Chemicals	S2030	Flunarizine 2HCl	10 mM	33.3333		C1CN(CCN1CC=CC2=CC=CC=C2)C(C3=CC=C(C=C3)F)C4=CC=C(C=C4)F.Cl.Cl	C26H28Cl2F2N2	477.417	0.0321	-0.61	-3.18
3930	A08	Experimental	Selleck Chemicals	S2030	Flunarizine 2HCl	2 mM	6.66667		C1CN(CCN1CC=CC2=CC=CC=C2)C(C3=CC=C(C=C3)F)C4=CC=C(C=C4)F.Cl.Cl	C26H28Cl2F2N2	477.417	0.0374	-0.22	-0.33
3930	A09	Experimental	Selleck Chemicals	S2721	Nilvadipine	10 mM	33.3333		CC1=C(C(C(=C(N1)C#N)C(=O)OC)C2=CC(=CC=C2)[N+](=O)[O-])C(=O)OC(C)C	C19H19N3O6	385.371	0.0243	-1.27	-7.18
3930	A10	Experimental	Selleck Chemicals	S2721	Nilvadipine	2 mM	6.66667		CC1=C(C(C(=C(N1)C#N)C(=O)OC)C2=CC(=CC=C2)[N+](=O)[O-])C(=O)OC(C)C	C19H19N3O6	385.371	0.039	-0.08	0.52
3930	A11	Experimental	Selleck Chemicals	S4284	Chloroprocaine HCl	10 mM	33.3333		CCN(CC)CCOC(=O)C1=C(C=C(C=C1)N)Cl.Cl	C13H20Cl2N2O2	307.216	0.0355	-0.35	-1.37
3930	A12	Experimental	Selleck Chemicals	S4284	Chloroprocaine HCl	2 mM	6.66667		CCN(CC)CCOC(=O)C1=C(C=C(C=C1)N)Cl.Cl	C13H20Cl2N2O2	307.216	0.0449	0.34	3.71
3930	A13	Experimental	Selleck Chemicals	S5028	4-Aminopyridine; Dalfampridine	10 mM	33.3333		C1=CN=CC=C1N	C5H6N2	94.115	0.034	-0.49	-2.08
3930	A14	Experimental	Selleck Chemicals	S5028	4-Aminopyridine; Dalfampridine	2 mM	6.66667		C1=CN=CC=C1N	C5H6N2	94.115	0.0356	-0.36	-1.28
3930	A15	Experimental	Selleck Chemicals	S9460	Ethotoin	10 mM	33.3333		CCN1C(=O)C(NC1=O)C2=CC=CC=C2	C11H12N2O2	204.225	0.0343	-0.47	-1.92
3930	A16	Experimental	Selleck Chemicals	S9460	Ethotoin	2 mM	6.66667		CCN1C(=O)C(NC1=O)C2=CC=CC=C2	C11H12N2O2	204.225	0.0409	0.05	1.51
3930	A17	Experimental	Selleck Chemicals	S4283	Cyclobenzaprine HCl	10 mM	33.3333		Cl.CN(C)CCC=C1C2=C(C=CC=C2)C=CC3=C1C=CC=C3	C20H22ClN	311.848	0.0144	-2.06	-12.31
3930	A18	Experimental	Selleck Chemicals	S4283	Cyclobenzaprine HCl	2 mM	6.66667		Cl.CN(C)CCC=C1C2=C(C=CC=C2)C=CC3=C1C=CC=C3	C20H22ClN	311.848	0.0284	-0.96	-5
3930	A19	Experimental	Selleck Chemicals	S1920	Haloperidol	10 mM	33.3333		OC1(CCN(CCCC(=O)C2=CC=C(F)C=C2)CC1)C3=CC=C(Cl)C=C3	C21H23ClFNO2	375.864	0.0183	-1.75	-10.27
3930	A20	Experimental	Selleck Chemicals	S1920	Haloperidol	2 mM	6.66667		OC1(CCN(CCCC(=O)C2=CC=C(F)C=C2)CC1)C3=CC=C(Cl)C=C3	C21H23ClFNO2	375.864	0.0266	-1.1	-5.95
3930	A21	Experimental	Selleck Chemicals	S4151	Penfluridol	10 mM	33.3333		OC1(CCN(CCCC(C2=CC=C(F)C=C2)C3=CC=C(F)C=C3)CC1)C4=CC(=C(Cl)C=C4)C(F)(F)F	C28H27ClF5NO	523.965	0.0291	-0.87	-4.7
3930	A22	Experimental	Selleck Chemicals	S4151	Penfluridol	2 mM	6.66667		OC1(CCN(CCCC(C2=CC=C(F)C=C2)C3=CC=C(F)C=C3)CC1)C4=CC(=C(Cl)C=C4)C(F)(F)F	C28H27ClF5NO	523.965	0.0351	-0.4	-1.55
3930	A23	Empty						Assay Positive Control				0.2444	16.62	106.93
3930	A24	Empty						Assay Positive Control				0.2256	15.04	97.32
3930	B01	Empty										0.0391	-0.09	0.55
3930	B02	Empty										0.0383	-0.17	0.19
3930	B03	Experimental	Selleck Chemicals	S1293	Cilnidipine	400 uM	1.33333		CC1=C(C(C(=C(N1)C)C(=O)OCC=CC2=CC=CC=C2)C3=CC(=CC=C3)[N+](=O)[O-])C(=O)OCCOC	C27H28N2O7	492.52	0.0418	0.12	2.01
3930	B04	Experimental	Selleck Chemicals	S1293	Cilnidipine	80 uM	0.266667		CC1=C(C(C(=C(N1)C)C(=O)OCC=CC2=CC=CC=C2)C3=CC(=CC=C3)[N+](=O)[O-])C(=O)OCCOC	C27H28N2O7	492.52	0.0414	0.11	1.76
3930	B05	Experimental	Selleck Chemicals	S1662	Isradipine	400 uM	1.33333		CC1=C(C(C(=C(N1)C)C(=O)OC(C)C)C2=CC=CC3=NON=C32)C(=O)OC	C19H21N3O5	371.387	0.041	0.08	1.53
3930	B06	Experimental	Selleck Chemicals	S1662	Isradipine	80 uM	0.266667		CC1=C(C(C(=C(N1)C)C(=O)OC(C)C)C2=CC=CC3=NON=C32)C(=O)OC	C19H21N3O5	371.387	0.0375	-0.21	-0.27
3930	B07	Experimental	Selleck Chemicals	S2030	Flunarizine 2HCl	400 uM	1.33333		C1CN(CCN1CC=CC2=CC=CC=C2)C(C3=CC=C(C=C3)F)C4=CC=C(C=C4)F.Cl.Cl	C26H28Cl2F2N2	477.417	0.0382	-0.15	0.06
3930	B08	Experimental	Selleck Chemicals	S2030	Flunarizine 2HCl	80 uM	0.266667		C1CN(CCN1CC=CC2=CC=CC=C2)C(C3=CC=C(C=C3)F)C4=CC=C(C=C4)F.Cl.Cl	C26H28Cl2F2N2	477.417	0.0438	0.28	3.09
3930	B09	Experimental	Selleck Chemicals	S2721	Nilvadipine	400 uM	1.33333		CC1=C(C(C(=C(N1)C#N)C(=O)OC)C2=CC(=CC=C2)[N+](=O)[O-])C(=O)OC(C)C	C19H19N3O6	385.371	0.0393	-0.05	0.6
3930	B10	Experimental	Selleck Chemicals	S2721	Nilvadipine	80 uM	0.266667		CC1=C(C(C(=C(N1)C#N)C(=O)OC)C2=CC(=CC=C2)[N+](=O)[O-])C(=O)OC(C)C	C19H19N3O6	385.371	0.0406	0.04	1.34
3930	B11	Experimental	Selleck Chemicals	S4284	Chloroprocaine HCl	400 uM	1.33333		CCN(CC)CCOC(=O)C1=C(C=C(C=C1)N)Cl.Cl	C13H20Cl2N2O2	307.216	0.0417	0.12	1.89
3930	B12	Experimental	Selleck Chemicals	S4284	Chloroprocaine HCl	80 uM	0.266667		CCN(CC)CCOC(=O)C1=C(C=C(C=C1)N)Cl.Cl	C13H20Cl2N2O2	307.216	0.0414	0.08	1.81
3930	B13	Experimental	Selleck Chemicals	S5028	4-Aminopyridine; Dalfampridine	400 uM	1.33333		C1=CN=CC=C1N	C5H6N2	94.115	0.0362	-0.32	-0.94
3930	B14	Experimental	Selleck Chemicals	S5028	4-Aminopyridine; Dalfampridine	80 uM	0.266667		C1=CN=CC=C1N	C5H6N2	94.115	0.0389	-0.1	0.46
3930	B15	Experimental	Selleck Chemicals	S9460	Ethotoin	400 uM	1.33333		CCN1C(=O)C(NC1=O)C2=CC=CC=C2	C11H12N2O2	204.225	0.0372	-0.24	-0.44
3930	B16	Experimental	Selleck Chemicals	S9460	Ethotoin	80 uM	0.266667		CCN1C(=O)C(NC1=O)C2=CC=CC=C2	C11H12N2O2	204.225	0.0374	-0.21	-0.34
3930	B17	Experimental	Selleck Chemicals	S4283	Cyclobenzaprine HCl	400 uM	1.33333		Cl.CN(C)CCC=C1C2=C(C=CC=C2)C=CC3=C1C=CC=C3	C20H22ClN	311.848	0.0336	-0.54	-2.24
3930	B18	Experimental	Selleck Chemicals	S4283	Cyclobenzaprine HCl	80 uM	0.266667		Cl.CN(C)CCC=C1C2=C(C=CC=C2)C=CC3=C1C=CC=C3	C20H22ClN	311.848	0.0355	-0.38	-1.28
3930	B19	Experimental	Selleck Chemicals	S1920	Haloperidol	400 uM	1.33333		OC1(CCN(CCCC(=O)C2=CC=C(F)C=C2)CC1)C3=CC=C(Cl)C=C3	C21H23ClFNO2	375.864	0.0345	-0.44	-1.85
3930	B20	Experimental	Selleck Chemicals	S1920	Haloperidol	80 uM	0.266667		OC1(CCN(CCCC(=O)C2=CC=C(F)C=C2)CC1)C3=CC=C(Cl)C=C3	C21H23ClFNO2	375.864	0.0376	-0.21	-0.22
3930	B21	Experimental	Selleck Chemicals	S4151	Penfluridol	400 uM	1.33333		OC1(CCN(CCCC(C2=CC=C(F)C=C2)C3=CC=C(F)C=C3)CC1)C4=CC(=C(Cl)C=C4)C(F)(F)F	C28H27ClF5NO	523.965	0.0339	-0.52	-2.09
3930	B22	Experimental	Selleck Chemicals	S4151	Penfluridol	80 uM	0.266667		OC1(CCN(CCCC(C2=CC=C(F)C=C2)C3=CC=C(F)C=C3)CC1)C4=CC(=C(Cl)C=C4)C(F)(F)F	C28H27ClF5NO	523.965	0.0352	-0.42	-1.43
3930	B23	Empty						Assay Positive Control				0.2225	14.8	95.66
3930	B24	Empty						Assay Positive Control				0.2275	15.29	98.02
3930	C01	Empty										0.0505	0.85	6.45
3930	C02	Empty										0.0391	-0.05	0.46
3930	C03	Experimental	Selleck Chemicals	S1334	Flupirtine maleate	10 mM	33.3333		CCOC(=O)NC1=C(N=C(C=C1)NCC2=CC=C(C=C2)F)N.C(=CC(=O)O)C(=O)O	C19H21FN4O6	420.392	0.19	12.09	79.05
3930	C04	Experimental	Selleck Chemicals	S1334	Flupirtine maleate	2 mM	6.66667		CCOC(=O)NC1=C(N=C(C=C1)NCC2=CC=C(C=C2)F)N.C(=CC(=O)O)C(=O)O	C19H21FN4O6	420.392	0.1206	6.52	42.9
3930	C05	Experimental	Selleck Chemicals	S2043	Memantine HCl	10 mM	33.3333		CC12CC3CC(C1)(CC(C3)(C2)N)C.Cl	C12H22ClN	215.763	0.0427	0.2	2.42
3930	C06	Experimental	Selleck Chemicals	S2043	Memantine HCl	2 mM	6.66667		CC12CC3CC(C1)(CC(C3)(C2)N)C.Cl	C12H22ClN	215.763	0.0429	0.25	2.5
3930	C07	Experimental	Selleck Chemicals	S2454	Bupivacaine HCl	10 mM	33.3333		CCCCN1CCCCC1C(=O)NC2=C(C=CC=C2C)C.Cl	C18H29ClN2O	324.889	0.0347	-0.43	-1.73
3930	C08	Experimental	Selleck Chemicals	S2454	Bupivacaine HCl	2 mM	6.66667		CCCCN1CCCCC1C(=O)NC2=C(C=CC=C2C)C.Cl	C18H29ClN2O	324.889	0.0439	0.31	3.02
3930	C09	Experimental	Selleck Chemicals	S2629	PNU-120596	10 mM	33.3333		CC1=CC(=NO1)NC(=O)NC2=CC(=C(C=C2OC)OC)Cl	C13H14ClN3O4	311.721	0.0373	-0.26	-0.32
3930	C10	Experimental	Selleck Chemicals	S2629	PNU-120596	2 mM	6.66667		CC1=CC(=NO1)NC(=O)NC2=CC(=C(C=C2OC)OC)Cl	C13H14ClN3O4	311.721	0.0482	0.66	5.23
3930	C11	Experimental	Selleck Chemicals	S4225	Mexiletine HCl	10 mM	33.3333		CC1=C(C(=CC=C1)C)OCC(C)N.Cl	C11H18ClNO	215.72	0.0446	0.36	3.4
3930	C12	Experimental	Selleck Chemicals	S4225	Mexiletine HCl	2 mM	6.66667		CC1=C(C(=CC=C1)C)OCC(C)N.Cl	C11H18ClNO	215.72	0.0454	0.45	3.74
3930	C13	Experimental	Selleck Chemicals	S5534	Cinchocaine; Dibucaine	10 mM	33.3333		CCCCOC1=NC2=CC=CC=C2C(=C1)C(=O)NCCN(CC)CC	C20H29N3O2	343.463	0.0319	-0.66	-3.22
3930	C14	Experimental	Selleck Chemicals	S5534	Cinchocaine; Dibucaine	2 mM	6.66667		CCCCOC1=NC2=CC=CC=C2C(=C1)C(=O)NCCN(CC)CC	C20H29N3O2	343.463	0.0335	-0.53	-2.33
3930	C15	Experimental	Selleck Chemicals	S9459	Mecamylamine Hydrochloride	10 mM	33.3333		CC1(C2CCC(C2)C1(C)NC)C.Cl	C11H22ClN	203.752	0.0357	-0.34	-1.23
3930	C16	Experimental	Selleck Chemicals	S9459	Mecamylamine Hydrochloride	2 mM	6.66667		CC1(C2CCC(C2)C1(C)NC)C.Cl	C11H22ClN	203.752	0.0439	0.31	3.06
3930	C17	Experimental	Selleck Chemicals	S5485	Desipramine Hydrochloride	10 mM	33.3333		Cl.CNCCCN1C2=C(CCC3=C1C=CC=C3)C=CC=C2	C18H23ClN2	302.842	0.0287	-0.92	-4.88
3930	C18	Experimental	Selleck Chemicals	S5485	Desipramine Hydrochloride	2 mM	6.66667		Cl.CNCCCN1C2=C(CCC3=C1C=CC=C3)C=CC=C2	C18H23ClN2	302.842	0.0401	0	1.08
3930	C19	Experimental	Selleck Chemicals	S1357	Lidocaine	10 mM	33.3333		CCN(CC)CC(=O)NC1=C(C)C=CC=C1C	C14H22N2O	234.337	0.0364	-0.31	-0.81
3930	C20	Experimental	Selleck Chemicals	S1357	Lidocaine	2 mM	6.66667		CCN(CC)CC(=O)NC1=C(C)C=CC=C1C	C14H22N2O	234.337	0.0375	-0.23	-0.23
3930	C21	Experimental	Selleck Chemicals	S8407	PF-06273340	10 mM	33.3333		CC(C)(CO)[N]1C=C(C(=O)C2=CN=CC(=C2)NC(=O)CC3=CC=C(Cl)C=N3)C4=CN=C(N)N=C14	C23H22ClN7O3	479.919	0.0344	-0.48	-1.87
3930	C22	Experimental	Selleck Chemicals	S8407	PF-06273340	2 mM	6.66667		CC(C)(CO)[N]1C=C(C(=O)C2=CN=CC(=C2)NC(=O)CC3=CC=C(Cl)C=N3)C4=CN=C(N)N=C14	C23H22ClN7O3	479.919	0.0351	-0.41	-1.51
3930	C23	Empty						Assay Positive Control				0.2276	15.22	98.32
3930	C24	Empty						Assay Positive Control				0.2298	15.47	99.29
3930	D01	Empty										0.0416	0.1	1.93
3930	D02	Empty										0.041	0.03	1.64
3930	D03	Experimental	Selleck Chemicals	S1334	Flupirtine maleate	400 uM	1.33333		CCOC(=O)NC1=C(N=C(C=C1)NCC2=CC=C(C=C2)F)N.C(=CC(=O)O)C(=O)O	C19H21FN4O6	420.392	0.0682	2.27	15.69
3930	D04	Experimental	Selleck Chemicals	S1334	Flupirtine maleate	80 uM	0.266667		CCOC(=O)NC1=C(N=C(C=C1)NCC2=CC=C(C=C2)F)N.C(=CC(=O)O)C(=O)O	C19H21FN4O6	420.392	0.0504	0.81	6.48
3930	D05	Experimental	Selleck Chemicals	S2043	Memantine HCl	400 uM	1.33333		CC12CC3CC(C1)(CC(C3)(C2)N)C.Cl	C12H22ClN	215.763	0.0395	-0.06	0.75
3930	D06	Experimental	Selleck Chemicals	S2043	Memantine HCl	80 uM	0.266667		CC12CC3CC(C1)(CC(C3)(C2)N)C.Cl	C12H22ClN	215.763	0.0389	-0.07	0.37
3930	D07	Experimental	Selleck Chemicals	S2454	Bupivacaine HCl	400 uM	1.33333		CCCCN1CCCCC1C(=O)NC2=C(C=CC=C2C)C.Cl	C18H29ClN2O	324.889	0.0396	-0.03	0.79
3930	D08	Experimental	Selleck Chemicals	S2454	Bupivacaine HCl	80 uM	0.266667		CCCCN1CCCCC1C(=O)NC2=C(C=CC=C2C)C.Cl	C18H29ClN2O	324.889	0.0402	0.03	1.02
3930	D09	Experimental	Selleck Chemicals	S2629	PNU-120596	400 uM	1.33333		CC1=CC(=NO1)NC(=O)NC2=CC(=C(C=C2OC)OC)Cl	C13H14ClN3O4	311.721	0.0372	-0.23	-0.42
3930	D10	Experimental	Selleck Chemicals	S2629	PNU-120596	80 uM	0.266667		CC1=CC(=NO1)NC(=O)NC2=CC(=C(C=C2OC)OC)Cl	C13H14ClN3O4	311.721	0.0445	0.36	3.34
3930	D11	Experimental	Selleck Chemicals	S4225	Mexiletine HCl	400 uM	1.33333		CC1=C(C(=CC=C1)C)OCC(C)N.Cl	C11H18ClNO	215.72	0.039	-0.1	0.51
3930	D12	Experimental	Selleck Chemicals	S4225	Mexiletine HCl	80 uM	0.266667		CC1=C(C(=CC=C1)C)OCC(C)N.Cl	C11H18ClNO	215.72	0.0426	0.19	2.43
3930	D13	Experimental	Selleck Chemicals	S5534	Cinchocaine; Dibucaine	400 uM	1.33333		CCCCOC1=NC2=CC=CC=C2C(=C1)C(=O)NCCN(CC)CC	C20H29N3O2	343.463	0.0465	0.5	4.43
3930	D14	Experimental	Selleck Chemicals	S5534	Cinchocaine; Dibucaine	80 uM	0.266667		CCCCOC1=NC2=CC=CC=C2C(=C1)C(=O)NCCN(CC)CC	C20H29N3O2	343.463	0.0471	0.55	4.73
3930	D15	Experimental	Selleck Chemicals	S9459	Mecamylamine Hydrochloride	400 uM	1.33333		CC1(C2CCC(C2)C1(C)NC)C.Cl	C11H22ClN	203.752	0.0442	0.34	3.2
3930	D16	Experimental	Selleck Chemicals	S9459	Mecamylamine Hydrochloride	80 uM	0.266667		CC1(C2CCC(C2)C1(C)NC)C.Cl	C11H22ClN	203.752	0.0436	0.26	2.95
3930	D17	Experimental	Selleck Chemicals	S5485	Desipramine Hydrochloride	400 uM	1.33333		Cl.CNCCCN1C2=C(CCC3=C1C=CC=C3)C=CC=C2	C18H23ClN2	302.842	0.039	-0.1	0.51
3930	D18	Experimental	Selleck Chemicals	S5485	Desipramine Hydrochloride	80 uM	0.266667		Cl.CNCCCN1C2=C(CCC3=C1C=CC=C3)C=CC=C2	C18H23ClN2	302.842	0.0415	0.09	1.82
3930	D19	Experimental	Selleck Chemicals	S1357	Lidocaine	400 uM	1.33333		CCN(CC)CC(=O)NC1=C(C)C=CC=C1C	C14H22N2O	234.337	0.0372	-0.24	-0.42
3930	D20	Experimental	Selleck Chemicals	S1357	Lidocaine	80 uM	0.266667		CCN(CC)CC(=O)NC1=C(C)C=CC=C1C	C14H22N2O	234.337	0.0371	-0.26	-0.43
3930	D21	Experimental	Selleck Chemicals	S8407	PF-06273340	400 uM	1.33333		CC(C)(CO)[N]1C=C(C(=O)C2=CN=CC(=C2)NC(=O)CC3=CC=C(Cl)C=N3)C4=CN=C(N)N=C14	C23H22ClN7O3	479.919	0.0431	0.24	2.64
3930	D22	Experimental	Selleck Chemicals	S8407	PF-06273340	80 uM	0.266667		CC(C)(CO)[N]1C=C(C(=O)C2=CN=CC(=C2)NC(=O)CC3=CC=C(Cl)C=N3)C4=CN=C(N)N=C14	C23H22ClN7O3	479.919	0.04	0.01	0.96
3930	D23	Empty						Assay Positive Control				0.2312	15.5	100.19
3930	D24	Empty						Assay Positive Control				0.2272	15.19	98.08
3930	E01	Empty										0.037	-0.23	-0.6
3930	E02	Empty										0.0396	-0.05	0.83
3930	E03	Experimental	Selleck Chemicals	S1382	Mianserin HCl	10 mM	33.3333		CN1CCN2C(C1)C3=CC=CC=C3CC4=CC=CC=C42.Cl	C18H21ClN2	300.826	0.036	-0.31	-1.13
3930	E04	Experimental	Selleck Chemicals	S1382	Mianserin HCl	2 mM	6.66667		CN1CCN2C(C1)C3=CC=CC=C3CC4=CC=CC=C42.Cl	C18H21ClN2	300.826	0.0453	0.43	3.75
3930	E05	Experimental	Selleck Chemicals	S2016	Mirtazapine	10 mM	33.3333		CN1CCN2C(C1)C3=CC=CC=C3CC4=C2N=CC=C4	C17H19N3	265.353	0.0412	0.11	1.59
3930	E06	Experimental	Selleck Chemicals	S2016	Mirtazapine	2 mM	6.66667		CN1CCN2C(C1)C3=CC=CC=C3CC4=C2N=CC=C4	C17H19N3	265.353	0.0457	0.48	3.91
3930	E07	Experimental	Selleck Chemicals	S2452	Amfebutamone (Bupropion) HCl	10 mM	33.3333		CC(C(=O)C1=CC(=CC=C1)Cl)NC(C)(C)C.Cl	C13H19Cl2NO	276.202	0.0367	-0.26	-0.71
3930	E08	Experimental	Selleck Chemicals	S2452	Amfebutamone (Bupropion) HCl	2 mM	6.66667		CC(C(=O)C1=CC(=CC=C1)Cl)NC(C)(C)C.Cl	C13H19Cl2NO	276.202	0.0445	0.37	3.29
3930	E09	Experimental	Selleck Chemicals	S3150	Articaine HCl	10 mM	33.3333		CCCNC(C)C(=O)NC1=C(SC=C1C)C(=O)OC.Cl	C13H21ClN2O3S	320.835	0.0404	0.03	1.17
3930	E10	Experimental	Selleck Chemicals	S3150	Articaine HCl	2 mM	6.66667		CCCNC(C)C(=O)NC1=C(SC=C1C)C(=O)OC.Cl	C13H21ClN2O3S	320.835	0.0474	0.59	4.9
3930	E11	Experimental	Selleck Chemicals	S4092	Pramoxine HCl	10 mM	33.3333		CCCCOC1=CC=C(C=C1)OCCCN2CCOCC2.Cl	C17H28ClNO3	329.862	0.0357	-0.35	-1.2
3930	E12	Experimental	Selleck Chemicals	S4092	Pramoxine HCl	2 mM	6.66667		CCCCOC1=CC=C(C=C1)OCCCN2CCOCC2.Cl	C17H28ClNO3	329.862	0.0389	-0.08	0.38
3930	E13	Experimental	Selleck Chemicals	S5490	Disopyramide	10 mM	33.3333		CC(C)N(CCC(C1=CC=CC=C1)(C2=CC=CC=N2)C(=O)N)C(C)C	C21H29N3O	339.474	0.0401	0	1.12
3930	E14	Experimental	Selleck Chemicals	S5490	Disopyramide	2 mM	6.66667		CC(C)N(CCC(C1=CC=CC=C1)(C2=CC=CC=N2)C(=O)N)C(C)C	C21H29N3O	339.474	0.0421	0.15	2.18
3930	E15	Experimental	Selleck Chemicals	S9509	Tiapride Hydrochloride	10 mM	33.3333		CCN(CC)CCNC(=O)C1=C(C=CC(=C1)S(=O)(=O)C)OC.Cl	C15H25ClN2O4S	364.888	0.0442	0.34	3.18
3930	E16	Experimental	Selleck Chemicals	S9509	Tiapride Hydrochloride	2 mM	6.66667		CCN(CC)CCNC(=O)C1=C(C=CC(=C1)S(=O)(=O)C)OC.Cl	C15H25ClN2O4S	364.888	0.0452	0.41	3.71
3930	E17	Experimental	Selleck Chemicals	S4038	Dibucaine HCl	10 mM	33.3333		Cl.CCCCOC1=CC(=C2C=CC=CC2=N1)C(=O)NCCN(CC)CC	C20H30ClN3O2	379.924	0.03	-0.8	-4.19
3930	E18	Experimental	Selleck Chemicals	S4038	Dibucaine HCl	2 mM	6.66667		Cl.CCCCOC1=CC(=C2C=CC=CC2=N1)C(=O)NCCN(CC)CC	C20H30ClN3O2	379.924	0.04	0.01	0.95
3930	E19	Experimental	Selleck Chemicals	S2480	Loperamide HCl	10 mM	33.3333		Cl.CN(C)C(=O)C(CCN1CCC(O)(CC1)C2=CC=C(Cl)C=C2)(C3=CC=CC=C3)C4=CC=CC=C4	C29H34Cl2N2O2	513.498	0.0172	-1.83	-10.87
3930	E20	Experimental	Selleck Chemicals	S2480	Loperamide HCl	2 mM	6.66667		Cl.CN(C)C(=O)C(CCN1CCC(O)(CC1)C2=CC=C(Cl)C=C2)(C3=CC=CC=C3)C4=CC=CC=C4	C29H34Cl2N2O2	513.498	0.0385	-0.11	0.21
3930	E21	Experimental	Selleck Chemicals	S2525	Phenytoin	10 mM	33.3333		C1=CC=C(C=C1)C2(C(=O)NC(=O)N2)C3=CC=CC=C3	C15H12N2O2	252.268	0.04	-0.02	1.05
3930	E22	Experimental	Selleck Chemicals	S2525	Phenytoin	2 mM	6.66667		C1=CC=C(C=C1)C2(C(=O)NC(=O)N2)C3=CC=CC=C3	C15H12N2O2	252.268	0.0402	0.01	1.07
3930	E23	Empty						Assay Positive Control				0.2353	15.83	102.35
3930	E24	Empty						Assay Positive Control				0.2267	15.19	97.73
3930	F01	Empty										0.0391	-0.1	0.58
3930	F02	Empty										0.0374	-0.22	-0.34
3930	F03	Experimental	Selleck Chemicals	S1382	Mianserin HCl	400 uM	1.33333		CN1CCN2C(C1)C3=CC=CC=C3CC4=CC=CC=C42.Cl	C18H21ClN2	300.826	0.0457	0.44	3.99
3930	F04	Experimental	Selleck Chemicals	S1382	Mianserin HCl	80 uM	0.266667		CN1CCN2C(C1)C3=CC=CC=C3CC4=CC=CC=C42.Cl	C18H21ClN2	300.826	0.0414	0.12	1.7
3930	F05	Experimental	Selleck Chemicals	S2016	Mirtazapine	400 uM	1.33333		CN1CCN2C(C1)C3=CC=CC=C3CC4=C2N=CC=C4	C17H19N3	265.353	0.0422	0.17	2.12
3930	F06	Experimental	Selleck Chemicals	S2016	Mirtazapine	80 uM	0.266667		CN1CCN2C(C1)C3=CC=CC=C3CC4=C2N=CC=C4	C17H19N3	265.353	0.0416	0.15	1.76
3930	F07	Experimental	Selleck Chemicals	S2452	Amfebutamone (Bupropion) HCl	400 uM	1.33333		CC(C(=O)C1=CC(=CC=C1)Cl)NC(C)(C)C.Cl	C13H19Cl2NO	276.202	0.043	0.25	2.5
3930	F08	Experimental	Selleck Chemicals	S2452	Amfebutamone (Bupropion) HCl	80 uM	0.266667		CC(C(=O)C1=CC(=CC=C1)Cl)NC(C)(C)C.Cl	C13H19Cl2NO	276.202	0.0456	0.45	3.9
3930	F09	Experimental	Selleck Chemicals	S3150	Articaine HCl	400 uM	1.33333		CCCNC(C)C(=O)NC1=C(SC=C1C)C(=O)OC.Cl	C13H21ClN2O3S	320.835	0.0349	-0.42	-1.64
3930	F10	Experimental	Selleck Chemicals	S3150	Articaine HCl	80 uM	0.266667		CCCNC(C)C(=O)NC1=C(SC=C1C)C(=O)OC.Cl	C13H21ClN2O3S	320.835	0.0441	0.31	3.15
3930	F11	Experimental	Selleck Chemicals	S4092	Pramoxine HCl	400 uM	1.33333		CCCCOC1=CC=C(C=C1)OCCCN2CCOCC2.Cl	C17H28ClNO3	329.862	0.0416	0.12	1.89
3930	F12	Experimental	Selleck Chemicals	S4092	Pramoxine HCl	80 uM	0.266667		CCCCOC1=CC=C(C=C1)OCCCN2CCOCC2.Cl	C17H28ClNO3	329.862	0.0438	0.3	3
3930	F13	Experimental	Selleck Chemicals	S5490	Disopyramide	400 uM	1.33333		CC(C)N(CCC(C1=CC=CC=C1)(C2=CC=CC=N2)C(=O)N)C(C)C	C21H29N3O	339.474	0.0324	-0.61	-2.92
3930	F14	Experimental	Selleck Chemicals	S5490	Disopyramide	80 uM	0.266667		CC(C)N(CCC(C1=CC=CC=C1)(C2=CC=CC=N2)C(=O)N)C(C)C	C21H29N3O	339.474	0.0407	0.06	1.35
3930	F15	Experimental	Selleck Chemicals	S9509	Tiapride Hydrochloride	400 uM	1.33333		CCN(CC)CCNC(=O)C1=C(C=CC(=C1)S(=O)(=O)C)OC.Cl	C15H25ClN2O4S	364.888	0.0429	0.23	2.54
3930	F16	Experimental	Selleck Chemicals	S9509	Tiapride Hydrochloride	80 uM	0.266667		CCN(CC)CCNC(=O)C1=C(C=CC(=C1)S(=O)(=O)C)OC.Cl	C15H25ClN2O4S	364.888	0.045	0.37	3.65
3930	F17	Experimental	Selleck Chemicals	S4038	Dibucaine HCl	400 uM	1.33333		Cl.CCCCOC1=CC(=C2C=CC=CC2=N1)C(=O)NCCN(CC)CC	C20H30ClN3O2	379.924	0.039	-0.1	0.55
3930	F18	Experimental	Selleck Chemicals	S4038	Dibucaine HCl	80 uM	0.266667		Cl.CCCCOC1=CC(=C2C=CC=CC2=N1)C(=O)NCCN(CC)CC	C20H30ClN3O2	379.924	0.0405	0.02	1.32
3930	F19	Experimental	Selleck Chemicals	S2480	Loperamide HCl	400 uM	1.33333		Cl.CN(C)C(=O)C(CCN1CCC(O)(CC1)C2=CC=C(Cl)C=C2)(C3=CC=CC=C3)C4=CC=CC=C4	C29H34Cl2N2O2	513.498	0.0378	-0.21	-0.04
3930	F20	Experimental	Selleck Chemicals	S2480	Loperamide HCl	80 uM	0.266667		Cl.CN(C)C(=O)C(CCN1CCC(O)(CC1)C2=CC=C(Cl)C=C2)(C3=CC=CC=C3)C4=CC=CC=C4	C29H34Cl2N2O2	513.498	0.0404	0.02	1.24
3930	F21	Experimental	Selleck Chemicals	S2525	Phenytoin	400 uM	1.33333		C1=CC=C(C=C1)C2(C(=O)NC(=O)N2)C3=CC=CC=C3	C15H12N2O2	252.268	0.0391	-0.07	0.54
3930	F22	Experimental	Selleck Chemicals	S2525	Phenytoin	80 uM	0.266667		C1=CC=C(C=C1)C2(C(=O)NC(=O)N2)C3=CC=CC=C3	C15H12N2O2	252.268	0.0407	0.06	1.38
3930	F23	Empty						Assay Positive Control				0.2309	15.47	100.09
3930	F24	Empty						Assay Positive Control				0.2258	15.07	97.44
3930	G01	Empty										0.0452	0.45	3.64
3930	G02	Empty										0.0487	0.68	5.55
3930	G03	Experimental	Selleck Chemicals	S1391	Oxcarbazepine	10 mM	33.3333		C1C2=CC=CC=C2N(C3=CC=CC=C3C1=O)C(=O)N	C15H12N2O2	252.268	0.0523	0.95	7.5
3930	G04	Experimental	Selleck Chemicals	S1391	Oxcarbazepine	2 mM	6.66667		C1C2=CC=CC=C2N(C3=CC=CC=C3C1=O)C(=O)N	C15H12N2O2	252.268	0.0508	0.87	6.64
3930	G05	Experimental	Selleck Chemicals	S1748	Nisoldipine	10 mM	33.3333		CC1=C(C(C(=C(N1)C)C(=O)OCC(C)C)C2=CC=CC=C2[N+](=O)[O-])C(=O)OC	C20H24N2O6	388.414	0.0501	0.81	6.27
3930	G06	Experimental	Selleck Chemicals	S1748	Nisoldipine	2 mM	6.66667		CC1=C(C(C(=C(N1)C)C(=O)OCC(C)C)C2=CC=CC=C2[N+](=O)[O-])C(=O)OC	C20H24N2O6	388.414	0.0468	0.58	4.46
3930	G07	Experimental	Selleck Chemicals	S2080	Clevidipine Butyrate	10 mM	33.3333		CCCC(=O)OCOC(=O)C1=C(NC(=C(C1C2=C(C(=CC=C2)Cl)Cl)C(=O)OC)C)C	C21H23Cl2NO6	456.316	0.0403	0.02	1.14
3930	G08	Experimental	Selleck Chemicals	S2080	Clevidipine Butyrate	2 mM	6.66667		CCCC(=O)OCOC(=O)C1=C(NC(=C(C1C2=C(C(=CC=C2)Cl)Cl)C(=O)OC)C)C	C21H23Cl2NO6	456.316	0.0437	0.28	3
3930	G09	Experimental	Selleck Chemicals	S3053	Azelnidipine	10 mM	33.3333		CC1=C(C(C(=C(N1)N)C(=O)OC2CN(C2)C(C3=CC=CC=C3)C4=CC=CC=C4)C5=CC(=CC=C5)[N+](=O)[O-])C(=O)OC(C)C	C33H34N4O6	582.646	0.0389	-0.09	0.44
3930	G10	Experimental	Selleck Chemicals	S3053	Azelnidipine	2 mM	6.66667		CC1=C(C(C(=C(N1)N)C(=O)OC2CN(C2)C(C3=CC=CC=C3)C4=CC=CC=C4)C5=CC(=CC=C5)[N+](=O)[O-])C(=O)OC(C)C	C33H34N4O6	582.646	0.0413	0.12	1.63
3930	G11	Experimental	Selleck Chemicals	S4293	Promethazine HCl	10 mM	33.3333		CC(CN1C2=CC=CC=C2SC3=CC=CC=C31)N(C)C.Cl	C17H21ClN2S	320.88	0.0256	-1.15	-6.52
3930	G12	Experimental	Selleck Chemicals	S4293	Promethazine HCl	2 mM	6.66667		CC(CN1C2=CC=CC=C2SC3=CC=CC=C31)N(C)C.Cl	C17H21ClN2S	320.88	0.0392	-0.05	0.56
3930	G13	Experimental	Selleck Chemicals	S5392	Mepivacaine	10 mM	33.3333		CC1=C(C(=CC=C1)C)NC(=O)C2CCCCN2C	C15H22N2O	246.348	0.0357	-0.36	-1.24
3930	G14	Experimental	Selleck Chemicals	S5392	Mepivacaine	2 mM	6.66667		CC1=C(C(=CC=C1)C)NC(=O)C2CCCCN2C	C15H22N2O	246.348	0.0491	0.71	5.75
3930	G15	Experimental	Selleck Chemicals	S3183	Amitriptyline HCl	10 mM	33.3333		Cl.CN(C)CCC=C1C2=CC=CC=C2CCC3=CC=CC=C13	C20H24ClN	313.864	0.0205	-1.57	-9.16
3930	G16	Experimental	Selleck Chemicals	S3183	Amitriptyline HCl	2 mM	6.66667		Cl.CN(C)CCC=C1C2=CC=CC=C2CCC3=CC=CC=C13	C20H24ClN	313.864	0.0363	-0.3	-0.89
3930	G17	Experimental	Selleck Chemicals	S5787	Dronedarone	10 mM	33.3333		CCCCN(CCCC)CCCOC1=CC=C(C=C1)C(=O)C2=C(CCCC)OC3=C2C=C(N[S](C)(=O)=O)C=C3	C31H44N2O5S	556.756	0.0321	-0.62	-3.16
3930	G18	Experimental	Selleck Chemicals	S5787	Dronedarone	2 mM	6.66667		CCCCN(CCCC)CCCOC1=CC=C(C=C1)C(=O)C2=C(CCCC)OC3=C2C=C(N[S](C)(=O)=O)C=C3	C31H44N2O5S	556.756	0.0361	-0.32	-0.98
3930	G19	Experimental	Selleck Chemicals	S1358	Loratadine	10 mM	33.3333		CCOC(=O)N1CCC(CC1)=C2C3=C(CCC4=C2N=CC=C4)C=C(Cl)C=C3	C22H23ClN2O2	382.883	0.013	-2.16	-13.07
3930	G20	Experimental	Selleck Chemicals	S1358	Loratadine	2 mM	6.66667		CCOC(=O)N1CCC(CC1)=C2C3=C(CCC4=C2N=CC=C4)C=C(Cl)C=C3	C22H23ClN2O2	382.883	0.0283	-0.94	-5.12
3930	G21	Experimental	Selleck Chemicals	S4358	Pimozide	10 mM	33.3333		FC1=CC=C(C=C1)C(CCCN2CCC(CC2)N3C(=O)NC4=CC=CC=C34)C5=CC=C(F)C=C5	C28H29F2N3O	461.546	0.0312	-0.71	-3.55
3930	G22	Experimental	Selleck Chemicals	S4358	Pimozide	2 mM	6.66667		FC1=CC=C(C=C1)C(CCCN2CCC(CC2)N3C(=O)NC4=CC=CC=C34)C5=CC=C(F)C=C5	C28H29F2N3O	461.546	0.0315	-0.68	-3.47
3930	G23	Empty						Assay Positive Control				0.232	15.57	100.59
3930	G24	Empty						Assay Positive Control				0.2295	15.37	99.32
3930	H01	Empty										0.0369	-0.27	-0.55
3930	H02	Empty										0.0439	0.29	3.09
3930	H03	Experimental	Selleck Chemicals	S1391	Oxcarbazepine	400 uM	1.33333		C1C2=CC=CC=C2N(C3=CC=CC=C3C1=O)C(=O)N	C15H12N2O2	252.268	0.0413	0.08	1.78
3930	H04	Experimental	Selleck Chemicals	S1391	Oxcarbazepine	80 uM	0.266667		C1C2=CC=CC=C2N(C3=CC=CC=C3C1=O)C(=O)N	C15H12N2O2	252.268	0.0454	0.44	3.76
3930	H05	Experimental	Selleck Chemicals	S1748	Nisoldipine	400 uM	1.33333		CC1=C(C(C(=C(N1)C)C(=O)OCC(C)C)C2=CC=CC=C2[N+](=O)[O-])C(=O)OC	C20H24N2O6	388.414	0.0402	0.03	1.06
3930	H06	Experimental	Selleck Chemicals	S1748	Nisoldipine	80 uM	0.266667		CC1=C(C(C(=C(N1)C)C(=O)OCC(C)C)C2=CC=CC=C2[N+](=O)[O-])C(=O)OC	C20H24N2O6	388.414	0.0465	0.54	4.35
3930	H07	Experimental	Selleck Chemicals	S2080	Clevidipine Butyrate	400 uM	1.33333		CCCC(=O)OCOC(=O)C1=C(NC(=C(C1C2=C(C(=CC=C2)Cl)Cl)C(=O)OC)C)C	C21H23Cl2NO6	456.316	0.0441	0.33	3.14
3930	H08	Experimental	Selleck Chemicals	S2080	Clevidipine Butyrate	80 uM	0.266667		CCCC(=O)OCOC(=O)C1=C(NC(=C(C1C2=C(C(=CC=C2)Cl)Cl)C(=O)OC)C)C	C21H23Cl2NO6	456.316	0.0418	0.14	1.98
3930	H09	Experimental	Selleck Chemicals	S3053	Azelnidipine	400 uM	1.33333		CC1=C(C(C(=C(N1)N)C(=O)OC2CN(C2)C(C3=CC=CC=C3)C4=CC=CC=C4)C5=CC(=CC=C5)[N+](=O)[O-])C(=O)OC(C)C	C33H34N4O6	582.646	0.0439	0.29	3.12
3930	H10	Experimental	Selleck Chemicals	S3053	Azelnidipine	80 uM	0.266667		CC1=C(C(C(=C(N1)N)C(=O)OC2CN(C2)C(C3=CC=CC=C3)C4=CC=CC=C4)C5=CC(=CC=C5)[N+](=O)[O-])C(=O)OC(C)C	C33H34N4O6	582.646	0.0409	0.06	1.52
3930	H11	Experimental	Selleck Chemicals	S4293	Promethazine HCl	400 uM	1.33333		CC(CN1C2=CC=CC=C2SC3=CC=CC=C31)N(C)C.Cl	C17H21ClN2S	320.88	0.0407	0.02	1.47
3930	H12	Experimental	Selleck Chemicals	S4293	Promethazine HCl	80 uM	0.266667		CC(CN1C2=CC=CC=C2SC3=CC=CC=C31)N(C)C.Cl	C17H21ClN2S	320.88	0.0447	0.37	3.42
3930	H13	Experimental	Selleck Chemicals	S5392	Mepivacaine	400 uM	1.33333		CC1=C(C(=CC=C1)C)NC(=O)C2CCCCN2C	C15H22N2O	246.348	0.0419	0.15	2.01
3930	H14	Experimental	Selleck Chemicals	S5392	Mepivacaine	80 uM	0.266667		CC1=C(C(=CC=C1)C)NC(=O)C2CCCCN2C	C15H22N2O	246.348	0.0403	0.01	1.21
3930	H15	Experimental	Selleck Chemicals	S3183	Amitriptyline HCl	400 uM	1.33333		Cl.CN(C)CCC=C1C2=CC=CC=C2CCC3=CC=CC=C13	C20H24ClN	313.864	0.0427	0.22	2.44
3930	H16	Experimental	Selleck Chemicals	S3183	Amitriptyline HCl	80 uM	0.266667		Cl.CN(C)CCC=C1C2=CC=CC=C2CCC3=CC=CC=C13	C20H24ClN	313.864	0.0463	0.48	4.33
3930	H17	Experimental	Selleck Chemicals	S5787	Dronedarone	400 uM	1.33333		CCCCN(CCCC)CCCOC1=CC=C(C=C1)C(=O)C2=C(CCCC)OC3=C2C=C(N[S](C)(=O)=O)C=C3	C31H44N2O5S	556.756	0.047	0.56	4.66
3930	H18	Experimental	Selleck Chemicals	S5787	Dronedarone	80 uM	0.266667		CCCCN(CCCC)CCCOC1=CC=C(C=C1)C(=O)C2=C(CCCC)OC3=C2C=C(N[S](C)(=O)=O)C=C3	C31H44N2O5S	556.756	0.0409	0.05	1.49
3930	H19	Experimental	Selleck Chemicals	S1358	Loratadine	400 uM	1.33333		CCOC(=O)N1CCC(CC1)=C2C3=C(CCC4=C2N=CC=C4)C=C(Cl)C=C3	C22H23ClN2O2	382.883	0.0396	-0.04	0.83
3930	H20	Experimental	Selleck Chemicals	S1358	Loratadine	80 uM	0.266667		CCOC(=O)N1CCC(CC1)=C2C3=C(CCC4=C2N=CC=C4)C=C(Cl)C=C3	C22H23ClN2O2	382.883	0.0418	0.11	2
3930	H21	Experimental	Selleck Chemicals	S4358	Pimozide	400 uM	1.33333		FC1=CC=C(C=C1)C(CCCN2CCC(CC2)N3C(=O)NC4=CC=CC=C34)C5=CC=C(F)C=C5	C28H29F2N3O	461.546	0.042	0.17	2.03
3930	H22	Experimental	Selleck Chemicals	S4358	Pimozide	80 uM	0.266667		FC1=CC=C(C=C1)C(CCCN2CCC(CC2)N3C(=O)NC4=CC=CC=C34)C5=CC=C(F)C=C5	C28H29F2N3O	461.546	0.0425	0.18	2.34
3930	H23	Empty						Assay Positive Control				0.239	16.09	104.39
3930	H24	Empty						Assay Positive Control				0.239	16.13	104.29
3930	I01	Empty										0.0439	0.34	2.96
3930	I02	Empty										0.0445	0.37	3.3
3930	I03	Experimental	Selleck Chemicals	S1256	Rufinamide	10 mM	33.3333		C1=CC(=C(C(=C1)F)CN2C=C(N=N2)C(=O)N)F	C10H8F2N4O	238.194	0.0458	0.48	4.01
3930	I04	Experimental	Selleck Chemicals	S1256	Rufinamide	2 mM	6.66667		C1=CC(=C(C(=C1)F)CN2C=C(N=N2)C(=O)N)F	C10H8F2N4O	238.194	0.0465	0.53	4.37
3930	I05	Experimental	Selleck Chemicals	S1619	Prilocaine	10 mM	33.3333		CCCNC(C)C(=O)NC1=CC=CC=C1C	C13H20N2O	220.311	0.0209	-1.44	-9.22
3930	I06	Experimental	Selleck Chemicals	S1619	Prilocaine	2 mM	6.66667		CCCNC(C)C(=O)NC1=CC=CC=C1C	C13H20N2O	220.311	0.0415	0.12	1.8
3930	I07	Experimental	Selleck Chemicals	S2118	Ibutilide Fumarate	10 mM	33.3333		CCCCCCCN(CC)CCCC(C1=CC=C(C=C1)NS(=O)(=O)C)O.CCCCCCCN(CC)CCCC(C1=CC=C(C=C1)NS(=O)(=O)C)O.C(=CC(=O)O)C(=O)O	C44H76N4O10S2	885.225	0.0398	-0.03	0.9
3930	I08	Experimental	Selleck Chemicals	S2118	Ibutilide Fumarate	2 mM	6.66667		CCCCCCCN(CC)CCCC(C1=CC=C(C=C1)NS(=O)(=O)C)O.CCCCCCCN(CC)CCCC(C1=CC=C(C=C1)NS(=O)(=O)C)O.C(=CC(=O)O)C(=O)O	C44H76N4O10S2	885.225	0.0477	0.61	5.04
3930	I09	Experimental	Selleck Chemicals	S3024	Lamotrigine	10 mM	33.3333		C1=CC(=C(C(=C1)Cl)Cl)C2=C(N=C(N=N2)N)N	C9H7Cl2N5	256.091	0.0522	0.99	7.3
3930	I10	Experimental	Selleck Chemicals	S3024	Lamotrigine	2 mM	6.66667		C1=CC(=C(C(=C1)Cl)Cl)C2=C(N=C(N=N2)N)N	C9H7Cl2N5	256.091	0.0437	0.33	2.86
3930	I11	Experimental	Selleck Chemicals	S4200	Tolperisone HCl	10 mM	33.3333		CC1=CC=C(C=C1)C(=O)C(C)CN2CCCCC2.Cl	C16H24ClNO	281.821	0.0446	0.37	3.39
3930	I12	Experimental	Selleck Chemicals	S4200	Tolperisone HCl	2 mM	6.66667		CC1=CC=C(C=C1)C(=O)C(C)CN2CCCCC2.Cl	C16H24ClNO	281.821	0.0392	-0.08	0.63
3930	I13	Experimental	Selleck Chemicals	S5398	Nefazodone hydrochloride	10 mM	33.3333		CCC1=NN(C(=O)N1CCOC2=CC=CC=C2)CCCN3CCN(CC3)C4=CC(=CC=C4)Cl.Cl	C25H33Cl2N5O2	506.468	0.006	-2.75	-16.66
3930	I14	Experimental	Selleck Chemicals	S5398	Nefazodone hydrochloride	2 mM	6.66667		CCC1=NN(C(=O)N1CCOC2=CC=CC=C2)CCCN3CCN(CC3)C4=CC(=CC=C4)Cl.Cl	C25H33Cl2N5O2	506.468	0.0335	-0.51	-2.45
3930	I15	Experimental	Selleck Chemicals	S1905	Amlodipine	10 mM	33.3333		CCOC(=O)C1=C(NC(=C(C1C2=CC=CC=C2Cl)C(=O)OC)C)COCCN	C20H25ClN2O5	408.876	0.0253	-1.19	-6.63
3930	I16	Experimental	Selleck Chemicals	S1905	Amlodipine	2 mM	6.66667		CCOC(=O)C1=C(NC(=C(C1C2=CC=CC=C2Cl)C(=O)OC)C)COCCN	C20H25ClN2O5	408.876	0.0408	0.06	1.43
3930	I17	Experimental	Selleck Chemicals	S4064	Escitalopram Oxalate	10 mM	33.3333		CN(C)CCCC1(OCC2=CC(=CC=C12)C#N)C3=CC=C(F)C=C3.OC(=O)C(O)=O	C22H23FN2O5	414.427	0.0371	-0.24	-0.48
3930	I18	Experimental	Selleck Chemicals	S4064	Escitalopram Oxalate	2 mM	6.66667		CN(C)CCCC1(OCC2=CC(=CC=C12)C#N)C3=CC=C(F)C=C3.OC(=O)C(O)=O	C22H23FN2O5	414.427	0.0387	-0.11	0.33
3930	I19	Experimental	Selleck Chemicals	S4181	Nicardipine HCl	10 mM	33.3333		Cl.COC(=O)C1=C(C)NC(=C(C1C2=CC(=CC=C2)[N+]([O-])=O)C(=O)OCCN(C)CC3=CC=CC=C3)C	C26H30ClN3O6	515.986	0.0226	-1.39	-8.11
3930	I20	Experimental	Selleck Chemicals	S4181	Nicardipine HCl	2 mM	6.66667		Cl.COC(=O)C1=C(C)NC(=C(C1C2=CC(=CC=C2)[N+]([O-])=O)C(=O)OCCN(C)CC3=CC=CC=C3)C	C26H30ClN3O6	515.986	0.0324	-0.62	-2.94
3930	I21	Experimental	Selleck Chemicals	S4381	Proadifen HCl	10 mM	33.3333		Cl.CCCC(C(=O)OCCN(CC)CC)(C1=CC=CC=C1)C2=CC=CC=C2	C23H32ClNO2	389.959	0.0187	-1.72	-10.08
3930	I22	Experimental	Selleck Chemicals	S4381	Proadifen HCl	2 mM	6.66667		Cl.CCCC(C(=O)OCCN(CC)CC)(C1=CC=CC=C1)C2=CC=CC=C2	C23H32ClNO2	389.959	0.034	-0.48	-2.1
3930	I23	Empty						Assay Negative Control				0.0387	-0.11	0.36
3930	I24	Empty						Assay Negative Control				0.0345	-0.45	-1.86
3930	J01	Empty										0.0415	0.09	1.86
3930	J02	Empty										0.0448	0.36	3.53
3930	J03	Experimental	Selleck Chemicals	S1256	Rufinamide	400 uM	1.33333		C1=CC(=C(C(=C1)F)CN2C=C(N=N2)C(=O)N)F	C10H8F2N4O	238.194	0.0451	0.39	3.72
3930	J04	Experimental	Selleck Chemicals	S1256	Rufinamide	80 uM	0.266667		C1=CC(=C(C(=C1)F)CN2C=C(N=N2)C(=O)N)F	C10H8F2N4O	238.194	0.0427	0.21	2.43
3930	J05	Experimental	Selleck Chemicals	S1619	Prilocaine	400 uM	1.33333		CCCNC(C)C(=O)NC1=CC=CC=C1C	C13H20N2O	220.311	0.0483	0.66	5.38
3930	J06	Experimental	Selleck Chemicals	S1619	Prilocaine	80 uM	0.266667		CCCNC(C)C(=O)NC1=CC=CC=C1C	C13H20N2O	220.311	0.046	0.46	4.15
3930	J07	Experimental	Selleck Chemicals	S2118	Ibutilide Fumarate	400 uM	1.33333		CCCCCCCN(CC)CCCC(C1=CC=C(C=C1)NS(=O)(=O)C)O.CCCCCCCN(CC)CCCC(C1=CC=C(C=C1)NS(=O)(=O)C)O.C(=CC(=O)O)C(=O)O	C44H76N4O10S2	885.225	0.0451	0.39	3.71
3930	J08	Experimental	Selleck Chemicals	S2118	Ibutilide Fumarate	80 uM	0.266667		CCCCCCCN(CC)CCCC(C1=CC=C(C=C1)NS(=O)(=O)C)O.CCCCCCCN(CC)CCCC(C1=CC=C(C=C1)NS(=O)(=O)C)O.C(=CC(=O)O)C(=O)O	C44H76N4O10S2	885.225	0.0492	0.71	5.87
3930	J09	Empty										0.0405	0.02	1.3
3930	J10	Empty										0.0459	0.45	4.14
3930	J11	Experimental	Selleck Chemicals	S4200	Tolperisone HCl	400 uM	1.33333		CC1=CC=C(C=C1)C(=O)C(C)CN2CCCCC2.Cl	C16H24ClNO	281.821	0.046	0.46	4.15
3930	J12	Experimental	Selleck Chemicals	S4200	Tolperisone HCl	80 uM	0.266667		CC1=CC=C(C=C1)C(=O)C(C)CN2CCCCC2.Cl	C16H24ClNO	281.821	0.0401	-0.01	1.09
3930	J13	Experimental	Selleck Chemicals	S5398	Nefazodone hydrochloride	400 uM	1.33333		CCC1=NN(C(=O)N1CCOC2=CC=CC=C2)CCCN3CCN(CC3)C4=CC(=CC=C4)Cl.Cl	C25H33Cl2N5O2	506.468	0.0426	0.18	2.46
3930	J14	Experimental	Selleck Chemicals	S5398	Nefazodone hydrochloride	80 uM	0.266667		CCC1=NN(C(=O)N1CCOC2=CC=CC=C2)CCCN3CCN(CC3)C4=CC(=CC=C4)Cl.Cl	C25H33Cl2N5O2	506.468	0.046	0.46	4.16
3930	J15	Experimental	Selleck Chemicals	S1905	Amlodipine	400 uM	1.33333		CCOC(=O)C1=C(NC(=C(C1C2=CC=CC=C2Cl)C(=O)OC)C)COCCN	C20H25ClN2O5	408.876	0.0413	0.09	1.76
3930	J16	Experimental	Selleck Chemicals	S1905	Amlodipine	80 uM	0.266667		CCOC(=O)C1=C(NC(=C(C1C2=CC=CC=C2Cl)C(=O)OC)C)COCCN	C20H25ClN2O5	408.876	0.0414	0.1	1.76
3930	J17	Experimental	Selleck Chemicals	S4064	Escitalopram Oxalate	400 uM	1.33333		CN(C)CCCC1(OCC2=CC(=CC=C12)C#N)C3=CC=C(F)C=C3.OC(=O)C(O)=O	C22H23FN2O5	414.427	0.0428	0.22	2.48
3930	J18	Experimental	Selleck Chemicals	S4064	Escitalopram Oxalate	80 uM	0.266667		CN(C)CCCC1(OCC2=CC(=CC=C12)C#N)C3=CC=C(F)C=C3.OC(=O)C(O)=O	C22H23FN2O5	414.427	0.0463	0.49	4.31
3930	J19	Experimental	Selleck Chemicals	S4181	Nicardipine HCl	400 uM	1.33333		Cl.COC(=O)C1=C(C)NC(=C(C1C2=CC(=CC=C2)[N+]([O-])=O)C(=O)OCCN(C)CC3=CC=CC=C3)C	C26H30ClN3O6	515.986	0.0417	0.11	1.96
3930	J20	Experimental	Selleck Chemicals	S4181	Nicardipine HCl	80 uM	0.266667		Cl.COC(=O)C1=C(C)NC(=C(C1C2=CC(=CC=C2)[N+]([O-])=O)C(=O)OCCN(C)CC3=CC=CC=C3)C	C26H30ClN3O6	515.986	0.0376	-0.23	-0.16
3930	J21	Experimental	Selleck Chemicals	S4381	Proadifen HCl	400 uM	1.33333		Cl.CCCC(C(=O)OCCN(CC)CC)(C1=CC=CC=C1)C2=CC=CC=C2	C23H32ClNO2	389.959	0.0419	0.14	2.02
3930	J22	Experimental	Selleck Chemicals	S4381	Proadifen HCl	80 uM	0.266667		Cl.CCCC(C(=O)OCCN(CC)CC)(C1=CC=CC=C1)C2=CC=CC=C2	C23H32ClNO2	389.959	0.0365	-0.29	-0.84
3930	J23	Empty						Assay Negative Control				0.0411	0.09	1.58
3930	J24	Empty						Assay Negative Control				0.0378	-0.2	-0.09
3930	K01	Empty										0.0482	0.67	5.25
3930	K02	Empty										0.0404	0.04	1.19
3930	K03	Experimental	Selleck Chemicals	S1903	Diclofenac Sodium	10 mM	33.3333		C1=CC=C(C(=C1)CC(=O)[O-])NC2=C(C=CC=C2Cl)Cl.[Na+]	C14H10Cl2NNaO2	318.13	0.0276	-0.98	-5.48
3930	K04	Experimental	Selleck Chemicals	S1903	Diclofenac Sodium	2 mM	6.66667		C1=CC=C(C(=C1)CC(=O)[O-])NC2=C(C=CC=C2Cl)Cl.[Na+]	C14H10Cl2NNaO2	318.13	0.0402	0.01	1.08
3930	K05	Experimental	Selleck Chemicals	S1965	Primidone	10 mM	33.3333		CCC1(C(=O)NCNC1=O)C2=CC=CC=C2	C12H14N2O2	218.252	0.0456	0.44	3.96
3930	K06	Experimental	Selleck Chemicals	S1965	Primidone	2 mM	6.66667		CCC1(C(=O)NCNC1=O)C2=CC=CC=C2	C12H14N2O2	218.252	0.0499	0.79	6.18
3930	K07	Experimental	Selleck Chemicals	S2491	Nitrendipine	10 mM	33.3333		CCOC(=O)C1=C(NC(=C(C1C2=CC(=CC=C2)[N+](=O)[O-])C(=O)OC)C)C	C18H20N2O6	360.361	0.0442	0.35	3.15
3930	K08	Experimental	Selleck Chemicals	S2491	Nitrendipine	2 mM	6.66667		CCOC(=O)C1=C(NC(=C(C1C2=CC(=CC=C2)[N+](=O)[O-])C(=O)OC)C)C	C18H20N2O6	360.361	0.0441	0.31	3.17
3930	K09	Experimental	Selleck Chemicals	S3212	Moclobemide (Ro 111163)	10 mM	33.3333		C1COCCN1CCNC(=O)C2=CC=C(C=C2)Cl	C13H17ClN2O2	268.739	0.0417	0.11	1.94
3930	K10	Experimental	Selleck Chemicals	S3212	Moclobemide (Ro 111163)	2 mM	6.66667		C1COCCN1CCNC(=O)C2=CC=C(C=C2)Cl	C13H17ClN2O2	268.739	0.0475	0.57	5
3930	K11	Experimental	Selleck Chemicals	S4143	Pentoxyverine Citrate	10 mM	33.3333		CCN(CC)CCOCCOC(=O)C1(CCCC1)C2=CC=CC=C2.C(C(=O)O)C(CC(=O)O)(C(=O)O)O	C26H39NO10	525.589	0.0365	-0.3	-0.76
3930	K12	Experimental	Selleck Chemicals	S4143	Pentoxyverine Citrate	2 mM	6.66667		CCN(CC)CCOCCOC(=O)C1(CCCC1)C2=CC=CC=C2.C(C(=O)O)C(CC(=O)O)(C(=O)O)O	C26H39NO10	525.589	0.0388	-0.1	0.39
3930	K13	Experimental	Selleck Chemicals	S5655	Venlafaxine	10 mM	33.3333		CN(C)CC(C1=CC=C(C=C1)OC)C2(CCCCC2)O	C17H27NO2	277.402	0.043	0.23	2.56
3930	K14	Experimental	Selleck Chemicals	S5655	Venlafaxine	2 mM	6.66667		CN(C)CC(C1=CC=C(C=C1)OC)C2(CCCCC2)O	C17H27NO2	277.402	0.0414	0.12	1.72
3930	K15	Experimental	Selleck Chemicals	S1693	Carbamazepine	10 mM	33.3333		C1=CC=C2C(=C1)C=CC3=CC=CC=C3N2C(=O)N	C15H12N2O	236.269	0.0476	0.61	4.93
3930	K16	Experimental	Selleck Chemicals	S1693	Carbamazepine	2 mM	6.66667		C1=CC=C2C(=C1)C=CC3=CC=CC=C3N2C(=O)N	C15H12N2O	236.269	0.0411	0.08	1.55
3930	K17	Experimental	Selleck Chemicals	S1329	Etomidate	10 mM	33.3333		CCOC(=O)C1=CN=C[N]1C(C)C2=CC=CC=C2	C14H16N2O2	244.289	0.0432	0.25	2.71
3930	K18	Experimental	Selleck Chemicals	S1329	Etomidate	2 mM	6.66667		CCOC(=O)C1=CN=C[N]1C(C)C2=CC=CC=C2	C14H16N2O2	244.289	0.0416	0.1	1.91
3930	K19	Experimental	Selleck Chemicals	S1808	Nifedipine	10 mM	33.3333		CC1=C(C(C(=C(N1)C)C(=O)OC)C2=CC=CC=C2[N+](=O)[O-])C(=O)OC	C17H18N2O6	346.335	0.0361	-0.33	-0.95
3930	K20	Experimental	Selleck Chemicals	S1808	Nifedipine	2 mM	6.66667		CC1=C(C(C(=C(N1)C)C(=O)OC)C2=CC=CC=C2[N+](=O)[O-])C(=O)OC	C17H18N2O6	346.335	0.039	-0.09	0.47
3930	K21	Empty										0.0388	-0.11	0.41
3930	K22	Empty										0.0358	-0.33	-1.22
3930	K23	Empty						Assay Negative Control				0.0376	-0.18	-0.26
3930	K24	Empty						Assay Negative Control				0.036	-0.34	-1.01
3930	L01	Empty										0.0313	-0.67	-3.61
3930	L02	Empty										0.0398	-0.03	0.92
3930	L03	Experimental	Selleck Chemicals	S1903	Diclofenac Sodium	400 uM	1.33333		C1=CC=C(C(=C1)CC(=O)[O-])NC2=C(C=CC=C2Cl)Cl.[Na+]	C14H10Cl2NNaO2	318.13	0.0467	0.52	4.52
3930	L04	Experimental	Selleck Chemicals	S1903	Diclofenac Sodium	80 uM	0.266667		C1=CC=C(C(=C1)CC(=O)[O-])NC2=C(C=CC=C2Cl)Cl.[Na+]	C14H10Cl2NNaO2	318.13	0.0443	0.32	3.33
3930	L05	Experimental	Selleck Chemicals	S1965	Primidone	400 uM	1.33333		CCC1(C(=O)NCNC1=O)C2=CC=CC=C2	C12H14N2O2	218.252	0.0475	0.58	5
3930	L06	Experimental	Selleck Chemicals	S1965	Primidone	80 uM	0.266667		CCC1(C(=O)NCNC1=O)C2=CC=CC=C2	C12H14N2O2	218.252	0.0454	0.43	3.83
3930	L07	Experimental	Selleck Chemicals	S2491	Nitrendipine	400 uM	1.33333		CCOC(=O)C1=C(NC(=C(C1C2=CC(=CC=C2)[N+](=O)[O-])C(=O)OC)C)C	C18H20N2O6	360.361	0.0481	0.62	5.26
3930	L08	Experimental	Selleck Chemicals	S2491	Nitrendipine	80 uM	0.266667		CCOC(=O)C1=C(NC(=C(C1C2=CC(=CC=C2)[N+](=O)[O-])C(=O)OC)C)C	C18H20N2O6	360.361	0.0454	0.42	3.87
3930	L09	Experimental	Selleck Chemicals	S3212	Moclobemide (Ro 111163)	400 uM	1.33333		C1COCCN1CCNC(=O)C2=CC=C(C=C2)Cl	C13H17ClN2O2	268.739	0.045	0.37	3.67
3930	L10	Experimental	Selleck Chemicals	S3212	Moclobemide (Ro 111163)	80 uM	0.266667		C1COCCN1CCNC(=O)C2=CC=C(C=C2)Cl	C13H17ClN2O2	268.739	0.0424	0.17	2.34
3930	L11	Experimental	Selleck Chemicals	S4143	Pentoxyverine Citrate	400 uM	1.33333		CCN(CC)CCOCCOC(=O)C1(CCCC1)C2=CC=CC=C2.C(C(=O)O)C(CC(=O)O)(C(=O)O)O	C26H39NO10	525.589	0.0411	0.09	1.59
3930	L12	Experimental	Selleck Chemicals	S4143	Pentoxyverine Citrate	80 uM	0.266667		CCN(CC)CCOCCOC(=O)C1(CCCC1)C2=CC=CC=C2.C(C(=O)O)C(CC(=O)O)(C(=O)O)O	C26H39NO10	525.589	0.0443	0.33	3.26
3930	L13	Experimental	Selleck Chemicals	S5655	Venlafaxine	400 uM	1.33333		CN(C)CC(C1=CC=C(C=C1)OC)C2(CCCCC2)O	C17H27NO2	277.402	0.0425	0.17	2.38
3930	L14	Experimental	Selleck Chemicals	S5655	Venlafaxine	80 uM	0.266667		CN(C)CC(C1=CC=C(C=C1)OC)C2(CCCCC2)O	C17H27NO2	277.402	0.0426	0.2	2.36
3930	L15	Experimental	Selleck Chemicals	S1693	Carbamazepine	400 uM	1.33333		C1=CC=C2C(=C1)C=CC3=CC=CC=C3N2C(=O)N	C15H12N2O	236.269	0.0426	0.18	2.42
3930	L16	Experimental	Selleck Chemicals	S1693	Carbamazepine	80 uM	0.266667		C1=CC=C2C(=C1)C=CC3=CC=CC=C3N2C(=O)N	C15H12N2O	236.269	0.0444	0.34	3.3
3930	L17	Experimental	Selleck Chemicals	S1329	Etomidate	400 uM	1.33333		CCOC(=O)C1=CN=C[N]1C(C)C2=CC=CC=C2	C14H16N2O2	244.289	0.0461	0.48	4.22
3930	L18	Experimental	Selleck Chemicals	S1329	Etomidate	80 uM	0.266667		CCOC(=O)C1=CN=C[N]1C(C)C2=CC=CC=C2	C14H16N2O2	244.289	0.0437	0.28	3
3930	L19	Experimental	Selleck Chemicals	S1808	Nifedipine	400 uM	1.33333		CC1=C(C(C(=C(N1)C)C(=O)OC)C2=CC=CC=C2[N+](=O)[O-])C(=O)OC	C17H18N2O6	346.335	0.0452	0.4	3.76
3930	L20	Experimental	Selleck Chemicals	S1808	Nifedipine	80 uM	0.266667		CC1=C(C(C(=C(N1)C)C(=O)OC)C2=CC=CC=C2[N+](=O)[O-])C(=O)OC	C17H18N2O6	346.335	0.0409	0.05	1.5
3930	L21	Empty										0.037	-0.24	-0.6
3930	L22	Empty										0.0439	0.32	3.05
3930	L23	Empty						Assay Negative Control				0.0438	0.28	3.06
3930	L24	Empty						Assay Negative Control				0.0392	-0.1	0.68
3930	M01	Empty										0.0547	1.16	8.74
3930	M02	Empty										0.044	0.34	2.99
3930	M03	Experimental	Selleck Chemicals	S2041	Dyclonine HCl	10 mM	33.3333		CCCCOC1=CC=C(C=C1)C(=O)CCN2CCCCC2.Cl	C18H28ClNO2	325.873	0.0382	-0.14	0.09
3930	M04	Experimental	Selleck Chemicals	S2041	Dyclonine HCl	2 mM	6.66667		CCCCOC1=CC=C(C=C1)C(=O)CCN2CCCCC2.Cl	C18H28ClNO2	325.873	0.0471	0.55	4.77
3930	M05	Experimental	Selleck Chemicals	S1828	Proparacaine HCl	10 mM	33.3333		CCCOC1=C(C=C(C=C1)C(=O)OCCN(CC)CC)N.Cl	C16H27ClN2O3	330.85	0.0414	0.08	1.85
3930	M06	Experimental	Selleck Chemicals	S1828	Proparacaine HCl	2 mM	6.66667		CCCOC1=C(C=C(C=C1)C(=O)OCCN(CC)CC)N.Cl	C16H27ClN2O3	330.85	0.0472	0.58	4.73
3930	M07	Experimental	Selleck Chemicals	S2085	Trimebutine	10 mM	33.3333		CCC(COC(=O)C1=CC(=C(C(=C1)OC)OC)OC)(C2=CC=CC=C2)N(C)C	C22H29NO5	387.469	0.038	-0.15	-0.03
3930	M08	Experimental	Selleck Chemicals	S2085	Trimebutine	2 mM	6.66667		CCC(COC(=O)C1=CC(=C(C(=C1)OC)OC)OC)(C2=CC=CC=C2)N(C)C	C22H29NO5	387.469	0.05	0.82	6.19
3930	M09	Experimental	Selleck Chemicals	S4023	Procaine HCl	10 mM	33.3333		CCN(CC)CCOC(=O)C1=CC=C(C=C1)N.Cl	C13H21ClN2O2	272.771	0.0466	0.53	4.41
3930	M10	Experimental	Selleck Chemicals	S4023	Procaine HCl	2 mM	6.66667		CCN(CC)CCOC(=O)C1=CC=C(C=C1)N.Cl	C13H21ClN2O2	272.771	0.0471	0.58	4.7
3930	M11	Experimental	Selleck Chemicals	S4583	Butamben	10 mM	33.3333		CCCCOC(=O)C1=CC=C(C=C1)N	C11H15NO2	193.242	0.0458	0.46	4.03
3930	M12	Experimental	Selleck Chemicals	S4583	Butamben	2 mM	6.66667		CCCCOC(=O)C1=CC=C(C=C1)N	C11H15NO2	193.242	0.0434	0.26	2.78
3930	M13	Experimental	Selleck Chemicals	S7924	Bay K 8644	10 mM	33.3333		CC1=C(C(C(=C(N1)C)[N+](=O)[O-])C2=CC=CC=C2C(F)(F)F)C(=O)OC	C16H15F3N2O4	356.297	0.0197	-1.63	-9.6
3930	M14	Experimental	Selleck Chemicals	S7924	Bay K 8644	2 mM	6.66667		CC1=C(C(C(=C(N1)C)[N+](=O)[O-])C2=CC=CC=C2C(F)(F)F)C(=O)OC	C16H15F3N2O4	356.297	0.0364	-0.31	-0.86
3930	M15	Experimental	Selleck Chemicals	S2456	Chlorpromazine HCl	10 mM	33.3333		Cl.CN(C)CCCN1C2=C(SC3=C1C=C(Cl)C=C3)C=CC=C2	C17H20Cl2N2S	355.325	0.0181	-1.76	-10.42
3930	M16	Experimental	Selleck Chemicals	S2456	Chlorpromazine HCl	2 mM	6.66667		Cl.CN(C)CCCN1C2=C(SC3=C1C=C(Cl)C=C3)C=CC=C2	C17H20Cl2N2S	355.325	0.0354	-0.39	-1.38
3930	M17	Experimental	Selleck Chemicals	S1333	Fluoxetine HCl	10 mM	33.3333		Cl.CNCCC(OC1=CC=C(C=C1)C(F)(F)F)C2=CC=CC=C2	C17H19ClF3NO	345.787	0.0177	-1.79	-10.59
3930	M18	Experimental	Selleck Chemicals	S1333	Fluoxetine HCl	2 mM	6.66667		Cl.CNCCC(OC1=CC=C(C=C1)C(F)(F)F)C2=CC=CC=C2	C17H19ClF3NO	345.787	0.0344	-0.47	-1.9
3930	M19	Experimental	Selleck Chemicals	S1747	Nimodipine	10 mM	33.3333		CC1=C(C(C(=C(N1)C)C(=O)OC(C)C)C2=CC(=CC=C2)[N+](=O)[O-])C(=O)OCCOC	C21H26N2O7	418.44	0.0177	-1.78	-10.68
3930	M20	Experimental	Selleck Chemicals	S1747	Nimodipine	2 mM	6.66667		CC1=C(C(C(=C(N1)C)C(=O)OC(C)C)C2=CC(=CC=C2)[N+](=O)[O-])C(=O)OCCOC	C21H26N2O7	418.44	0.0387	-0.11	0.35
3930	M21	Empty										0.0396	-0.05	0.86
3930	M22	Empty										0.0382	-0.15	0.06
3930	M23	Empty						Assay Negative Control				0.0364	-0.29	-0.87
3930	M24	Empty						Assay Negative Control				0.4229	28.6	206.64
3930	N01	Empty										0.046	0.47	4.13
3930	N02	Empty										0.039	-0.09	0.52
3930	N03	Experimental	Selleck Chemicals	S2041	Dyclonine HCl	400 uM	1.33333		CCCCOC1=CC=C(C=C1)C(=O)CCN2CCCCC2.Cl	C18H28ClNO2	325.873	0.0402	0	1.16
3930	N04	Experimental	Selleck Chemicals	S2041	Dyclonine HCl	80 uM	0.266667		CCCCOC1=CC=C(C=C1)C(=O)CCN2CCCCC2.Cl	C18H28ClNO2	325.873	0.0443	0.33	3.3
3930	N05	Experimental	Selleck Chemicals	S1828	Proparacaine HCl	400 uM	1.33333		CCCOC1=C(C=C(C=C1)C(=O)OCCN(CC)CC)N.Cl	C16H27ClN2O3	330.85	0.0458	0.45	4.07
3930	N06	Experimental	Selleck Chemicals	S1828	Proparacaine HCl	80 uM	0.266667		CCCOC1=C(C=C(C=C1)C(=O)OCCN(CC)CC)N.Cl	C16H27ClN2O3	330.85	0.0393	-0.06	0.67
3930	N07	Experimental	Selleck Chemicals	S2085	Trimebutine	400 uM	1.33333		CCC(COC(=O)C1=CC(=C(C(=C1)OC)OC)OC)(C2=CC=CC=C2)N(C)C	C22H29NO5	387.469	0.0478	0.61	5.14
3930	N08	Experimental	Selleck Chemicals	S2085	Trimebutine	80 uM	0.266667		CCC(COC(=O)C1=CC(=C(C(=C1)OC)OC)OC)(C2=CC=CC=C2)N(C)C	C22H29NO5	387.469	0.0432	0.25	2.67
3930	N09	Experimental	Selleck Chemicals	S4023	Procaine HCl	400 uM	1.33333		CCN(CC)CCOC(=O)C1=CC=C(C=C1)N.Cl	C13H21ClN2O2	272.771	0.0404	0.03	1.23
3930	N10	Experimental	Selleck Chemicals	S4023	Procaine HCl	80 uM	0.266667		CCN(CC)CCOC(=O)C1=CC=C(C=C1)N.Cl	C13H21ClN2O2	272.771	0.0451	0.41	3.66
3930	N11	Experimental	Selleck Chemicals	S4583	Butamben	400 uM	1.33333		CCCCOC(=O)C1=CC=C(C=C1)N	C11H15NO2	193.242	0.0408	0.03	1.5
3930	N12	Experimental	Selleck Chemicals	S4583	Butamben	80 uM	0.266667		CCCCOC(=O)C1=CC=C(C=C1)N	C11H15NO2	193.242	0.04	-0.01	1.06
3930	N13	Experimental	Selleck Chemicals	S7924	Bay K 8644	400 uM	1.33333		CC1=C(C(C(=C(N1)C)[N+](=O)[O-])C2=CC=CC=C2C(F)(F)F)C(=O)OC	C16H15F3N2O4	356.297	0.042	0.15	2.1
3930	N14	Experimental	Selleck Chemicals	S7924	Bay K 8644	80 uM	0.266667		CC1=C(C(C(=C(N1)C)[N+](=O)[O-])C2=CC=CC=C2C(F)(F)F)C(=O)OC	C16H15F3N2O4	356.297	0.0428	0.21	2.5
3930	N15	Experimental	Selleck Chemicals	S2456	Chlorpromazine HCl	400 uM	1.33333		Cl.CN(C)CCCN1C2=C(SC3=C1C=C(Cl)C=C3)C=CC=C2	C17H20Cl2N2S	355.325	0.0419	0.12	2.07
3930	N16	Experimental	Selleck Chemicals	S2456	Chlorpromazine HCl	80 uM	0.266667		Cl.CN(C)CCCN1C2=C(SC3=C1C=C(Cl)C=C3)C=CC=C2	C17H20Cl2N2S	355.325	0.0432	0.23	2.71
3930	N17	Experimental	Selleck Chemicals	S1333	Fluoxetine HCl	400 uM	1.33333		Cl.CNCCC(OC1=CC=C(C=C1)C(F)(F)F)C2=CC=CC=C2	C17H19ClF3NO	345.787	0.0409	0.05	1.52
3930	N18	Experimental	Selleck Chemicals	S1333	Fluoxetine HCl	80 uM	0.266667		Cl.CNCCC(OC1=CC=C(C=C1)C(F)(F)F)C2=CC=CC=C2	C17H19ClF3NO	345.787	0.0472	0.56	4.83
3930	N19	Experimental	Selleck Chemicals	S1747	Nimodipine	400 uM	1.33333		CC1=C(C(C(=C(N1)C)C(=O)OC(C)C)C2=CC(=CC=C2)[N+](=O)[O-])C(=O)OCCOC	C21H26N2O7	418.44	0.0392	-0.08	0.61
3930	N20	Experimental	Selleck Chemicals	S1747	Nimodipine	80 uM	0.266667		CC1=C(C(C(=C(N1)C)C(=O)OC(C)C)C2=CC(=CC=C2)[N+](=O)[O-])C(=O)OCCOC	C21H26N2O7	418.44	0.0393	-0.09	0.74
3930	N21	Empty										0.0376	-0.21	-0.23
3930	N22	Empty										0.033	-0.56	-2.68
3930	N23	Empty						Assay Negative Control				0.0419	0.14	2.06
3930	N24	Empty						Assay Negative Control				0.0338	-0.51	-2.25
3930	O01	Empty										0.0453	0.43	3.73
3930	O02	Empty										0.0447	0.39	3.43
3930	O03	Experimental	Selleck Chemicals	S1885	Felodipine	10 mM	33.3333		CCOC(=O)C1=C(NC(=C(C1C2=C(C(=CC=C2)Cl)Cl)C(=O)OC)C)C	C18H19Cl2NO4	384.254	0.0264	-1.07	-6.18
3930	O04	Experimental	Selleck Chemicals	S1885	Felodipine	2 mM	6.66667		CCOC(=O)C1=C(NC(=C(C1C2=C(C(=CC=C2)Cl)Cl)C(=O)OC)C)C	C18H19Cl2NO4	384.254	0.0334	-0.53	-2.47
3930	O05	Experimental	Selleck Chemicals	S1799	Ranolazine	10 mM	33.3333		CC1=C(C(=CC=C1)C)NC(=O)CN2CCN(CC2)CC(COC3=CC=CC=C3OC)O	C24H33N3O4	427.537	0.0448	0.37	3.57
3930	O06	Experimental	Selleck Chemicals	S1799	Ranolazine	2 mM	6.66667		CC1=C(C(=CC=C1)C)NC(=O)CN2CCN(CC2)CC(COC3=CC=CC=C3OC)O	C24H33N3O4	427.537	0.0409	0.07	1.48
3930	O07	Experimental	Selleck Chemicals	S2517	Maprotiline HCl	10 mM	33.3333		CNCCCC12CCC(C3=CC=CC=C31)C4=CC=CC=C24.Cl	C20H24ClN	313.864	0.0325	-0.61	-2.91
3930	O08	Experimental	Selleck Chemicals	S2517	Maprotiline HCl	2 mM	6.66667		CNCCCC12CCC(C3=CC=CC=C31)C4=CC=CC=C24.Cl	C20H24ClN	313.864	0.0417	0.14	1.88
3930	O09	Experimental	Selleck Chemicals	S4076	Propranolol HCl	10 mM	33.3333		CC(C)NCC(COC1=CC=CC2=CC=CC=C21)O.Cl	C16H22ClNO2	295.804	0.0413	0.1	1.7
3930	O10	Experimental	Selleck Chemicals	S4076	Propranolol HCl	2 mM	6.66667		CC(C)NCC(COC1=CC=CC2=CC=CC=C21)O.Cl	C16H22ClNO2	295.804	0.0452	0.36	3.83
3930	O11	Experimental	Selleck Chemicals	S4597	Lercanidipine hydrochloride	10 mM	33.3333		CC1=C(C(C(=C(N1)C)C(=O)OC(C)(C)CN(C)CCC(C2=CC=CC=C2)C3=CC=CC=C3)C4=CC(=CC=C4)[N+](=O)[O-])C(=O)OC.Cl	C36H42ClN3O6	648.188	0.0398	-0.03	0.97
3930	O12	Experimental	Selleck Chemicals	S4597	Lercanidipine hydrochloride	2 mM	6.66667		CC1=C(C(C(=C(N1)C)C(=O)OC(C)(C)CN(C)CCC(C2=CC=CC=C2)C3=CC=CC=C3)C4=CC(=CC=C4)[N+](=O)[O-])C(=O)OC.Cl	C36H42ClN3O6	648.188	0.0414	0.08	1.81
3930	O13	Experimental	Selleck Chemicals	S6073	Diclofenac acid	10 mM	33.3333		C1=CC=C(C(=C1)CC(=O)O)NC2=C(C=CC=C2Cl)Cl	C14H11Cl2NO2	296.149	0.0331	-0.56	-2.56
3930	O14	Experimental	Selleck Chemicals	S6073	Diclofenac acid	2 mM	6.66667		C1=CC=C(C(=C1)CC(=O)O)NC2=C(C=CC=C2Cl)Cl	C14H11Cl2NO2	296.149	0.0431	0.22	2.64
3930	O15	Experimental	Selleck Chemicals	S2459	Clozapine	10 mM	33.3333		CN1CCN(CC1)C2=NC3=C(C=CC(=C3)Cl)NC4=CC=CC=C42	C18H19ClN4	326.823	0.0293	-0.87	-4.51
3930	O16	Experimental	Selleck Chemicals	S2459	Clozapine	2 mM	6.66667		CN1CCN(CC1)C2=NC3=C(C=CC(=C3)Cl)NC4=CC=CC=C42	C18H19ClN4	326.823	0.0381	-0.16	0.06
3930	O17	Experimental	Selleck Chemicals	S4569	Fluphenazine dihydrochloride	10 mM	33.3333		Cl.Cl.OCCN1CCN(CCCN2C3=C(SC4=CC=C(C=C24)C(F)(F)F)C=CC=C3)CC1	C22H28Cl2F3N3OS	510.443	0.0244	-1.24	-7.14
3930	O18	Experimental	Selleck Chemicals	S4569	Fluphenazine dihydrochloride	2 mM	6.66667		Cl.Cl.OCCN1CCN(CCCN2C3=C(SC4=CC=C(C=C24)C(F)(F)F)C=CC=C3)CC1	C22H28Cl2F3N3OS	510.443	0.04	-0.02	1.05
3930	O19	Experimental	Selleck Chemicals	S3698	Nortriptyline hydrochloride	10 mM	33.3333		Cl.CNCCC=C1C2=C(CCC3=C1C=CC=C3)C=CC=C2	C19H22ClN	299.838	0.0229	-1.39	-7.82
3930	O20	Experimental	Selleck Chemicals	S3698	Nortriptyline hydrochloride	2 mM	6.66667		Cl.CNCCC=C1C2=C(CCC3=C1C=CC=C3)C=CC=C2	C19H22ClN	299.838	0.0294	-0.86	-4.47
3930	O21	Empty										0.0345	-0.44	-1.85
3930	O22	Empty										0.0317	-0.66	-3.34
3930	O23	Empty						Assay Negative Control				0.0404	0.01	1.27
3930	O24	Empty						Assay Negative Control				0.0373	-0.23	-0.36
3930	P01	Empty										0.0414	0.08	1.83
3930	P02	Empty										0.0408	0.04	1.46
3930	P03	Experimental	Selleck Chemicals	S1885	Felodipine	400 uM	1.33333		CCOC(=O)C1=C(NC(=C(C1C2=C(C(=CC=C2)Cl)Cl)C(=O)OC)C)C	C18H19Cl2NO4	384.254	0.0378	-0.19	-0.16
3930	P04	Experimental	Selleck Chemicals	S1885	Felodipine	80 uM	0.266667		CCOC(=O)C1=C(NC(=C(C1C2=C(C(=CC=C2)Cl)Cl)C(=O)OC)C)C	C18H19Cl2NO4	384.254	0.0394	-0.08	0.78
3930	P05	Experimental	Selleck Chemicals	S1799	Ranolazine	400 uM	1.33333		CC1=C(C(=CC=C1)C)NC(=O)CN2CCN(CC2)CC(COC3=CC=CC=C3OC)O	C24H33N3O4	427.537	0.0427	0.21	2.45
3930	P06	Experimental	Selleck Chemicals	S1799	Ranolazine	80 uM	0.266667		CC1=C(C(=CC=C1)C)NC(=O)CN2CCN(CC2)CC(COC3=CC=CC=C3OC)O	C24H33N3O4	427.537	0.0391	-0.09	0.61
3930	P07	Experimental	Selleck Chemicals	S2517	Maprotiline HCl	400 uM	1.33333		CNCCCC12CCC(C3=CC=CC=C31)C4=CC=CC=C24.Cl	C20H24ClN	313.864	0.0352	-0.42	-1.43
3930	P08	Experimental	Selleck Chemicals	S2517	Maprotiline HCl	80 uM	0.266667		CNCCCC12CCC(C3=CC=CC=C31)C4=CC=CC=C24.Cl	C20H24ClN	313.864	0.0386	-0.14	0.37
3930	P09	Experimental	Selleck Chemicals	S4076	Propranolol HCl	400 uM	1.33333		CC(C)NCC(COC1=CC=CC2=CC=CC=C21)O.Cl	C16H22ClNO2	295.804	0.0388	-0.09	0.39
3930	P10	Experimental	Selleck Chemicals	S4076	Propranolol HCl	80 uM	0.266667		CC(C)NCC(COC1=CC=CC2=CC=CC=C21)O.Cl	C16H22ClNO2	295.804	0.0339	-0.47	-2.2
3930	P11	Experimental	Selleck Chemicals	S4597	Lercanidipine hydrochloride	400 uM	1.33333		CC1=C(C(C(=C(N1)C)C(=O)OC(C)(C)CN(C)CCC(C2=CC=CC=C2)C3=CC=CC=C3)C4=CC(=CC=C4)[N+](=O)[O-])C(=O)OC.Cl	C36H42ClN3O6	648.188	0.0338	-0.49	-2.25
3930	P12	Experimental	Selleck Chemicals	S4597	Lercanidipine hydrochloride	80 uM	0.266667		CC1=C(C(C(=C(N1)C)C(=O)OC(C)(C)CN(C)CCC(C2=CC=CC=C2)C3=CC=CC=C3)C4=CC(=CC=C4)[N+](=O)[O-])C(=O)OC.Cl	C36H42ClN3O6	648.188	0.0384	-0.15	0.19
3930	P13	Experimental	Selleck Chemicals	S6073	Diclofenac acid	400 uM	1.33333		C1=CC=C(C(=C1)CC(=O)O)NC2=C(C=CC=C2Cl)Cl	C14H11Cl2NO2	296.149	0.0392	-0.07	0.63
3930	P14	Experimental	Selleck Chemicals	S6073	Diclofenac acid	80 uM	0.266667		C1=CC=C(C(=C1)CC(=O)O)NC2=C(C=CC=C2Cl)Cl	C14H11Cl2NO2	296.149	0.0367	-0.29	-0.68
3930	P15	Experimental	Selleck Chemicals	S2459	Clozapine	400 uM	1.33333		CN1CCN(CC1)C2=NC3=C(C=CC(=C3)Cl)NC4=CC=CC=C42	C18H19ClN4	326.823	0.0386	-0.12	0.3
3930	P16	Experimental	Selleck Chemicals	S2459	Clozapine	80 uM	0.266667		CN1CCN(CC1)C2=NC3=C(C=CC(=C3)Cl)NC4=CC=CC=C42	C18H19ClN4	326.823	0.039	-0.11	0.56
3930	P17	Experimental	Selleck Chemicals	S4569	Fluphenazine dihydrochloride	400 uM	1.33333		Cl.Cl.OCCN1CCN(CCCN2C3=C(SC4=CC=C(C=C24)C(F)(F)F)C=CC=C3)CC1	C22H28Cl2F3N3OS	510.443	0.0398	-0.04	0.93
3930	P18	Experimental	Selleck Chemicals	S4569	Fluphenazine dihydrochloride	80 uM	0.266667		Cl.Cl.OCCN1CCN(CCCN2C3=C(SC4=CC=C(C=C24)C(F)(F)F)C=CC=C3)CC1	C22H28Cl2F3N3OS	510.443	0.0388	-0.11	0.38
3930	P19	Experimental	Selleck Chemicals	S3698	Nortriptyline hydrochloride	400 uM	1.33333		Cl.CNCCC=C1C2=C(CCC3=C1C=CC=C3)C=CC=C2	C19H22ClN	299.838	0.0344	-0.47	-1.86
3930	P20	Experimental	Selleck Chemicals	S3698	Nortriptyline hydrochloride	80 uM	0.266667		Cl.CNCCC=C1C2=C(CCC3=C1C=CC=C3)C=CC=C2	C19H22ClN	299.838	0.0386	-0.13	0.3
3930	P21	Empty										0.0357	-0.36	-1.2
3930	P22	Empty										0.0333	-0.55	-2.48
3930	P23	Empty						Assay Negative Control				0.0336	-0.51	-2.31
3930	P24	Empty						Assay Negative Control				0.0499	0.78	6.18
3931	A01	Empty										0.033	-0.26	-0.45
3931	A02	Empty										0.0326	-0.27	-0.68
3931	A03	Experimental	Selleck Chemicals	S5428	Promazine hydrochloride	10 mM	33.3333		Cl.CN(C)CCCN1C2=CC=CC=C2SC3=C1C=CC=C3	C17H21ClN2S	320.88	0.0239	-0.76	-4.96
3931	A04	Experimental	Selleck Chemicals	S5428	Promazine hydrochloride	2 mM	6.66667		Cl.CN(C)CCCN1C2=CC=CC=C2SC3=C1C=CC=C3	C17H21ClN2S	320.88	0.0356	-0.1	0.78
3931	A05	Experimental	Selleck Chemicals	S4202	Verapamil HCl	10 mM	33.3333		Cl.COC1=CC=C(CCN(C)CCCC(C#N)(C(C)C)C2=CC=C(OC)C(=C2)OC)C=C1OC	C27H39ClN2O4	491.063	0.0265	-0.6	-3.66
3931	A06	Experimental	Selleck Chemicals	S4202	Verapamil HCl	2 mM	6.66667		Cl.COC1=CC=C(CCN(C)CCCC(C#N)(C(C)C)C2=CC=C(OC)C(=C2)OC)C=C1OC	C27H39ClN2O4	491.063	0.0361	-0.07	1.03
3931	A07	Experimental	MedChem Express	HY-B1114	Gliquidone	10 mM	33.3333		CC1(C2=C(C=C(C=C2)OC)C(=O)N(C1=O)CCC3=CC=C(C=C3)S(=O)(=O)NC(=O)NC4CCCCC4)C	C27H33N3O6S	527.632	0.0144	-1.28	-9.62
3931	A08	Experimental	MedChem Express	HY-B1114	Gliquidone	2 mM	6.66667		CC1(C2=C(C=C(C=C2)OC)C(=O)N(C1=O)CCC3=CC=C(C=C3)S(=O)(=O)NC(=O)NC4CCCCC4)C	C27H33N3O6S	527.632	0.0297	-0.44	-2.12
3931	A09	Experimental	Sigma Aldrich	SML1025	Lorcainide hydrochloride	10 mM	33.3333		CC(C)N1CCC(CC1)N(C2=CC=C(C=C2)Cl)C(=O)CC3=CC=CC=C3.Cl	C22H28Cl2N2O	407.377	0.0316	-0.33	-1.14
3931	A10	Experimental	Sigma Aldrich	SML1025	Lorcainide hydrochloride	2 mM	6.66667		CC(C)N1CCC(CC1)N(C2=CC=C(C=C2)Cl)C(=O)CC3=CC=CC=C3.Cl	C22H28Cl2N2O	407.377	0.0347	-0.15	0.35
3931	A11	Experimental	MedChem Express	HY-114301A	PF-06305591 dihydrate	10 mM	33.3333		CC(C)(C)C1=CC=C(NC([C@H]([C@@H](C)C(N)=O)N)=N2)C2=C1.[H]O[H].[H]O[H]	C15H26N4O3	310.392	0.0372	-0.01	1.6
3931	A12	Experimental	MedChem Express	HY-114301A	PF-06305591 dihydrate	2 mM	6.66667		CC(C)(C)C1=CC=C(NC([C@H]([C@@H](C)C(N)=O)N)=N2)C2=C1.[H]O[H].[H]O[H]	C15H26N4O3	310.392	0.0334	-0.22	-0.3
3931	A13	Experimental	MedChem Express	HY-108335	Sipatrigine	10 mM	33.3333		CN1CCN(CC1)C2=NC=C(C(=N2)N)C3=C(C(=CC(=C3)Cl)Cl)Cl	C15H16Cl3N5	372.68	0.0249	-0.7	-4.44
3931	A14	Experimental	MedChem Express	HY-108335	Sipatrigine	2 mM	6.66667		CN1CCN(CC1)C2=NC=C(C(=N2)N)C3=C(C(=CC(=C3)Cl)Cl)Cl	C15H16Cl3N5	372.68	0.0317	-0.33	-1.1
3931	A15	Experimental	MedChem Express	HY-W011051	2-Arachidonyl-glycerol	10 mM	33.3333		CCCCCC=CCC=CCC=CCC=CCCCC(=O)OC(CO)CO	C23H38O4	378.545	0.0304	-0.39	-1.74
3931	A16	Experimental	MedChem Express	HY-W011051	2-Arachidonyl-glycerol	2 mM	6.66667		CCCCCC=CCC=CCC=CCC=CCCCC(=O)OC(CO)CO	C23H38O4	378.545	0.0337	-0.21	-0.14
3931	A17	Experimental	MedChem Express	HY-W001160	5-Hydroxyindole	10 mM	33.3333		C1=CC2=C(C=CN2)C=C1O	C8H7NO	133.147	0.0351	-0.13	0.56
3931	A18	Experimental	MedChem Express	HY-W001160	5-Hydroxyindole	2 mM	6.66667		C1=CC2=C(C=CN2)C=C1O	C8H7NO	133.147	0.0354	-0.12	0.71
3931	A19	Experimental	MedChem Express	HY-12961A	Bretylium tosylate	10 mM	33.3333		C[N+](C)(CC)CC1=CC=CC=C1Br.O=S(C2=CC=C(C)C=C2)([O-])=O	C18H24BrNO3S	414.357	0.0301	-0.41	-1.91
3931	A20	Experimental	MedChem Express	HY-12961A	Bretylium tosylate	2 mM	6.66667		C[N+](C)(CC)CC1=CC=CC=C1Br.O=S(C2=CC=C(C)C=C2)([O-])=O	C18H24BrNO3S	414.357	0.0307	-0.38	-1.59
3931	A21	Experimental	MedChem Express	HY-B0725	Doxepin Hydrochloride	10 mM	33.3333		CN(C)CC/C=C1C2=CC=CC=C2OCC3=CC=CC=C/13.Cl	C19H22ClNO	315.837	0.0258	-0.65	-4.04
3931	A22	Experimental	MedChem Express	HY-B0725	Doxepin Hydrochloride	2 mM	6.66667		CN(C)CC/C=C1C2=CC=CC=C2OCC3=CC=CC=C/13.Cl	C19H22ClNO	315.837	0.0279	-0.54	-3
3931	A23	Empty						Assay Positive Control				0.2333	10.97	98
3931	A24	Empty						Assay Positive Control				0.2153	9.93	89.24
3931	B01	Empty										0.0374	-0.01	1.7
3931	B02	Empty										0.0344	-0.17	0.2
3931	B03	Experimental	Selleck Chemicals	S5428	Promazine hydrochloride	400 uM	1.33333		Cl.CN(C)CCCN1C2=CC=CC=C2SC3=C1C=CC=C3	C17H21ClN2S	320.88	0.0373	-0.01	1.68
3931	B04	Experimental	Selleck Chemicals	S5428	Promazine hydrochloride	80 uM	0.266667		Cl.CN(C)CCCN1C2=CC=CC=C2SC3=C1C=CC=C3	C17H21ClN2S	320.88	0.039	0.1	2.45
3931	B05	Experimental	Selleck Chemicals	S4202	Verapamil HCl	400 uM	1.33333		Cl.COC1=CC=C(CCN(C)CCCC(C#N)(C(C)C)C2=CC=C(OC)C(=C2)OC)C=C1OC	C27H39ClN2O4	491.063	0.0385	0.06	2.22
3931	B06	Experimental	Selleck Chemicals	S4202	Verapamil HCl	80 uM	0.266667		Cl.COC1=CC=C(CCN(C)CCCC(C#N)(C(C)C)C2=CC=C(OC)C(=C2)OC)C=C1OC	C27H39ClN2O4	491.063	0.0331	-0.23	-0.44
3931	B07	Experimental	MedChem Express	HY-B1114	Gliquidone	400 uM	1.33333		CC1(C2=C(C=C(C=C2)OC)C(=O)N(C1=O)CCC3=CC=C(C=C3)S(=O)(=O)NC(=O)NC4CCCCC4)C	C27H33N3O6S	527.632	0.0359	-0.06	0.9
3931	B08	Experimental	MedChem Express	HY-B1114	Gliquidone	80 uM	0.266667		CC1(C2=C(C=C(C=C2)OC)C(=O)N(C1=O)CCC3=CC=C(C=C3)S(=O)(=O)NC(=O)NC4CCCCC4)C	C27H33N3O6S	527.632	0.0386	0.07	2.29
3931	B09	Experimental	Sigma Aldrich	SML1025	Lorcainide hydrochloride	400 uM	1.33333		CC(C)N1CCC(CC1)N(C2=CC=C(C=C2)Cl)C(=O)CC3=CC=CC=C3.Cl	C22H28Cl2N2O	407.377	0.0369	-0.03	1.45
3931	B10	Experimental	Sigma Aldrich	SML1025	Lorcainide hydrochloride	80 uM	0.266667		CC(C)N1CCC(CC1)N(C2=CC=C(C=C2)Cl)C(=O)CC3=CC=CC=C3.Cl	C22H28Cl2N2O	407.377	0.0355	-0.1	0.74
3931	B11	Experimental	MedChem Express	HY-114301A	PF-06305591 dihydrate	400 uM	1.33333		CC(C)(C)C1=CC=C(NC([C@H]([C@@H](C)C(N)=O)N)=N2)C2=C1.[H]O[H].[H]O[H]	C15H26N4O3	310.392	0.0405	0.16	3.25
3931	B12	Experimental	MedChem Express	HY-114301A	PF-06305591 dihydrate	80 uM	0.266667		CC(C)(C)C1=CC=C(NC([C@H]([C@@H](C)C(N)=O)N)=N2)C2=C1.[H]O[H].[H]O[H]	C15H26N4O3	310.392	0.0352	-0.12	0.61
3931	B13	Experimental	MedChem Express	HY-108335	Sipatrigine	400 uM	1.33333		CN1CCN(CC1)C2=NC=C(C(=N2)N)C3=C(C(=CC(=C3)Cl)Cl)Cl	C15H16Cl3N5	372.68	0.033	-0.25	-0.46
3931	B14	Experimental	MedChem Express	HY-108335	Sipatrigine	80 uM	0.266667		CN1CCN(CC1)C2=NC=C(C(=N2)N)C3=C(C(=CC(=C3)Cl)Cl)Cl	C15H16Cl3N5	372.68	0.0338	-0.2	-0.1
3931	B15	Experimental	MedChem Express	HY-W011051	2-Arachidonyl-glycerol	400 uM	1.33333		CCCCCC=CCC=CCC=CCC=CCCCC(=O)OC(CO)CO	C23H38O4	378.545	0.0359	-0.09	0.97
3931	B16	Experimental	MedChem Express	HY-W011051	2-Arachidonyl-glycerol	80 uM	0.266667		CCCCCC=CCC=CCC=CCC=CCCCC(=O)OC(CO)CO	C23H38O4	378.545	0.0331	-0.24	-0.44
3931	B17	Experimental	MedChem Express	HY-W001160	5-Hydroxyindole	400 uM	1.33333		C1=CC2=C(C=CN2)C=C1O	C8H7NO	133.147	0.035	-0.14	0.5
3931	B18	Experimental	MedChem Express	HY-W001160	5-Hydroxyindole	80 uM	0.266667		C1=CC2=C(C=CN2)C=C1O	C8H7NO	133.147	0.0322	-0.29	-0.89
3931	B19	Experimental	MedChem Express	HY-12961A	Bretylium tosylate	400 uM	1.33333		C[N+](C)(CC)CC1=CC=CC=C1Br.O=S(C2=CC=C(C)C=C2)([O-])=O	C18H24BrNO3S	414.357	0.0327	-0.27	-0.61
3931	B20	Experimental	MedChem Express	HY-12961A	Bretylium tosylate	80 uM	0.266667		C[N+](C)(CC)CC1=CC=CC=C1Br.O=S(C2=CC=C(C)C=C2)([O-])=O	C18H24BrNO3S	414.357	0.0324	-0.29	-0.76
3931	B21	Experimental	MedChem Express	HY-B0725	Doxepin Hydrochloride	400 uM	1.33333		CN(C)CC/C=C1C2=CC=CC=C2OCC3=CC=CC=C/13.Cl	C19H22ClNO	315.837	0.0309	-0.37	-1.49
3931	B22	Experimental	MedChem Express	HY-B0725	Doxepin Hydrochloride	80 uM	0.266667		CN(C)CC/C=C1C2=CC=CC=C2OCC3=CC=CC=C/13.Cl	C19H22ClNO	315.837	0.0313	-0.35	-1.31
3931	B23	Empty						Assay Positive Control				0.2329	10.92	97.9
3931	B24	Empty						Assay Positive Control				0.2321	10.91	97.37
3931	C01	Empty										0.0334	-0.23	-0.3
3931	C02	Empty										0.0323	-0.28	-0.85
3931	C03	Experimental	Selleck Chemicals	S2500	Propafenone HCl	10 mM	33.3333		CCCNCC(COC1=CC=CC=C1C(=O)CCC2=CC=CC=C2)O.Cl	C21H28ClNO3	377.905	0.0204	-0.95	-6.65
3931	C04	Experimental	Selleck Chemicals	S2500	Propafenone HCl	2 mM	6.66667		CCCNCC(COC1=CC=CC=C1C(=O)CCC2=CC=CC=C2)O.Cl	C21H28ClNO3	377.905	0.0362	-0.05	1.07
3931	C05	Experimental	Selleck Chemicals	S2482	Manidipine	10 mM	33.3333		CC1=C(C(C(=C(N1)C)C(=O)OCCN2CCN(CC2)C(C3=CC=CC=C3)C4=CC=CC=C4)C5=CC(=CC=C5)[N+](=O)[O-])C(=O)OC.Cl.Cl	C35H40Cl2N4O6	683.621	0.037	-0.03	1.53
3931	C06	Experimental	Selleck Chemicals	S2482	Manidipine	2 mM	6.66667		CC1=C(C(C(=C(N1)C)C(=O)OCCN2CCN(CC2)C(C3=CC=CC=C3)C4=CC=CC=C4)C5=CC(=CC=C5)[N+](=O)[O-])C(=O)OC.Cl.Cl	C35H40Cl2N4O6	683.621	0.0377	0.01	1.84
3931	C07	Experimental	MedChem Express	HY-B0997	Hydroquinidine	10 mM	33.3333		CCC1CN2CCC1CC2C(C3=C4C=C(C=CC4=NC=C3)OC)O	C20H26N2O2	326.433	0.039	0.1	2.46
3931	C08	Experimental	MedChem Express	HY-B0997	Hydroquinidine	2 mM	6.66667		CCC1CN2CCC1CC2C(C3=C4C=C(C=CC4=NC=C3)OC)O	C20H26N2O2	326.433	0.0416	0.23	3.77
3931	C09	Experimental	MedChem Express	HY-15553A	Mibefradil dihydrochloride	10 mM	33.3333		O=C(O[C@@]1(CCN(CCCC2=NC3=CC=CC=C3N2)C)[C@@H](C(C)C)C4=C(C=C(F)C=C4)CC1)COC.[H]Cl.[H]Cl	C29H40Cl2FN3O3	568.551	0.0114	-1.45	-11.12
3931	C10	Experimental	MedChem Express	HY-15553A	Mibefradil dihydrochloride	2 mM	6.66667		O=C(O[C@@]1(CCN(CCCC2=NC3=CC=CC=C3N2)C)[C@@H](C(C)C)C4=C(C=C(F)C=C4)CC1)COC.[H]Cl.[H]Cl	C29H40Cl2FN3O3	568.551	0.0315	-0.33	-1.2
3931	C11	Experimental	MedChem Express	HY-14290A	Pinacidil monohydrate	10 mM	33.3333		[H]O[H].CC(C)(C)C(N/C(NC#N)=N/C1=CC=NC=C1)C	C13H21N5O	263.339	0.0397	0.13	2.78
3931	C12	Experimental	MedChem Express	HY-14290A	Pinacidil	2 mM	6.66667		[H]O[H].CC(C)(C)C(N/C(NC#N)=N/C1=CC=NC=C1)C	C13H21N5O	263.339	0.0374	0	1.71
3931	C13	Experimental	MedChem Express	HY-W012185	Sparteine	10 mM	33.3333		C1CCN2CC3CC(C2C1)CN4C3CCCC4	C15H26N2	234.38	0.0407	0.18	3.33
3931	C14	Experimental	MedChem Express	HY-W012185	Sparteine	2 mM	6.66667		C1CCN2CC3CC(C2C1)CN4C3CCCC4	C15H26N2	234.38	0.0379	0.03	1.91
3931	C15	Experimental	MedChem Express	HY-109590	Arachidonic acid	10 mM	33.3333		CCCCC/C=C\C/C=C\C/C=C\C/C=C\CCCC(O)=O	C20H32O2	304.467	0.0466	0.5	6.22
3931	C16	Experimental	MedChem Express	HY-109590	Arachidonic acid	2 mM	6.66667		CCCCC/C=C\C/C=C\C/C=C\C/C=C\CCCC(O)=O	C20H32O2	304.467	0.0294	-0.45	-2.27
3931	C17	Experimental	MedChem Express	HY-WAA0304	Agmatine	10 mM	33.3333		C(CCN=C(N)N)CN	C5H14N4	130.191	0.0359	-0.08	0.95
3931	C18	Experimental	MedChem Express	HY-WAA0304	Agmatine	2 mM	6.66667		C(CCN=C(N)N)CN	C5H14N4	130.191	0.0335	-0.22	-0.2
3931	C19	Experimental	MedChem Express	HY-B1007	Butacaine	10 mM	33.3333		CCCCN(CCCC)CCCOC(=O)C1=CC=C(C=C1)N	C18H30N2O2	306.443	0.0274	-0.56	-3.23
3931	C20	Experimental	MedChem Express	HY-B1007	Butacaine	2 mM	6.66667		CCCCN(CCCC)CCCOC(=O)C1=CC=C(C=C1)N	C18H30N2O2	306.443	0.0322	-0.29	-0.89
3931	C21	Experimental	MedChem Express	HY-16738A	Eleclazine hydrochloride	10 mM	33.3333		O=C1N(CC2=NC=CC=N2)CCOC3=CC=C(C4=CC=C(OC(F)(F)F)C=C4)C=C13.[H]Cl	C21H17ClF3N3O3	451.826	0.0432	0.33	4.51
3931	C22	Experimental	MedChem Express	HY-16738A	Eleclazine hydrochloride	2 mM	6.66667		O=C1N(CC2=NC=CC=N2)CCOC3=CC=C(C4=CC=C(OC(F)(F)F)C=C4)C=C13.[H]Cl	C21H17ClF3N3O3	451.826	0.059	1.21	12.34
3931	C23	Empty						Assay Positive Control				0.2453	11.61	103.97
3931	C24	Empty						Assay Positive Control				0.238	11.25	100.27
3931	D01	Empty										0.0351	-0.13	0.55
3931	D02	Empty										0.0414	0.22	3.67
3931	D03	Experimental	Selleck Chemicals	S2500	Propafenone HCl	400 uM	1.33333		CCCNCC(COC1=CC=CC=C1C(=O)CCC2=CC=CC=C2)O.Cl	C21H28ClNO3	377.905	0.0433	0.33	4.55
3931	D04	Experimental	Selleck Chemicals	S2500	Propafenone HCl	80 uM	0.266667		CCCNCC(COC1=CC=CC=C1C(=O)CCC2=CC=CC=C2)O.Cl	C21H28ClNO3	377.905	0.0431	0.33	4.47
3931	D05	Experimental	Selleck Chemicals	S2482	Manidipine	400 uM	1.33333		CC1=C(C(C(=C(N1)C)C(=O)OCCN2CCN(CC2)C(C3=CC=CC=C3)C4=CC=CC=C4)C5=CC(=CC=C5)[N+](=O)[O-])C(=O)OC.Cl.Cl	C35H40Cl2N4O6	683.621	0.0414	0.22	3.64
3931	D06	Experimental	Selleck Chemicals	S2482	Manidipine	80 uM	0.266667		CC1=C(C(C(=C(N1)C)C(=O)OCCN2CCN(CC2)C(C3=CC=CC=C3)C4=CC=CC=C4)C5=CC(=CC=C5)[N+](=O)[O-])C(=O)OC.Cl.Cl	C35H40Cl2N4O6	683.621	0.0362	-0.05	1.08
3931	D07	Experimental	MedChem Express	HY-B0997	Hydroquinidine	400 uM	1.33333		CCC1CN2CCC1CC2C(C3=C4C=C(C=CC4=NC=C3)OC)O	C20H26N2O2	326.433	0.0382	0.05	2.08
3931	D08	Experimental	MedChem Express	HY-B0997	Hydroquinidine	80 uM	0.266667		CCC1CN2CCC1CC2C(C3=C4C=C(C=CC4=NC=C3)OC)O	C20H26N2O2	326.433	0.0387	0.08	2.29
3931	D09	Experimental	MedChem Express	HY-15553A	Mibefradil dihydrochloride	400 uM	1.33333		O=C(O[C@@]1(CCN(CCCC2=NC3=CC=CC=C3N2)C)[C@@H](C(C)C)C4=C(C=C(F)C=C4)CC1)COC.[H]Cl.[H]Cl	C29H40Cl2FN3O3	568.551	0.0368	-0.03	1.35
3931	D10	Experimental	MedChem Express	HY-15553A	Mibefradil dihydrochloride	80 uM	0.266667		O=C(O[C@@]1(CCN(CCCC2=NC3=CC=CC=C3N2)C)[C@@H](C(C)C)C4=C(C=C(F)C=C4)CC1)COC.[H]Cl.[H]Cl	C29H40Cl2FN3O3	568.551	0.0431	0.32	4.48
3931	D11	Experimental	MedChem Express	HY-14290A	Pinacidil	400 uM	1.33333		[H]O[H].CC(C)(C)C(N/C(NC#N)=N/C1=CC=NC=C1)C	C13H21N5O	263.339	0.0392	0.1	2.6
3931	D12	Experimental	MedChem Express	HY-14290A	Pinacidil	80 uM	0.266667		[H]O[H].CC(C)(C)C(N/C(NC#N)=N/C1=CC=NC=C1)C	C13H21N5O	263.339	0.0442	0.39	5.01
3931	D13	Experimental	MedChem Express	HY-W012185	Sparteine	400 uM	1.33333		C1CCN2CC3CC(C2C1)CN4C3CCCC4	C15H26N2	234.38	0.0454	0.44	5.66
3931	D14	Experimental	MedChem Express	HY-W012185	Sparteine	80 uM	0.266667		C1CCN2CC3CC(C2C1)CN4C3CCCC4	C15H26N2	234.38	0.0423	0.27	4.07
3931	D15	Experimental	MedChem Express	HY-109590	Arachidonic acid	400 uM	1.33333		CCCCC/C=C\C/C=C\C/C=C\C/C=C\CCCC(O)=O	C20H32O2	304.467	0.0385	0.07	2.22
3931	D16	Experimental	MedChem Express	HY-109590	Arachidonic acid	80 uM	0.266667		CCCCC/C=C\C/C=C\C/C=C\C/C=C\CCCC(O)=O	C20H32O2	304.467	0.0327	-0.26	-0.6
3931	D17	Experimental	MedChem Express	HY-WAA0304	Agmatine	400 uM	1.33333		C(CCN=C(N)N)CN	C5H14N4	130.191	0.0351	-0.14	0.6
3931	D18	Experimental	MedChem Express	HY-WAA0304	Agmatine	80 uM	0.266667		C(CCN=C(N)N)CN	C5H14N4	130.191	0.0367	-0.05	1.38
3931	D19	Experimental	MedChem Express	HY-B1007	Butacaine	400 uM	1.33333		CCCCN(CCCC)CCCOC(=O)C1=CC=C(C=C1)N	C18H30N2O2	306.443	0.0317	-0.32	-1.12
3931	D20	Experimental	MedChem Express	HY-B1007	Butacaine	80 uM	0.266667		CCCCN(CCCC)CCCOC(=O)C1=CC=C(C=C1)N	C18H30N2O2	306.443	0.037	-0.04	1.5
3931	D21	Experimental	MedChem Express	HY-16738A	Eleclazine hydrochloride	400 uM	1.33333		O=C1N(CC2=NC=CC=N2)CCOC3=CC=C(C4=CC=C(OC(F)(F)F)C=C4)C=C13.[H]Cl	C21H17ClF3N3O3	451.826	0.0467	0.51	6.29
3931	D22	Experimental	MedChem Express	HY-16738A	Eleclazine hydrochloride	80 uM	0.266667		O=C1N(CC2=NC=CC=N2)CCOC3=CC=C(C4=CC=C(OC(F)(F)F)C=C4)C=C13.[H]Cl	C21H17ClF3N3O3	451.826	0.0377	0.01	1.81
3931	D23	Empty						Assay Positive Control				0.2396	11.3	101.18
3931	D24	Empty						Assay Positive Control				0.2442	11.6	103.3
3931	E01	Empty										0.03	-0.42	-1.94
3931	E02	Empty										0.0338	-0.21	-0.03
3931	E03	Experimental	Selleck Chemicals	S9510	Protriptyline hydrochloride	10 mM	33.3333		Cl.CNCCCC1C2=C(C=CC=C2)C=CC3=C1C=CC=C3	C19H22ClN	299.838	0.0296	-0.44	-2.15
3931	E04	Experimental	Selleck Chemicals	S9510	Protriptyline hydrochloride	2 mM	6.66667		Cl.CNCCCC1C2=C(C=CC=C2)C=CC3=C1C=CC=C3	C19H22ClN	299.838	0.0401	0.16	3
3931	E05	Experimental	MedChem Express	HY-76542	Ergocalciferol	10 mM	33.3333		CC(C)C(C)C=CC(C)C1CCC2C1(CCCC2=CC=C3CC(CCC3=C)O)C	C28H44O	396.648	0.0373	-0.01	1.64
3931	E06	Experimental	MedChem Express	HY-76542	Ergocalciferol	2 mM	6.66667		CC(C)C(C)C=CC(C)C1CCC2C1(CCCC2=CC=C3CC(CCC3=C)O)C	C28H44O	396.648	0.0433	0.33	4.55
3931	E07	Experimental	MedChem Express	HY-16787	ICA 121431	10 mM	33.3333		C1=CC=C(C=C1)C(C2=CC=CC=C2)C(=O)NC3=CC=C(C=C3)S(=O)(=O)NC4=NC=CS4	C23H19N3O3S2	449.545	0.0352	-0.12	0.61
3931	E08	Experimental	MedChem Express	HY-16787	ICA 121431	2 mM	6.66667		C1=CC=C(C=C1)C(C2=CC=CC=C2)C(=O)NC3=CC=C(C=C3)S(=O)(=O)NC4=NC=CS4	C23H19N3O3S2	449.545	0.0363	-0.06	1.14
3931	E09	Experimental	MedChem Express	HY-B1109	N-acetylprocainamide	10 mM	33.3333		CCN(CC)CCNC(=O)C1=CC=C(C=C1)NC(=O)C	C15H23N3O2	277.362	0.0401	0.15	2.99
3931	E10	Experimental	MedChem Express	HY-B1109	N-acetylprocainamide	2 mM	6.66667		CCN(CC)CCNC(=O)C1=CC=C(C=C1)NC(=O)C	C15H23N3O2	277.362	0.0401	0.15	3.03
3931	E11	Experimental	MedChem Express	HY-A0084	Procainamide hydrochloride	10 mM	33.3333		O=C(NCCN(CC)CC)C1=CC=C(N)C=C1.[H]Cl	C13H22ClN3O	271.786	0.0448	0.41	5.36
3931	E12	Experimental	MedChem Express	HY-A0084	Procainamide hydrochloride	2 mM	6.66667		O=C(NCCN(CC)CC)C1=CC=C(N)C=C1.[H]Cl	C13H22ClN3O	271.786	0.0385	0.06	2.23
3931	E13	Experimental	MedChem Express	HY-B0561	Spironolactone	10 mM	33.3333		CC(=O)SC1CC2=CC(=O)CCC2(C3C1C4CCC5(C4(CC3)C)CCC(=O)O5)C	C24H32O4S	416.573	0.0316	-0.33	-1.14
3931	E14	Experimental	MedChem Express	HY-B0561	Spironolactone	2 mM	6.66667		CC(=O)SC1CC2=CC(=O)CCC2(C3C1C4CCC5(C4(CC3)C)CCC(=O)O5)C	C24H32O4S	416.573	0.0333	-0.23	-0.31
3931	E15	Experimental	TargetMol	TWS0414	Cannabidiol	10 mM	33.3333		CCCCCC1=CC(=C(C(=C1)O)C2C=C(CCC2C(=C)C)C)O	C21H30O2	314.462	0.0609	1.32	13.22
3931	E16	Experimental	TargetMol	TWS0414	Cannabidiol	2 mM	6.66667		CCCCCC1=CC(=C(C(=C1)O)C2C=C(CCC2C(=C)C)C)O	C21H30O2	314.462	0.0831	2.54	24.16
3931	E17	Experimental	MedChem Express	HY-B1167	Ajmaline	10 mM	33.3333		CCC1C2CC3C4C5(CC(C2C5O)N3C1O)C6=CC=CC=C6N4C	C20H26N2O2	326.433	0.0361	-0.08	1.07
3931	E18	Experimental	MedChem Express	HY-B1167	Ajmaline	2 mM	6.66667		CCC1C2CC3C4C5(CC(C2C5O)N3C1O)C6=CC=CC=C6N4C	C20H26N2O2	326.433	0.0408	0.18	3.4
3931	E19	Experimental	MedChem Express	HY-B0274	Chlorprothixene	10 mM	33.3333		CN(C)CCC=C1C2=CC=CC=C2SC3=C1C=C(C=C3)Cl	C18H18ClNS	315.86	0.0178	-1.1	-7.97
3931	E20	Experimental	MedChem Express	HY-B0274	Chlorprothixene	2 mM	6.66667		CN(C)CCC=C1C2=CC=CC=C2SC3=C1C=C(C=C3)Cl	C18H18ClNS	315.86	0.0295	-0.44	-2.21
3931	E21	Experimental	Tocris	2815	Valproic acid	10 mM	33.3333		CCCC(CCC)C(=O)[O-].[Na+]	C8H15NaO2	166.193	0.0364	-0.06	1.21
3931	E22	Experimental	Tocris	2815	Valproic acid	2 mM	6.66667		CCCC(CCC)C(=O)[O-].[Na+]	C8H15NaO2	166.193	0.0364	-0.06	1.16
3931	E23	Empty						Assay Positive Control				0.2513	11.98	106.86
3931	E24	Empty						Assay Positive Control				0.2395	11.31	101.04
3931	F01	Empty										0.0343	-0.18	0.16
3931	F02	Empty										0.0287	-0.49	-2.63
3931	F03	Experimental	Selleck Chemicals	S9510	Protriptyline hydrochloride	400 uM	1.33333		Cl.CNCCCC1C2=C(C=CC=C2)C=CC3=C1C=CC=C3	C19H22ClN	299.838	0.0426	0.3	4.24
3931	F04	Experimental	Selleck Chemicals	S9510	Protriptyline hydrochloride	80 uM	0.266667		Cl.CNCCCC1C2=C(C=CC=C2)C=CC3=C1C=CC=C3	C19H22ClN	299.838	0.0458	0.47	5.81
3931	F05	Experimental	MedChem Express	HY-76542	Ergocalciferol	400 uM	1.33333		CC(C)C(C)C=CC(C)C1CCC2C1(CCCC2=CC=C3CC(CCC3=C)O)C	C28H44O	396.648	0.0405	0.18	3.17
3931	F06	Experimental	MedChem Express	HY-76542	Ergocalciferol	80 uM	0.266667		CC(C)C(C)C=CC(C)C1CCC2C1(CCCC2=CC=C3CC(CCC3=C)O)C	C28H44O	396.648	0.0346	-0.16	0.33
3931	F07	Experimental	MedChem Express	HY-16787	ICA 121431	400 uM	1.33333		C1=CC=C(C=C1)C(C2=CC=CC=C2)C(=O)NC3=CC=C(C=C3)S(=O)(=O)NC4=NC=CS4	C23H19N3O3S2	449.545	0.0479	0.59	6.85
3931	F08	Experimental	MedChem Express	HY-16787	ICA 121431	80 uM	0.266667		C1=CC=C(C=C1)C(C2=CC=CC=C2)C(=O)NC3=CC=C(C=C3)S(=O)(=O)NC4=NC=CS4	C23H19N3O3S2	449.545	0.0409	0.19	3.44
3931	F09	Experimental	MedChem Express	HY-B1109	N-acetylprocainamide	400 uM	1.33333		CCN(CC)CCNC(=O)C1=CC=C(C=C1)NC(=O)C	C15H23N3O2	277.362	0.0314	-0.33	-1.27
3931	F10	Experimental	MedChem Express	HY-B1109	N-acetylprocainamide	80 uM	0.266667		CCN(CC)CCNC(=O)C1=CC=C(C=C1)NC(=O)C	C15H23N3O2	277.362	0.0455	0.46	5.62
3931	F11	Experimental	MedChem Express	HY-A0084	Procainamide hydrochloride	400 uM	1.33333		O=C(NCCN(CC)CC)C1=CC=C(N)C=C1.[H]Cl	C13H22ClN3O	271.786	0.0432	0.32	4.55
3931	F12	Experimental	MedChem Express	HY-A0084	Procainamide hydrochloride	80 uM	0.266667		O=C(NCCN(CC)CC)C1=CC=C(N)C=C1.[H]Cl	C13H22ClN3O	271.786	0.0402	0.16	3.07
3931	F13	Experimental	MedChem Express	HY-B0561	Spironolactone	400 uM	1.33333		CC(=O)SC1CC2=CC(=O)CCC2(C3C1C4CCC5(C4(CC3)C)CCC(=O)O5)C	C24H32O4S	416.573	0.0353	-0.12	0.68
3931	F14	Experimental	MedChem Express	HY-B0561	Spironolactone	80 uM	0.266667		CC(=O)SC1CC2=CC(=O)CCC2(C3C1C4CCC5(C4(CC3)C)CCC(=O)O5)C	C24H32O4S	416.573	0.0374	0	1.67
3931	F15	Experimental	TargetMol	TWS0414	Cannabidiol	400 uM	1.33333		CCCCCC1=CC(=C(C(=C1)O)C2C=C(CCC2C(=C)C)C)O	C21H30O2	314.462	0.0396	0.11	2.8
3931	F16	Experimental	TargetMol	TWS0414	Cannabidiol	80 uM	0.266667		CCCCCC1=CC(=C(C(=C1)O)C2C=C(CCC2C(=C)C)C)O	C21H30O2	314.462	0.0391	0.1	2.52
3931	F17	Experimental	MedChem Express	HY-B1167	Ajmaline	400 uM	1.33333		CCC1C2CC3C4C5(CC(C2C5O)N3C1O)C6=CC=CC=C6N4C	C20H26N2O2	326.433	0.0352	-0.14	0.63
3931	F18	Experimental	MedChem Express	HY-B1167	Ajmaline	80 uM	0.266667		CCC1C2CC3C4C5(CC(C2C5O)N3C1O)C6=CC=CC=C6N4C	C20H26N2O2	326.433	0.0374	0	1.65
3931	F19	Experimental	MedChem Express	HY-B0274	Chlorprothixene	400 uM	1.33333		CN(C)CCC=C1C2=CC=CC=C2SC3=C1C=C(C=C3)Cl	C18H18ClNS	315.86	0.0346	-0.16	0.28
3931	F20	Experimental	MedChem Express	HY-B0274	Chlorprothixene	80 uM	0.266667		CN(C)CCC=C1C2=CC=CC=C2SC3=C1C=C(C=C3)Cl	C18H18ClNS	315.86	0.0344	-0.18	0.27
3931	F21	Experimental	Tocris	2815	Valproic acid	400 uM	1.33333		CCCC(CCC)C(=O)[O-].[Na+]	C8H15NaO2	166.193	0.0322	-0.29	-0.9
3931	F22	Experimental	Tocris	2815	Valproic acid	80 uM	0.266667		CCCC(CCC)C(=O)[O-].[Na+]	C8H15NaO2	166.193	0.0321	-0.3	-0.92
3931	F23	Empty						Assay Positive Control				0.2339	10.91	98.54
3931	F24	Empty						Assay Positive Control				0.2398	11.34	101.19
3931	G01	Empty										0.0318	-0.32	-1.03
3931	G02	Empty										0.0379	0.03	1.96
3931	G03	Experimental	Selleck Chemicals	S4734	Retigabine 2HCl	10 mM	33.3333		Cl.Cl.CCOC(=O)NC1=CC=C(NCC2=CC=C(F)C=C2)C=C1N	C16H20Cl2FN3O2	376.253	0.2377	11.2	100.25
3931	G04	Experimental	Selleck Chemicals	S4734	Retigabine 2HCl	2 mM	6.66667		Cl.Cl.CCOC(=O)NC1=CC=C(NCC2=CC=C(F)C=C2)C=C1N	C16H20Cl2FN3O2	376.253	0.221	10.24	92.08
3931	G05	Experimental	MedChem Express	HY-B2080A	Etidocaine	10 mM	33.3333		CCCN(CC)C(CC)C(=O)NC1=C(C=CC=C1C)C	C17H28N2O	276.417	0.0371	-0.01	1.54
3931	G06	Experimental	MedChem Express	HY-B2080A	Etidocaine	2 mM	6.66667		CCCN(CC)C(CC)C(=O)NC1=C(C=CC=C1C)C	C17H28N2O	276.417	0.0435	0.34	4.66
3931	G07	Experimental	MedChem Express	HY-126937	Ivermectin	10 mM	33.3333		CCC(C)C1C(CCC2(O1)CC3CC(O2)CC=C(C(C(C=CC=C4COC5C4(C(C=C(C5O)C)C(=O)O3)O)C)OC6CC(C(C(O6)C)OC7CC(C(C(O7)C)O)OC)OC)C)C	C48H74O14	875.093	0.0291	-0.47	-2.43
3931	G08	Experimental	MedChem Express	HY-126937	Ivermectin	2 mM	6.66667		CCC(C)C1C(CCC2(O1)CC3CC(O2)CC=C(C(C(C=CC=C4COC5C4(C(C=C(C5O)C)C(=O)O3)O)C)OC6CC(C(C(O6)C)OC7CC(C(C(O7)C)O)OC)OC)C)C	C48H74O14	875.093	0.0404	0.16	3.17
3931	G09	Experimental	MedChem Express	HY-B1199	Nialamide	10 mM	33.3333		C1=CC=C(C=C1)CNC(=O)CCNNC(=O)C2=CC=NC=C2	C16H18N4O2	298.34	0.036	-0.07	0.95
3931	G10	Experimental	MedChem Express	HY-B1199	Nialamide	2 mM	6.66667		C1=CC=C(C=C1)CNC(=O)CCNNC(=O)C2=CC=NC=C2	C16H18N4O2	298.34	0.0381	0.04	2.01
3931	G11	Experimental	MedChem Express	HY-103118	PU-02	10 mM	33.3333		C12=NC=NC(SCC3=C(C=CC=C4)C4=CC=C3)=C1NC=N2	C16H12N4S	292.358	0.0397	0.12	2.83
3931	G12	Experimental	MedChem Express	HY-103118	PU-02	2 mM	6.66667		C12=NC=NC(SCC3=C(C=CC=C4)C4=CC=C3)=C1NC=N2	C16H12N4S	292.358	0.0434	0.33	4.61
3931	G13	Experimental	MedChem Express	HY-B1798A	Tocainide hydrochloride	10 mM	33.3333		CC(N)C(NC1=C(C)C=CC=C1C)=O.[H]Cl	C11H17ClN2O	228.718	0.0344	-0.17	0.2
3931	G14	Experimental	MedChem Express	HY-B1798A	Tocainide hydrochloride	2 mM	6.66667		CC(N)C(NC1=C(C)C=CC=C1C)=O.[H]Cl	C11H17ClN2O	228.718	0.0382	0.04	2.1
3931	G15	Experimental	MedChem Express	HY-B0963	Cloxyquin	10 mM	33.3333		C1=CC2=C(C=CC(=C2N=C1)O)Cl	C9H6ClNO	179.603	0.0469	0.53	6.35
3931	G16	Experimental	MedChem Express	HY-B0963	Cloxyquin	2 mM	6.66667		C1=CC2=C(C=CC(=C2N=C1)O)Cl	C9H6ClNO	179.603	0.0401	0.16	2.99
3931	G17	Experimental	MedChem Express	HY-B1039	Ambroxol	10 mM	33.3333		C1CC(CCC1NCC2=C(C(=CC(=C2)Br)Br)N)O	C13H18Br2N2O	378.103	0.0288	-0.48	-2.57
3931	G18	Experimental	MedChem Express	HY-B1039	Ambroxol	2 mM	6.66667		C1CC(CCC1NCC2=C(C(=CC(=C2)Br)Br)N)O	C13H18Br2N2O	378.103	0.0303	-0.39	-1.81
3931	G19	Experimental	MedChem Express	HY-B1090	Cinnarizine	10 mM	33.3333		C1CN(CCN1CC=CC2=CC=CC=C2)C(C3=CC=CC=C3)C4=CC=CC=C4	C26H28N2	368.514	0.0344	-0.17	0.22
3931	G20	Experimental	MedChem Express	HY-B1090	Cinnarizine	2 mM	6.66667		C1CN(CCN1CC=CC2=CC=CC=C2)C(C3=CC=CC=C3)C4=CC=CC=C4	C26H28N2	368.514	0.0376	0	1.78
3931	G21	Experimental	Bean Lab, HMS	Bean Lab-2	NNCB-2	10 mM	33.3333		C([C@H](CSCC1CCCC1)NCCC(C)(C)C)(=O)NCc2:c:c:c(OC):c:c:2	C23H38N2O2S	406.625	0.0244	-0.72	-4.74
3931	G22	Experimental	Bean Lab, HMS	Bean Lab-2	NNCB-2	2 mM	6.66667		C([C@H](CSCC1CCCC1)NCCC(C)(C)C)(=O)NCc2:c:c:c(OC):c:c:2	C23H38N2O2S	406.625	0.0339	-0.2	-0.05
3931	G23	Empty						Assay Positive Control				0.2358	11.09	99.27
3931	G24	Empty						Assay Positive Control				0.2432	11.52	102.89
3931	H01	Empty										0.033	-0.25	-0.48
3931	H02	Empty										0.0331	-0.24	-0.42
3931	H03	Experimental	Selleck Chemicals	S4734	Retigabine 2HCl	400 uM	1.33333		Cl.Cl.CCOC(=O)NC1=CC=C(NCC2=CC=C(F)C=C2)C=C1N	C16H20Cl2FN3O2	376.253	0.1249	4.86	44.82
3931	H04	Experimental	Selleck Chemicals	S4734	Retigabine 2HCl	80 uM	0.266667		Cl.Cl.CCOC(=O)NC1=CC=C(NCC2=CC=C(F)C=C2)C=C1N	C16H20Cl2FN3O2	376.253	0.0664	1.62	15.92
3931	H05	Experimental	MedChem Express	HY-B2080A	Etidocaine	400 uM	1.33333		CCCN(CC)C(CC)C(=O)NC1=C(C=CC=C1C)C	C17H28N2O	276.417	0.0399	0.15	2.88
3931	H06	Experimental	MedChem Express	HY-B2080A	Etidocaine	80 uM	0.266667		CCCN(CC)C(CC)C(=O)NC1=C(C=CC=C1C)C	C17H28N2O	276.417	0.0437	0.35	4.8
3931	H07	Experimental	MedChem Express	HY-126937	Ivermectin	400 uM	1.33333		CCC(C)C1C(CCC2(O1)CC3CC(O2)CC=C(C(C(C=CC=C4COC5C4(C(C=C(C5O)C)C(=O)O3)O)C)OC6CC(C(C(O6)C)OC7CC(C(C(O7)C)O)OC)OC)C)C	C48H74O14	875.093	0.042	0.26	3.9
3931	H08	Experimental	MedChem Express	HY-126937	Ivermectin	80 uM	0.266667		CCC(C)C1C(CCC2(O1)CC3CC(O2)CC=C(C(C(C=CC=C4COC5C4(C(C=C(C5O)C)C(=O)O3)O)C)OC6CC(C(C(O6)C)OC7CC(C(C(O7)C)O)OC)OC)C)C	C48H74O14	875.093	0.0417	0.24	3.81
3931	H09	Experimental	MedChem Express	HY-B1199	Nialamide	400 uM	1.33333		C1=CC=C(C=C1)CNC(=O)CCNNC(=O)C2=CC=NC=C2	C16H18N4O2	298.34	0.0382	0.03	2.14
3931	H10	Experimental	MedChem Express	HY-B1199	Nialamide	80 uM	0.266667		C1=CC=C(C=C1)CNC(=O)CCNNC(=O)C2=CC=NC=C2	C16H18N4O2	298.34	0.039	0.09	2.49
3931	H11	Experimental	MedChem Express	HY-103118	PU-02	400 uM	1.33333		C12=NC=NC(SCC3=C(C=CC=C4)C4=CC=C3)=C1NC=N2	C16H12N4S	292.358	0.038	0.02	2
3931	H12	Experimental	MedChem Express	HY-103118	PU-02	80 uM	0.266667		C12=NC=NC(SCC3=C(C=CC=C4)C4=CC=C3)=C1NC=N2	C16H12N4S	292.358	0.0404	0.17	3.14
3931	H13	Experimental	MedChem Express	HY-B1798A	Tocainide hydrochloride	400 uM	1.33333		CC(N)C(NC1=C(C)C=CC=C1C)=O.[H]Cl	C11H17ClN2O	228.718	0.0385	0.05	2.25
3931	H14	Experimental	MedChem Express	HY-B1798A	Tocainide hydrochloride	80 uM	0.266667		CC(N)C(NC1=C(C)C=CC=C1C)=O.[H]Cl	C11H17ClN2O	228.718	0.0351	-0.14	0.57
3931	H15	Experimental	MedChem Express	HY-B0963	Cloxyquin	400 uM	1.33333		C1=CC2=C(C=CC(=C2N=C1)O)Cl	C9H6ClNO	179.603	0.0371	-0.02	1.54
3931	H16	Experimental	MedChem Express	HY-B0963	Cloxyquin	80 uM	0.266667		C1=CC2=C(C=CC(=C2N=C1)O)Cl	C9H6ClNO	179.603	0.0366	-0.04	1.24
3931	H17	Experimental	MedChem Express	HY-B1039	Ambroxol	400 uM	1.33333		C1CC(CCC1NCC2=C(C(=CC(=C2)Br)Br)N)O	C13H18Br2N2O	378.103	0.041	0.19	3.49
3931	H18	Experimental	MedChem Express	HY-B1039	Ambroxol	80 uM	0.266667		C1CC(CCC1NCC2=C(C(=CC(=C2)Br)Br)N)O	C13H18Br2N2O	378.103	0.0359	-0.08	0.94
3931	H19	Experimental	MedChem Express	HY-B1090	Cinnarizine	400 uM	1.33333		C1CN(CCN1CC=CC2=CC=CC=C2)C(C3=CC=CC=C3)C4=CC=CC=C4	C26H28N2	368.514	0.0351	-0.14	0.57
3931	H20	Experimental	MedChem Express	HY-B1090	Cinnarizine	80 uM	0.266667		C1CN(CCN1CC=CC2=CC=CC=C2)C(C3=CC=CC=C3)C4=CC=CC=C4	C26H28N2	368.514	0.0373	-0.01	1.63
3931	H21	Experimental	Bean Lab, HMS	Bean Lab-2	NNCB-2	400 uM	1.33333		C([C@H](CSCC1CCCC1)NCCC(C)(C)C)(=O)NCc2:c:c:c(OC):c:c:2	C23H38N2O2S	406.625	0.0376	0	1.78
3931	H22	Experimental	Bean Lab, HMS	Bean Lab-2	NNCB-2	80 uM	0.266667		C([C@H](CSCC1CCCC1)NCCC(C)(C)C)(=O)NCc2:c:c:c(OC):c:c:2	C23H38N2O2S	406.625	0.0325	-0.28	-0.74
3931	H23	Empty						Assay Positive Control				0.2319	10.87	97.38
3931	H24	Empty						Assay Positive Control				0.2406	11.37	101.61
3931	I01	Empty										0.034	-0.2	0.02
3931	I02	Empty										0.0367	-0.05	1.34
3931	I03	Experimental	Selleck Chemicals	S1614	Riluzole	10 mM	33.3333		NC1=NC2=C(S1)C=C(OC(F)(F)F)C=C2	C8H5F3N2OS	234.198	0.0351	-0.12	0.55
3931	I04	Experimental	Selleck Chemicals	S1614	Riluzole	2 mM	6.66667		NC1=NC2=C(S1)C=C(OC(F)(F)F)C=C2	C8H5F3N2OS	234.198	0.0388	0.07	2.4
3931	I05	Experimental	MedChem Express	HY-W010950A	Flecainide	10 mM	33.3333		C1CCNC(C1)CNC(=O)C2=C(C=CC(=C2)OCC(F)(F)F)OCC(F)(F)F	C17H20F6N2O3	414.343	0.0305	-0.38	-1.74
3931	I06	Experimental	MedChem Express	HY-W010950A	Flecainide	2 mM	6.66667		C1CCNC(C1)CNC(=O)C2=C(C=CC(=C2)OCC(F)(F)F)OCC(F)(F)F	C17H20F6N2O3	414.343	0.0379	0.03	1.94
3931	I07	Experimental	MedChem Express	HY-B0347	Lacidipine	10 mM	33.3333		CCOC(=O)C1=C(NC(=C(C1C2=CC=CC=C2C=CC(=O)OC(C)(C)C)C(=O)OCC)C)C	C26H33NO6	455.543	0.0376	0.01	1.79
3931	I08	Experimental	MedChem Express	HY-B0347	Lacidipine	2 mM	6.66667		CCOC(=O)C1=C(NC(=C(C1C2=CC=CC=C2C=CC(=O)OC(C)(C)C)C(=O)OCC)C)C	C26H33NO6	455.543	0.0367	-0.04	1.32
3931	I09	Experimental	MedChem Express	HY-B1704A	Nisoxetine hydrochloride	10 mM	33.3333		CNCCC(OC1=CC=CC=C1OC)C2=CC=CC=C2.[H]Cl	C17H22ClNO2	307.815	0.0295	-0.44	-2.23
3931	I10	Experimental	MedChem Express	HY-B1704A	Nisoxetine hydrochloride	2 mM	6.66667		CNCCC(OC1=CC=CC=C1OC)C2=CC=CC=C2.[H]Cl	C17H22ClNO2	307.815	0.0331	-0.24	-0.44
3931	I11	Experimental	MedChem Express	HY-101437	Ralfinamide	10 mM	33.3333		CC(C(=O)N)NCC1=CC=C(C=C1)OCC2=CC=CC=C2F	C17H19FN2O2	302.343	0.0361	-0.08	1.06
3931	I12	Experimental	MedChem Express	HY-101437	Ralfinamide	2 mM	6.66667		CC(C(=O)N)NCC1=CC=C(C=C1)OCC2=CC=CC=C2F	C17H19FN2O2	302.343	0.0404	0.16	3.14
3931	I13	Experimental	MedChem Express	HY-B0122	Topiramate	10 mM	33.3333		CC1(OC2COC3(C(C2O1)OC(O3)(C)C)COS(=O)(=O)N)C	C12H21NO8S	339.362	0.0398	0.13	2.85
3931	I14	Experimental	MedChem Express	HY-B0122	Topiramate	2 mM	6.66667		CC1(OC2COC3(C(C2O1)OC(O3)(C)C)COS(=O)(=O)N)C	C12H21NO8S	339.362	0.0414	0.21	3.65
3931	I15	Experimental	MedChem Express	HY-120348	ML67-33	10 mM	33.3333		CC1(C2=CC(Cl)=CC=C2N(C3=CC=C(C=C13)Cl)CCC4=NN=NN4)C	C18H17Cl2N5	374.267	0.0304	-0.4	-1.75
3931	I16	Experimental	MedChem Express	HY-120348	ML67-33	2 mM	6.66667		CC1(C2=CC(Cl)=CC=C2N(C3=CC=C(C=C13)Cl)CCC4=NN=NN4)C	C18H17Cl2N5	374.267	0.0267	-0.6	-3.56
3931	I17	Experimental	MedChem Express	HY-14946	Amifampridine	10 mM	33.3333		C1=CN=CC(=C1N)N	C5H7N3	109.129	0.0402	0.15	3.08
3931	I18	Experimental	MedChem Express	HY-14946	Amifampridine	2 mM	6.66667		C1=CN=CC(=C1N)N	C5H7N3	109.129	0.032	-0.29	-0.98
3931	I19	Experimental	MedChem Express	HY-107675	Desformylflustrabromine	10 mM	33.3333		CC(C)(C=C)C1=C(C2=C(N1)C=C(C=C2)Br)CCNC	C16H21BrN2	321.255	0.0229	-0.81	-5.47
3931	I20	Experimental	MedChem Express	HY-107675	Desformylflustrabromine	2 mM	6.66667		CC(C)(C=C)C1=C(C2=C(N1)C=C(C=C2)Br)CCNC	C16H21BrN2	321.255	0.0323	-0.29	-0.8
3931	I21	Experimental	Bean Lab, HMS	Bean Lab-1	CNCB-2	10 mM	33.3333		[N+](C)(C)(CCC(C)(C)C)[C@@H](CSCC1CCCC1)C(NCc2:c:c:c(OC):c:c:2)=O	C25H43N2O2S	435.686	0.0326	-0.28	-0.64
3931	I22	Experimental	Bean Lab, HMS	Bean Lab-1	CNCB-2	2 mM	6.66667		[N+](C)(C)(CCC(C)(C)C)[C@@H](CSCC1CCCC1)C(NCc2:c:c:c(OC):c:c:2)=O	C25H43N2O2S	435.686	0.0317	-0.32	-1.1
3931	I23	Empty						Assay Negative Control				0.0308	-0.36	-1.59
3931	I24	Empty						Assay Negative Control				0.0341	-0.19	0.06
3931	J01	Empty										0.031	-0.35	-1.48
3931	J02	Empty										0.0368	-0.04	1.42
3931	J03	Experimental	Selleck Chemicals	S1614	Riluzole	400 uM	1.33333		NC1=NC2=C(S1)C=C(OC(F)(F)F)C=C2	C8H5F3N2OS	234.198	0.0399	0.15	2.9
3931	J04	Experimental	Selleck Chemicals	S1614	Riluzole	80 uM	0.266667		NC1=NC2=C(S1)C=C(OC(F)(F)F)C=C2	C8H5F3N2OS	234.198	0.0328	-0.25	-0.59
3931	J05	Experimental	MedChem Express	HY-W010950A	Flecainide	400 uM	1.33333		C1CCNC(C1)CNC(=O)C2=C(C=CC(=C2)OCC(F)(F)F)OCC(F)(F)F	C17H20F6N2O3	414.343	0.0373	0	1.63
3931	J06	Experimental	MedChem Express	HY-W010950A	Flecainide	80 uM	0.266667		C1CCNC(C1)CNC(=O)C2=C(C=CC(=C2)OCC(F)(F)F)OCC(F)(F)F	C17H20F6N2O3	414.343	0.0372	-0.01	1.56
3931	J07	Experimental	MedChem Express	HY-B0347	Lacidipine	400 uM	1.33333		CCOC(=O)C1=C(NC(=C(C1C2=CC=CC=C2C=CC(=O)OC(C)(C)C)C(=O)OCC)C)C	C26H33NO6	455.543	0.0376	0.01	1.79
3931	J08	Experimental	MedChem Express	HY-B0347	Lacidipine	80 uM	0.266667		CCOC(=O)C1=C(NC(=C(C1C2=CC=CC=C2C=CC(=O)OC(C)(C)C)C(=O)OCC)C)C	C26H33NO6	455.543	0.0418	0.24	3.82
3931	J09	Experimental	MedChem Express	HY-B1704A	Nisoxetine hydrochloride	400 uM	1.33333		CNCCC(OC1=CC=CC=C1OC)C2=CC=CC=C2.[H]Cl	C17H22ClNO2	307.815	0.0376	0.01	1.78
3931	J10	Experimental	MedChem Express	HY-B1704A	Nisoxetine hydrochloride	80 uM	0.266667		CNCCC(OC1=CC=CC=C1OC)C2=CC=CC=C2.[H]Cl	C17H22ClNO2	307.815	0.0387	0.07	2.33
3931	J11	Experimental	MedChem Express	HY-101437	Ralfinamide	400 uM	1.33333		CC(C(=O)N)NCC1=CC=C(C=C1)OCC2=CC=CC=C2F	C17H19FN2O2	302.343	0.0367	-0.04	1.35
3931	J12	Experimental	MedChem Express	HY-101437	Ralfinamide	80 uM	0.266667		CC(C(=O)N)NCC1=CC=C(C=C1)OCC2=CC=CC=C2F	C17H19FN2O2	302.343	0.0353	-0.13	0.7
3931	J13	Experimental	MedChem Express	HY-B0122	Topiramate	400 uM	1.33333		CC1(OC2COC3(C(C2O1)OC(O3)(C)C)COS(=O)(=O)N)C	C12H21NO8S	339.362	0.0388	0.07	2.41
3931	J14	Experimental	MedChem Express	HY-B0122	Topiramate	80 uM	0.266667		CC1(OC2COC3(C(C2O1)OC(O3)(C)C)COS(=O)(=O)N)C	C12H21NO8S	339.362	0.0391	0.08	2.52
3931	J15	Experimental	MedChem Express	HY-120348	ML67-33	400 uM	1.33333		CC1(C2=CC(Cl)=CC=C2N(C3=CC=C(C=C13)Cl)CCC4=NN=NN4)C	C18H17Cl2N5	374.267	0.0356	-0.09	0.81
3931	J16	Experimental	MedChem Express	HY-120348	ML67-33	80 uM	0.266667		CC1(C2=CC(Cl)=CC=C2N(C3=CC=C(C=C13)Cl)CCC4=NN=NN4)C	C18H17Cl2N5	374.267	0.0389	0.09	2.38
3931	J17	Experimental	MedChem Express	HY-14946	Amifampridine	400 uM	1.33333		C1=CN=CC(=C1N)N	C5H7N3	109.129	0.0392	0.09	2.59
3931	J18	Experimental	MedChem Express	HY-14946	Amifampridine	80 uM	0.266667		C1=CN=CC(=C1N)N	C5H7N3	109.129	0.0407	0.18	3.31
3931	J19	Experimental	MedChem Express	HY-107675	Desformylflustrabromine	400 uM	1.33333		CC(C)(C=C)C1=C(C2=C(N1)C=C(C=C2)Br)CCNC	C16H21BrN2	321.255	0.0347	-0.16	0.35
3931	J20	Experimental	MedChem Express	HY-107675	Desformylflustrabromine	80 uM	0.266667		CC(C)(C=C)C1=C(C2=C(N1)C=C(C=C2)Br)CCNC	C16H21BrN2	321.255	0.0395	0.1	2.76
3931	J21	Experimental	Bean Lab, HMS	Bean Lab-1	CNCB-2	400 uM	1.33333		[N+](C)(C)(CCC(C)(C)C)[C@@H](CSCC1CCCC1)C(NCc2:c:c:c(OC):c:c:2)=O	C25H43N2O2S	435.686	0.036	-0.09	1
3931	J22	Experimental	Bean Lab, HMS	Bean Lab-1	CNCB-2	80 uM	0.266667		[N+](C)(C)(CCC(C)(C)C)[C@@H](CSCC1CCCC1)C(NCc2:c:c:c(OC):c:c:2)=O	C25H43N2O2S	435.686	0.032	-0.3	-1
3931	J23	Empty						Assay Negative Control				0.0378	0.02	1.92
3931	J24	Empty						Assay Negative Control				0.0337	-0.21	-0.13
3931	K01	Empty										0.034	-0.19	0.03
3931	K02	Empty										0.0345	-0.17	0.27
3931	K03	Experimental	Selleck Chemicals	S2573	Tetracaine HCl	10 mM	33.3333		Cl.CCCCNC1=CC=C(C=C1)C(=O)OCCN(C)C	C15H25ClN2O2	300.824	0.0282	-0.51	-2.85
3931	K04	Experimental	Selleck Chemicals	S2573	Tetracaine HCl	2 mM	6.66667		Cl.CCCCNC1=CC=C(C=C1)C(=O)OCCN(C)C	C15H25ClN2O2	300.824	0.0342	-0.18	0.11
3931	K05	Experimental	MedChem Express	HY-B1655	Fluspirilene	10 mM	33.3333		C1CN(CCC12C(=O)NCN2C3=CC=CC=C3)CCCC(C4=CC=C(C=C4)F)C5=CC=C(C=C5)F	C29H31F2N3O	475.573	0.0166	-1.16	-8.55
3931	K06	Experimental	MedChem Express	HY-B1655	Fluspirilene	2 mM	6.66667		C1CN(CCC12C(=O)NCN2C3=CC=CC=C3)CCCC(C4=CC=C(C=C4)F)C5=CC=C(C=C5)F	C29H31F2N3O	475.573	0.0309	-0.37	-1.53
3931	K07	Experimental	MedChem Express	HY-13666	Levamisole hydrochloride	10 mM	33.3333		[H]Cl.C12=N[C@@H](C3=CC=CC=C3)CN1CCS2	C11H13ClN2S	240.752	0.0404	0.16	3.14
3931	K08	Experimental	MedChem Express	HY-13666	Levamisole hydrochloride	2 mM	6.66667		[H]Cl.C12=N[C@@H](C3=CC=CC=C3)CN1CCS2	C11H13ClN2S	240.752	0.0427	0.29	4.32
3931	K09	Experimental	MedChem Express	HY-W005637	Orthocaine	10 mM	33.3333		COC(=O)C1=CC(=C(C=C1)O)N	C8H9NO3	167.162	0.0404	0.16	3.16
3931	K10	Experimental	MedChem Express	HY-W005637	Orthocaine	2 mM	6.66667		COC(=O)C1=CC(=C(C=C1)O)N	C8H9NO3	167.162	0.0318	-0.31	-1.05
3931	K11	Experimental	MedChem Express	HY-B1755	Risocaine	10 mM	33.3333		CCCOC(=O)C1=CC=C(C=C1)N	C10H13NO2	179.216	0.0379	0.03	1.95
3931	K12	Experimental	MedChem Express	HY-B1755	Risocaine	2 mM	6.66667		CCCOC(=O)C1=CC=C(C=C1)N	C10H13NO2	179.216	0.0337	-0.21	-0.1
3931	K13	Experimental	MedChem Express	HY-111828	TTA-A2	10 mM	33.3333		CC(C1=NC=C(C=C1)OCC(F)(F)F)NC(=O)CC2=CC=C(C=C2)C3CC3	C20H21F3N2O2	378.388	0.0465	0.5	6.18
3931	K14	Experimental	MedChem Express	HY-111828	TTA-A2	2 mM	6.66667		CC(C1=NC=C(C=C1)OCC(F)(F)F)NC(=O)CC2=CC=C(C=C2)C3CC3	C20H21F3N2O2	378.388	0.0363	-0.07	1.13
3931	K15	Experimental	Tocris	2976	A-803467	10 mM	33.3333		ClC(C=C2)=CC=C2C1=CC=C(C(NC3=CC(OC)=CC(OC)=C3)=O)O1	C19H16ClNO4	357.788	0.0391	0.1	2.53
3931	K16	Experimental	Tocris	2976	A-803467	2 mM	6.66667		ClC(C=C2)=CC=C2C1=CC=C(C(NC3=CC(OC)=CC(OC)=C3)=O)O1	C19H16ClNO4	357.788	0.0363	-0.07	1.15
3931	K17	Experimental	MedChem Express	HY-14188	Amiodarone hydrochloride	10 mM	33.3333		CCCCC1=C(C(C2=CC(I)=C(OCCN(CC)CC)C(I)=C2)=O)C3=C(O1)C=CC=C3.Cl	C25H30ClI2NO3	681.773	0.0442	0.37	5.01
3931	K18	Experimental	MedChem Express	HY-14188	Amiodarone hydrochloride	2 mM	6.66667		CCCCC1=C(C(C2=CC(I)=C(OCCN(CC)CC)C(I)=C2)=O)C3=C(O1)C=CC=C3.Cl	C25H30ClI2NO3	681.773	0.0362	-0.07	1.09
3931	K19	Experimental	MedChem Express	HY-W039454	Dichlorobenzyl alcohol	10 mM	33.3333		CC(C)(C)[Si](C)(C)OCC1=CC(=CC(=C1)Cl)Cl	C13H20Cl2OSi	291.289	0.0324	-0.28	-0.77
3931	K20	Experimental	MedChem Express	HY-W039454	Dichlorobenzyl alcohol	2 mM	6.66667		CC(C)(C)[Si](C)(C)OCC1=CC(=CC(=C1)Cl)Cl	C13H20Cl2OSi	291.289	0.033	-0.25	-0.45
3931	K21	Empty										0.0319	-0.31	-1
3931	K22	Empty										0.0401	0.13	3.09
3931	K23	Empty						Assay Negative Control				0.0315	-0.33	-1.22
3931	K24	Empty						Assay Negative Control				0.032	-0.3	-0.94
3931	L01	Empty										0.0349	-0.13	0.45
3931	L02	Empty										0.0325	-0.27	-0.76
3931	L03	Experimental	Selleck Chemicals	S2573	Tetracaine HCl	400 uM	1.33333		Cl.CCCCNC1=CC=C(C=C1)C(=O)OCCN(C)C	C15H25ClN2O2	300.824	0.0391	0.09	2.51
3931	L04	Experimental	Selleck Chemicals	S2573	Tetracaine HCl	80 uM	0.266667		Cl.CCCCNC1=CC=C(C=C1)C(=O)OCCN(C)C	C15H25ClN2O2	300.824	0.0357	-0.1	0.82
3931	L05	Experimental	MedChem Express	HY-B1655	Fluspirilene	400 uM	1.33333		C1CN(CCC12C(=O)NCN2C3=CC=CC=C3)CCCC(C4=CC=C(C=C4)F)C5=CC=C(C=C5)F	C29H31F2N3O	475.573	0.0397	0.13	2.8
3931	L06	Experimental	MedChem Express	HY-B1655	Fluspirilene	80 uM	0.266667		C1CN(CCC12C(=O)NCN2C3=CC=CC=C3)CCCC(C4=CC=C(C=C4)F)C5=CC=C(C=C5)F	C29H31F2N3O	475.573	0.0363	-0.05	1.11
3931	L07	Experimental	MedChem Express	HY-13666	Levamisole hydrochloride	400 uM	1.33333		[H]Cl.C12=N[C@@H](C3=CC=CC=C3)CN1CCS2	C11H13ClN2S	240.752	0.0407	0.18	3.33
3931	L08	Experimental	MedChem Express	HY-13666	Levamisole hydrochloride	80 uM	0.266667		[H]Cl.C12=N[C@@H](C3=CC=CC=C3)CN1CCS2	C11H13ClN2S	240.752	0.0398	0.13	2.87
3931	L09	Experimental	MedChem Express	HY-W005637	Orthocaine	400 uM	1.33333		COC(=O)C1=CC(=C(C=C1)O)N	C8H9NO3	167.162	0.0333	-0.24	-0.31
3931	L10	Experimental	MedChem Express	HY-W005637	Orthocaine	80 uM	0.266667		COC(=O)C1=CC(=C(C=C1)O)N	C8H9NO3	167.162	0.037	-0.03	1.53
3931	L11	Experimental	MedChem Express	HY-B1755	Risocaine	400 uM	1.33333		CCCOC(=O)C1=CC=C(C=C1)N	C10H13NO2	179.216	0.0388	0.07	2.41
3931	L12	Experimental	MedChem Express	HY-B1755	Risocaine	80 uM	0.266667		CCCOC(=O)C1=CC=C(C=C1)N	C10H13NO2	179.216	0.0417	0.24	3.81
3931	L13	Experimental	MedChem Express	HY-111828	TTA-A2	400 uM	1.33333		CC(C1=NC=C(C=C1)OCC(F)(F)F)NC(=O)CC2=CC=C(C=C2)C3CC3	C20H21F3N2O2	378.388	0.0357	-0.11	0.88
3931	L14	Experimental	MedChem Express	HY-111828	TTA-A2	80 uM	0.266667		CC(C1=NC=C(C=C1)OCC(F)(F)F)NC(=O)CC2=CC=C(C=C2)C3CC3	C20H21F3N2O2	378.388	0.0381	0.03	2.03
3931	L15	Experimental	Tocris	2976	A-803467	400 uM	1.33333		ClC(C=C2)=CC=C2C1=CC=C(C(NC3=CC(OC)=CC(OC)=C3)=O)O1	C19H16ClNO4	357.788	0.0395	0.11	2.76
3931	L16	Experimental	Tocris	2976	A-803467	80 uM	0.266667		ClC(C=C2)=CC=C2C1=CC=C(C(NC3=CC(OC)=CC(OC)=C3)=O)O1	C19H16ClNO4	357.788	0.0352	-0.11	0.58
3931	L17	Experimental	MedChem Express	HY-14188	Amiodarone hydrochloride	400 uM	1.33333		CCCCC1=C(C(C2=CC(I)=C(OCCN(CC)CC)C(I)=C2)=O)C3=C(O1)C=CC=C3.Cl	C25H30ClI2NO3	681.773	0.0421	0.26	4.01
3931	L18	Experimental	MedChem Express	HY-14188	Amiodarone hydrochloride	80 uM	0.266667		CCCCC1=C(C(C2=CC(I)=C(OCCN(CC)CC)C(I)=C2)=O)C3=C(O1)C=CC=C3.Cl	C25H30ClI2NO3	681.773	0.0344	-0.16	0.18
3931	L19	Experimental	MedChem Express	HY-W039454	Dichlorobenzyl alcohol	400 uM	1.33333		CC(C)(C)[Si](C)(C)OCC1=CC(=CC(=C1)Cl)Cl	C13H20Cl2OSi	291.289	0.0361	-0.08	1.05
3931	L20	Experimental	MedChem Express	HY-W039454	Dichlorobenzyl alcohol	80 uM	0.266667		CC(C)(C)[Si](C)(C)OCC1=CC(=CC(=C1)Cl)Cl	C13H20Cl2OSi	291.289	0.0378	0.02	1.9
3931	L21	Empty										0.0312	-0.35	-1.36
3931	L22	Empty										0.0343	-0.19	0.17
3931	L23	Empty						Assay Negative Control				0.0385	0.05	2.22
3931	L24	Empty						Assay Negative Control				0.0355	-0.11	0.79
3931	M01	Empty										0.0396	0.11	2.8
3931	M02	Empty										0.0352	-0.13	0.6
3931	M03	Experimental	Selleck Chemicals	S5563	Thioridazine hydrochloride	10 mM	33.3333		Cl.CSC1=CC2=C(SC3=CC=CC=C3N2CCC4CCCCN4C)C=C1	C21H27ClN2S2	407.035	0.0046	-1.84	-14.44
3931	M04	Experimental	Selleck Chemicals	S5563	Thioridazine hydrochloride	2 mM	6.66667		Cl.CSC1=CC2=C(SC3=CC=CC=C3N2CCC4CCCCN4C)C=C1	C21H27ClN2S2	407.035	0.0242	-0.73	-4.86
3931	M05	Experimental	MedChem Express	HY-B0103A	Fluvoxamine maleate	10 mM	33.3333		O=C(O)/C=C\C(O)=O.FC(C1=CC=C(/C(CCCCOC)=N/OCCN)C=C1)(F)F	C19H25F3N2O6	434.407	0.0293	-0.45	-2.34
3931	M06	Experimental	MedChem Express	HY-B0103A	Fluvoxamine maleate	2 mM	6.66667		O=C(O)/C=C\C(O)=O.FC(C1=CC=C(/C(CCCCOC)=N/OCCN)C=C1)(F)F	C19H25F3N2O6	434.407	0.0411	0.21	3.52
3931	M07	Experimental	MedChem Express	HY-B0106	Levetiracetam	10 mM	33.3333		CCC(C(=O)N)N1CCCC1=O	C8H14N2O2	170.209	0.0348	-0.14	0.37
3931	M08	Experimental	MedChem Express	HY-B0106	Levetiracetam	2 mM	6.66667		CCC(C(=O)N)N1CCCC1=O	C8H14N2O2	170.209	0.0408	0.18	3.39
3931	M09	Experimental	MedChem Express	HY-12811	PF-04856264	10 mM	33.3333		CN1C(=CC=N1)C2=CC=CC=C2OC3=C(C=C(C=C3)S(=O)(=O)NC4=NC=CS4)C#N	C20H15N5O3S2	437.495	0.0285	-0.51	-2.68
3931	M10	Experimental	MedChem Express	HY-12811	PF-04856264	2 mM	6.66667		CN1C(=CC=N1)C2=CC=CC=C2OC3=C(C=C(C=C3)S(=O)(=O)NC4=NC=CS4)C#N	C20H15N5O3S2	437.495	0.0336	-0.22	-0.19
3931	M11	Experimental	MedChem Express	HY-10791	Ritanserin	10 mM	33.3333		CC1=C(C(=O)N2C=CSC2=N1)CCN3CCC(=C(C4=CC=C(C=C4)F)C5=CC=C(C=C5)F)CC3	C27H25F2N3OS	477.569	0.0153	-1.23	-9.19
3931	M12	Experimental	MedChem Express	HY-10791	Ritanserin	2 mM	6.66667		CC1=C(C(=O)N2C=CSC2=N1)CCN3CCC(=C(C4=CC=C(C=C4)F)C5=CC=C(C=C5)F)CC3	C27H25F2N3OS	477.569	0.0284	-0.5	-2.75
3931	M13	Experimental	MedChem Express	HY-121877	Valnoctamide	10 mM	33.3333		CCC(C)C(CC)C(=O)N	C8H17NO	143.227	0.0345	-0.17	0.27
3931	M14	Experimental	MedChem Express	HY-121877	Valnoctamide	2 mM	6.66667		CCC(C)C(CC)C(=O)N	C8H17NO	143.227	0.0373	-0.01	1.64
3931	M15	Experimental	MedChem Express	HY-B1751	Quinidine	10 mM	33.3333		C=C[C@H]1C[N@](CC[C@H]1C2)[C@@]2([H])[C@@H](O)C3=CC=NC4=CC=C(OC)C=C34	C20H24N2O2	324.417	0.0345	-0.16	0.26
3931	M16	Experimental	MedChem Express	HY-B1751	Quinidine	2 mM	6.66667		C=C[C@H]1C[N@](CC[C@H]1C2)[C@@]2([H])[C@@H](O)C3=CC=NC4=CC=C(OC)C=C34	C20H24N2O2	324.417	0.0356	-0.11	0.81
3931	M17	Experimental	MedChem Express	HY-B1185	Beclamide	10 mM	33.3333		C1=CC=C(C=C1)CNC(=O)CCCl	C10H12ClNO	197.661	0.0358	-0.1	0.93
3931	M18	Experimental	MedChem Express	HY-B1185	Beclamide	2 mM	6.66667		C1=CC=C(C=C1)CNC(=O)CCCl	C10H12ClNO	197.661	0.0398	0.14	2.86
3931	M19	Experimental	MedChem Express	HY-14656	Diltiazem hydrochloride	10 mM	33.3333		CN(C)CCN1C2=CC=CC=C2S[C@@H](C3=CC=C(OC)C=C3)[C@@H](OC(C)=O)C1=O.Cl	C22H27ClN2O4S	450.979	0.0359	-0.09	0.97
3931	M20	Experimental	MedChem Express	HY-14656	Diltiazem hydrochloride	2 mM	6.66667		CN(C)CCN1C2=CC=CC=C2S[C@@H](C3=CC=C(OC)C=C3)[C@@H](OC(C)=O)C1=O.Cl	C22H27ClN2O4S	450.979	0.0373	-0.01	1.67
3931	M21	Empty										0.036	-0.08	1
3931	M22	Empty										0.0303	-0.4	-1.83
3931	M23	Empty						Assay Negative Control				0.0351	-0.14	0.55
3931	M24	Empty						Assay Negative Control				0.036	-0.08	0.99
3931	N01	Empty										0.0331	-0.23	-0.45
3931	N02	Empty										0.039	0.09	2.48
3931	N03	Experimental	Selleck Chemicals	S5563	Thioridazine hydrochloride	400 uM	1.33333		Cl.CSC1=CC2=C(SC3=CC=CC=C3N2CCC4CCCCN4C)C=C1	C21H27ClN2S2	407.035	0.0392	0.11	2.55
3931	N04	Experimental	Selleck Chemicals	S5563	Thioridazine hydrochloride	80 uM	0.266667		Cl.CSC1=CC2=C(SC3=CC=CC=C3N2CCC4CCCCN4C)C=C1	C21H27ClN2S2	407.035	0.04	0.15	2.95
3931	N05	Experimental	MedChem Express	HY-B0103A	Fluvoxamine maleate	400 uM	1.33333		O=C(O)/C=C\C(O)=O.FC(C1=CC=C(/C(CCCCOC)=N/OCCN)C=C1)(F)F	C19H25F3N2O6	434.407	0.0411	0.21	3.51
3931	N06	Experimental	MedChem Express	HY-B0103A	Fluvoxamine maleate	80 uM	0.266667		O=C(O)/C=C\C(O)=O.FC(C1=CC=C(/C(CCCCOC)=N/OCCN)C=C1)(F)F	C19H25F3N2O6	434.407	0.0376	0.01	1.74
3931	N07	Experimental	MedChem Express	HY-B0106	Levetiracetam	400 uM	1.33333		CCC(C(=O)N)N1CCCC1=O	C8H14N2O2	170.209	0.0384	0.06	2.15
3931	N08	Experimental	MedChem Express	HY-B0106	Levetiracetam	80 uM	0.266667		CCC(C(=O)N)N1CCCC1=O	C8H14N2O2	170.209	0.037	-0.02	1.46
3931	N09	Experimental	MedChem Express	HY-12811	PF-04856264	400 uM	1.33333		CN1C(=CC=N1)C2=CC=CC=C2OC3=C(C=C(C=C3)S(=O)(=O)NC4=NC=CS4)C#N	C20H15N5O3S2	437.495	0.0378	0.02	1.9
3931	N10	Experimental	MedChem Express	HY-12811	PF-04856264	80 uM	0.266667		CN1C(=CC=N1)C2=CC=CC=C2OC3=C(C=C(C=C3)S(=O)(=O)NC4=NC=CS4)C#N	C20H15N5O3S2	437.495	0.0365	-0.05	1.22
3931	N11	Experimental	MedChem Express	HY-10791	Ritanserin	400 uM	1.33333		CC1=C(C(=O)N2C=CSC2=N1)CCN3CCC(=C(C4=CC=C(C=C4)F)C5=CC=C(C=C5)F)CC3	C27H25F2N3OS	477.569	0.0342	-0.18	0.1
3931	N12	Experimental	MedChem Express	HY-10791	Ritanserin	80 uM	0.266667		CC1=C(C(=O)N2C=CSC2=N1)CCN3CCC(=C(C4=CC=C(C=C4)F)C5=CC=C(C=C5)F)CC3	C27H25F2N3OS	477.569	0.0316	-0.33	-1.14
3931	N13	Experimental	MedChem Express	HY-121877	Valnoctamide	400 uM	1.33333		CCC(C)C(CC)C(=O)N	C8H17NO	143.227	0.0343	-0.18	0.15
3931	N14	Experimental	MedChem Express	HY-121877	Valnoctamide	80 uM	0.266667		CCC(C)C(CC)C(=O)N	C8H17NO	143.227	0.0339	-0.21	-0.03
3931	N15	Experimental	MedChem Express	HY-B1751	Quinidine	400 uM	1.33333		C=C[C@H]1C[N@](CC[C@H]1C2)[C@@]2([H])[C@@H](O)C3=CC=NC4=CC=C(OC)C=C34	C20H24N2O2	324.417	0.0341	-0.2	0.06
3931	N16	Experimental	MedChem Express	HY-B1751	Quinidine	80 uM	0.266667		C=C[C@H]1C[N@](CC[C@H]1C2)[C@@]2([H])[C@@H](O)C3=CC=NC4=CC=C(OC)C=C34	C20H24N2O2	324.417	0.0361	-0.08	1.09
3931	N17	Experimental	MedChem Express	HY-B1185	Beclamide	400 uM	1.33333		C1=CC=C(C=C1)CNC(=O)CCCl	C10H12ClNO	197.661	0.0355	-0.11	0.76
3931	N18	Experimental	MedChem Express	HY-B1185	Beclamide	80 uM	0.266667		C1=CC=C(C=C1)CNC(=O)CCCl	C10H12ClNO	197.661	0.0401	0.14	3
3931	N19	Experimental	MedChem Express	HY-14656	Diltiazem hydrochloride	400 uM	1.33333		CN(C)CCN1C2=CC=CC=C2S[C@@H](C3=CC=C(OC)C=C3)[C@@H](OC(C)=O)C1=O.Cl	C22H27ClN2O4S	450.979	0.0396	0.12	2.76
3931	N20	Experimental	MedChem Express	HY-14656	Diltiazem hydrochloride	80 uM	0.266667		CN(C)CCN1C2=CC=CC=C2S[C@@H](C3=CC=C(OC)C=C3)[C@@H](OC(C)=O)C1=O.Cl	C22H27ClN2O4S	450.979	0.0336	-0.22	-0.15
3931	N21	Empty										0.035	-0.14	0.48
3931	N22	Empty										0.0326	-0.27	-0.7
3931	N23	Empty						Assay Negative Control				0.0369	-0.03	1.42
3931	N24	Empty						Assay Negative Control				0.0319	-0.31	-1.05
3931	O01	Empty										0.032	-0.3	-0.97
3931	O02	Empty										0.033	-0.25	-0.51
3931	O03	Experimental	Selleck Chemicals	S3201	Trifluoperazine 2HCl	10 mM	33.3333		Cl.Cl.CN1CCN(CCCN2C3=C(SC4=CC=C(C=C24)C(F)(F)F)C=CC=C3)CC1	C21H26Cl2F3N3S	480.417	0.0124	-1.4	-10.61
3931	O04	Experimental	Selleck Chemicals	S3201	Trifluoperazine 2HCl	2 mM	6.66667		Cl.Cl.CN1CCN(CCCN2C3=C(SC4=CC=C(C=C24)C(F)(F)F)C=CC=C3)CC1	C21H26Cl2F3N3S	480.417	0.0284	-0.5	-2.78
3931	O05	Experimental	MedChem Express	HY-A0057	Gabapentin	10 mM	33.3333		C1CCC(CC1)(CC(=O)O)CN	C9H17NO2	171.237	0.0392	0.1	2.56
3931	O06	Experimental	MedChem Express	HY-A0057	Gabapentin	2 mM	6.66667		C1CCC(CC1)(CC(=O)O)CN	C9H17NO2	171.237	0.0346	-0.16	0.29
3931	O07	Experimental	MedChem Express	HY-Y1683	Levomenthol	10 mM	33.3333		CC1CCC(C(C1)O)C(C)C	C10H20O	156.265	0.0337	-0.21	-0.14
3931	O08	Experimental	MedChem Express	HY-Y1683	Levomenthol	2 mM	6.66667		CC1CCC(C(C1)O)C(C)C	C10H20O	156.265	0.034	-0.19	-0.01
3931	O09	Experimental	MedChem Express	HY-12883	PF-05089771	10 mM	33.3333		C1=CC(=C(C=C1Cl)C2=C(NN=C2)N)OC3=CC(=C(C=C3Cl)S(=O)(=O)NC4=CSC=N4)F	C18H12Cl2FN5O3S2	500.354	0.0261	-0.63	-3.88
3931	O10	Experimental	MedChem Express	HY-12883	PF-05089771	2 mM	6.66667		C1=CC(=C(C=C1Cl)C2=C(NN=C2)N)OC3=CC(=C(C=C3Cl)S(=O)(=O)NC4=CSC=N4)F	C18H12Cl2FN5O3S2	500.354	0.0323	-0.29	-0.84
3931	O11	Experimental	MedChem Express	HY-B0563C	Ropivacaine mesylate	10 mM	33.3333		O=C([C@H]1N(CCC)CCCC1)NC2=C(C)C=CC=C2C.CS(=O)(O)=O	C18H30N2O4S	370.507	0.0355	-0.11	0.76
3931	O12	Experimental	MedChem Express	HY-B0563C	Ropivacaine mesylate	2 mM	6.66667		O=C([C@H]1N(CCC)CCCC1)NC2=C(C)C=CC=C2C.CS(=O)(O)=O	C18H30N2O4S	370.507	0.0312	-0.34	-1.39
3931	O13	Experimental	MedChem Express	HY-12796A	Vixotrigine hydrochloride	10 mM	33.3333		O=C([C@H]1N[C@@H](C2=CC=C(OCC3=CC=CC=C3F)C=C2)CC1)N.[H]Cl	C18H20ClFN2O2	350.815	0.0331	-0.24	-0.41
3931	O14	Experimental	MedChem Express	HY-12796A	Vixotrigine hydrochloride	2 mM	6.66667		O=C([C@H]1N[C@@H](C2=CC=C(OCC3=CC=CC=C3F)C=C2)CC1)N.[H]Cl	C18H20ClFN2O2	350.815	0.0354	-0.11	0.73
3931	O15	Experimental	Tocris	2625	Zonisamide	10 mM	33.3333		NS(=O)(=O)CC1=NOC2=CC=CC=C12	C8H8N2O3S	212.226	0.0345	-0.17	0.3
3931	O16	Experimental	Tocris	2625	Zonisamide	2 mM	6.66667		NS(=O)(=O)CC1=NOC2=CC=CC=C12	C8H8N2O3S	212.226	0.0323	-0.29	-0.83
3931	O17	Experimental	MedChem Express	HY-B1448	Benidipine hydrochloride	10 mM	33.3333		O=C(C1=C(C)NC(C)=C(C(O[C@H]2CN(CC3=CC=CC=C3)CCC2)=O)[C@@H]1C4=CC=CC([N+]([O-])=O)=C4)OC.[H]Cl	C28H32ClN3O6	542.023	0.0282	-0.51	-2.84
3931	O18	Experimental	MedChem Express	HY-B1448	Benidipine hydrochloride	2 mM	6.66667		O=C(C1=C(C)NC(C)=C(C(O[C@H]2CN(CC3=CC=CC=C3)CCC2)=O)[C@@H]1C4=CC=CC([N+]([O-])=O)=C4)OC.[H]Cl	C28H32ClN3O6	542.023	0.0259	-0.65	-3.99
3931	O19	Experimental	MedChem Express	HY-B0232	Dofetilide	10 mM	33.3333		CN(CCC1=CC=C(C=C1)NS(=O)(=O)C)CCOC2=CC=C(C=C2)NS(=O)(=O)C	C19H27N3O5S2	441.565	0.0366	-0.04	1.31
3931	O20	Experimental	MedChem Express	HY-B0232	Dofetilide	2 mM	6.66667		CN(CCC1=CC=C(C=C1)NS(=O)(=O)C)CCOC2=CC=C(C=C2)NS(=O)(=O)C	C19H27N3O5S2	441.565	0.0305	-0.39	-1.72
3931	O21	Empty										0.031	-0.36	-1.45
3931	O22	Empty										0.0321	-0.3	-0.94
3931	O23	Empty						Assay Negative Control				0.0342	-0.18	0.11
3931	O24	Empty						Assay Negative Control				0.0322	-0.3	-0.82
3931	P01	Empty										0.0344	-0.18	0.22
3931	P02	Empty										0.0319	-0.31	-1.01
3931	P03	Experimental	Selleck Chemicals	S3201	Trifluoperazine 2HCl	400 uM	1.33333		Cl.Cl.CN1CCN(CCCN2C3=C(SC4=CC=C(C=C24)C(F)(F)F)C=CC=C3)CC1	C21H26Cl2F3N3S	480.417	0.0371	-0.02	1.52
3931	P04	Experimental	Selleck Chemicals	S3201	Trifluoperazine 2HCl	80 uM	0.266667		Cl.Cl.CN1CCN(CCCN2C3=C(SC4=CC=C(C=C24)C(F)(F)F)C=CC=C3)CC1	C21H26Cl2F3N3S	480.417	0.0354	-0.11	0.71
3931	P05	Experimental	MedChem Express	HY-A0057	Gabapentin	400 uM	1.33333		C1CCC(CC1)(CC(=O)O)CN	C9H17NO2	171.237	0.0364	-0.06	1.2
3931	P06	Experimental	MedChem Express	HY-A0057	Gabapentin	80 uM	0.266667		C1CCC(CC1)(CC(=O)O)CN	C9H17NO2	171.237	0.0362	-0.07	1.11
3931	P07	Experimental	MedChem Express	HY-Y1683	Levomenthol	400 uM	1.33333		CC1CCC(C(C1)O)C(C)C	C10H20O	156.265	0.0312	-0.35	-1.32
3931	P08	Experimental	MedChem Express	HY-Y1683	Levomenthol	80 uM	0.266667		CC1CCC(C(C1)O)C(C)C	C10H20O	156.265	0.0336	-0.22	-0.17
3931	P09	Experimental	MedChem Express	HY-12883	PF-05089771	400 uM	1.33333		C1=CC(=C(C=C1Cl)C2=C(NN=C2)N)OC3=CC(=C(C=C3Cl)S(=O)(=O)NC4=CSC=N4)F	C18H12Cl2FN5O3S2	500.354	0.029	-0.47	-2.47
3931	P10	Experimental	MedChem Express	HY-12883	PF-05089771	80 uM	0.266667		C1=CC(=C(C=C1Cl)C2=C(NN=C2)N)OC3=CC(=C(C=C3Cl)S(=O)(=O)NC4=CSC=N4)F	C18H12Cl2FN5O3S2	500.354	0.0346	-0.16	0.33
3931	P11	Experimental	MedChem Express	HY-B0563C	Ropivacaine mesylate	400 uM	1.33333		O=C([C@H]1N(CCC)CCCC1)NC2=C(C)C=CC=C2C.CS(=O)(O)=O	C18H30N2O4S	370.507	0.0364	-0.07	1.19
3931	P12	Experimental	MedChem Express	HY-B0563C	Ropivacaine mesylate	80 uM	0.266667		O=C([C@H]1N(CCC)CCCC1)NC2=C(C)C=CC=C2C.CS(=O)(O)=O	C18H30N2O4S	370.507	0.0323	-0.29	-0.78
3931	P13	Experimental	MedChem Express	HY-12796A	Vixotrigine hydrochloride	400 uM	1.33333		O=C([C@H]1N[C@@H](C2=CC=C(OCC3=CC=CC=C3F)C=C2)CC1)N.[H]Cl	C18H20ClFN2O2	350.815	0.0351	-0.13	0.56
3931	P14	Experimental	MedChem Express	HY-12796A	Vixotrigine hydrochloride	80 uM	0.266667		O=C([C@H]1N[C@@H](C2=CC=C(OCC3=CC=CC=C3F)C=C2)CC1)N.[H]Cl	C18H20ClFN2O2	350.815	0.0316	-0.33	-1.15
3931	P15	Experimental	Tocris	2625	Zonisamide	400 uM	1.33333		NS(=O)(=O)CC1=NOC2=CC=CC=C12	C8H8N2O3S	212.226	0.031	-0.37	-1.46
3931	P16	Experimental	Tocris	2625	Zonisamide	80 uM	0.266667		NS(=O)(=O)CC1=NOC2=CC=CC=C12	C8H8N2O3S	212.226	0.0329	-0.26	-0.52
3931	P17	Experimental	MedChem Express	HY-B1448	Benidipine hydrochloride	400 uM	1.33333		O=C(C1=C(C)NC(C)=C(C(O[C@H]2CN(CC3=CC=CC=C3)CCC2)=O)[C@@H]1C4=CC=CC([N+]([O-])=O)=C4)OC.[H]Cl	C28H32ClN3O6	542.023	0.0349	-0.14	0.48
3931	P18	Experimental	MedChem Express	HY-B1448	Benidipine hydrochloride	80 uM	0.266667		O=C(C1=C(C)NC(C)=C(C(O[C@H]2CN(CC3=CC=CC=C3)CCC2)=O)[C@@H]1C4=CC=CC([N+]([O-])=O)=C4)OC.[H]Cl	C28H32ClN3O6	542.023	0.0344	-0.17	0.2
3931	P19	Experimental	MedChem Express	HY-B0232	Dofetilide	400 uM	1.33333		CN(CCC1=CC=C(C=C1)NS(=O)(=O)C)CCOC2=CC=C(C=C2)NS(=O)(=O)C	C19H27N3O5S2	441.565	0.0319	-0.31	-1
3931	P20	Experimental	MedChem Express	HY-B0232	Dofetilide	80 uM	0.266667		CN(CCC1=CC=C(C=C1)NS(=O)(=O)C)CCOC2=CC=C(C=C2)NS(=O)(=O)C	C19H27N3O5S2	441.565	0.0337	-0.22	-0.14
3931	P21	Empty										0.0326	-0.27	-0.69
3931	P22	Empty										0.0291	-0.47	-2.41
3931	P23	Empty						Assay Negative Control				0.0292	-0.46	-2.32
3931	P24	Empty						Assay Negative Control				0.0456	0.44	5.77

## Sheet: Fig 1A
Time (ms)	V_cm (mV)	I_control (pA)	I_CBD (pA)
Column1	Column2	Column3	Column4
WaveName	'21617030M001_M70M20'	'21617030_Av3_sm_101_M70M20'	'21617035_Av3_sm_101_M70M20'
0	-70.0026	5.21009	-4.42295
0.02	-70.0026	5.11429	-4.50507
0.04	-70.0026	5.00632	-4.58916
0.06	-70.0026	4.88876	-4.67775
0.08	-70.0026	4.76441	-4.77283
0.1	-70.0026	4.63616	-4.87566
0.12	-70.0026	4.50682	-4.98663
0.14	-70.0026	4.379	-5.10521
0.16	-70.0026	4.25496	-5.23
0.18	-70.0026	4.13644	-5.35883
0.2	-70.0026	4.02457	-5.48892
0.22	-70.0026	3.91973	-5.61719
0.24	-70.0026	3.82157	-5.74049
0.26	-70.0026	3.729	-5.85594
0.28	-70.0026	3.64036	-5.96116
0.3	-70.0026	3.55358	-6.05446
0.32	-70.0026	3.46648	-6.13487
0.34	-70.0026	3.37707	-6.20217
0.36	-70.0026	3.28389	-6.25666
0.38	-70.0026	3.18628	-6.29903
0.4	-70.0026	3.08469	-6.33005
0.42	-70.0026	2.98078	-6.35044
0.44	-70.0026	2.87753	-6.36073
0.46	-70.0026	2.7791	-6.36124
0.48	-70.0026	2.6907	-6.35223
0.5	-70.0026	2.61814	-6.33412
0.52	-70.0026	2.56744	-6.30772
0.54	-70.0026	2.54424	-6.27449
0.56	-70.0026	2.55316	-6.23672
0.58	-70.0026	2.59725	-6.19755
0.6	-70.0026	2.67736	-6.16087
0.62	-70.0026	2.79181	-6.13101
0.64	-70.0026	2.93612	-6.11236
0.66	-70.0026	3.10307	-6.10882
0.68	-70.0026	3.28301	-6.12327
0.7	-70.0026	3.46448	-6.15714
0.72	-70.0026	3.63507	-6.20999
0.74	-70.0026	3.78244	-6.27936
0.76	-70.0026	3.89542	-6.36075
0.78	-70.0026	3.96505	-6.44789
0.8	-70.0026	3.98547	-6.5331
0.82	-70.0026	3.95452	-6.60792
0.84	-70.0026	3.87391	-6.66378
0.86	-70.0026	3.7491	-6.69272
0.88	-70.0026	3.58875	-6.68807
0.9	-70.0026	3.40385	-6.64499
0.92	-70.0026	3.20667	-6.56091
0.94	-70.0026	3.00961	-6.43563
0.96	-70.0026	2.8241	-6.27135
0.98	-70.0026	2.65969	-6.07233
1	-70.0026	2.52328	-5.84454
1.02	-70.0026	2.41876	-5.59514
1.04	-70.0026	2.34692	-5.33192
1.06	-70.0026	2.30559	-5.06292
1.08	-70.0026	2.2901	-4.79604
1.1	-70.0026	2.29391	-4.53885
1.12	-70.0026	2.30931	-4.29851
1.14	-70.0026	2.32828	-4.08182
1.16	-70.0026	2.34314	-3.89518
1.18	-70.0026	2.34733	-3.74464
1.2	-70.0026	2.33586	-3.63572
1.22	-70.0026	2.30569	-3.5732
1.24	-70.0026	2.25579	-3.56069
1.26	-70.0026	2.18707	-3.60019
1.28	-70.0026	2.10202	-3.69161
1.3	-70.0026	2.00423	-3.8324
1.32	-70.0026	1.89783	-4.01744
1.34	-70.0026	1.78691	-4.23914
1.36	-70.0026	1.67505	-4.48798
1.38	-70.0026	1.56513	-4.75322
1.4	-70.0026	1.4592	-5.02388
1.42	-70.0026	1.35879	-5.28988
1.44	-70.0026	1.26528	-5.54298
1.46	-70.0026	1.18042	-5.77755
1.48	-70.0026	1.10684	-5.99099
1.5	-70.0026	1.0483	-6.18365
1.52	-70.0026	1.00978	-6.35842
1.54	-70.0026	0.997102	-6.51983
1.56	-70.0026	1.01624	-6.67306
1.58	-70.0026	1.07239	-6.82283
1.6	-70.0026	1.1688	-6.97252
1.62	-70.0026	1.30576	-7.12351
1.64	-70.0026	1.47978	-7.27493
1.66	-70.0026	1.68324	-7.42392
1.68	-70.0026	1.90456	-7.56606
1.7	-70.0026	2.12898	-7.69613
1.72	-70.0026	2.33982	-7.80896
1.74	-70.0026	2.52014	-7.90008
1.76	-70.0026	2.65454	-7.96622
1.78	-70.0026	2.73086	-8.00553
1.8	-70.0026	2.74153	-8.01749
1.82	-70.0026	2.68443	-8.00258
1.84	-70.0026	2.56316	-7.96191
1.86	-70.0026	2.38658	-7.89677
1.88	-70.0026	2.16792	-7.80835
1.9	-70.0026	1.92331	-7.69761
1.92	-70.0026	1.67022	-7.56543
1.94	-70.0026	1.42581	-7.41282
1.96	-70.0026	1.20547	-7.24139
1.98	-70.0026	1.02163	-7.05369
2	-70.0026	0.883036	-6.85355
2.02	-70.0026	0.794411	-6.64625
2.04	-70.0026	0.756562	-6.43848
2.06	-70.0026	0.766793	-6.23807
2.08	-70.0026	0.819581	-6.05354
2.1	-70.0026	0.907393	-5.8936
2.12	-70.0026	1.02154	-5.7665
2.14	-70.0026	1.15301	-5.67943
2.16	-70.0026	1.29316	-5.638
2.18	-70.0026	1.43434	-5.64579
2.2	-70.0026	1.57029	-5.70411
2.22	-70.0026	1.69643	-5.81182
2.24	-70.0026	1.80989	-5.96538
2.26	-70.0026	1.9095	-6.15897
2.28	-70.0026	1.99552	-6.38481
2.3	-70.0026	2.06928	-6.63357
2.32	-70.0026	2.13274	-6.8949
2.34	-70.0026	2.18795	-7.158
2.36	-70.0026	2.2365	-7.41223
2.38	-70.0026	2.27905	-7.64769
2.4	-70.0026	2.31496	-7.85567
2.42	-70.0026	2.3421	-8.02906
2.44	-70.0026	2.35683	-8.1625
2.46	-70.0026	2.35434	-8.25248
2.48	-70.0026	2.32907	-8.29721
2.5	-70.0026	2.27542	-8.29643
2.52	-70.0026	2.18853	-8.25123
2.54	-70.0026	2.06511	-8.16382
2.56	-70.0026	1.90415	-8.03747
2.58	-70.0026	1.70747	-7.87642
2.6	-70.0026	1.47998	-7.68602
2.62	-70.0026	1.22961	-7.47274
2.64	-70.0026	0.966916	-7.24428
2.66	-70.0026	0.704319	-7.0095
2.68	-70.0026	0.455149	-6.77818
2.7	-70.0026	0.232495	-6.5606
2.72	-70.0026	0.0480302	-6.36689
2.74	-70.0026	-0.0890568	-6.20623
2.76	-70.0026	-0.172929	-6.08606
2.78	-70.0026	-0.201653	-6.01126
2.8	-70.0026	-0.177385	-5.98359
2.82	-70.0026	-0.106171	-6.00139
2.84	-70.0026	0.00262462	-6.05964
2.86	-70.0026	0.137184	-6.15032
2.88	-70.0026	0.284313	-6.26309
2.9	-70.0026	0.430608	-6.38626
2.92	-70.0026	0.563617	-6.5077
2.94	-70.0026	0.672852	-6.61588
2.96	-70.0026	0.750593	-6.70067
2.98	-70.0026	0.792406	-6.75402
3	-70.0026	0.797335	-6.77036
3.02	-70.0026	0.767803	-6.74683
3.04	-70.0026	0.709213	-6.68321
3.06	-70.0026	0.62934	-6.58179
3.08	-70.0026	0.537548	-6.44709
3.1	-70.0026	0.443938	-6.28541
3.12	-70.0026	0.358487	-6.10437
3.14	-70.0026	0.290261	-5.91236
3.16	-70.0026	0.246762	-5.71792
3.18	-70.0026	0.233434	-5.52912
3.2	-70.0026	0.2534	-5.35294
3.22	-70.0026	0.307412	-5.19471
3.24	-70.0026	0.394026	-5.05775
3.26	-70.0026	0.509965	-4.94323
3.28	-70.0026	0.650623	-4.85024
3.3	-70.0026	0.810656	-4.77616
3.32	-70.0026	0.984599	-4.71731
3.34	-70.0026	1.16742	-4.66961
3.36	-70.0026	1.35493	-4.62944
3.38	-70.0026	1.54412	-4.59426
3.4	-70.0026	1.73317	-4.56311
3.42	-70.0026	1.92143	-4.53671
3.44	-70.0026	2.10919	-4.5174
3.46	-70.0026	2.29739	-4.5086
3.48	-70.0026	2.48725	-4.51422
3.5	-70.0026	2.68005	-4.53788
3.52	-70.0026	2.87686	-4.58219
3.54	-70.0026	3.07844	-4.64826
3.56	-70.0026	3.28519	-4.7353
3.58	-70.0026	3.4972	-4.84067
3.6	-70.0026	3.71428	-4.96004
3.62	-70.0026	3.93603	-5.08781
3.64	-70.0026	4.16182	-5.21768
3.66	-70.0026	4.39071	-5.34316
3.68	-70.0026	4.62141	-5.45805
3.7	-70.0026	4.85213	-5.55679
3.72	-70.0026	5.08056	-5.63469
3.74	-70.0026	5.30379	-5.68798
3.76	-70.0026	5.51848	-5.71387
3.78	-70.0026	5.72107	-5.71042
3.8	-70.0026	5.90803	-5.67665
3.82	-70.0026	6.07629	-5.6125
3.84	-70.0026	6.22349	-5.519
3.86	-70.0026	6.34828	-5.39846
3.88	-70.0026	6.45035	-5.25465
3.9	-70.0026	6.53038	-5.09293
3.92	-70.0026	6.58974	-4.9203
3.94	-70.0026	6.63002	-4.74519
3.96	-70.0026	6.65258	-4.57713
3.98	-70.0026	6.65803	-4.42607
4	-70.0026	6.64589	-4.30167
4.02	-70.0026	6.61448	-4.21231
4.04	-70.0026	6.56104	-4.16421
4.06	-70.0026	6.48214	-4.16061
4.08	-70.0026	6.37433	-4.20117
4.1	-70.0026	6.23485	-4.28171
4.12	-70.0026	6.0624	-4.39437
4.14	-70.0026	5.85773	-4.52818
4.16	-70.0026	5.62394	-4.67004
4.18	-70.0026	5.3665	-4.80597
4.2	-70.0026	5.09289	-4.92259
4.22	-70.0026	4.81194	-5.00858
4.24	-70.0026	4.53297	-5.05595
4.26	-70.0026	4.26497	-5.06101
4.28	-70.0026	4.01573	-5.02483
4.3	-70.0026	3.79134	-4.95317
4.32	-70.0026	3.59591	-4.85589
4.34	-70.0026	3.43165	-4.74581
4.36	-70.0026	3.29917	-4.63728
4.38	-70.0026	3.19807	-4.54457
4.4	-70.0026	3.12746	-4.4803
4.42	-70.0026	3.0864	-4.45411
4.44	-70.0026	3.07428	-4.47172
4.46	-70.0026	3.09075	-4.53453
4.48	-70.0026	3.13559	-4.63978
4.5	-70.0026	3.20825	-4.78111
4.52	-70.0026	3.3074	-4.94966
4.54	-70.0026	3.43047	-5.13528
4.56	-70.0026	3.57334	-5.32784
4.58	-70.0026	3.73024	-5.51846
4.6	-70.0026	3.89402	-5.70042
4.62	-70.0026	4.05658	-5.86968
4.64	-70.0026	4.20952	-6.02508
4.66	-70.0026	4.34491	-6.168
4.68	-70.0026	4.45609	-6.30181
4.7	-70.0026	4.53826	-6.43096
4.72	-70.0026	4.58901	-6.56
4.74	-70.0026	4.60854	-6.69264
4.76	-70.0026	4.59966	-6.83088
4.78	-70.0026	4.56761	-6.97441
4.8	-70.0026	4.51967	-7.12031
4.82	-70.0026	4.46464	-7.26309
4.84	-70.0026	4.41225	-7.39507
4.86	-70.0026	4.37241	-7.50715
4.88	-70.0026	4.3545	-7.5897
4.9	-70.0026	4.36657	-7.63365
4.92	-70.0026	4.41453	-7.63164
4.94	-70.0026	4.50146	-7.57899
4.96	-70.0026	4.62694	-7.47439
4.98	-70.0026	4.78668	-7.32036
5	-70.0026	4.97243	-7.12315
5.02	-70.0026	5.17224	-6.89226
5.04	-70.0026	5.37122	-6.63953
5.06	-70.0026	5.55263	-6.378
5.08	-70.0026	5.69941	-6.12047
5.1	-70.0026	5.79577	-5.87824
5.12	-70.0026	5.829	-5.65993
5.14	-70.0026	5.79086	-5.47075
5.16	-70.0026	5.67882	-5.31214
5.18	-70.0026	5.49654	-5.18203
5.2	-70.0026	5.25385	-5.0754
5.22	-70.0026	4.96597	-4.98537
5.24	-70.0026	4.65223	-4.90429
5.26	-70.0026	4.33422	-4.82498
5.28	-70.0026	4.03379	-4.74169
5.3	-70.0026	3.77103	-4.65078
5.32	-70.0026	3.56247	-4.55096
5.34	-70.0026	3.41968	-4.44308
5.36	-70.0026	3.34851	-4.32967
5.38	-70.0026	3.34892	-4.21405
5.4	-70.0026	3.41549	-4.09952
5.42	-70.0026	3.53842	-3.98849
5.44	-70.0026	3.70502	-3.88189
5.46	-70.0026	3.90126	-3.77884
5.48	-70.0026	4.11345	-3.67667
5.5	-70.0026	4.3296	-3.57133
5.52	-70.0026	4.54041	-3.45799
5.54	-70.0026	4.73983	-3.33183
5.56	-70.0026	4.92502	-3.18889
5.58	-70.0026	5.09583	-3.02675
5.6	-70.0026	5.25394	-2.84511
5.62	-70.0026	5.4017	-2.64594
5.64	-70.0026	5.54105	-2.43351
5.66	-70.0026	5.6725	-2.21391
5.68	-70.0026	5.79452	-1.99454
5.7	-70.0026	5.90335	-1.78327
5.72	-70.0026	5.99327	-1.58762
5.74	-70.0026	6.05734	-1.41404
5.76	-70.0026	6.0884	-1.26722
5.78	-70.0026	6.0803	-1.14975
5.8	-70.0026	6.02902	-1.06197
5.82	-70.0026	5.93351	-1.00209
5.84	-70.0026	5.79622	-0.966615
5.86	-70.0026	5.62308	-0.950877
5.88	-70.0026	5.42293	-0.949713
5.9	-70.0026	5.20661	-0.958156
5.92	-70.0026	4.98562	-0.972051
5.94	-70.0026	4.77075	-0.988537
5.96	-70.0026	4.57078	-1.00635
5.98	-70.0026	4.3914	-1.0259
6	-70.0026	4.23464	-1.04916
6.02	-70.0026	4.09877	-1.07931
6.04	-70.0026	3.97876	-1.12036
6.06	-70.0026	3.86717	-1.17649
6.08	-70.0026	3.75543	-1.25156
6.1	-70.0026	3.63528	-1.34846
6.12	-70.0026	3.50013	-1.46869
6.14	-70.0026	3.34629	-1.61193
6.16	-70.0026	3.17374	-1.77586
6.18	-70.0026	2.98649	-1.95617
6.2	-70.0026	2.79236	-2.14668
6.22	-70.0026	2.60231	-2.33975
6.24	-70.0026	2.42932	-2.5268
6.26	-70.0026	2.28708	-2.69897
6.28	-70.0026	2.18848	-2.8478
6.3	-70.0026	2.14427	-2.96599
6.32	-70.0026	2.16183	-3.048
6.34	-70.0026	2.24442	-3.09053
6.36	-70.0026	2.39073	-3.09285
6.38	-70.0026	2.59493	-3.05689
6.4	-70.0026	2.84713	-2.98705
6.42	-70.0026	3.13413	-2.88995
6.44	-70.0026	3.44045	-2.77386
6.46	-70.0026	3.74945	-2.6482
6.48	-70.0026	4.0445	-2.52284
6.5	-70.0026	4.31003	-2.40754
6.52	-70.0026	4.53243	-2.31136
6.54	-70.0026	4.70077	-2.24226
6.56	-70.0026	4.80723	-2.20673
6.58	-70.0026	4.84736	-2.20954
6.6	-70.0026	4.82011	-2.25369
6.62	-70.0026	4.72761	-2.34037
6.64	-70.0026	4.57489	-2.46903
6.66	-70.0026	4.3694	-2.63753
6.68	-70.0026	4.12047	-2.84232
6.7	-70.0026	3.8388	-3.07864
6.72	-70.0026	3.53577	-3.34075
6.74	-70.0026	3.22295	-3.62216
6.76	-70.0026	2.91149	-3.91584
6.78	-70.0026	2.6117	-4.21445
6.8	-70.0026	2.33259	-4.51062
6.82	-70.0026	2.08159	-4.79718
6.84	-70.0026	1.86434	-5.06752
6.86	-70.0026	1.68456	-5.31592
6.88	-70.0026	1.54405	-5.53793
6.9	-70.0026	1.44284	-5.73071
6.92	-70.0026	1.37932	-5.89334
6.94	-70.0026	1.3506	-6.02701
6.96	-70.0026	1.3528	-6.13499
6.98	-70.0026	1.38144	-6.22244
7	-70.0026	1.43187	-6.29598
7.02	-70.0026	1.49957	-6.36309
7.04	-70.0026	1.58049	-6.4313
7.06	-70.0026	1.67131	-6.50744
7.08	-70.0026	1.76953	-6.59684
7.1	-70.0026	1.87353	-6.70281
7.12	-70.0026	1.98248	-6.82621
7.14	-70.0026	2.09618	-6.96551
7.16	-70.0026	2.2148	-7.11696
7.18	-70.0026	2.33861	-7.27516
7.2	-70.0026	2.46766	-7.43375
7.22	-70.0026	2.60162	-7.5862
7.24	-70.0026	2.73955	-7.72656
7.26	-70.0026	2.87987	-7.8501
7.28	-70.0026	3.0205	-7.95373
7.3	-70.0026	3.15895	-8.03619
7.32	-70.0026	3.2927	-8.09801
7.34	-70.0026	3.41942	-8.14119
7.36	-70.0026	3.53734	-8.16884
7.38	-70.0026	3.64541	-8.18459
7.4	-70.0026	3.7434	-8.19215
7.42	-70.0026	3.83184	-8.19474
7.44	-70.0026	3.9118	-8.19479
7.46	-70.0026	3.98456	-8.19363
7.48	-70.0026	4.05124	-8.19146
7.5	-70.0026	4.11243	-8.18741
7.52	-70.0026	4.16792	-8.17972
7.54	-70.0026	4.21661	-8.16608
7.56	-70.0026	4.25656	-8.14404
7.58	-70.0026	4.2853	-8.11139
7.6	-70.0026	4.30022	-8.06668
7.62	-70.0026	4.29915	-8.00946
7.64	-70.0026	4.28083	-7.94066
7.66	-70.0026	4.24536	-7.86262
7.68	-70.0026	4.19448	-7.77911
7.7	-70.0026	4.13157	-7.69512
7.72	-70.0026	4.06152	-7.6165
7.74	-70.0026	3.99026	-7.54947
7.76	-70.0026	3.92423	-7.50014
7.78	-70.0026	3.86972	-7.4739
7.8	-70.0026	3.83225	-7.47497
7.82	-70.0026	3.81597	-7.50594
7.84	-70.0026	3.82328	-7.56754
7.86	-70.0026	3.85455	-7.65854
7.88	-70.0026	3.90815	-7.77582
7.9	-70.0026	3.98051	-7.91456
7.92	-70.0026	4.06648	-8.06866
7.94	-70.0026	4.15975	-8.23109
7.96	-70.0026	4.25334	-8.39445
7.98	-70.0026	4.34023	-8.55134
8	-70.0026	4.41393	-8.69485
8.02	-70.0026	4.46902	-8.81882
8.04	-70.0026	4.50176	-8.91809
8.06	-70.0026	4.51038	-8.9886
8.08	-70.0026	4.4954	-9.02741
8.1	-70.0026	4.45964	-9.03264
8.12	-70.0026	4.40802	-9.00335
8.14	-70.0026	4.34711	-8.9395
8.16	-70.0026	4.28451	-8.84179
8.18	-70.0026	4.22804	-8.71172
8.2	-70.0026	4.18493	-8.55162
8.22	-70.0026	4.16098	-8.36471
8.24	-70.0026	4.15998	-8.15526
8.26	-70.0026	4.18332	-7.92869
8.28	-70.0026	4.22988	-7.69153
8.3	-70.0026	4.29627	-7.45135
8.32	-70.0026	4.3773	-7.21641
8.34	-70.0026	4.46668	-6.99523
8.36	-70.0026	4.55769	-6.79587
8.38	-70.0026	4.64399	-6.62525
8.4	-70.0026	4.72015	-6.4883
8.42	-70.0026	4.78209	-6.38734
8.44	-70.0026	4.82722	-6.32157
8.46	-70.0026	4.85446	-6.28689
8.48	-70.0026	4.864	-6.27604
8.5	-70.0026	4.85692	-6.27922
8.52	-70.0026	4.8349	-6.28487
8.54	-70.0026	4.79975	-6.28084
8.56	-70.0026	4.75314	-6.25556
8.58	-70.0026	4.69638	-6.19925
8.6	-70.0026	4.63027	-6.10487
8.62	-70.0026	4.55513	-5.96884
8.64	-70.0026	4.47085	-5.79133
8.66	-70.0026	4.3771	-5.57622
8.68	-70.0026	4.27354	-5.33058
8.7	-70.0026	4.16011	-5.064
8.72	-70.0026	4.03728	-4.78765
8.74	-70.0026	3.9064	-4.51326
8.76	-70.0026	3.76984	-4.25223
8.78	-70.0026	3.63119	-4.01477
8.8	-70.0026	3.49523	-3.80937
8.82	-70.0026	3.36779	-3.64243
8.84	-70.0026	3.25541	-3.51809
8.86	-70.0026	3.16481	-3.43842
8.88	-70.0026	3.10224	-3.40353
8.9	-70.0026	3.07275	-3.41198
8.92	-70.0026	3.07943	-3.46108
8.94	-70.0026	3.12283	-3.54718
8.96	-70.0026	3.20051	-3.66598
8.98	-70.0026	3.30696	-3.81262
9	-70.0026	3.43386	-3.98177
9.02	-70.0026	3.57063	-4.16772
9.04	-70.0026	3.70541	-4.36429
9.06	-70.0026	3.82619	-4.56494
9.08	-70.0026	3.92202	-4.76282
9.1	-70.0026	3.98424	-4.951
9.12	-70.0026	4.00737	-5.12276
9.14	-70.0026	3.98982	-5.27199
9.16	-70.0026	3.93403	-5.39368
9.18	-70.0026	3.84621	-5.48438
9.2	-70.0026	3.73564	-5.54264
9.22	-70.0026	3.61364	-5.56936
9.24	-70.0026	3.49222	-5.56797
9.26	-70.0026	3.38282	-5.54434
9.28	-70.0026	3.295	-5.50657
9.3	-70.0026	3.23545	-5.46455
9.32	-70.0026	3.20735	-5.42929
9.34	-70.0026	3.21016	-5.41214
9.36	-70.0026	3.23982	-5.42405
9.38	-70.0026	3.28933	-5.47468
9.4	-70.0026	3.34966	-5.57173
9.42	-70.0026	3.41077	-5.72035
9.44	-70.0026	3.46267	-5.9227
9.46	-70.0026	3.49634	-6.17788
9.48	-70.0026	3.50452	-6.48191
9.5	-70.0026	3.48209	-6.8281
9.52	-70.0026	3.42634	-7.20748
9.54	-70.0026	3.33683	-7.60949
9.56	-70.0026	3.21513	-8.0227
9.58	-70.0026	3.06446	-8.43555
9.6	-70.0026	2.8892	-8.83709
9.62	-70.0026	2.69456	-9.21753
9.64	-70.0026	2.48618	-9.5687
9.66	-70.0026	2.2699	-9.88424
9.68	-70.0026	2.05157	-10.1597
9.7	-70.0026	1.8369	-10.3923
9.72	-70.0026	1.63135	-10.5808
9.74	-70.0026	1.43996	-10.7249
9.76	-70.0026	1.26722	-10.8252
9.78	-70.0026	1.1169	-10.8825
9.8	-70.0026	0.991832	-10.8977
9.82	-70.0026	0.893825	-10.872
9.84	-70.0026	0.823542	-10.8064
9.86	-70.0026	0.780518	-10.702
9.88	-70.0026	0.763252	-10.5605
9.9	-70.0026	0.769404	-10.3836
9.92	-70.0026	0.796063	-10.1738
9.94	-70.0026	0.840061	-9.93439
9.96	-70.0026	0.898294	-9.66895
9.98	-70.0026	0.968015	-9.38172
10	-70.0026	1.04706	-9.07728
10.02	-70.0026	1.13396	-8.7603
10.04	-70.0026	1.22798	-8.43542
10.06	-70.0026	1.32903	-8.10709
10.08	-70.0026	1.43747	-7.77945
10.1	-70.0026	1.55382	-7.45628
10.12	-70.0026	1.67852	-7.14099
10.14	-70.0026	1.81161	-6.83661
10.16	-70.0026	1.95248	-6.54584
10.18	-70.0026	2.09972	-6.27097
10.2	-70.0026	2.25105	-6.01388
10.22	-70.0026	2.40338	-5.77598
10.24	-70.0026	2.55296	-5.5582
10.26	-70.0026	2.69558	-5.36089
10.28	-70.0026	2.82689	-5.18393
10.3	-70.0026	2.94264	-5.02675
10.32	-70.0026	3.03892	-4.88846
10.34	-70.0026	3.11232	-4.76806
10.36	-70.0026	3.16005	-4.66459
10.38	-70.0026	3.17997	-4.5773
10.4	-70.0026	3.17056	-4.50576
10.42	-70.0026	3.1309	-4.4499
10.44	-70.0026	3.06067	-4.41001
10.46	-70.0026	2.96012	-4.38654
10.48	-70.0026	2.83017	-4.37997
10.5	-70.0026	2.67244	-4.39058
10.52	-70.0026	2.48931	-4.41818
10.54	-70.0026	2.28396	-4.46197
10.56	-70.0026	2.06027	-4.52037
10.58	-70.0026	1.82271	-4.59104
10.6	-70.0026	1.57602	-4.67094
10.62	-70.0026	1.32494	-4.75645
10.64	-70.0026	1.07389	-4.84371
10.66	-70.0026	0.826661	-4.92883
10.68	-70.0026	0.586244	-5.00824
10.7	-70.0026	0.354837	-5.07894
10.72	-70.0026	0.13397	-5.13872
10.74	-70.0026	-0.0752151	-5.18625
10.76	-70.0026	-0.271606	-5.22113
10.78	-70.0026	-0.453773	-5.24382
10.8	-70.0026	-0.619728	-5.25549
10.82	-70.0026	-0.766862	-5.25789
10.84	-70.0026	-0.892122	-5.25316
10.86	-70.0026	-0.992403	-5.24371
10.88	-70.0026	-1.06513	-5.23213
10.9	-70.0026	-1.10889	-5.22109
10.92	-70.0026	-1.12406	-5.21336
10.94	-70.0026	-1.11317	-5.21174
10.96	-70.0026	-1.08103	-5.21902
10.98	-70.0026	-1.03446	-5.23788
11	-70.0026	-0.981625	-5.27079
11.02	-70.0026	-0.93118	-5.31974
11.04	-70.0026	-0.891119	-5.38609
11.06	-70.0026	-0.86771	-5.47028
11.08	-70.0026	-0.864587	-5.57169
11.1	-70.0026	-0.882171	-5.68841
11.12	-70.0026	-0.917543	-5.81725
11.14	-70.0026	-0.964772	-5.95371
11.16	-70.0026	-1.01568	-6.09211
11.18	-70.0026	-1.06092	-6.22578
11.2	-70.0026	-1.09122	-6.34735
11.22	-70.0026	-1.09856	-6.44912
11.24	-70.0026	-1.0772	-6.52343
11.26	-70.0026	-1.02436	-6.56314
11.28	-70.0026	-0.940462	-6.56206
11.3	-70.0026	-0.829025	-6.51541
11.32	-70.0026	-0.696127	-6.4202
11.34	-70.0026	-0.54966	-6.27553
11.36	-70.0026	-0.398438	-6.08273
11.38	-70.0026	-0.251299	-5.84533
11.4	-70.0026	-0.116328	-5.5688
11.42	-70.0026	-0.00025613	-5.26011
11.44	-70.0026	0.0919298	-4.92706
11.46	-70.0026	0.157161	-4.57763
11.48	-70.0026	0.19429	-4.21912
11.5	-70.0026	0.203969	-3.85753
11.52	-70.0026	0.188452	-3.49705
11.54	-70.0026	0.151372	-3.13975
11.56	-70.0026	0.0974813	-2.78568
11.58	-70.0026	0.0323977	-2.43314
11.6	-70.0026	-0.037688	-2.0793
11.62	-70.0026	-0.106326	-1.72096
11.64	-70.0026	-0.167157	-1.35536
11.66	-70.0026	-0.214285	-0.980986
11.68	-70.0026	-0.242644	-0.598223
11.7	-70.0026	-0.248318	-0.209735
11.72	-70.0026	-0.228771	0.179432
11.74	-70.0026	-0.182943	0.562073
11.76	-70.0026	-0.11121	0.929331
11.78	-70.0026	-0.0152072	1.27145
11.8	-70.0026	0.102471	1.57868
11.82	-70.0026	0.23862	1.84218
11.84	-70.0026	0.389788	2.05492
11.86	-70.0026	0.55258	2.21235
11.88	-70.0026	0.723869	2.31283
11.9	-70.0026	0.900895	2.35776
11.92	-70.0026	1.08127	2.35147
11.94	-70.0026	1.2629	2.3007
11.96	-70.0026	1.44385	2.214
11.98	-70.0026	1.62227	2.10087
12	-70.0026	1.7963	1.971
12.02	-70.0026	1.96407	1.83341
12.04	-70.0026	2.12382	1.69582
12.06	-70.0026	2.27396	1.56413
12.08	-70.0026	2.41322	1.44213
12.1	-70.0026	2.54081	1.33139
12.12	-70.0026	2.65645	1.23137
12.14	-70.0026	2.76042	1.13964
12.16	-70.0026	2.85349	1.05227
12.18	-70.0026	2.93679	0.9643
12.2	-70.0026	3.01162	0.870283
12.22	-70.0026	3.07932	0.76484
12.24	-70.0026	3.14097	0.643237
12.26	-70.0026	3.19731	0.501908
12.28	-70.0026	3.24855	0.338897
12.3	-70.0026	3.29433	0.154166
12.32	-70.0026	3.33362	-0.0502694
12.34	-70.0026	3.36479	-0.270403
12.36	-70.0026	3.38562	-0.500512
12.38	-70.0026	3.39344	-0.733627
12.4	-70.0026	3.38523	-0.962168
12.42	-70.0026	3.35787	-1.17867
12.44	-70.0026	3.30829	-1.3765
12.46	-70.0026	3.2338	-1.55062
12.48	-70.0026	3.13243	-1.69803
12.5	-70.0026	3.00318	-1.81822
12.52	-70.0026	2.84641	-1.91325
12.54	-70.0026	2.6641	-1.98761
12.56	-70.0026	2.46	-2.04789
12.58	-70.0026	2.23976	-2.10219
12.6	-70.0026	2.01079	-2.15939
12.62	-70.0026	1.782	-2.22831
12.64	-70.0026	1.56332	-2.31689
12.66	-70.0026	1.36507	-2.43132
12.68	-70.0026	1.19722	-2.57539
12.7	-70.0026	1.06852	-2.74997
12.72	-70.0026	0.985789	-2.95271
12.74	-70.0026	0.953176	-3.17809
12.76	-70.0026	0.971742	-3.41774
12.78	-70.0026	1.03926	-3.66104
12.8	-70.0026	1.15036	-3.89596
12.82	-70.0026	1.29699	-4.11011
12.84	-70.0026	1.46918	-4.29184
12.86	-70.0026	1.65609	-4.43129
12.88	-70.0026	1.84705	-4.52134
12.9	-70.0026	2.03273	-4.55822
12.92	-70.0026	2.2061	-4.54186
12.94	-70.0026	2.36315	-4.47589
12.96	-70.0026	2.50323	-4.36716
12.98	-70.0026	2.62897	-4.22508
13	-70.0026	2.74576	-4.06062
13.02	-70.0026	2.86089	-3.8852
13.04	-70.0026	2.98236	-3.70966
13.06	-70.0026	3.11756	-3.54322
13.08	-70.0026	3.272	-3.39273
13.1	-70.0026	3.44832	-3.26223
13.12	-70.0026	3.64552	-3.15281
13.14	-70.0026	3.85888	-3.06283
13.16	-70.0026	4.08024	-2.98848
13.18	-70.0026	4.29886	-2.92449
13.2	-70.0026	4.50267	-2.86504
13.22	-70.0026	4.6797	-2.80463
13.24	-70.0026	4.81957	-2.73897
13.26	-70.0026	4.91473	-2.6655
13.28	-70.0026	4.9614	-2.58385
13.3	-70.0026	4.95988	-2.49581
13.32	-70.0026	4.91448	-2.40514
13.34	-70.0026	4.83287	-2.31705
13.36	-70.0026	4.7251	-2.23745
13.38	-70.0026	4.60245	-2.17222
13.4	-70.0026	4.47628	-2.12639
13.42	-70.0026	4.35701	-2.10351
13.44	-70.0026	4.25348	-2.10522
13.46	-70.0026	4.17257	-2.13108
13.48	-70.0026	4.11918	-2.17874
13.5	-70.0026	4.0964	-2.24426
13.52	-70.0026	4.10584	-2.32276
13.54	-70.0026	4.14788	-2.40904
13.56	-70.0026	4.22187	-2.49831
13.58	-70.0026	4.32612	-2.58675
13.6	-70.0026	4.45782	-2.67197
13.62	-70.0026	4.61276	-2.75319
13.64	-70.0026	4.78522	-2.83123
13.66	-70.0026	4.96786	-2.90835
13.68	-70.0026	5.15195	-2.98784
13.7	-70.0026	5.32781	-3.07361
13.72	-70.0026	5.48556	-3.16965
13.74	-70.0026	5.61602	-3.2796
13.76	-70.0026	5.71173	-3.40632
13.78	-70.0026	5.76784	-3.55152
13.8	-70.0026	5.78277	-3.71556
13.82	-70.0026	5.75845	-3.89726
13.84	-70.0026	5.70023	-4.09393
13.86	-70.0026	5.61626	-4.30138
13.88	-70.0026	5.51658	-4.51411
13.9	-70.0026	5.41197	-4.72559
13.92	-70.0026	5.31278	-4.92862
13.94	-70.0026	5.22789	-5.11574
13.96	-70.0026	5.16389	-5.2797
13.98	-70.0026	5.12469	-5.41394
14	-70.0026	5.11146	-5.51293
14.02	-70.0026	5.12289	-5.57255
14.04	-70.0026	5.15573	-5.5902
14.06	-70.0026	5.20543	-5.56492
14.08	-70.0026	5.26675	-5.49723
14.1	-70.0026	5.33428	-5.38897
14.12	-70.0026	5.40283	-5.24301
14.14	-70.0026	5.46756	-5.06298
14.16	-70.0026	5.52402	-4.85299
14.18	-70.0026	5.5681	-4.61738
14.2	-70.0026	5.59593	-4.36061
14.22	-70.0026	5.60384	-4.08714
14.24	-70.0026	5.58842	-3.80133
14.26	-70.0026	5.54668	-3.50742
14.28	-70.0026	5.4762	-3.20944
14.3	-70.0026	5.37548	-2.91108
14.32	-70.0026	5.24412	-2.61553
14.34	-70.0026	5.08302	-2.32535
14.36	-70.0026	4.8945	-2.04233
14.38	-70.0026	4.68223	-1.76741
14.4	-70.0026	4.45106	-1.50072
14.42	-70.0026	4.20686	-1.2418
14.44	-70.0026	3.9561	-0.989911
14.46	-70.0026	3.70553	-0.744452
14.48	-70.0026	3.46173	-0.505487
14.5	-70.0026	3.23076	-0.274203
14.52	-70.0026	3.01773	-0.0532957
14.54	-70.0026	2.82648	0.152826
14.56	-70.0026	2.65931	0.338083
14.58	-70.0026	2.51678	0.495026
14.6	-70.0026	2.39768	0.615391
14.62	-70.0026	2.29908	0.69085
14.64	-70.0026	2.21654	0.713892
14.66	-70.0026	2.14457	0.6787
14.68	-70.0026	2.07707	0.581937
14.7	-70.0026	2.00796	0.423308
14.72	-70.0026	1.93183	0.20583
14.74	-70.0026	1.8445	-0.0642401
14.76	-70.0026	1.7435	-0.377803
14.78	-70.0026	1.62838	-0.723615
14.8	-70.0026	1.50081	-1.08918
14.82	-70.0026	1.36441	-1.46174
14.84	-70.0026	1.2244	-1.82923
14.86	-70.0026	1.08701	-2.18109
14.88	-70.0026	0.958876	-2.50884
14.9	-70.0026	0.84626	-2.80641
14.92	-70.0026	0.754401	-3.07014
14.94	-70.0026	0.686941	-3.29858
14.96	-70.0026	0.645531	-3.4921
14.98	-70.0026	0.629662	-3.65238
15	-70.0026	0.636712	-3.78189
15.02	-70.0026	0.662221	-3.88345
15.04	-70.0026	0.700353	-3.95987
15.06	-70.0026	0.744499	-4.01371
15.08	-70.0026	0.78794	-4.04719
15.1	-70.0026	0.824527	-4.06217
15.12	-70.0026	0.849282	-4.06027
15.14	-70.0026	0.858898	-4.04293
15.16	-70.0026	0.852085	-4.01166
15.18	-70.0026	0.829743	-3.9681
15.2	-70.0026	0.794943	-3.9142
15.22	-70.0026	0.752753	-3.8523
15.24	-70.0026	0.70991	-3.78518
15.26	-70.0026	0.674382	-3.71603
15.28	-70.0026	0.654847	-3.64839
15.3	-70.0026	0.660108	-3.58597
15.32	-70.0026	0.698499	-3.53239
15.34	-70.0026	0.777289	-3.49094
15.36	-70.0026	0.902129	-3.46419
15.38	-70.0026	1.07655	-3.45375
15.4	-70.0026	1.30157	-3.45994
15.42	-70.0026	1.57539	-3.48169
15.44	-70.0026	1.89325	-3.51645
15.46	-70.0026	2.24748	-3.56029
15.48	-70.0026	2.62776	-3.60818
15.5	-70.0026	3.02149	-3.65425
15.52	-70.0026	3.41452	-3.69221
15.54	-70.0026	3.7919	-3.71579
15.56	-70.0026	4.13884	-3.71907
15.58	-70.0026	4.44173	-3.69681
15.6	-70.0026	4.68909	-3.64467
15.62	-70.0026	4.87248	-3.55938
15.64	-70.0026	4.98717	-3.4387
15.66	-70.0026	5.03257	-3.28157
15.68	-70.0026	5.01236	-3.08797
15.7	-70.0026	4.93425	-2.85898
15.72	-70.0026	4.80946	-2.59678
15.74	-70.0026	4.65186	-2.30468
15.76	-70.0026	4.47692	-1.98712
15.78	-70.0026	4.30049	-1.64968
15.8	-70.0026	4.13758	-1.29901
15.82	-70.0026	4.00116	-0.942666
15.84	-70.0026	3.90122	-0.588872
15.86	-70.0026	3.84398	-0.24614
15.88	-70.0026	3.83158	0.0771482
15.9	-70.0026	3.86208	0.373211
15.92	-70.0026	3.9299	0.63531
15.94	-70.0026	4.02658	0.858115
15.96	-70.0026	4.14186	1.03795
15.98	-70.0026	4.26489	1.17291
16	-70.0026	4.38544	1.26277
16.02	-70.0026	4.49502	1.30883
16.04	-70.0026	4.58761	1.31361
16.06	-70.0026	4.66012	1.2805
16.08	-70.0026	4.71237	1.21344
16.1	-70.0026	4.74662	1.1166
16.12	-70.0026	4.76684	0.994138
16.14	-70.0026	4.77775	0.850074
16.16	-70.0026	4.78387	0.688167
16.18	-70.0026	4.78864	0.511893
16.2	-70.0026	4.79387	0.32443
16.22	-70.0026	4.79958	0.128652
16.24	-70.0026	4.80408	-0.0728753
16.26	-70.0026	4.80452	-0.277907
16.28	-70.0026	4.79756	-0.484535
16.3	-70.0026	4.78012	-0.69119
16.32	-70.0026	4.75014	-0.896621
16.34	-70.0026	4.70697	-1.09986
16.36	-70.0026	4.65169	-1.30013
16.38	-70.0026	4.58698	-1.49681
16.4	-70.0026	4.51673	-1.68934
16.42	-70.0026	4.44553	-1.87712
16.44	-70.0026	4.37804	-2.05956
16.46	-70.0026	4.31834	-2.23601
16.48	-70.0026	4.26953	-2.40582
16.5	-70.0026	4.2335	-2.56831
16.52	-70.0026	4.21093	-2.72282
16.54	-70.0026	4.20156	-2.86861
16.56	-70.0026	4.20466	-3.00476
16.58	-70.0026	4.21952	-3.1301
16.6	-70.0026	4.246	-3.24296
16.62	-70.0026	4.28488	-3.34107
16.64	-70.0026	4.33806	-3.42147
16.66	-70.0026	4.40849	-3.48055
16.68	-70.0026	4.49984	-3.5142
16.7	-70.0026	4.61588	-3.51815
16.72	-70.0026	4.75986	-3.48839
16.74	-70.0026	4.93369	-3.42177
16.76	-70.0026	5.1373	-3.31652
16.78	-70.0026	5.36813	-3.17278
16.8	-70.0026	5.62094	-2.99294
16.82	-70.0026	5.88792	-2.78177
16.84	-70.0026	6.15915	-2.54631
16.86	-70.0026	6.42332	-2.29539
16.88	-70.0026	6.66872	-2.039
16.9	-70.0026	6.8842	-1.78743
16.92	-70.0026	7.06024	-1.55033
16.94	-70.0026	7.18971	-1.33575
16.96	-70.0026	7.26847	-1.14947
16.98	-70.0026	7.29554	-0.994448
17	-70.0026	7.27305	-0.870643
17.02	-70.0026	7.2058	-0.775231
17.04	-70.0026	7.10061	-0.703106
17.06	-70.0026	6.96555	-0.64768
17.08	-70.0026	6.8091	-0.601842
17.1	-70.0026	6.63943	-0.558952
17.12	-70.0026	6.4638	-0.513745
17.14	-70.0026	6.28808	-0.463024
17.16	-70.0026	6.11662	-0.406052
17.18	-70.0026	5.95213	-0.344595
17.2	-70.0026	5.79584	-0.282626
17.22	-70.0026	5.64771	-0.225737
17.24	-70.0026	5.50671	-0.180358
17.26	-70.0026	5.37119	-0.152883
17.28	-70.0026	5.23919	-0.148834
17.3	-70.0026	5.10878	-0.172163
17.32	-70.0026	4.97835	-0.22477
17.34	-70.0026	4.84689	-0.306304
17.36	-70.0026	4.71414	-0.414216
17.38	-70.0026	4.58074	-0.544058
17.4	-70.0026	4.44815	-0.689953
17.42	-70.0026	4.31863	-0.845162
17.44	-70.0026	4.19487	-1.00266
17.46	-70.0026	4.07971	-1.15569
17.48	-70.0026	3.97569	-1.29815
17.5	-70.0026	3.8846	-1.42491
17.52	-70.0026	3.80711	-1.53201
17.54	-70.0026	3.74251	-1.61669
17.56	-70.0026	3.68862	-1.67743
17.58	-70.0026	3.64196	-1.7139
17.6	-70.0026	3.5981	-1.72694
17.62	-70.0026	3.55222	-1.71858
17.64	-70.0026	3.49984	-1.692
17.66	-70.0026	3.43752	-1.65155
17.68	-70.0026	3.36352	-1.60271
17.7	-70.0026	3.27827	-1.55197
17.72	-70.0026	3.18451	-1.50659
17.74	-70.0026	3.08718	-1.47422
17.76	-70.0026	2.99286	-1.46236
17.78	-70.0026	2.90899	-1.47775
17.8	-70.0026	2.84283	-1.52562
17.82	-70.0026	2.80039	-1.60894
17.84	-70.0026	2.78547	-1.72783
17.86	-70.0026	2.79889	-1.87904
17.88	-70.0026	2.83815	-2.05582
17.9	-70.0026	2.89752	-2.24803
17.92	-70.0026	2.96856	-2.44268
17.94	-70.0026	3.04107	-2.62481
17.96	-70.0026	3.10436	-2.77868
17.98	-70.0026	3.14856	-2.88912
18	-70.0026	3.16596	-2.94298
18.02	-70.0026	3.15216	-2.93039
18.04	-70.0026	3.10673	-2.84582
18.06	-70.0026	3.03359	-2.68872
18.08	-70.0026	2.94069	-2.46371
18.1	-70.0026	2.83938	-2.18021
18.12	-70.0026	2.74328	-1.85168
18.14	-70.0026	2.66688	-1.49449
18.16	-70.0026	2.62402	-1.12653
18.18	-70.0026	2.62647	-0.765762
18.2	-70.0026	2.68259	-0.428853
18.22	-70.0026	2.79648	-0.130016
18.24	-70.0026	2.96749	0.119869
18.26	-70.0026	3.19025	0.313802
18.28	-70.0026	3.45519	0.44885
18.3	-70.0026	3.74949	0.526039
18.32	-70.0026	4.05836	0.549978
18.34	-70.0026	4.36643	0.528302
18.36	-70.0026	4.65925	0.470979
18.38	-70.0026	4.92454	0.389533
18.4	-70.0026	5.15324	0.296254
18.42	-70.0026	5.34012	0.203411
18.44	-70.0026	5.48405	0.122516
18.46	-70.0026	5.58771	0.0636521
18.48	-70.0026	5.65713	0.0348994
18.5	-70.0026	5.7007	0.0418857
18.52	-70.0026	5.72823	0.0874857
18.54	-70.0026	5.74975	0.171686
18.56	-70.0026	5.77442	0.291627
18.58	-70.0026	5.80959	0.441824
18.6	-70.0026	5.86002	0.61457
18.62	-70.0026	5.92735	0.80049
18.64	-70.0026	6.00992	0.989226
18.66	-70.0026	6.10291	1.1702
18.68	-70.0026	6.19878	1.33341
18.7	-70.0026	6.28803	1.47021
18.72	-70.0026	6.36023	1.57395
18.74	-70.0026	6.40522	1.64053
18.76	-70.0026	6.41433	1.66867
18.78	-70.0026	6.38156	1.66002
18.8	-70.0026	6.30447	1.61889
18.82	-70.0026	6.18475	1.55185
18.84	-70.0026	6.02823	1.46704
18.86	-70.0026	5.84447	1.37336
18.88	-70.0026	5.64577	1.27961
18.9	-70.0026	5.44583	1.19369
18.92	-70.0026	5.25822	1.12183
18.94	-70.0026	5.09483	1.06812
18.96	-70.0026	4.96461	1.03422
18.98	-70.0026	4.87265	1.01934
19	-70.0026	4.81988	1.0205
19.02	-70.0026	4.80328	1.03292
19.04	-70.0026	4.81668	1.05062
19.06	-70.0026	4.85178	1.06707
19.08	-70.0026	4.89944	1.07578
19.1	-70.0026	4.95077	1.07094
19.12	-70.0026	4.99807	1.0478
19.14	-70.0026	5.03527	1.00299
19.16	-70.0026	5.0581	0.93469
19.18	-70.0026	5.06376	0.842571
19.2	-70.0026	5.05047	0.727661
19.22	-70.0026	5.01698	0.59209
19.24	-70.0026	4.96212	0.438781
19.26	-70.0026	4.88469	0.271107
19.28	-70.0026	4.78355	0.0925618
19.3	-70.0026	4.65812	-0.0935478
19.32	-70.0026	4.50893	-0.284333
19.34	-70.0026	4.3383	-0.477486
19.36	-70.0026	4.15082	-0.671355
19.38	-70.0026	3.95363	-0.864941
19.4	-70.0026	3.7562	-1.05781
19.42	-70.0026	3.5698	-1.2499
19.44	-70.0026	3.40662	-1.44135
19.46	-70.0026	3.27852	-1.63217
19.48	-70.0026	3.19591	-1.82206
19.5	-70.0026	3.16652	-2.01015
19.52	-70.0026	3.19458	-2.19492
19.54	-70.0026	3.28032	-2.37414
19.56	-70.0026	3.4199	-2.54504
19.58	-70.0026	3.60583	-2.70452
19.6	-70.0026	3.82766	-2.84956
19.62	-70.0026	4.07305	-2.97765
19.64	-70.0026	4.32885	-3.08715
19.66	-70.0026	4.58226	-3.17766
19.68	-70.0026	4.8218	-3.25021
19.7	-70.0026	5.03803	-3.30716
19.72	-70.0026	5.22409	-3.352
19.74	-70.0026	5.37579	-3.38885
19.76	-70.0026	5.49151	-3.42188
19.78	-70.0026	5.57186	-3.45466
19.8	-70.0026	5.61911	-3.48962
19.82	-70.0026	5.63662	-3.52762
19.84	-70.0026	5.62817	-3.56786
19.86	-70.0026	5.59746	-3.60795
19.88	-70.0026	5.54767	-3.64439
19.9	-70.0026	5.48123	-3.67319
19.92	-70.0026	5.39979	-3.69057
19.94	-70.0026	5.30431	-3.69373
19.96	-70.0026	5.19535	-3.6814
19.98	-70.0026	5.07345	-3.65423
20	-70.0026	4.93952	-3.61481
20.02	-70.0026	4.7952	-3.56746
20.04	-70.0026	4.64313	-3.5177
20.06	-70.0026	4.4871	-3.47156
20.08	-70.0026	4.33203	-3.43483
20.1	-70.0026	4.18378	-3.41233
20.12	-70.0026	4.04882	-3.40733
20.14	-70.0026	3.93381	-3.42122
20.16	-70.0026	3.84504	-3.45336
20.18	-70.0026	3.78795	-3.50129
20.2	-70.0026	3.76658	-3.56105
20.22	-70.0026	3.78324	-3.6277
20.24	-70.0026	3.83818	-3.69583
20.26	-70.0026	3.9295	-3.76009
20.28	-70.0026	4.05327	-3.81559
20.3	-70.0026	4.20371	-3.85824
20.32	-70.0026	4.37366	-3.88482
20.34	-70.0026	4.55508	-3.89306
20.36	-70.0026	4.73962	-3.88157
20.38	-70.0026	4.91925	-3.84971
20.4	-70.0026	5.08677	-3.79749
20.42	-70.0026	5.23627	-3.72545
20.44	-70.0026	5.36341	-3.63458
20.46	-70.0026	5.46556	-3.52624
20.48	-70.0026	5.54182	-3.40212
20.5	-70.0026	5.59285	-3.26419
20.52	-70.0026	5.62061	-3.1146
20.54	-70.0026	5.62806	-2.95562
20.56	-70.0026	5.6188	-2.78957
20.58	-70.0026	5.59677	-2.61878
20.6	-70.0026	5.5659	-2.44558
20.62	-70.0026	5.52985	-2.27236
20.64	-70.0026	5.49184	-2.10164
20.66	-70.0026	5.45446	-1.93616
20.68	-70.0026	5.41961	-1.779
20.7	-70.0026	5.38843	-1.63354
20.72	-70.0026	5.36128	-1.50346
20.74	-70.0026	5.33781	-1.39244
20.76	-70.0026	5.31693	-1.30394
20.78	-70.0026	5.29695	-1.24078
20.8	-70.0026	5.2756	-1.20474
20.82	-70.0026	5.25019	-1.19622
20.84	-70.0026	5.21773	-1.21399
20.86	-70.0026	5.17507	-1.25508
20.88	-70.0026	5.11916	-1.3149
20.9	-70.0026	5.04723	-1.38745
20.92	-70.0026	4.95712	-1.46576
20.94	-70.0026	4.84751	-1.54228
20.96	-70.0026	4.71823	-1.60933
20.98	-70.0026	4.57045	-1.65955
21	-70.0026	4.4068	-1.68612
21.02	-70.0026	4.2314	-1.68304
21.04	-70.0026	4.04963	-1.64518
21.06	-70.0026	3.86791	-1.56833
21.08	-70.0026	3.6932	-1.4493
21.1	-70.0026	3.53246	-1.28598
21.12	-70.0026	3.39206	-1.07752
21.14	-70.0026	3.27725	-0.824547
21.16	-70.0026	3.19159	-0.529447
21.18	-70.0026	3.13672	-0.196677
21.2	-70.0026	3.11209	0.167025
21.22	-70.0026	3.11509	0.552539
21.24	-70.0026	3.14127	0.948479
21.26	-70.0026	3.18473	1.34153
21.28	-70.0026	3.23863	1.71707
21.3	-70.0026	3.29582	2.06
21.32	-70.0026	3.34941	2.35575
21.34	-70.0026	3.39332	2.5914
21.36	-70.0026	3.42273	2.75675
21.38	-70.0026	3.43438	2.84527
21.4	-70.0026	3.42678	2.85472
21.42	-70.0026	3.40018	2.78753
21.44	-70.0026	3.35646	2.65074
21.46	-70.0026	3.29886	2.4555
21.48	-70.0026	3.23157	2.21629
21.5	-70.0026	3.15936	1.94981
21.52	-70.0026	3.08711	1.67371
21.54	-70.0026	3.01941	1.40529
21.56	-70.0026	2.96018	1.16031
21.58	-70.0026	2.91249	0.951956
21.6	-70.0026	2.87843	0.790113
21.62	-70.0026	2.85908	0.680986
21.64	-70.0026	2.85465	0.627004
21.66	-70.0026	2.86468	0.627053
21.68	-70.0026	2.88826	0.676935
21.7	-70.0026	2.92431	0.769996
21.72	-70.0026	2.97178	0.897824
21.74	-70.0026	3.02984	1.05096
21.76	-70.0026	3.09802	1.21955
21.78	-70.0026	3.17621	1.39391
21.8	-70.0026	3.26465	1.56501
21.82	-70.0026	3.36383	1.72476
21.84	-70.0026	3.47432	1.86634
21.86	-70.0026	3.59659	1.98432
21.88	-70.0026	3.73078	2.07484
21.9	-70.0026	3.8765	2.13567
21.92	-70.0026	4.03268	2.16627
21.94	-70.0026	4.19741	2.16775
21.96	-70.0026	4.36796	2.14279
21.98	-70.0026	4.54084	2.09542
22	-70.0026	4.71192	2.03072
22.02	-70.0026	4.87672	1.95431
22.04	-70.0026	5.03067	1.87186
22.06	-70.0026	5.16945	1.78847
22.08	-70.0026	5.28928	1.70807
22.1	-70.0026	5.38714	1.63292
22.12	-70.0026	5.46094	1.56333
22.14	-70.0026	5.50957	1.49754
22.16	-70.0026	5.53289	1.43192
22.18	-70.0026	5.53165	1.36142
22.2	-70.0026	5.50732	1.28024
22.22	-70.0026	5.46202	1.18263
22.24	-70.0026	5.3983	1.06374
22.26	-70.0026	5.31907	0.920372
22.28	-70.0026	5.22741	0.751548
22.3	-70.0026	5.12651	0.558827
22.32	-70.0026	5.01947	0.346322
22.34	-70.0026	4.90918	0.120423
22.36	-70.0026	4.79818	-0.11075
22.38	-70.0026	4.68855	-0.338091
22.4	-70.0026	4.58186	-0.552352
22.42	-70.0026	4.4792	-0.745017
22.44	-70.0026	4.38126	-0.909114
22.46	-70.0026	4.2886	-1.0399
22.48	-70.0026	4.20184	-1.13536
22.5	-70.0026	4.12203	-1.19647
22.52	-70.0026	4.05079	-1.22721
22.54	-70.0026	3.99047	-1.23432
22.56	-70.0026	3.94416	-1.22679
22.58	-70.0026	3.9154	-1.21516
22.6	-70.0026	3.90791	-1.21061
22.62	-70.0026	3.92503	-1.22399
22.64	-70.0026	3.96924	-1.26476
22.66	-70.0026	4.04159	-1.34007
22.68	-70.0026	4.14131	-1.45402
22.7	-70.0026	4.26559	-1.6071
22.72	-70.0026	4.40951	-1.79601
22.74	-70.0026	4.56625	-2.01379
22.76	-70.0026	4.72745	-2.25028
22.78	-70.0026	4.88379	-2.49285
22.8	-70.0026	5.02562	-2.72733
22.82	-70.0026	5.14364	-2.93907
22.84	-70.0026	5.22954	-3.11396
22.86	-70.0026	5.27663	-3.23951
22.88	-70.0026	5.28029	-3.30565
22.9	-70.0026	5.23833	-3.30544
22.92	-70.0026	5.15114	-3.23559
22.94	-70.0026	5.02179	-3.09677
22.96	-70.0026	4.8558	-2.89364
22.98	-70.0026	4.66094	-2.63478
23	-70.0026	4.44667	-2.33233
23.02	-70.0026	4.22358	-2.00132
23.04	-70.0026	4.00267	-1.65894
23.06	-70.0026	3.7945	-1.32337
23.08	-70.0026	3.60848	-1.01259
23.1	-70.0026	3.45206	-0.742962
23.12	-70.0026	3.33018	-0.52786
23.14	-70.0026	3.24489	-0.376465
23.16	-70.0026	3.19518	-0.292817
23.18	-70.0026	3.17718	-0.275333
23.2	-70.0026	3.18452	-0.316859
23.22	-70.0026	3.20898	-0.405314
23.24	-70.0026	3.24131	-0.524881
23.26	-70.0026	3.2721	-0.657626
23.28	-70.0026	3.29268	-0.785368
23.3	-70.0026	3.29592	-0.891572
23.32	-70.0026	3.27691	-0.96303
23.34	-70.0026	3.23337	-0.991119
23.36	-70.0026	3.16588	-0.972491
23.38	-70.0026	3.07777	-0.909127
23.4	-70.0026	2.97482	-0.807795
23.42	-70.0026	2.8647	-0.679005
23.44	-70.0026	2.75619	-0.535646
23.46	-70.0026	2.65839	-0.391507
23.48	-70.0026	2.57974	-0.259882
23.5	-70.0026	2.52732	-0.152427
23.52	-70.0026	2.50608	-0.0783691
23.54	-70.0026	2.51847	-0.0441186
23.56	-70.0026	2.56431	-0.0532436
23.58	-70.0026	2.64092	-0.106745
23.6	-70.0026	2.74362	-0.203513
23.62	-70.0026	2.86636	-0.340858
23.64	-70.0026	3.00259	-0.515003
23.66	-70.0026	3.14607	-0.721493
23.68	-70.0026	3.29158	-0.955465
23.7	-70.0026	3.43552	-1.2118
23.72	-70.0026	3.57615	-1.4852
23.74	-70.0026	3.71361	-1.7702
23.76	-70.0026	3.84962	-2.06124
23.78	-70.0026	3.98698	-2.35277
23.8	-70.0026	4.12893	-2.63944
23.82	-70.0026	4.27847	-2.91641
23.84	-70.0026	4.43775	-3.17965
23.86	-70.0026	4.60757	-3.42634
23.88	-70.0026	4.78717	-3.65513
23.9	-70.0026	4.97413	-3.86632
23.92	-70.0026	5.16457	-4.06189
23.94	-70.0026	5.35356	-4.24525
23.96	-70.0026	5.5356	-4.42091
23.98	-70.0026	5.70516	-4.59382
24	-70.0026	5.85726	-4.76873
24.02	-70.0026	5.98791	-4.9494
24.04	-70.0026	6.0944	-5.13801
24.06	-70.0026	6.17546	-5.33459
24.08	-70.0026	6.23119	-5.53687
24.1	-70.0026	6.26285	-5.74028
24.12	-70.0026	6.27258	-5.93831
24.14	-70.0026	6.26293	-6.12317
24.16	-70.0026	6.23659	-6.28653
24.18	-70.0026	6.19598	-6.42041
24.2	-70.0026	6.14314	-6.51795
24.22	-70.0026	6.07963	-6.57401
24.24	-70.0026	6.00665	-6.5856
24.26	-70.0026	5.92529	-6.55191
24.28	-70.0026	5.83675	-6.47415
24.3	-70.0026	5.74277	-6.35515
24.32	-70.0026	5.64579	-6.19881
24.34	-70.0026	5.54922	-6.00955
24.36	-70.0026	5.4574	-5.7918
24.38	-70.0026	5.37549	-5.54967
24.4	-70.0026	5.30913	-5.28675
24.42	-70.0026	5.26402	-5.00616
24.44	-70.0026	5.24529	-4.71069
24.46	-70.0026	5.25696	-4.4031
24.48	-70.0026	5.30136	-4.08638
24.5	-70.0026	5.3786	-3.76402
24.52	-70.0026	5.48636	-3.44014
24.54	-70.0026	5.61969	-3.11956
24.56	-70.0026	5.7713	-2.80765
24.58	-70.0026	5.93188	-2.51018
24.6	-70.0026	6.09078	-2.23294
24.62	-70.0026	6.23687	-1.98146
24.64	-70.0026	6.35946	-1.76063
24.66	-70.0026	6.44923	-1.57431
24.68	-70.0026	6.49912	-1.42504
24.7	-70.0026	6.50499	-1.31375
24.72	-70.0026	6.46596	-1.23955
24.74	-70.0026	6.38447	-1.19961
24.76	-70.0026	6.26595	-1.18915
24.78	-70.0026	6.11818	-1.20153
24.8	-70.0026	5.95033	-1.22851
24.82	-70.0026	5.77191	-1.2607
24.84	-70.0026	5.59171	-1.28811
24.86	-70.0026	5.4168	-1.30086
24.88	-70.0026	5.25192	-1.28999
24.9	-70.0026	5.09908	-1.2482
24.92	-70.0026	4.95771	-1.17062
24.94	-70.0026	4.82508	-1.05532
24.96	-70.0026	4.69711	-0.903678
24.98	-70.0026	4.56939	-0.720384
25	-70.0026	4.43816	-0.513192
25.02	-70.0026	4.30125	-0.292342
25.04	-70.0026	4.15876	-0.0697464
25.06	-70.0026	4.01333	0.142005
25.08	-70.0026	3.87008	0.330706
25.1	-70.0026	3.73611	0.485562
25.12	-70.0026	3.61969	0.598083
25.14	-70.0026	3.52932	0.662736
25.16	-70.0026	3.47256	0.677305
25.18	-70.0026	3.45516	0.642941
25.2	-70.0026	3.48017	0.563898
25.22	-70.0026	3.54747	0.447017
25.24	-70.0026	3.65362	0.301022
25.26	-70.0026	3.79204	0.13573
25.28	-70.0026	3.95354	-0.0387338
25.3	-70.0026	4.12713	-0.212647
25.32	-70.0026	4.30099	-0.377259
25.34	-70.0026	4.46352	-0.525205
25.36	-70.0026	4.60443	-0.650768
25.38	-70.0026	4.71568	-0.750008
25.4	-70.0026	4.79215	-0.820806
25.42	-70.0026	4.83213	-0.862869
25.44	-70.0026	4.83746	-0.877701
25.46	-70.0026	4.81326	-0.868552
25.48	-70.0026	4.76742	-0.840326
25.5	-70.0026	4.7098	-0.799411
25.52	-70.0026	4.65125	-0.753383
25.54	-70.0026	4.60251	-0.710571
25.56	-70.0026	4.57322	-0.679453
25.58	-70.0026	4.57098	-0.667925
25.6	-70.0026	4.6007	-0.682492
25.62	-70.0026	4.66419	-0.72749
25.64	-70.0026	4.76005	-0.804426
25.66	-70.0026	4.8839	-0.911561
25.68	-70.0026	5.02883	-1.04382
25.7	-70.0026	5.18596	-1.19306
25.72	-70.0026	5.34523	-1.34877
25.74	-70.0026	5.49617	-1.49904
25.76	-70.0026	5.62858	-1.63178
25.78	-70.0026	5.73318	-1.73602
25.8	-70.0026	5.8022	-1.80312
25.82	-70.0026	5.82971	-1.82775
25.84	-70.0026	5.81194	-1.80855
25.86	-70.0026	5.74744	-1.74821
25.88	-70.0026	5.6371	-1.65328
25.9	-70.0026	5.48409	-1.53337
25.92	-70.0026	5.29366	-1.40014
25.94	-70.0026	5.07286	-1.26612
25.96	-70.0026	4.83018	-1.14344
25.98	-70.0026	4.57506	-1.04281
26	-70.0026	4.31738	-0.972681
26.02	-70.0026	4.06696	-0.938886
26.04	-70.0026	3.83304	-0.944516
26.06	-70.0026	3.6238	-0.990192
26.08	-70.0026	3.44607	-1.07452
26.1	-70.0026	3.30501	-1.19467
26.12	-70.0026	3.20402	-1.34689
26.14	-70.0026	3.14468	-1.52689
26.16	-70.0026	3.12675	-1.73012
26.18	-70.0026	3.14827	-1.95173
26.2	-70.0026	3.20565	-2.18649
26.22	-70.0026	3.29379	-2.42862
26.24	-70.0026	3.40625	-2.67158
26.26	-70.0026	3.53545	-2.90809
26.28	-70.0026	3.67295	-3.13016
26.3	-70.0026	3.80984	-3.32946
26.32	-70.0026	3.93727	-3.49769
26.34	-70.0026	4.04698	-3.62718
26.36	-70.0026	4.13197	-3.71144
26.38	-70.0026	4.1871	-3.74571
26.4	-70.0026	4.20964	-3.72736
26.42	-70.0026	4.19956	-3.65614
26.44	-70.0026	4.15963	-3.53428
26.46	-70.0026	4.09522	-3.36638
26.48	-70.0026	4.01381	-3.15916
26.5	-70.0026	3.9242	-2.92105
26.52	-70.0026	3.83565	-2.66181
26.54	-70.0026	3.75688	-2.39195
26.56	-70.0026	3.69519	-2.12225
26.58	-70.0026	3.65566	-1.86323
26.6	-70.0026	3.64074	-1.62464
26.62	-70.0026	3.65006	-1.4151
26.64	-70.0026	3.68061	-1.24166
26.66	-70.0026	3.72719	-1.10962
26.68	-70.0026	3.78314	-1.0223
26.7	-70.0026	3.84118	-0.981043
26.72	-70.0026	3.89433	-0.985295
26.74	-70.0026	3.93678	-1.03275
26.76	-70.0026	3.96457	-1.11965
26.78	-70.0026	3.97611	-1.24111
26.8	-70.0026	3.97246	-1.39155
26.82	-70.0026	3.95719	-1.56505
26.84	-70.0026	3.93608	-1.75587
26.86	-70.0026	3.91652	-1.95874
26.88	-70.0026	3.90663	-2.16931
26.9	-70.0026	3.91429	-2.38435
26.92	-70.0026	3.94619	-2.60193
26.94	-70.0026	4.00687	-2.82146
26.96	-70.0026	4.09801	-3.04357
26.98	-70.0026	4.21798	-3.26976
27	-70.0026	4.36182	-3.50196
27.02	-70.0026	4.52153	-3.74196
27.04	-70.0026	4.68678	-3.99069
27.06	-70.0026	4.84595	-4.24757
27.08	-70.0026	4.98726	-4.50993
27.1	-70.0026	5.10002	-4.77266
27.12	-70.0026	5.17571	-5.02805
27.14	-70.0026	5.20883	-5.26603
27.16	-70.0026	5.19743	-5.47475
27.18	-70.0026	5.14315	-5.64143
27.2	-70.0026	5.05099	-5.7534
27.22	-70.0026	4.92864	-5.79933
27.24	-70.0026	4.78562	-5.77031
27.26	-70.0026	4.6323	-5.66078
27.28	-70.0026	4.47884	-5.46917
27.3	-70.0026	4.33431	-5.19811
27.32	-70.0026	4.20587	-4.85426
27.34	-70.0026	4.09832	-4.44779
27.36	-70.0026	4.01372	-3.99159
27.38	-70.0026	3.95146	-3.50031
27.4	-70.0026	3.90838	-2.98945
27.42	-70.0026	3.87929	-2.4745
27.44	-70.0026	3.8575	-1.97026
27.46	-70.0026	3.83556	-1.49041
27.48	-70.0026	3.80604	-1.04723
27.5	-70.0026	3.76229	-0.651423
27.52	-70.0026	3.69914	-0.312043
27.54	-70.0026	3.6135	-0.0363178
27.56	-70.0026	3.50467	0.17057
27.58	-70.0026	3.37457	0.305808
27.6	-70.0026	3.22765	0.369325
27.62	-70.0026	3.07062	0.364129
27.64	-70.0026	2.91194	0.296515
27.66	-70.0026	2.76129	0.17603
27.68	-70.0026	2.62882	0.0151231
27.7	-70.0026	2.52447	-0.171553
27.72	-70.0026	2.45731	-0.368153
27.74	-70.0026	2.4349	-0.558877
27.76	-70.0026	2.46283	-0.729312
27.78	-70.0026	2.54435	-0.867699
27.8	-70.0026	2.68015	-0.965977
27.82	-70.0026	2.8683	-1.02045
27.84	-70.0026	3.10435	-1.03202
27.86	-70.0026	3.38161	-1.00595
27.88	-70.0026	3.69149	-0.951169
27.9	-70.0026	4.02406	-0.879245
27.92	-70.0026	4.36858	-0.803187
27.94	-70.0026	4.71416	-0.736142
27.96	-70.0026	5.0503	-0.690205
27.98	-70.0026	5.36744	-0.675431
28	-70.0026	5.65731	-0.699123
28.02	-70.0026	5.91326	-0.765443
28.04	-70.0026	6.13028	-0.875331
28.06	-70.0026	6.305	-1.0267
28.08	-70.0026	6.43555	-1.21482
28.1	-70.0026	6.52126	-1.43287
28.12	-70.0026	6.56251	-1.67254
28.14	-70.0026	6.56041	-1.92464
28.16	-70.0026	6.51665	-2.1797
28.18	-70.0026	6.43336	-2.42846
28.2	-70.0026	6.31314	-2.66236
28.22	-70.0026	6.15903	-2.87384
28.24	-70.0026	5.97468	-3.05669
28.26	-70.0026	5.76443	-3.20617
28.28	-70.0026	5.53347	-3.31921
28.3	-70.0026	5.28789	-3.39442
28.32	-70.0026	5.03472	-3.43215
28.34	-70.0026	4.78179	-3.43445
28.36	-70.0026	4.53747	-3.40494
28.38	-70.0026	4.31029	-3.34872
28.4	-70.0026	4.10844	-3.27211
28.42	-70.0026	3.93915	-3.18234
28.44	-70.0026	3.80805	-3.08724
28.46	-70.0026	3.71867	-2.99468
28.48	-70.0026	3.67192	-2.91208
28.5	-70.0026	3.666	-2.84589
28.52	-70.0026	3.69639	-2.801
28.54	-70.0026	3.75624	-2.78029
28.56	-70.0026	3.83703	-2.78437
28.58	-70.0026	3.92936	-2.8114
28.6	-70.0026	4.0239	-2.85721
28.62	-70.0026	4.11227	-2.91567
28.64	-70.0026	4.18784	-2.97918
28.66	-70.0026	4.24618	-3.03938
28.68	-70.0026	4.28535	-3.08786
28.7	-70.0026	4.30577	-3.11689
28.72	-70.0026	4.30983	-3.12008
28.74	-70.0026	4.30139	-3.09275
28.76	-70.0026	4.28506	-3.03222
28.78	-70.0026	4.26559	-2.93784
28.8	-70.0026	4.2473	-2.81082
28.82	-70.0026	4.23369	-2.65401
28.84	-70.0026	4.22728	-2.47154
28.86	-70.0026	4.22952	-2.26847
28.88	-70.0026	4.241	-2.05048
28.9	-70.0026	4.26157	-1.82362
28.92	-70.0026	4.29059	-1.59409
28.94	-70.0026	4.32714	-1.36807
28.96	-70.0026	4.37006	-1.15153
28.98	-70.0026	4.41807	-0.950037
29	-70.0026	4.46962	-0.76852
29.02	-70.0026	4.52295	-0.611038
29.04	-70.0026	4.57589	-0.48054
29.06	-70.0026	4.62597	-0.378704
29.08	-70.0026	4.67041	-0.30588
29.1	-70.0026	4.70631	-0.261176
29.12	-70.0026	4.73092	-0.242713
29.14	-70.0026	4.74193	-0.24801
29.16	-70.0026	4.73782	-0.274472
29.18	-70.0026	4.71812	-0.319879
29.2	-70.0026	4.68358	-0.382811
29.22	-70.0026	4.63618	-0.4629
29.24	-70.0026	4.57897	-0.560872
29.26	-70.0026	4.51575	-0.678335
29.28	-70.0026	4.45058	-0.817328
29.3	-70.0026	4.38733	-0.979696
29.32	-70.0026	4.32912	-1.16639
29.34	-70.0026	4.27799	-1.37676
29.36	-70.0026	4.23467	-1.60804
29.38	-70.0026	4.1986	-1.85502
29.4	-70.0026	4.16819	-2.11004
29.42	-70.0026	4.14126	-2.3633
29.44	-70.0026	4.1156	-2.60344
29.46	-70.0026	4.08953	-2.81843
29.48	-70.0026	4.0624	-2.99651
29.5	-70.0026	4.03492	-3.12724
29.52	-70.0026	4.00917	-3.2024
29.54	-70.0026	3.98847	-3.21675
29.56	-70.0026	3.97684	-3.16853
29.58	-70.0026	3.97842	-3.05962
29.6	-70.0026	3.99677	-2.89543
29.62	-70.0026	4.03415	-2.68447
29.64	-70.0026	4.091	-2.43772
29.66	-70.0026	4.1657	-2.16781
29.68	-70.0026	4.25454	-1.88807
29.7	-70.0026	4.3521	-1.61169
29.72	-70.0026	4.45175	-1.35079
29.74	-70.0026	4.5465	-1.11577
29.76	-70.0026	4.62976	-0.914787
29.78	-70.0026	4.69614	-0.75341
29.8	-70.0026	4.74203	-0.634619
29.82	-70.0026	4.76593	-0.558965
29.84	-70.0026	4.76846	-0.524963
29.86	-70.0026	4.75215	-0.529627
29.88	-70.0026	4.72086	-0.569069
29.9	-70.0026	4.67917	-0.639089
29.92	-70.0026	4.63171	-0.735644
29.94	-70.0026	4.58255	-0.855126
29.96	-70.0026	4.5348	-0.994403
29.98	-70.0026	4.49045	-1.15061
30	-70.0026	4.45044	-1.32075
30.02	-70.0026	4.41496	-1.50119
30.04	-70.0026	4.38385	-1.68713
30.06	-70.0026	4.35705	-1.87229
30.08	-70.0026	4.33492	-2.04882
30.1	-70.0026	4.31842	-2.20755
30.12	-70.0026	4.30906	-2.33865
30.14	-70.0026	4.3086	-2.43256
30.16	-70.0026	4.31868	-2.48111
30.18	-70.0026	4.34021	-2.47867
30.2	-70.0026	4.37299	-2.42305
30.22	-70.0026	4.4153	-2.31612
30.24	-70.0026	4.46384	-2.16388
30.26	-70.0026	4.5139	-1.97605
30.28	-70.0026	4.55978	-1.7651
30.3	-70.0026	4.59548	-1.54503
30.32	-70.0026	4.61543	-1.32983
30.34	-70.0026	4.61526	-1.13215
30.36	-70.0026	4.59238	-0.962049
30.38	-70.0026	4.54642	-0.826303
30.4	-70.0026	4.47929	-0.728087
30.42	-70.0026	4.39499	-0.667201
30.44	-70.0026	4.29918	-0.640686
30.46	-70.0026	4.19852	-0.643718
30.48	-70.0026	4.09994	-0.670592
30.5	-70.0026	4.00995	-0.715643
30.52	-70.0026	3.93404	-0.773969
30.54	-70.0026	3.8763	-0.841854
30.56	-70.0026	3.83919	-0.916898
30.58	-70.0026	3.8236	-0.997855
30.6	-70.0026	3.82903	-1.08426
30.62	-70.0026	3.85397	-1.17598
30.64	-70.0026	3.89624	-1.2727
30.66	-70.0026	3.95344	-1.37355
30.68	-70.0026	4.02326	-1.47679
30.7	-70.0026	4.1037	-1.57978
30.72	-70.0026	4.19322	-1.67896
30.74	-70.0026	4.29072	-1.77015
30.76	-70.0026	4.39555	-1.84884
30.78	-70.0026	4.50733	-1.91062
30.8	-70.0026	4.62584	-1.95164
30.82	-70.0026	4.75093	-1.96908
30.84	-70.0026	4.88236	-1.96151
30.86	-70.0026	5.01977	-1.92925
30.88	-70.0026	5.16259	-1.87454
30.9	-70.0026	5.30996	-1.80155
30.92	-70.0026	5.46062	-1.7162
30.94	-70.0026	5.61286	-1.62583
30.96	-70.0026	5.76434	-1.53856
30.98	-70.0026	5.91203	-1.46261
31	-70.0026	6.05212	-1.40542
31.02	-70.0026	6.18013	-1.37283
31.04	-70.0026	6.291	-1.36825
31.06	-70.0026	6.37942	-1.39204
31.08	-70.0026	6.44023	-1.44111
31.1	-70.0026	6.46886	-1.50884
31.12	-70.0026	6.46184	-1.58535
31.14	-70.0026	6.41721	-1.65808
31.16	-70.0026	6.33485	-1.71276
31.18	-70.0026	6.21657	-1.73455
31.2	-70.0026	6.06609	-1.70938
31.22	-70.0026	5.88881	-1.62532
31.24	-70.0026	5.69137	-1.47386
31.26	-70.0026	5.48123	-1.25096
31.28	-70.0026	5.26611	-0.957855
31.3	-70.0026	5.0536	-0.60138
31.32	-70.0026	4.85079	-0.193888
31.34	-70.0026	4.66398	0.247302
31.36	-70.0026	4.49861	0.700899
31.38	-70.0026	4.3592	1.14299
31.4	-70.0026	4.24938	1.54866
31.42	-70.0026	4.17185	1.89372
31.44	-70.0026	4.1284	2.15645
31.46	-70.0026	4.1198	2.31914
31.48	-70.0026	4.14568	2.36936
31.5	-70.0026	4.20432	2.30083
31.52	-70.0026	4.29254	2.11385
31.54	-70.0026	4.40559	1.81522
31.56	-70.0026	4.53725	1.41772
31.58	-70.0026	4.67998	0.939257
31.6	-70.0026	4.82534	0.401623
31.62	-70.0026	4.96443	-0.170857
31.64	-70.0026	5.08851	-0.752782
31.66	-70.0026	5.18954	-1.31909
31.68	-70.0026	5.26072	-1.84637
31.7	-70.0026	5.29685	-2.31396
31.72	-70.0026	5.2945	-2.70486
31.74	-70.0026	5.25214	-3.00639
31.76	-70.0026	5.16996	-3.21062
31.78	-70.0026	5.04975	-3.31454
31.8	-70.0026	4.8947	-3.32002
31.82	-70.0026	4.70921	-3.23346
31.84	-70.0026	4.49885	-3.06536
31.86	-70.0026	4.27024	-2.82946
31.88	-70.0026	4.03107	-2.5419
31.9	-70.0026	3.79002	-2.2201
31.92	-70.0026	3.55656	-1.88155
31.94	-70.0026	3.34064	-1.54279
31.96	-70.0026	3.15222	-1.21827
31.98	-70.0026	3.00055	-0.919676
32	-70.0026	2.89351	-0.65538
32.02	-70.0026	2.83686	-0.430384
32.04	-70.0026	2.83367	-0.24656
32.06	-70.0026	2.88393	-0.103214
32.08	-70.0026	2.98456	0.00213693
32.1	-70.0026	3.12972	0.0728919
32.12	-70.0026	3.31141	0.112551
32.14	-70.0026	3.52037	0.124064
32.16	-70.0026	3.74712	0.109446
32.18	-70.0026	3.98289	0.0696709
32.2	-70.0026	4.22053	0.00483598
32.22	-70.0026	4.45503	-0.0854695
32.24	-70.0026	4.68372	-0.201694
32.26	-70.0026	4.90609	-0.343854
32.28	-70.0026	5.12332	-0.511169
32.3	-70.0026	5.3375	-0.70187
32.32	-70.0026	5.55078	-0.913196
32.34	-70.0026	5.76449	-1.14156
32.36	-70.0026	5.97844	-1.3828
32.38	-70.0026	6.19054	-1.63252
32.4	-70.0026	6.39669	-1.8863
32.42	-70.0026	6.59099	-2.13988
32.44	-70.0026	6.76635	-2.38913
32.46	-70.0026	6.91527	-2.62988
32.48	-70.0026	7.03071	-2.85771
32.5	-70.0026	7.10696	-3.06766
32.52	-70.0026	7.14042	-3.25408
32.54	-70.0026	7.13	-3.41052
32.56	-70.0026	7.07741	-3.53
32.58	-70.0026	6.98695	-3.60535
32.6	-70.0026	6.86514	-3.62994
32.62	-70.0026	6.72006	-3.59842
32.64	-70.0026	6.56057	-3.50759
32.66	-70.0026	6.39554	-3.3572
32.68	-70.0026	6.23313	-3.15047
32.7	-70.0026	6.08023	-2.89436
32.72	-70.0026	5.94216	-2.59942
32.74	-70.0026	5.82252	-2.2792
32.76	-70.0026	5.72335	-1.94936
32.78	-70.0026	5.64536	-1.62634
32.8	-70.0026	5.58834	-1.32606
32.82	-70.0026	5.55145	-1.06249
32.84	-70.0026	5.53363	-0.84644
32.86	-70.0026	5.53373	-0.684677
32.88	-70.0026	5.55066	-0.579431
32.9	-70.0026	5.58329	-0.528403
32.92	-70.0026	5.63041	-0.525238
32.94	-70.0026	5.69061	-0.560406
32.96	-70.0026	5.76216	-0.622387
32.98	-70.0026	5.84306	-0.698997
33	-70.0026	5.93117	-0.778715
33.02	-70.0026	6.02439	-0.851859
33.04	-70.0026	6.12096	-0.911466
33.06	-70.0026	6.21971	-0.953816
33.08	-70.0026	6.32026	-0.978539
33.1	-70.0026	6.42304	-0.98835
33.12	-70.0026	6.5292	-0.988457
33.14	-70.0026	6.64029	-0.985753
33.16	-70.0026	6.75784	-0.987897
33.18	-70.0026	6.88292	-1.00241
33.2	-70.0026	7.01564	-1.03587
33.22	-70.0026	7.15492	-1.09332
33.24	-70.0026	7.29834	-1.17785
33.26	-70.0026	7.44228	-1.29046
33.28	-70.0026	7.58226	-1.43001
33.3	-70.0026	7.71342	-1.59343
33.32	-70.0026	7.83117	-1.77599
33.34	-70.0026	7.93164	-1.97154
33.36	-70.0026	8.01217	-2.17296
33.38	-70.0026	8.0715	-2.37243
33.4	-70.0026	8.10972	-2.56186
33.42	-70.0026	8.1281	-2.73331
33.44	-70.0026	8.1286	-2.8794
33.46	-70.0026	8.11338	-2.99376
33.48	-70.0026	8.08429	-3.07149
33.5	-70.0026	8.04239	-3.10949
33.52	-70.0026	7.9877	-3.10676
33.54	-70.0026	7.91905	-3.0645
33.56	-70.0026	7.83417	-2.986
33.58	-70.0026	7.72998	-2.87637
33.6	-70.0026	7.60295	-2.742
33.62	-70.0026	7.44961	-2.59002
33.64	-70.0026	7.26704	-2.42756
33.66	-70.0026	7.05338	-2.26111
33.68	-70.0026	6.80829	-2.09599
33.7	-70.0026	6.53324	-1.93599
33.72	-70.0026	6.23181	-1.78316
33.74	-70.0026	5.90974	-1.63801
33.76	-70.0026	5.57491	-1.49968
33.78	-70.0026	5.23708	-1.36648
33.8	-70.0026	4.90754	-1.2364
33.82	-70.0026	4.59852	-1.10763
33.84	-70.0026	4.32253	-0.979114
33.86	-70.0026	4.09153	-0.850891
33.88	-70.0026	3.91617	-0.724324
33.9	-70.0026	3.80493	-0.602164
33.92	-70.0026	3.76347	-0.488422
33.94	-70.0026	3.79413	-0.388109
33.96	-70.0026	3.89567	-0.306859
33.98	-70.0026	4.06323	-0.250473
34	-70.0026	4.28867	-0.224456
34.02	-70.0026	4.56107	-0.233551
34.04	-70.0026	4.86743	-0.281339
34.06	-70.0026	5.19358	-0.369917
34.08	-70.0026	5.52511	-0.499688
34.1	-70.0026	5.84822	-0.669248
34.12	-70.0026	6.15061	-0.875397
34.14	-70.0026	6.42208	-1.11325
34.16	-70.0026	6.65498	-1.37642
34.18	-70.0026	6.84448	-1.65732
34.2	-70.0026	6.98845	-1.9475
34.22	-70.0026	7.08726	-2.23801
34.24	-70.0026	7.14329	-2.51981
34.26	-70.0026	7.16036	-2.78419
34.28	-70.0026	7.14302	-3.02318
34.3	-70.0026	7.09599	-3.22988
34.32	-70.0026	7.02355	-3.39878
34.34	-70.0026	6.92924	-3.52599
34.36	-70.0026	6.81569	-3.60931
34.38	-70.0026	6.68469	-3.64829
34.4	-70.0026	6.53746	-3.64405
34.42	-70.0026	6.37508	-3.59909
34.44	-70.0026	6.19894	-3.5169
34.46	-70.0026	6.01113	-3.40165
34.48	-70.0026	5.81481	-3.25777
34.5	-70.0026	5.61425	-3.0896
34.52	-70.0026	5.41477	-2.90111
34.54	-70.0026	5.22237	-2.69578
34.56	-70.0026	5.04332	-2.47656
34.58	-70.0026	4.8835	-2.24599
34.6	-70.0026	4.74789	-2.00647
34.62	-70.0026	4.64004	-1.76052
34.64	-70.0026	4.56179	-1.51113
34.66	-70.0026	4.51312	-1.26202
34.68	-70.0026	4.49227	-1.01785
34.7	-70.0026	4.49611	-0.784179
34.72	-70.0026	4.52053	-0.567327
34.74	-70.0026	4.56106	-0.374
34.76	-70.0026	4.61339	-0.210785
34.78	-70.0026	4.67383	-0.0835351
34.8	-70.0026	4.73967	0.0032584
34.82	-70.0026	4.8093	0.0470098
34.84	-70.0026	4.88216	0.0474198
34.86	-70.0026	4.95853	0.00661876
34.88	-70.0026	5.0392	-0.0709645
34.9	-70.0026	5.12497	-0.179008
34.92	-70.0026	5.21628	-0.30993
34.94	-70.0026	5.31281	-0.455661
34.96	-70.0026	5.41322	-0.608445
34.98	-70.0026	5.51505	-0.761551
35	-70.0026	5.61485	-0.909791
35.02	-70.0026	5.70842	-1.04975
35.04	-70.0026	5.79125	-1.17973
35.06	-70.0026	5.85906	-1.29936
35.08	-70.0026	5.90834	-1.40902
35.1	-70.0026	5.93693	-1.50916
35.12	-70.0026	5.94438	-1.59958
35.14	-70.0026	5.93222	-1.67891
35.16	-70.0026	5.90397	-1.7443
35.18	-70.0026	5.86488	-1.79142
35.2	-70.0026	5.82142	-1.81483
35.22	-70.0026	5.78065	-1.80859
35.24	-70.0026	5.74935	-1.76711
35.26	-70.0026	5.73325	-1.68608
35.28	-70.0026	5.73617	-1.56327
35.3	-70.0026	5.75958	-1.39926
35.32	-70.0026	5.80221	-1.19779
35.34	-70.0026	5.86017	-0.965745
35.36	-70.0026	5.92728	-0.712785
35.38	-70.0026	5.99582	-0.450646
35.4	-70.0026	6.05744	-0.192152
35.42	-70.0026	6.10415	0.0498891
35.44	-70.0026	6.12938	0.263791
35.46	-70.0026	6.12878	0.439961
35.48	-70.0026	6.10078	0.571625
35.5	-70.0026	6.04685	0.655246
35.52	-70.0026	5.97131	0.690601
35.54	-70.0026	5.88091	0.680545
35.56	-70.0026	5.78406	0.63052
35.58	-70.0026	5.69001	0.547903
35.6	-70.0026	5.6079	0.441295
35.62	-70.0026	5.54599	0.319843
35.64	-70.0026	5.51098	0.192645
35.66	-70.0026	5.50755	0.0683029
35.68	-70.0026	5.53814	-0.0453875
35.7	-70.0026	5.60286	-0.141623
35.72	-70.0026	5.69957	-0.214693
35.74	-70.0026	5.82407	-0.260039
35.76	-70.0026	5.97031	-0.274305
35.78	-70.0026	6.13066	-0.255392
35.8	-70.0026	6.29621	-0.202521
35.82	-70.0026	6.45719	-0.116283
35.84	-70.0026	6.60335	0.00134414
35.86	-70.0026	6.72456	0.147048
35.88	-70.0026	6.81145	0.316328
35.9	-70.0026	6.85604	0.503731
35.92	-70.0026	6.85245	0.70319
35.94	-70.0026	6.79744	0.908416
35.96	-70.0026	6.69076	1.11332
35.98	-70.0026	6.5353	1.31241
36	-70.0026	6.33688	1.50116
36.02	-70.0026	6.10377	1.6762
36.04	-70.0026	5.846	1.83552
36.06	-70.0026	5.57447	1.97837
36.08	-70.0026	5.3	2.1052
36.1	-70.0026	5.03251	2.21736
36.12	-70.0026	4.78029	2.31681
36.14	-70.0026	4.54951	2.40578
36.16	-70.0026	4.34404	2.48642
36.18	-70.0026	4.16545	2.56049
36.2	-70.0026	4.01327	2.62915
36.22	-70.0026	3.88532	2.69283
36.24	-70.0026	3.77823	2.75119
36.26	-70.0026	3.68792	2.80313
36.28	-70.0026	3.61004	2.84698
36.3	-70.0026	3.54046	2.88059
36.32	-70.0026	3.47561	2.90154
36.34	-70.0026	3.41284	2.90731
36.36	-70.0026	3.35062	2.89542
36.38	-70.0026	3.28876	2.86358
36.4	-70.0026	3.22839	2.80979
36.42	-70.0026	3.17198	2.73239
36.44	-70.0026	3.12304	2.63014
36.46	-70.0026	3.08583	2.50229
36.48	-70.0026	3.06483	2.34859
36.5	-70.0026	3.06424	2.16933
36.52	-70.0026	3.08735	1.96542
36.54	-70.0026	3.13602	1.73837
36.56	-70.0026	3.21025	1.49037
36.58	-70.0026	3.30788	1.22428
36.6	-70.0026	3.42456	0.943643
36.62	-70.0026	3.55384	0.652622
36.64	-70.0026	3.68756	0.355926
36.66	-70.0026	3.81628	0.0586359
36.68	-70.0026	3.93001	-0.234044
36.7	-70.0026	4.01888	-0.517101
36.72	-70.0026	4.07393	-0.786083
36.74	-70.0026	4.08782	-1.03748
36.76	-70.0026	4.05554	-1.26908
36.78	-70.0026	3.97486	-1.48015
36.8	-70.0026	3.84675	-1.67159
36.82	-70.0026	3.67538	-1.8457
36.84	-70.0026	3.46803	-2.00591
36.86	-70.0026	3.23453	-2.15619
36.88	-70.0026	2.98661	-2.30041
36.9	-70.0026	2.73691	-2.44158
36.92	-70.0026	2.49793	-2.58125
36.94	-70.0026	2.28103	-2.71901
36.96	-70.0026	2.09542	-2.85226
36.98	-70.0026	1.94753	-2.97626
37	-70.0026	1.8406	-3.08451
37.02	-70.0026	1.7747	-3.16934
37.04	-70.0026	1.74704	-3.22273
37.06	-70.0026	1.75267	-3.23715
37.08	-70.0026	1.78527	-3.20643
37.1	-70.0026	1.83812	-3.12647
37.12	-70.0026	1.9049	-2.99573
37.14	-70.0026	1.98048	-2.81555
37.16	-70.0026	2.06134	-2.5901
37.18	-70.0026	2.14581	-2.3262
37.2	-70.0026	2.23402	-2.0329
37.22	-70.0026	2.3277	-1.72091
37.24	-70.0026	2.42968	-1.40203
37.26	-70.0026	2.54344	-1.08845
37.28	-70.0026	2.6726	-0.792131
37.3	-70.0026	2.82034	-0.524185
37.32	-70.0026	2.98903	-0.294324
37.34	-70.0026	3.17983	-0.110354
37.36	-70.0026	3.3924	0.0222686
37.38	-70.0026	3.62484	0.100805
37.4	-70.0026	3.8736	0.125495
37.42	-70.0026	4.13367	0.099689
37.44	-70.0026	4.39879	0.0298059
37.46	-70.0026	4.66191	-0.0748897
37.48	-70.0026	4.91568	-0.202726
37.5	-70.0026	5.15301	-0.340265
37.52	-70.0026	5.3677	-0.47312
37.54	-70.0026	5.55493	-0.586876
37.56	-70.0026	5.71163	-0.668049
37.58	-70.0026	5.83672	-0.704986
37.6	-70.0026	5.93109	-0.68863
37.62	-70.0026	5.99735	-0.613073
37.64	-70.0026	6.03945	-0.475841
37.66	-70.0026	6.06214	-0.277905
37.68	-70.0026	6.07041	-0.0234168
37.7	-70.0026	6.06889	0.280769
37.72	-70.0026	6.06144	0.625741
37.74	-70.0026	6.0508	1.00126
37.76	-70.0026	6.03848	1.39648
37.78	-70.0026	6.02474	1.80066
37.8	-70.0026	6.00884	2.2037
37.82	-70.0026	5.98924	2.59654
37.84	-70.0026	5.96401	2.97146
37.86	-70.0026	5.93117	3.32207
37.88	-70.0026	5.889	3.64337
37.9	-70.0026	5.83632	3.93153
37.92	-70.0026	5.77268	4.1837
37.94	-70.0026	5.6984	4.39782
37.96	-70.0026	5.61458	4.5724
37.98	-70.0026	5.52299	4.70633
38	-70.0026	5.42591	4.79884
38.02	-70.0026	5.32592	4.8494
38.04	-70.0026	5.22567	4.85776
38.06	-70.0026	5.12768	4.82391
38.08	-70.0026	5.03417	4.74816
38.1	-70.0026	4.94694	4.63115
38.12	-70.0026	4.8673	4.47388
38.14	-70.0026	4.79614	4.27776
38.16	-70.0026	4.73395	4.04457
38.18	-70.0026	4.68103	3.7766
38.2	-70.0026	4.63764	3.47666
38.22	-70.0026	4.60417	3.1482
38.24	-70.0026	4.58132	2.79542
38.26	-70.0026	4.57018	2.42331
38.28	-70.0026	4.57222	2.0378
38.3	-70.0026	4.58926	1.64566
38.32	-70.0026	4.62322	1.25451
38.34	-70.0026	4.67585	0.872567
38.36	-70.0026	4.74843	0.508408
38.38	-70.0026	4.84138	0.170593
38.4	-70.0026	4.95398	-0.132764
38.42	-70.0026	5.08414	-0.394473
38.44	-70.0026	5.22834	-0.608745
38.46	-70.0026	5.3817	-0.77165
38.48	-70.0026	5.53822	-0.881513
38.5	-70.0026	5.69116	-0.939216
38.52	-70.0026	5.83351	-0.948374
38.54	-70.0026	5.95855	-0.915349
38.56	-70.0026	6.0603	-0.849082
38.58	-70.0026	6.13395	-0.760734
38.6	-70.0026	6.17613	-0.663113
38.62	-70.0026	6.18512	-0.569914
38.64	-70.0026	6.16074	-0.494825
38.66	-70.0026	6.10432	-0.450545
38.68	-70.0026	6.01839	-0.447819
38.7	-70.0026	5.90649	-0.494574
38.72	-70.0026	5.77284	-0.595259
38.74	-70.0026	5.62212	-0.750483
38.76	-70.0026	5.45924	-0.956998
38.78	-70.0026	5.28918	-1.20803
38.8	-70.0026	5.11683	-1.49393
38.82	-70.0026	4.94689	-1.80308
38.84	-70.0026	4.78367	-2.12288
38.86	-70.0026	4.63101	-2.44082
38.88	-70.0026	4.492	-2.74537
38.9	-70.0026	4.36885	-3.02664
38.92	-70.0026	4.26268	-3.27682
38.94	-70.0026	4.17339	-3.4903
38.96	-70.0026	4.09955	-3.66354
38.98	-70.0026	4.0385	-3.79479
39	-70.0026	3.98645	-3.88378
39.02	-70.0026	3.93877	-3.93136
39.04	-70.0026	3.89033	-3.93931
39.06	-70.0026	3.83602	-3.91032
39.08	-70.0026	3.77121	-3.84803
39.1	-70.0026	3.69226	-3.75722
39.12	-70.0026	3.59702	-3.64401
39.14	-70.0026	3.48514	-3.51599
39.16	-70.0026	3.35834	-3.38211
39.18	-70.0026	3.22045	-3.25244
39.2	-70.0026	3.07727	-3.13759
39.22	-70.0026	2.93624	-3.04798
39.24	-70.0026	2.80588	-2.99291
39.26	-70.0026	2.6951	-2.97963
39.28	-70.0026	2.61242	-3.01254
39.3	-70.0026	2.56516	-3.09251
39.32	-70.0026	2.5587	-3.21664
39.34	-70.0026	2.59592	-3.3783
39.36	-70.0026	2.67688	-3.56764
39.38	-70.0026	2.79879	-3.77233
39.4	-70.0026	2.95629	-3.97866
39.42	-70.0026	3.14207	-4.17269
39.44	-70.0026	3.34766	-4.34142
39.46	-70.0026	3.56434	-4.47384
39.48	-70.0026	3.78407	-4.56169
39.5	-70.0026	4.00029	-4.60003
39.52	-70.0026	4.2084	-4.58732
39.54	-70.0026	4.40603	-4.52537
39.56	-70.0026	4.59283	-4.41881
39.58	-70.0026	4.77008	-4.27455
39.6	-70.0026	4.93995	-4.10099
39.62	-70.0026	5.10468	-3.90724
39.64	-70.0026	5.26574	-3.70232
39.66	-70.0026	5.42318	-3.49458
39.68	-70.0026	5.57522	-3.29102
39.7	-70.0026	5.71814	-3.09703
39.72	-70.0026	5.8466	-2.91604
39.74	-70.0026	5.95428	-2.74951
39.76	-70.0026	6.03475	-2.597
39.78	-70.0026	6.08256	-2.45638
39.8	-70.0026	6.09423	-2.3242
39.82	-70.0026	6.06921	-2.19615
39.84	-70.0026	6.0104	-2.06753
39.86	-70.0026	5.92438	-1.93383
39.88	-70.0026	5.82118	-1.79118
39.9	-70.0026	5.71347	-1.63679
39.92	-70.0026	5.61552	-1.4692
[truncated: 276,204+ more rows]

## Sheet: Fig 1B
Fig 1B
	Ratio of current at -50 mV after CBD relative to that before CBD
	Cell	M50_0CBD_6min			Cell	M50_100CBD_6min			M50_300CBD_6min			Averages
	21602028	1.14694			21412016	1.57175		21416005	2.7857			CBD	M50_Mean	M50_SEM
	21610050	0.62163			21412023	2.04258		21416021	4.57034			0	1.14	0.13
	21610039	1.02582			21413007	0.974512		21416028	1.60912			100 nM	2.79	0.35
	21607015	1.1462			21413016	1.33477		21419004	2.90615			300 nM	4.63	0.54
	21607035	1.29166			21413023	1.35865		21419012	4.32669
	21609013	0.90376			21615025	3.90081		21419019	2.93102
	21609024	2.05878			21615037	0.933329		21419025	3.80051
	21609032	1.71099			21615048	2.45318		21421004	7.8963
	21610006	0.811214			2167007	1.1424		21421011	7.48121
	21610017	0.618534			21617020	4.05477		21701006	4.58885
	21610028	1.17019			21617031	1.51517		21701017	7.58339
					21617045	1.38689		21804007	5.76087
	Mean	1.13688			21617056	3.37422		21804025	2.9
	Median	1.1462			21802003	4.43478		21805002	5.7381
	SD	0.437225			21802020	3.51149
	SEM	0.131828			21802040	4.30097
	n	11			21803002	6.91111		Mean	4.63416
					21803020	4.20225		Median	4.44852
					21803040	3.4726		SD	2.00366
					21803060	2.89202		SEM	0.535502
								n	14
					Mean	2.78841
					Median	2.6726
					SD	1.58135
					SEM	0.3536
					n	20

## Sheet: Fig 1C
Fig 1C.	Tail current at -50 vs test voltage (normalized to largest current)
	Control				300 nM CBD			Fit to control data points			Fit to 300 nM CBD data points
	IV_21804025C_1_Norm				IV_21804037C_1_Norm			fit_n4_IV_21804025C_1Norm			fit_n4_IV_21804037C_1Norm
		-100	0.00540286		-100	-0.00857649		-80	0.000202398		-80	0.0048558
		-90	0.00461456		-90	-0.00556916		-79.5	0.00023222		-79.5	0.00549668
		-80	0.00430041		-80	0.00383242		-79	0.000266259		-79	0.00621329
		-70	0.00319104		-70	0.0384223		-78.5	0.000305081		-78.5	0.00701313
		-60	0.0168249		-60	0.185137		-78	0.00034932		-78	0.00790422
		-50	0.115162		-50	0.457688		-77.5	0.000399685		-77.5	0.00889514
		-40	0.334265		-40	0.693111		-77	0.000456974		-77	0.00999497
		-30	0.583182		-30	0.845532		-76.5	0.000522077		-76.5	0.0112133
		-20	0.771648		-20	0.907012		-76	0.000595988		-76	0.0125604
		-10	0.897445		-10	0.969269		-75.5	0.000679817		-75.5	0.0140467
		0	0.958702		0	0.98516		-75	0.000774797		-75	0.0156834
		10	0.988927		10	0.989973		-74.5	0.000882299		-74.5	0.017482
		20	1		20	0.985458		-74	0.00100384		-74	0.0194546
		30	0.988919		30	0.997059		-73.5	0.00114111		-73.5	0.0216133
		40	0.986465		40	1		-73	0.00129597		-73	0.0239707
								-72.5	0.00147046		-72.5	0.0265397
								-72	0.00166684		-72	0.0293332
								-71.5	0.00188759		-71.5	0.0323643
								-71	0.00213543		-71	0.0356459
								-70.5	0.00241333		-70.5	0.0391909
								-70	0.00272452		-70	0.0430121
								-69.5	0.00307253		-69.5	0.0471218
								-69	0.0034612		-69	0.051532
								-68.5	0.00389467		-68.5	0.0562539
								-68	0.00437741		-68	0.0612984
								-67.5	0.00491427		-67.5	0.0666754
								-67	0.00551041		-67	0.0723939
								-66.5	0.00617141		-66.5	0.0784621
								-66	0.0069032		-66	0.0848868
								-65.5	0.00771211		-65.5	0.091674
								-65	0.00860484		-65	0.098828
								-64.5	0.00958852		-64.5	0.106352
								-64	0.0106707		-64	0.114248
								-63.5	0.0118591		-63.5	0.122516
								-63	0.0131622		-63	0.131154
								-62.5	0.0145884		-62.5	0.14016
								-62	0.0161469		-62	0.14953
								-61.5	0.0178469		-61.5	0.159257
								-61	0.0196979		-61	0.169335
								-60.5	0.0217099		-60.5	0.179753
								-60	0.0238928		-60	0.190501
								-59.5	0.026257		-59.5	0.201568
								-59	0.0288127		-59	0.212941
								-58.5	0.0315705		-58.5	0.224604
								-58	0.0345408		-58	0.236542
								-57.5	0.037734		-57.5	0.248738
								-57	0.0411603		-57	0.261174
								-56.5	0.04483		-56.5	0.273833
								-56	0.0487528		-56	0.286694
								-55.5	0.0529382		-55.5	0.299738
								-55	0.0573953		-55	0.312945
								-54.5	0.0621328		-54.5	0.326292
								-54	0.0671586		-54	0.339761
								-53.5	0.0724801		-53.5	0.353329
								-53	0.078104		-53	0.366976
								-52.5	0.0840362		-52.5	0.38068
								-52	0.0902816		-52	0.394421
								-51.5	0.0968444		-51.5	0.408179
								-51	0.103728		-51	0.421933
								-50.5	0.110933		-50.5	0.435665
								-50	0.118463		-50	0.449355
								-49.5	0.126315		-49.5	0.462985
								-49	0.13449		-49	0.476539
								-48.5	0.142985		-48.5	0.489998
								-48	0.151796		-48	0.503348
								-47.5	0.160918		-47.5	0.516573
								-47	0.170347		-47	0.52966
								-46.5	0.180074		-46.5	0.542595
								-46	0.190092		-46	0.555365
								-45.5	0.200391		-45.5	0.567961
								-45	0.210962		-45	0.58037
								-44.5	0.221793		-44.5	0.592585
								-44	0.232872		-44	0.604595
								-43.5	0.244187		-43.5	0.616394
								-43	0.255723		-43	0.627975
								-42.5	0.267467		-42.5	0.639332
								-42	0.279404		-42	0.650459
								-41.5	0.291517		-41.5	0.661353
								-41	0.303792		-41	0.672009
								-40.5	0.316211		-40.5	0.682426
								-40	0.328758		-40	0.6926
								-39.5	0.341417		-39.5	0.702531
								-39	0.354171		-39	0.712217
								-38.5	0.367002		-38.5	0.721659
								-38	0.379894		-38	0.730856
								-37.5	0.39283		-37.5	0.739809
								-37	0.405793		-37	0.74852
								-36.5	0.418768		-36.5	0.756989
								-36	0.431738		-36	0.765221
								-35.5	0.444688		-35.5	0.773216
								-35	0.457603		-35	0.780977
								-34.5	0.470467		-34.5	0.788508
								-34	0.483268		-34	0.795812
								-33.5	0.495992		-33.5	0.802892
								-33	0.508625		-33	0.809753
								-32.5	0.521155		-32.5	0.816397
								-32	0.533571		-32	0.82283
								-31.5	0.545862		-31.5	0.829056
								-31	0.558017		-31	0.835079
								-30.5	0.570026		-30.5	0.840903
								-30	0.581882		-30	0.846533
								-29.5	0.593576		-29.5	0.851974
								-29	0.605099		-29	0.85723
								-28.5	0.616446		-28.5	0.862307
								-28	0.627609		-28	0.867208
								-27.5	0.638584		-27.5	0.871938
								-27	0.649366		-27	0.876502
								-26.5	0.659949		-26.5	0.880905
								-26	0.670331		-26	0.885151
								-25.5	0.680509		-25.5	0.889245
								-25	0.690479		-25	0.893191
								-24.5	0.700239		-24.5	0.896995
								-24	0.709789		-24	0.900659
								-23.5	0.719126		-23.5	0.904189
								-23	0.728251		-23	0.907588
								-22.5	0.737163		-22.5	0.910862
								-22	0.745862		-22	0.914014
								-21.5	0.754349		-21.5	0.917047
								-21	0.762625		-21	0.919967
								-20.5	0.770691		-20.5	0.922776
								-20	0.778549		-20	0.925479
								-19.5	0.7862		-19.5	0.928079
								-19	0.793647		-19	0.93058
								-18.5	0.800891		-18.5	0.932984
								-18	0.807936		-18	0.935297
								-17.5	0.814784		-17.5	0.93752
								-17	0.821438		-17	0.939657
								-16.5	0.827901		-16.5	0.941711
								-16	0.834177		-16	0.943685
								-15.5	0.840268		-15.5	0.945582
								-15	0.846178		-15	0.947405
								-14.5	0.85191		-14.5	0.949156
								-14	0.857469		-14	0.950838
								-13.5	0.862858		-13.5	0.952454
								-13	0.868079		-13	0.954006
								-12.5	0.873138		-12.5	0.955497
								-12	0.878038		-12	0.956929
								-11.5	0.882783		-11.5	0.958304
								-11	0.887376		-11	0.959624
								-10.5	0.891821		-10.5	0.960891
								-10	0.896122		-10	0.962108
								-9.5	0.900282		-9.5	0.963276
								-9	0.904306		-9	0.964397
								-8.5	0.908197		-8.5	0.965473
								-8	0.911958		-8	0.966506
								-7.5	0.915593		-7.5	0.967498
								-7	0.919107		-7	0.968449
								-6.5	0.922501		-6.5	0.969362
								-6	0.92578		-6	0.970239
								-5.5	0.928948		-5.5	0.97108
								-5	0.932006		-5	0.971886
								-4.5	0.934959		-4.5	0.97266
								-4	0.93781		-4	0.973403
								-3.5	0.940562		-3.5	0.974116
								-3	0.943218		-3	0.974799
								-2.5	0.945781		-2.5	0.975455
								-2	0.948255		-2	0.976084
								-1.5	0.95064		-1.5	0.976687
								-1	0.952942		-1	0.977266
								-0.5	0.955162		-0.5	0.977821
								0	0.957302		0	0.978354
								0.5	0.959367		0.5	0.978865
								1	0.961357		1	0.979355
								1.5	0.963276		1.5	0.979824
								2	0.965126		2	0.980275
								2.5	0.96691		2.5	0.980707
								3	0.968628		3	0.981122
								3.5	0.970285		3.5	0.981519
								4	0.971881		4	0.9819
								4.5	0.97342		4.5	0.982266
								5	0.974902		5	0.982616
								5.5	0.97633		5.5	0.982953
								6	0.977706		6	0.983275
								6.5	0.979031		6.5	0.983584
								7	0.980307		7	0.98388
								7.5	0.981537		7.5	0.984164
								8	0.982721		8	0.984437
								8.5	0.983862		8.5	0.984698
								9	0.98496		9	0.984949
								9.5	0.986018		9.5	0.985189
								10	0.987037		10	0.985419
								10.5	0.988017		10.5	0.98564
								11	0.988962		11	0.985851
								11.5	0.989871		11.5	0.986054
								12	0.990746		12	0.986249
								12.5	0.991589		12.5	0.986435
								13	0.9924		13	0.986614
								13.5	0.993181		13.5	0.986786
								14	0.993932		14	0.98695
								14.5	0.994656		14.5	0.987108
								15	0.995352		15	0.987259
								15.5	0.996023		15.5	0.987404
								16	0.996668		16	0.987542
								16.5	0.997289		16.5	0.987675
								17	0.997886		17	0.987803
								17.5	0.998461		17.5	0.987925
								18	0.999014		18	0.988043
								18.5	0.999547		18.5	0.988155
								19	1.00006		19	0.988263
								19.5	1.00055		19.5	0.988366
											0	0.988116
											0.5	0.988258
											1	0.988393
											1.5	0.988522
											2	0.988643
											2.5	0.988759
											3	0.988868
											3.5	0.988972
											4	0.989071
											4.5	0.989165
											5	0.989254
											5.5	0.989338
											6	0.989418
											6.5	0.989494
											7	0.989566
											7.5	0.989634
											8	0.989699
											8.5	0.98976
											9	0.989819
											9.5	0.989874
											10	0.989926
											10.5	0.989976
											11	0.990024
											11.5	0.990068
											12	0.990111
											12.5	0.990151
											13	0.99019
											13.5	0.990226
											14	0.99026
											14.5	0.990293
											15	0.990324
											15.5	0.990354
											16	0.990382
											16.5	0.990408
											17	0.990433
											17.5	0.990457
											18	0.99048
											18.5	0.990501
											19	0.990522
											19.5	0.990541

## Sheet: Fig 1D
	Data points				Fitted curve			Cells going into collected data
	[CBD] (uM)	Mean shift (mV)	SEM		Conc (uM)	Shift (mV)		No CBD (10 minute control)					30 nM CBD					100 nM CBD					300 nM CBD					500 nM CBD					1 uM CBD					3 uM CBD					10 uM CBD					20 uM CBD
	0	-3.2	0.54		1e-08	-2.48531		FileName	Vh control	Vh 0 CBD (10 min)			FileName					FileName					FileName					FileName					FileName					FileName					FileName					FileName
	0.03	-2.64	0.98		1.10975e-08	-2.48531		21602024	-36.881	-40.3003	-3.4193		21527002	-33.5962	-36.0986	-2.5024		21412007	-34.3289	-45.3211	-10.9922		21416018	-34.8	-46.9	-12.1		21423002	-40	-51.3	-11.3		21430015	-40	-50.5	-10.5		21329004	-29.1	-43.2	-14.1		21304008	-32.2	-58.7	-26.5		21405002	-36
	0.1	-7.38	0.84		1.23155e-08	-2.48531		21602035	-34.8657	-40.3332	-5.4675		21527017	-34.3941	-37.9541	-3.56		21412014	-36.6595	-40.6051	-3.9456		21416026	-41.6	-54.1	-12.5		21423018	-38	-43.2	-5.2		21430026	-41.1	-55.5	-14.4		21329010	-34.8	-47.6	-12.8		21304015	-26.7	-52.8	-26.1		21405013	-29.6
	0.3	-13.9	0.85		1.36672e-08	-2.48531		21607011	-35.6717	-41.0158	-5.3441		21527027	-31.5378	-34.2365	-2.6987		21412021	-38.1069	-43.8846	-5.7777		21419002	-36.7	-46.9	-10.2		21423027	-36	-51.2	-15.2		21430042	-38.6	-60.5	-21.9		21330002	-31.9	-44.3	-12.4		21304022	-25.9	-52.5	-26.6		21405021	-35.4
	0.5	-15.4	1.3		1.51672e-08	-2.48531		21607031	-44.5826	-47.8267	-3.2441		21528003	-38.102	-37.7235	0.3785		21413005	-28.9733	-34.3747	-5.4014		21419010	-34.7	-44.8	-10.1		21423039	-35.9	-52.6	-16.7		21503005	-34.4	-51	-16.6		21330007	-34.7	-48.1	-13.4		21304029	-29.2	-55.2	-26		21406010	-38
	1	-17.5	2		1.68318e-08	-2.48531		21609009	-33.4729	-32.4711	1.0018		21528019	-37.7684	-36.7919	0.9765		21413014	-35.5974	-36.8159	-1.2185		21419023	-37.5	-49.2	-11.7		21428002	-35.8	-48.8	-13		21503016	-27.4	-52.8	-25.4		21330012	-25.9	-45.9	-20		21304036	-29.4	-52.7	-23.3		21406015	-33.6
	3	-19.4	1.1		1.86791e-08	-2.48531		21609028	-35.9584	-39.3413	-3.3829		21531013	-28.8149	-30.0521	-1.2372		21413021	-31.6483	-38.6608	-7.0125		21421002	-32.6	-42.7	-10.1		21428013	-35	-52.1	-17.1		21503026	-41.5	-62.1	-20.6		21330017	-28.2	-43.6	-15.4		21305002	-31.9	-58.1	-26.2		21406021	-38.4
	10	-20.6	1.4		2.07292e-08	-2.48531		21610002	-37.8631	-41.9675	-4.1044		21601002	-30.934	-32.1875	-1.2535		21413028	-35.6173	-41.6487	-6.0314		21421009	-33.9	-43.5	-9.6		21428024	-35.8	-52.5	-16.7		21503045	-40.4	-53.5	-13.1		21331024	-30.8	-54.6	-23.8		21305007	-32.6	-58.9	-26.3		21408005	-36.4
	20	-18.9	1.6		2.30043e-08	-2.48531		21610013	-27.7433	-29.9074	-2.1641		21602002	-36.4339	-41.6393	-5.2054		21615009	-35.7459	-37.0241	-1.2782		21701002	-32.9	-53.1	-20.2		21429002	-34.9	-55.7	-20.8							21401002	-36.2	-61.4	-25.2		21305015	-34	-55.4	-21.4		21408010	-36.1
					2.55291e-08	-2.48531		21610024	-25.3701	-29.5386	-4.1685		21602013	-32.2711	-40.925	-8.6539		21615036	-35.0035	-37.6313	-2.6278		21701013	-28.7	-41.2	-12.5		21429013	-41.2	-58.6	-17.4				Mean	-17.5		21401007	-35.6	-58	-22.4		21305020	-34.2	-55.5	-21.3		21408016	-39
					2.8331e-08	-2.48531		21610035	-32.6518	-34.5352	-1.8834							21617003	-32.5932	-35.4239	-2.8307		21701030	-29.7	-46.7	-17		21429025	-46.1	-68.1	-22				Median	-16.6		21401012	-32.6	-52.6	-20		21305029	-31.6	-56.4	-24.8		21408021	-30.9
					3.14404e-08	-2.48531		21610046	-37.0655	-40.1385	-3.073				Mean	-2.63957		21617016	-29.3993	-34.6364	-5.2371		21708005	-30.2	-45.9	-15.7		21429037	-36.1	-51.8	-15.7				SD	5.32541		21401017	-29.4	-51.8	-22.4		21505002	-44.2	-58.4	-14.2
					3.4891e-08	-2.48531									Median	-2.5024		21617027	-34.8297	-41.3485	-6.5188		21708016	-33.2	-48.4	-15.2		21429048	-41.2	-55.2	-14				SEM	2.01282		21401029	-38.3	-59.6	-21.3		21505013	-37.5	-50.9	-13.4
					3.87204e-08	-2.48531				Mean	-3.2045				SD	2.95165		21617041	-29.5833	-36.9248	-7.3415		21709002	-31.3	-49.8	-18.5									n	7		21513007	-35.3	-52.9	-17.6		21505024	-32.7	-59.2	-26.5
					4.297e-08	-2.48531				Median	-3.3829				SEM	0.983882		21617052	-29.7106	-42.7771	-13.0665		21709014	-34.6	-53.1	-18.5				Mean	-15.425							21513018	-32.5	-57.5	-25		21505036	-41.9	-58.2	-16.3
					4.76861e-08	-2.48531				SD	1.79041				n	9		21802003	-32.2	-42.5	-10.3		21804007	-33.7	-43.6	-9.9				Median	-16.2							21513029	-36.6	-57.2	-20.6		21506003	-32.5	-51.4	-18.9
					5.29198e-08	-2.48531				SEM	0.539829							21802020	-33	-45.3	-12.3		21804025	-33.2	-48.7	-15.5				SD	4.38678							21513041	-33.6	-57.5	-23.9		21506017	-40.9	-54.4	-13.5
					5.87279e-08	-2.48531				n	11							21802040	-36.9	-47.8	-10.9		21805002	-32.2	-49.2	-17				SEM	1.26636									Mean	-19.3938		21506026	-33.8	-52.2	-18.4
					6.51734e-08	-2.48531												21803002	-35.1	-44	-8.9									n	12									Median	-20.3		21507002	-43.1	-57.9	-14.8
					7.23263e-08	-2.48531												21803020	-32.2	-45.3	-13.1				Mean	-13.9														SD	4.50385		21510003	-34.5	-40.8	-6.3
					8.02643e-08	-2.48531												21802040	-33.7	-45.9	-12.2				Median	-12.5														SEM	1.12596				Mean	-20.5684
					8.90735e-08	-2.48531												21803060	-35.1	-43.1	-8				SD	3.51586														n	16				Median	-21.4
					9.88496e-08	-2.48531																			SEM	0.852721																			SD	6.06667
					1.09699e-07	-2.48531														Mean	-7.38				n	17																			SEM	1.39179
					1.21738e-07	-2.48531														Median	-7.0125																								n	19
					1.35099e-07	-2.48531														SD	3.8288
					1.49927e-07	-2.48531														SEM	0.835514
					1.66382e-07	-2.48531														n	21
					1.84642e-07	-2.48531
					2.04907e-07	-2.48531
					2.27397e-07	-2.48531
					2.52354e-07	-2.48531
					2.8005e-07	-2.48531
					3.10787e-07	-2.48531
					3.44896e-07	-2.48532
					3.82749e-07	-2.48532
					4.24757e-07	-2.48532
					4.71375e-07	-2.48532
					5.2311e-07	-2.48532
					5.80523e-07	-2.48532
					6.44236e-07	-2.48532
					7.14943e-07	-2.48532
					7.9341e-07	-2.48532
					8.80488e-07	-2.48532
					9.77124e-07	-2.48532
					1.08437e-06	-2.48532
					1.20338e-06	-2.48532
					1.33545e-06	-2.48532
					1.48202e-06	-2.48532
					1.64468e-06	-2.48532
					1.82518e-06	-2.48532
					2.0255e-06	-2.48532
					2.24781e-06	-2.48532
					2.49451e-06	-2.48532
					2.76829e-06	-2.48532
					3.07211e-06	-2.48532
					3.40929e-06	-2.48532
					3.78346e-06	-2.48532
					4.19871e-06	-2.48532
					4.65953e-06	-2.48533
					5.17092e-06	-2.48533
					5.73844e-06	-2.48533
					6.36825e-06	-2.48533
					7.06718e-06	-2.48533
					7.84282e-06	-2.48534
					8.70359e-06	-2.48534
					9.65883e-06	-2.48534
					1.07189e-05	-2.48535
					1.18953e-05	-2.48535
					1.32009e-05	-2.48536
					1.46497e-05	-2.48536
					1.62576e-05	-2.48537
					1.80419e-05	-2.48538
					2.0022e-05	-2.48539
					2.22195e-05	-2.4854
					2.46581e-05	-2.48541
					2.73644e-05	-2.48543
					3.03677e-05	-2.48545
					3.37006e-05	-2.48546
					3.73994e-05	-2.48549
					4.1504e-05	-2.48551
					4.60592e-05	-2.48554
					5.11143e-05	-2.48558
					5.67243e-05	-2.48561
					6.29499e-05	-2.48566
					6.98588e-05	-2.48571
					7.7526e-05	-2.48577
					8.60346e-05	-2.48584
					9.54772e-05	-2.48592
					0.000105956	-2.486
					0.000117585	-2.48611
					0.00013049	-2.48623
					0.000144812	-2.48636
					0.000160705	-2.48652
					0.000178343	-2.4867
					0.000197917	-2.4869
					0.000219639	-2.48714
					0.000243744	-2.48741
					0.000270496	-2.48772
					0.000300184	-2.48808
					0.000333129	-2.48849
					0.000369691	-2.48896
					0.000410266	-2.48951
					0.000455294	-2.49013
					0.000505263	-2.49085
					0.000560717	-2.49167
					0.000622257	-2.49262
					0.000690551	-2.49371
					0.000766341	-2.49496
					0.000850449	-2.49639
					0.000943788	-2.49804
					0.00104737	-2.49993
					0.00116232	-2.50211
					0.00128989	-2.50461
					0.00143146	-2.50747
					0.00158857	-2.51077
					0.00176291	-2.51455
					0.0019564	-2.5189
					0.00217112	-2.52389
					0.0024094	-2.52962
					0.00267384	-2.5362
					0.0029673	-2.54375
					0.00329297	-2.55242
					0.00365438	-2.56237
					0.00405546	-2.57379
					0.00450056	-2.58689
					0.00499451	-2.60191
					0.00554266	-2.61914
					0.00615099	-2.6389
					0.00682607	-2.66154
					0.00757525	-2.68748
					0.00840665	-2.71719
					0.0093293	-2.7512
					0.0103532	-2.79011
					0.0114895	-2.83459
					0.0127505	-2.88542
					0.0141499	-2.94346
					0.0157029	-3.00965
					0.0174263	-3.08507
					0.0193389	-3.1709
					0.0214614	-3.26845
					0.0238169	-3.37915
					0.0264308	-3.50455
					0.0293317	-3.64632
					0.0325509	-3.80624
					0.0361234	-3.98617
					0.0400881	-4.18806
					0.0444878	-4.41384
					0.0493705	-4.66546
					0.054789	-4.94476
					0.0608022	-5.25342
					0.0674754	-5.59287
					0.074881	-5.96419
					0.0830994	-6.36799
					0.0922198	-6.80433
					0.102341	-7.27259
					0.113573	-7.77143
					0.126038	-8.29867
					0.139871	-8.85133
					0.155223	-9.4256
					0.172259	-10.017
					0.191164	-10.6203
					0.212145	-11.2299
					0.235429	-11.8402
					0.261268	-12.4451
					0.289942	-13.0392
					0.321764	-13.617
					0.357079	-14.1741
					0.396269	-14.7064
					0.43976	-15.2108
					0.488025	-15.685
					0.541587	-16.1274
					0.601028	-16.5374
					0.666992	-16.9148
					0.740196	-17.2603
					0.821434	-17.5746
					0.911589	-17.8594
					1.01164	-18.1161
					1.12267	-18.3466
					1.24588	-18.5529
					1.38262	-18.7368
					1.53437	-18.9004
					1.70277	-19.0454
					1.88965	-19.1738
					2.09705	-19.2872
					2.3272	-19.3871
					2.58262	-19.475
					2.86607	-19.5523
					3.18063	-19.6202
					3.52971	-19.6797
					3.9171	-19.7318
					4.34701	-19.7774
					4.82411	-19.8174
					5.35357	-19.8522
					5.94113	-19.8827
					6.59319	-19.9093
					7.31681	-19.9326
					8.11984	-19.9528
					9.01102	-19.9705
					10	-19.9859
[truncated: 2 more columns]
