# Supplementary material for: Cannabidiol activates neuronal Kv7 channels
Source: eLife. 2022 Feb 18;11:e73246. doi: 10.7554/eLife.73246 (PMC8856652; doi:10.7554/eLife.73246)
Supplement: Figure 2—source data 1. [file elife-73246-fig2-data1.xlsx]

## Sheet: Fig 2A
		Con Test -60	CBD -60	Con -70	CBD -70	Con -80	CBD -80
		21n30114F008	21n30118F008	21n30114F010	21n30118F010	21n30114F012	21n30118F012
	Time (ms)	Current (pA)	Current (pA)	Current (pA)	Current (pA)	Current (pA)	Current (pA)
	0	101.084	200.218	115.34	205.078	103.158	221.042
	0.02	101.104	200.24	115.332	205.076	103.183	221.005
	0.04	101.16	200.304	115.306	205.069	103.252	220.894
	0.06	101.254	200.407	115.259	205.06	103.357	220.711
	0.08	101.381	200.546	115.186	205.051	103.483	220.455
	0.1	101.54	200.717	115.081	205.046	103.611	220.13
	0.12	101.727	200.915	114.937	205.051	103.721	219.74
	0.14	101.937	201.138	114.749	205.068	103.794	219.292
	0.16	102.166	201.384	114.511	205.1	103.814	218.799
	0.18	102.408	201.653	114.22	205.151	103.771	218.274
	0.2	102.658	201.947	113.874	205.221	103.662	217.735
	0.22	102.909	202.269	113.477	205.31	103.49	217.201
	0.24	103.156	202.623	113.03	205.416	103.265	216.691
	0.26	103.391	203.009	112.541	205.535	103.004	216.226
	0.28	103.609	203.428	112.018	205.665	102.728	215.82
	0.3	103.807	203.877	111.469	205.803	102.459	215.484
	0.32	103.979	204.351	110.906	205.945	102.218	215.223
	0.34	104.125	204.839	110.34	206.091	102.025	215.035
	0.36	104.243	205.328	109.782	206.242	101.894	214.91
	0.38	104.336	205.804	109.242	206.397	101.831	214.832
	0.4	104.405	206.25	108.73	206.561	101.838	214.777
	0.42	104.453	206.651	108.254	206.736	101.907	214.72
	0.44	104.484	206.99	107.821	206.926	102.027	214.632
	0.46	104.501	207.257	107.435	207.135	102.182	214.484
	0.48	104.507	207.443	107.101	207.364	102.353	214.252
	0.5	104.504	207.544	106.821	207.617	102.523	213.914
	0.52	104.49	207.56	106.597	207.894	102.674	213.457
	0.54	104.466	207.495	106.431	208.194	102.792	212.875
	0.56	104.429	207.356	106.324	208.52	102.868	212.172
	0.58	104.379	207.155	106.276	208.87	102.895	211.362
	0.6	104.312	206.905	106.287	209.244	102.871	210.467
	0.62	104.228	206.62	106.358	209.642	102.798	209.518
	0.64	104.126	206.317	106.485	210.062	102.678	208.555
	0.66	104.007	206.011	106.665	210.503	102.519	207.618
	0.68	103.872	205.719	106.892	210.959	102.324	206.755
	0.7	103.723	205.454	107.158	211.423	102.101	206.007
	0.72	103.562	205.229	107.451	211.883	101.854	205.416
	0.74	103.391	205.055	107.758	212.323	101.588	205.014
	0.76	103.211	204.939	108.064	212.727	101.308	204.825
	0.78	103.023	204.882	108.352	213.072	101.017	204.86
	0.8	102.825	204.882	108.61	213.339	100.721	205.117
	0.82	102.618	204.935	108.823	213.507	100.426	205.584
	0.84	102.4	205.028	108.983	213.56	100.139	206.233
	0.86	102.173	205.147	109.086	213.488	99.872	207.028
	0.88	101.936	205.278	109.133	213.288	99.6361	207.925
	0.9	101.694	205.402	109.129	212.967	99.446	208.875
	0.92	101.45	205.504	109.087	212.541	99.3168	209.83
	0.94	101.212	205.57	109.02	212.035	99.2634	210.743
	0.96	100.989	205.588	108.946	211.483	99.2984	211.574
	0.98	100.792	205.552	108.882	210.922	99.4309	212.29
	1	100.631	205.459	108.847	210.392	99.6647	212.866
	1.02	100.517	205.313	108.852	209.932	99.9972	213.288
	1.04	100.458	205.118	108.906	209.578	100.418	213.55
	1.06	100.461	204.884	109.012	209.357	100.912	213.655
	1.08	100.527	204.623	109.165	209.287	101.453	213.614
	1.1	100.653	204.347	109.356	209.377	102.015	213.443
	1.12	100.831	204.068	109.569	209.622	102.567	213.161
	1.14	101.047	203.798	109.784	210.007	103.078	212.792
	1.16	101.285	203.546	109.979	210.509	103.519	212.36
	1.18	101.525	203.32	110.134	211.095	103.866	211.891
	1.2	101.746	203.125	110.228	211.729	104.102	211.409
	1.22	101.929	202.964	110.248	212.37	104.219	210.938
	1.24	102.057	202.837	110.187	212.98	104.214	210.498
	1.26	102.118	202.741	110.043	213.522	104.096	210.108
	1.28	102.107	202.671	109.824	213.964	103.879	209.781
	1.3	102.023	202.623	109.543	214.282	103.582	209.527
	1.32	101.873	202.588	109.222	214.459	103.23	209.348
	1.34	101.668	202.56	108.883	214.485	102.845	209.241
	1.36	101.425	202.528	108.55	214.361	102.454	209.199
	1.38	101.16	202.485	108.247	214.094	102.076	209.206
	1.4	100.891	202.424	107.995	213.698	101.73	209.246
	1.42	100.635	202.336	107.808	213.19	101.429	209.298
	1.44	100.405	202.217	107.693	212.592	101.183	209.339
	1.46	100.21	202.061	107.652	211.927	100.994	209.351
	1.48	100.057	201.867	107.678	211.215	100.862	209.314
	1.5	99.9474	201.634	107.757	210.475	100.784	209.215
	1.52	99.8794	201.367	107.872	209.723	100.752	209.048
	1.54	99.8485	201.068	108.001	208.969	100.756	208.81
	1.56	99.8485	200.746	108.12	208.221	100.787	208.507
	1.58	99.8726	200.41	108.207	207.483	100.833	208.15
	1.6	99.9139	200.067	108.239	206.756	100.881	207.755
	1.62	99.9666	199.729	108.202	206.041	100.922	207.341
	1.64	100.026	199.401	108.082	205.337	100.945	206.931
	1.66	100.091	199.089	107.874	204.646	100.942	206.546
	1.68	100.159	198.797	107.578	203.971	100.905	206.206
	1.7	100.233	198.522	107.201	203.317	100.832	205.928
	1.72	100.315	198.26	106.757	202.693	100.72	205.724
	1.74	100.409	198.002	106.264	202.106	100.571	205.601
	1.76	100.519	197.738	105.747	201.568	100.39	205.56
	1.78	100.649	197.457	105.232	201.087	100.184	205.597
	1.8	100.803	197.149	104.749	200.671	99.9623	205.7
	1.82	100.982	196.804	104.328	200.328	99.7373	205.852
	1.84	101.187	196.419	103.997	200.06	99.5208	206.034
	1.86	101.416	195.994	103.782	199.868	99.3254	206.221
	1.88	101.668	195.537	103.705	199.749	99.1625	206.389
	1.9	101.94	195.061	103.78	199.697	99.0416	206.51
	1.92	102.225	194.583	104.016	199.706	98.9695	206.563
	1.94	102.52	194.126	104.41	199.767	98.9498	206.527
	1.96	102.818	193.714	104.954	199.872	98.982	206.389
	1.98	103.112	193.374	105.626	200.015	99.0618	206.139
	2	103.395	193.127	106.4	200.191	99.1809	205.779
	2.02	103.657	192.993	107.241	200.397	99.3273	205.316
	2.04	103.889	192.984	108.11	200.635	99.4863	204.767
	2.06	104.08	193.107	108.967	200.907	99.6411	204.155
	2.08	104.218	193.358	109.772	201.217	99.7738	203.512
	2.1	104.293	193.73	110.491	201.569	99.8671	202.874
	2.12	104.295	194.207	111.095	201.968	99.9049	202.278
	2.14	104.217	194.766	111.567	202.414	99.8744	201.764
	2.16	104.055	195.385	111.899	202.904	99.7668	201.368
	2.18	103.808	196.036	112.095	203.432	99.5784	201.12
	2.2	103.484	196.691	112.166	203.985	99.3116	201.041
	2.22	103.092	197.326	112.137	204.548	98.9745	201.142
	2.24	102.648	197.917	112.034	205.101	98.5816	201.422
	2.26	102.171	198.443	111.889	205.623	98.1522	201.865
	2.28	101.682	198.891	111.732	206.094	97.7095	202.442
	2.3	101.203	199.248	111.593	206.495	97.279	203.114
	2.32	100.756	199.511	111.494	206.814	96.8864	203.834
	2.34	100.359	199.681	111.451	207.043	96.5555	204.551
	2.36	100.029	199.763	111.473	207.182	96.3063	205.211
	2.38	99.7756	199.769	111.558	207.238	96.1539	205.767
	2.4	99.6061	199.715	111.699	207.223	96.1067	206.182
	2.42	99.5217	199.618	111.882	207.156	96.1668	206.425
	2.44	99.5194	199.498	112.086	207.053	96.3298	206.485
	2.46	99.5921	199.372	112.291	206.935	96.5862	206.36
	2.48	99.7292	199.256	112.475	206.816	96.9227	206.064
	2.5	99.9172	199.161	112.615	206.707	97.3238	205.622
	2.52	100.14	199.095	112.696	206.61	97.7736	205.066
	2.54	100.381	199.056	112.702	206.525	98.257	204.434
	2.56	100.623	199.041	112.624	206.44	98.7613	203.768
	2.58	100.846	199.042	112.46	206.344	99.2759	203.105
	2.6	101.035	199.046	112.209	206.219	99.7925	202.481
	2.62	101.175	199.043	111.875	206.052	100.305	201.926
	2.64	101.256	199.021	111.466	205.829	100.807	201.463
	2.66	101.272	198.974	110.989	205.542	101.293	201.11
	2.68	101.223	198.897	110.455	205.189	101.758	200.876
	2.7	101.114	198.791	109.873	204.774	102.192	200.768
	2.72	100.959	198.663	109.252	204.308	102.588	200.783
	2.74	100.776	198.519	108.603	203.806	102.934	200.916
	2.76	100.586	198.373	107.935	203.287	103.22	201.157
	2.78	100.414	198.238	107.26	202.77	103.437	201.492
	2.8	100.284	198.126	106.589	202.277	103.576	201.903
	2.82	100.217	198.051	105.935	201.824	103.632	202.37
	2.84	100.23	198.025	105.313	201.426	103.603	202.869
	2.86	100.334	198.056	104.74	201.094	103.493	203.376
	2.88	100.529	198.152	104.232	200.838	103.306	203.868
	2.9	100.81	198.318	103.804	200.661	103.053	204.322
	2.92	101.165	198.554	103.472	200.567	102.747	204.717
	2.94	101.575	198.861	103.245	200.557	102.404	205.041
	2.96	102.018	199.233	103.131	200.63	102.04	205.282
	2.98	102.47	199.663	103.131	200.783	101.672	205.439
	3	102.908	200.142	103.239	201.015	101.316	205.516
	3.02	103.314	200.656	103.444	201.319	100.985	205.522
	3.04	103.67	201.189	103.726	201.689	100.693	205.47
	3.06	103.965	201.721	104.062	202.115	100.446	205.378
	3.08	104.193	202.234	104.422	202.584	100.25	205.261
	3.1	104.352	202.707	104.774	203.08	100.108	205.135
	3.12	104.444	203.122	105.083	203.587	100.018	205.012
	3.14	104.475	203.461	105.317	204.084	99.9783	204.899
	3.16	104.451	203.713	105.447	204.553	99.983	204.799
	3.18	104.382	203.867	105.446	204.974	100.027	204.708
	3.2	104.276	203.922	105.298	205.329	100.104	204.621
	3.22	104.144	203.879	104.994	205.606	100.208	204.53
	3.24	103.996	203.745	104.533	205.792	100.335	204.426
	3.26	103.84	203.531	103.924	205.881	100.481	204.303
	3.28	103.687	203.25	103.187	205.872	100.642	204.155
	3.3	103.544	202.919	102.347	205.766	100.815	203.983
	3.32	103.421	202.554	101.439	205.57	100.997	203.791
	3.34	103.324	202.169	100.497	205.295	101.185	203.588
	3.36	103.262	201.777	99.563	204.955	101.374	203.384
	3.38	103.239	201.39	98.6736	204.567	101.556	203.191
	3.4	103.26	201.017	97.8645	204.148	101.723	203.022
	3.42	103.328	200.664	97.1661	203.721	101.864	202.886
	3.44	103.447	200.336	96.6018	203.306	101.968	202.792
	3.46	103.618	200.039	96.1873	202.923	102.02	202.742
	3.48	103.841	199.777	95.9302	202.591	102.009	202.735
	3.5	104.117	199.556	95.83	202.326	101.924	202.765
	3.52	104.447	199.38	95.8794	202.14	101.756	202.823
	3.54	104.831	199.257	96.0654	202.042	101.503	202.897
	3.56	105.268	199.193	96.3709	202.035	101.165	202.974
	3.58	105.76	199.191	96.7771	202.118	100.753	203.043
	3.6	106.303	199.257	97.2645	202.286	100.279	203.092
	3.62	106.895	199.389	97.8149	202.529	99.7667	203.115
	3.64	107.528	199.584	98.412	202.835	99.241	203.11
	3.66	108.194	199.833	99.0421	203.193	98.7321	203.078
	3.68	108.878	200.127	99.6939	203.588	98.2714	203.027
	3.7	109.56	200.448	100.358	204.007	97.8892	202.969
	3.72	110.219	200.781	101.027	204.439	97.6119	202.921
	3.74	110.828	201.106	101.692	204.873	97.4599	202.902
	3.76	111.361	201.405	102.346	205.303	97.4454	202.933
	3.78	111.79	201.664	102.979	205.721	97.5706	203.032
	3.8	112.091	201.868	103.581	206.121	97.8275	203.218
	3.82	112.247	202.01	104.14	206.499	98.198	203.501
	3.84	112.247	202.087	104.645	206.85	98.6549	203.887
	3.86	112.088	202.1	105.083	207.168	99.1644	204.375
	3.88	111.779	202.055	105.446	207.45	99.6885	204.954
	3.9	111.337	201.963	105.727	207.69	100.188	205.607
	3.92	110.788	201.838	105.923	207.881	100.628	206.31
	3.94	110.164	201.694	106.034	208.02	100.977	207.034
	3.96	109.5	201.546	106.068	208.102	101.213	207.749
	3.98	108.832	201.41	106.035	208.124	101.325	208.424
	4	108.194	201.297	105.949	208.085	101.313	209.03
	4.02	107.613	201.218	105.827	207.987	101.188	209.547
	4.04	107.113	201.177	105.686	207.834	100.974	209.957
	4.06	106.704	201.176	105.545	207.632	100.699	210.251
	4.08	106.393	201.212	105.419	207.392	100.4	210.429
	4.1	106.174	201.274	105.32	207.127	100.114	210.493
	4.12	106.037	201.353	105.255	206.852	99.8764	210.452
	4.14	105.966	201.433	105.227	206.585	99.72	210.317
	4.16	105.942	201.498	105.233	206.342	99.6689	210.099
	4.18	105.947	201.531	105.264	206.142	99.7383	209.807
	4.2	105.961	201.517	105.31	206	99.9336	209.451
	4.22	105.97	201.445	105.355	205.927	100.25	209.034
	4.24	105.962	201.307	105.384	205.932	100.673	208.561
	4.26	105.932	201.098	105.38	206.017	101.18	208.036
	4.28	105.877	200.823	105.329	206.18	101.745	207.462
	4.3	105.801	200.487	105.221	206.413	102.336	206.847
	4.32	105.709	200.103	105.048	206.704	102.921	206.203
	4.34	105.609	199.688	104.808	207.039	103.47	205.547
	4.36	105.511	199.26	104.501	207.401	103.955	204.899
	4.38	105.423	198.84	104.133	207.776	104.354	204.286
	4.4	105.353	198.446	103.712	208.15	104.653	203.735
	4.42	105.306	198.096	103.25	208.512	104.841	203.27
	4.44	105.284	197.805	102.761	208.856	104.917	202.914
	4.46	105.286	197.581	102.258	209.178	104.886	202.683
	4.48	105.309	197.43	101.757	209.474	104.759	202.585
	4.5	105.349	197.351	101.272	209.745	104.554	202.619
	4.52	105.399	197.338	100.82	209.986	104.289	202.775
	4.54	105.451	197.382	100.414	210.196	103.986	203.037
	4.56	105.498	197.47	100.067	210.366	103.668	203.382
	4.58	105.534	197.587	99.7913	210.488	103.354	203.787
	4.6	105.553	197.72	99.5968	210.549	103.062	204.23
	4.62	105.55	197.856	99.4905	210.537	102.804	204.69
	4.64	105.524	197.984	99.4762	210.439	102.586	205.154
	4.66	105.472	198.098	99.5536	210.247	102.41	205.616
	4.68	105.395	198.193	99.7181	209.953	102.271	206.074
	4.7	105.294	198.269	99.9609	209.557	102.158	206.533
	4.72	105.17	198.328	100.269	209.066	102.06	207.003
	4.74	105.028	198.374	100.624	208.491	101.961	207.496
	4.76	104.871	198.411	101.008	207.848	101.847	208.021
	4.78	104.705	198.442	101.401	207.159	101.703	208.589
	4.8	104.536	198.468	101.78	206.447	101.52	209.206
	4.82	104.371	198.49	102.129	205.734	101.292	209.873
	4.84	104.218	198.503	102.431	205.043	101.02	210.589
	4.86	104.087	198.504	102.675	204.393	100.707	211.348
	4.88	103.985	198.485	102.854	203.799	100.364	212.141
	4.9	103.92	198.44	102.965	203.269	100.006	212.957
	4.92	103.899	198.366	103.01	202.811	99.6501	213.781
	4.94	103.925	198.259	102.994	202.426	99.3142	214.598
	4.96	104	198.121	102.924	202.113	99.0171	215.389
	4.98	104.121	197.956	102.809	201.866	98.7752	216.136
	5	104.282	197.776	102.66	201.68	98.6022	216.818
	5.02	104.474	197.593	102.486	201.55	98.507	217.415
	5.04	104.686	197.424	102.3	201.468	98.494	217.906
	5.06	104.905	197.287	102.112	201.427	98.5624	218.272
	5.08	105.118	197.198	101.935	201.422	98.7069	218.499
	5.1	105.312	197.171	101.782	201.446	98.9178	218.576
	5.12	105.48	197.217	101.668	201.495	99.1825	218.5
	5.14	105.613	197.338	101.607	201.564	99.4861	218.276
	5.16	105.709	197.533	101.615	201.651	99.813	217.915
	5.18	105.767	197.792	101.707	201.751	100.148	217.438
	5.2	105.79	198.1	101.894	201.866	100.476	216.871
	5.22	105.78	198.436	102.187	201.996	100.784	216.245
	5.24	105.743	198.778	102.589	202.144	101.062	215.592
	5.26	105.678	199.102	103.1	202.314	101.302	214.943
	5.28	105.587	199.387	103.711	202.512	101.496	214.326
	5.3	105.467	199.615	104.409	202.744	101.643	213.761
	5.32	105.313	199.773	105.175	203.016	101.738	213.262
	5.34	105.117	199.855	105.982	203.331	101.783	212.833
	5.36	104.871	199.86	106.804	203.692	101.78	212.471
	5.38	104.568	199.795	107.611	204.097	101.733	212.166
	5.4	104.203	199.67	108.373	204.545	101.647	211.903
	5.42	103.775	199.502	109.064	205.028	101.531	211.664
	5.44	103.286	199.309	109.66	205.539	101.395	211.43
	5.46	102.745	199.109	110.144	206.067	101.249	211.183
	5.48	102.166	198.923	110.506	206.603	101.104	210.907
	5.5	101.567	198.768	110.74	207.135	100.973	210.592
	5.52	100.971	198.661	110.849	207.654	100.864	210.23
	5.54	100.402	198.611	110.844	208.151	100.786	209.82
	5.56	99.8854	198.626	110.737	208.617	100.741	209.361
	5.58	99.4436	198.709	110.547	209.042	100.73	208.859
	5.6	99.0973	198.855	110.295	209.418	100.748	208.319
	5.62	98.8627	199.054	110.001	209.734	100.785	207.751
	5.64	98.7503	199.291	109.688	209.977	100.828	207.163
	5.66	98.7652	199.544	109.373	210.135	100.863	206.565
	5.68	98.9068	199.788	109.073	210.191	100.873	205.97
	5.7	99.1695	199.998	108.803	210.131	100.843	205.39
	5.72	99.5438	200.144	108.571	209.941	100.759	204.838
	5.74	100.017	200.201	108.385	209.612	100.613	204.328
	5.76	100.576	200.151	108.248	209.139	100.4	203.875
	5.78	101.205	199.979	108.161	208.524	100.12	203.494
	5.8	101.89	199.683	108.123	207.778	99.7776	203.196
	5.82	102.619	199.269	108.131	206.922	99.3829	202.991
	5.84	103.379	198.756	108.18	205.986	98.9475	202.885
	5.86	104.16	198.173	108.265	205.005	98.4853	202.876
	5.88	104.952	197.557	108.381	204.023	98.011	202.957
	5.9	105.744	196.95	108.521	203.082	97.5383	203.115
	5.92	106.529	196.397	108.684	202.225	97.08	203.33
	5.94	107.295	195.942	108.864	201.488	96.6469	203.576
	5.96	108.033	195.62	109.063	200.899	96.248	203.825
	5.98	108.73	195.46	109.282	200.477	95.8906	204.048
	6	109.378	195.478	109.522	200.229	95.5803	204.219
	6.02	109.964	195.674	109.788	200.151	95.3219	204.314
	6.04	110.479	196.038	110.084	200.231	95.1191	204.318
	6.06	110.915	196.546	110.412	200.451	94.9748	204.224
	6.08	111.265	197.163	110.772	200.786	94.891	204.036
	6.1	111.524	197.848	111.159	201.214	94.8683	203.764
	6.12	111.689	198.557	111.568	201.715	94.9062	203.43
	6.14	111.761	199.247	111.984	202.269	95.0021	203.059
	6.16	111.739	199.879	112.393	202.866	95.1515	202.684
	6.18	111.629	200.422	112.776	203.496	95.348	202.333
	6.2	111.434	200.855	113.115	204.157	95.5831	202.037
	6.22	111.161	201.167	113.391	204.845	95.8472	201.818
	6.24	110.82	201.354	113.592	205.56	96.1296	201.692
	6.26	110.418	201.425	113.709	206.299	96.4192	201.665
	6.28	109.969	201.394	113.739	207.057	96.7053	201.734
	6.3	109.483	201.279	113.689	207.825	96.9778	201.887
	6.32	108.975	201.102	113.57	208.59	97.2273	202.105
	6.34	108.457	200.884	113.399	209.335	97.4459	202.362
	6.36	107.945	200.646	113.197	210.039	97.6266	202.633
	6.38	107.45	200.404	112.986	210.68	97.7635	202.891
	6.4	106.986	200.175	112.787	211.236	97.8522	203.113
	6.42	106.563	199.969	112.618	211.687	97.8894	203.284
	6.44	106.189	199.795	112.491	212.012	97.8734	203.393
	6.46	105.869	199.656	112.417	212.2	97.8044	203.439
	6.48	105.606	199.555	112.397	212.242	97.6846	203.427
	6.5	105.398	199.491	112.431	212.137	97.5187	203.369
	6.52	105.243	199.461	112.512	211.892	97.3133	203.279
	6.54	105.134	199.459	112.636	211.52	97.0775	203.175
	6.56	105.062	199.478	112.793	211.042	96.8218	203.072
	6.58	105.018	199.509	112.977	210.485	96.5579	202.984
	6.6	104.99	199.542	113.183	209.879	96.2979	202.919
	6.62	104.968	199.567	113.407	209.259	96.0532	202.881
	6.64	104.943	199.573	113.646	208.657	95.834	202.867
	6.66	104.905	199.552	113.901	208.104	95.6488	202.87
	6.68	104.85	199.496	114.17	207.629	95.5039	202.88
	6.7	104.772	199.402	114.451	207.251	95.4034	202.884
	6.72	104.673	199.269	114.742	206.984	95.3491	202.874
	6.74	104.551	199.1	115.036	206.833	95.3409	202.839
	6.76	104.412	198.902	115.325	206.793	95.3771	202.777
	6.78	104.259	198.684	115.599	206.854	95.4547	202.69
	6.8	104.096	198.458	115.844	206.997	95.5696	202.583
	6.82	103.928	198.239	116.048	207.2	95.7169	202.47
	6.84	103.756	198.039	116.197	207.437	95.8912	202.364
	6.86	103.581	197.871	116.277	207.685	96.0866	202.283
	6.88	103.398	197.748	116.278	207.918	96.2973	202.244
	6.9	103.2	197.677	116.192	208.119	96.5174	202.259
	6.92	102.979	197.665	116.013	208.273	96.7413	202.338
	6.94	102.722	197.716	115.741	208.371	96.9639	202.482
	6.96	102.417	197.828	115.376	208.412	97.181	202.689
	6.98	102.054	198.002	114.922	208.4	97.3891	202.945
	7	101.626	198.232	114.384	208.345	97.5854	203.233
	7.02	101.13	198.513	113.77	208.259	97.7679	203.53
	7.04	100.569	198.839	113.088	208.158	97.935	203.809
	7.06	99.9544	199.203	112.349	208.06	98.0852	204.044
	7.08	99.3048	199.598	111.565	207.978	98.2168	204.209
	7.1	98.6446	200.015	110.75	207.927	98.3283	204.285
	7.12	98.0034	200.448	109.919	207.916	98.4177	204.259
	7.14	97.4129	200.888	109.091	207.948	98.483	204.125
	7.16	96.9045	201.327	108.287	208.023	98.5227	203.889
	7.18	96.506	201.757	107.529	208.135	98.5355	203.566
	7.2	96.239	202.169	106.841	208.274	98.5213	203.179
	7.22	96.1163	202.553	106.245	208.427	98.4809	202.759
	7.24	96.1405	202.901	105.762	208.581	98.4161	202.34
	7.26	96.3035	203.205	105.407	208.722	98.3299	201.961
	7.28	96.5874	203.456	105.192	208.841	98.2256	201.656
	7.3	96.9655	203.649	105.12	208.932	98.1067	201.456
	7.32	97.4051	203.78	105.186	208.993	97.9765	201.385
	7.34	97.8705	203.848	105.378	209.03	97.8374	201.459
	7.36	98.3263	203.856	105.675	209.052	97.6913	201.68
	7.38	98.7398	203.809	106.053	209.071	97.539	202.044
	7.4	99.0847	203.717	106.481	209.103	97.3813	202.534
	7.42	99.3422	203.595	106.929	209.161	97.2186	203.126
	7.44	99.5024	203.457	107.369	209.255	97.0524	203.791
	7.46	99.5645	203.323	107.774	209.393	96.885	204.493
	7.48	99.5356	203.21	108.125	209.575	96.7206	205.199
	7.5	99.4298	203.138	108.409	209.796	96.5647	205.875
	7.52	99.2656	203.121	108.62	210.045	96.4244	206.49
	7.54	99.0638	203.172	108.756	210.308	96.3078	207.021
	7.56	98.8453	203.298	108.824	210.566	96.2227	207.449
	7.58	98.6287	203.501	108.831	210.802	96.1764	207.76
	7.6	98.4288	203.774	108.785	211	96.1742	207.95
	7.62	98.2562	204.108	108.697	211.147	96.2189	208.02
	7.64	98.116	204.486	108.574	211.235	96.3102	207.974
	7.66	98.0092	204.885	108.421	211.262	96.4446	207.823
	7.68	97.9328	205.282	108.24	211.23	96.6154	207.581
	7.7	97.8811	205.65	108.034	211.146	96.8133	207.262
	7.72	97.8473	205.965	107.802	211.02	97.0274	206.883
	7.74	97.8242	206.202	107.545	210.863	97.2454	206.46
	7.76	97.8054	206.345	107.264	210.685	97.4553	206.008
	7.78	97.7857	206.381	106.959	210.495	97.6455	205.539
	7.8	97.7613	206.304	106.635	210.301	97.8059	205.065
	7.82	97.7295	206.116	106.296	210.108	97.928	204.593
	7.84	97.6885	205.828	105.948	209.918	98.005	204.13
	7.86	97.6368	205.453	105.595	209.732	98.0321	203.679
	7.88	97.5726	205.011	105.242	209.554	98.0057	203.241
	7.9	97.4939	204.525	104.892	209.384	97.9236	202.82
	7.92	97.3984	204.018	104.548	209.226	97.7845	202.416
	7.94	97.2839	203.509	104.211	209.084	97.5879	202.031
	7.96	97.1487	203.017	103.881	208.964	97.3341	201.669
	7.98	96.9923	202.552	103.559	208.869	97.0243	201.334
	8	96.816	202.121	103.245	208.803	96.6612	201.033
	8.02	96.6234	201.722	102.943	208.768	96.2493	200.771
	8.04	96.4198	201.351	102.657	208.762	95.7953	200.557
	8.06	96.2128	200.998	102.393	208.78	95.3088	200.397
	8.08	96.0105	200.652	102.162	208.816	94.8024	200.299
	8.1	95.8216	200.306	101.972	208.86	94.2909	200.265
	8.12	95.6534	199.952	101.835	208.903	93.7915	200.299
	8.14	95.5113	199.59	101.761	208.939	93.3221	200.399
	8.16	95.3978	199.225	101.759	208.962	92.9005	200.561
	8.18	95.3124	198.867	101.836	208.97	92.5426	200.779
	8.2	95.2518	198.534	101.994	208.966	92.2612	201.044
	8.22	95.2103	198.245	102.233	208.957	92.065	201.342
	8.24	95.1813	198.021	102.547	208.949	91.9581	201.661
	8.26	95.1584	197.881	102.929	208.951	91.9397	201.987
	8.28	95.1367	197.838	103.365	208.972	92.0053	202.306
	8.3	95.1138	197.9	103.84	209.015	92.1468	202.608
	8.32	95.0906	198.064	104.336	209.08	92.355	202.882
	8.34	95.0708	198.322	104.836	209.165	92.62	203.124
	8.36	95.0607	198.654	105.321	209.259	92.9327	203.331
	8.38	95.068	199.038	105.773	209.35	93.2855	203.505
	8.4	95.1001	199.445	106.175	209.424	93.6724	203.651
	8.42	95.1629	199.848	106.515	209.467	94.0886	203.776
	8.44	95.2596	200.222	106.782	209.464	94.5293	203.892
	8.46	95.3895	200.549	106.968	209.406	94.9894	204.009
	8.48	95.5482	200.817	107.07	209.287	95.4616	204.137
	8.5	95.7278	201.02	107.087	209.105	95.9361	204.288
	8.52	95.9177	201.163	107.024	208.865	96.4005	204.47
	8.54	96.1066	201.254	106.887	208.574	96.8397	204.69
	8.56	96.2832	201.308	106.685	208.245	97.2371	204.954
	8.58	96.4385	201.34	106.43	207.892	97.5763	205.262
	8.6	96.5666	201.364	106.136	207.532	97.8423	205.614
	8.62	96.6652	201.395	105.815	207.179	98.0237	206.006
	8.64	96.7362	201.442	105.482	206.853	98.1142	206.431
	8.66	96.7845	201.511	105.15	206.568	98.1135	206.88
	8.68	96.8177	201.602	104.83	206.34	98.0279	207.341
	8.7	96.8444	201.715	104.535	206.184	97.8705	207.798
	8.72	96.8729	201.842	104.272	206.115	97.6601	208.237
	8.74	96.91	201.978	104.049	206.146	97.4197	208.64
	8.76	96.9596	202.113	103.872	206.288	97.1753	208.994
	8.78	97.0227	202.24	103.746	206.55	96.9536	209.286
	8.8	97.0966	202.352	103.675	206.938	96.7799	209.506
	8.82	97.1754	202.443	103.662	207.451	96.6764	209.649
	8.84	97.251	202.51	103.709	208.082	96.6601	209.717
	8.86	97.3133	202.551	103.819	208.819	96.7423	209.716
	8.88	97.3518	202.57	103.992	209.638	96.9273	209.656
	8.9	97.3566	202.57	104.231	210.512	97.2122	209.553
	8.92	97.3188	202.562	104.534	211.406	97.5877	209.425
	8.94	97.232	202.555	104.899	212.284	98.0389	209.291
	8.96	97.0923	202.565	105.324	213.107	98.5463	209.169
	8.98	96.8986	202.605	105.801	213.843	99.0881	209.076
	9	96.6529	202.691	106.32	214.465	99.6419	209.023
	9.02	96.3601	202.834	106.868	214.957	100.186	209.019
	9.04	96.0278	203.045	107.43	215.313	100.703	209.064
	9.06	95.666	203.327	107.985	215.542	101.176	209.156
	9.08	95.2869	203.679	108.515	215.661	101.598	209.287
	9.1	94.9043	204.091	108.998	215.697	101.963	209.444
	9.12	94.5334	204.549	109.415	215.681	102.272	209.612
	9.14	94.19	205.032	109.751	215.643	102.528	209.775
	9.16	93.8901	205.516	109.994	215.61	102.737	209.917
	9.18	93.6487	205.975	110.139	215.598	102.907	210.025
	9.2	93.4789	206.384	110.188	215.613	103.043	210.087
	9.22	93.3911	206.72	110.149	215.649	103.15	210.097
	9.24	93.3919	206.966	110.034	215.688	103.227	210.051
	9.26	93.4828	207.111	109.861	215.701	103.272	209.953
	9.28	93.6603	207.15	109.652	215.657	103.278	209.807
	9.3	93.9151	207.085	109.427	215.521	103.235	209.623
	9.32	94.2329	206.923	109.206	215.265	103.129	209.414
	9.34	94.5948	206.674	109.006	214.87	102.95	209.192
	9.36	94.979	206.351	108.838	214.327	102.684	208.97
	9.38	95.3625	205.965	108.709	213.643	102.324	208.759
	9.4	95.7229	205.527	108.62	212.839	101.866	208.567
	9.42	96.0406	205.046	108.565	211.949	101.312	208.4
	9.44	96.3006	204.527	108.536	211.016	100.668	208.258
	9.46	96.4938	203.975	108.52	210.09	99.9472	208.137
	9.48	96.6179	203.393	108.5	209.22	99.1675	208.028
	9.5	96.6775	202.785	108.462	208.45	98.3494	207.92
	9.52	96.6836	202.158	108.388	207.817	97.5161	207.802
	9.54	96.652	201.521	108.267	207.345	96.6916	207.66
	9.56	96.6022	200.887	108.089	207.043	95.899	207.487
	9.58	96.555	200.274	107.848	206.907	95.16	207.277
	9.6	96.531	199.702	107.544	206.919	94.4942	207.033
	9.62	96.5483	199.191	107.185	207.05	93.9182	206.762
	9.64	96.6213	198.763	106.782	207.265	93.4459	206.48
	9.66	96.76	198.437	106.352	207.525	93.088	206.208
	9.68	96.9691	198.228	105.916	207.791	92.8521	205.97
	9.7	97.2484	198.144	105.498	208.031	92.7425	205.791
	9.72	97.5927	198.186	105.123	208.218	92.7595	205.693
	9.74	97.9932	198.35	104.814	208.332	92.8996	205.692
	9.76	98.4376	198.623	104.592	208.364	93.1548	205.794
	9.78	98.9111	198.987	104.472	208.312	93.5122	205.999
	9.8	99.3974	199.42	104.461	208.178	93.9548	206.293
	9.82	99.8792	199.895	104.561	207.972	94.4614	206.653
	9.84	100.339	200.387	104.767	207.703	95.0075	207.052
	9.86	100.759	200.868	105.065	207.383	95.5671	207.455
	9.88	101.123	201.315	105.438	207.022	96.1142	207.829
	9.9	101.418	201.705	105.864	206.634	96.6243	208.143
	9.92	101.629	202.02	106.319	206.228	97.0768	208.372
	9.94	101.75	202.245	106.778	205.818	97.4561	208.5
	9.96	101.775	202.369	107.218	205.418	97.7525	208.52
	9.98	101.703	202.387	107.62	205.043	97.9637	208.434
	10	101.541	202.297	107.968	204.711	98.0935	208.254
	10.02	101.296	202.103	108.249	204.439	98.1522	207.997
	10.04	100.982	201.814	108.456	204.246	98.1547	207.684
	10.06	100.618	201.445	108.586	204.145	98.1194	207.34
	10.08	100.222	201.014	108.642	204.147	98.0661	206.984
	10.1	99.815	200.548	108.627	204.257	98.0148	206.635
	10.12	99.4194	200.075	108.549	204.472	97.9834	206.306
	10.14	99.055	199.628	108.421	204.78	97.987	206.002
	10.16	98.7405	199.237	108.252	205.165	98.0368	205.726
	10.18	98.4915	198.934	108.057	205.601	98.1391	205.471
	10.2	98.3206	198.747	107.849	206.061	98.2956	205.231
	10.22	98.2368	198.694	107.642	206.514	98.5031	204.995
	10.24	98.2451	198.786	107.445	206.931	98.7539	204.753
	10.26	98.3465	199.024	107.269	207.288	99.0366	204.495
	10.28	98.5383	199.396	107.122	207.566	99.3369	204.218
	10.3	98.8142	199.881	107.008	207.752	99.6386	203.92
	10.32	99.1645	200.446	106.929	207.846	99.9244	203.605
	10.34	99.5773	201.052	106.884	207.854	100.178	203.281
	10.36	100.039	201.655	106.871	207.79	100.384	202.961
	10.38	100.535	202.211	106.886	207.676	100.53	202.659
	10.4	101.051	202.68	106.923	207.536	100.609	202.393
	10.42	101.574	203.025	106.975	207.396	100.616	202.18
	10.44	102.095	203.224	107.034	207.282	100.554	202.033
	10.46	102.605	203.262	107.094	207.213	100.429	201.967
	10.48	103.099	203.139	107.147	207.203	100.251	201.99
	10.5	103.573	202.864	107.187	207.258	100.036	202.107
	10.52	104.026	202.459	107.208	207.374	99.7986	202.321
	10.54	104.458	201.953	107.206	207.542	99.5574	202.628
	10.56	104.866	201.377	107.178	207.744	99.3279	203.024
	10.58	105.248	200.765	107.123	207.959	99.1237	203.499
	10.6	105.6	200.149	107.045	208.163	98.9547	204.044
	10.62	105.917	199.556	106.946	208.335	98.8264	204.648
	10.64	106.191	199.004	106.833	208.457	98.7397	205.297
	10.66	106.417	198.506	106.714	208.514	98.6913	205.979
	10.68	106.587	198.066	106.597	208.501	98.6742	206.681
	10.7	106.698	197.684	106.49	208.417	98.6792	207.388
	10.72	106.746	197.352	106.401	208.267	98.696	208.087
	10.74	106.733	197.064	106.334	208.064	98.7147	208.764
	10.76	106.662	196.812	106.293	207.822	98.7271	209.405
	10.78	106.54	196.59	106.276	207.555	98.7277	209.995
	10.8	106.374	196.395	106.28	207.279	98.7142	210.524
	10.82	106.175	196.227	106.301	207.008	98.6877	210.98
	10.84	105.951	196.089	106.332	206.756	98.6524	211.358
	10.86	105.71	195.984	106.363	206.531	98.6152	211.653
	10.88	105.46	195.917	106.389	206.344	98.5843	211.868
	10.9	105.204	195.887	106.403	206.2	98.5684	212.009
	10.92	104.946	195.891	106.399	206.107	98.5758	212.086
	10.94	104.687	195.923	106.375	206.073	98.613	212.116
	10.96	104.429	195.968	106.329	206.103	98.6844	212.115
	10.98	104.17	196.012	106.262	206.204	98.7911	212.102
	11	103.913	196.037	106.177	206.382	98.9315	212.093
	11.02	103.658	196.026	106.075	206.64	99.1007	212.101
	11.04	103.408	195.967	105.96	206.978	99.2908	212.136
	11.06	103.166	195.854	105.837	207.392	99.4919	212.202
	11.08	102.938	195.687	105.707	207.873	99.6919	212.295
	11.1	102.73	195.477	105.575	208.407	99.8777	212.406
	11.12	102.549	195.245	105.445	208.977	100.036	212.521
	11.14	102.403	195.016	105.32	209.559	100.153	212.624
	11.16	102.3	194.823	105.205	210.132	100.218	212.697
	11.18	102.247	194.697	105.104	210.672	100.22	212.723
	11.2	102.252	194.668	105.023	211.156	100.152	212.688
	11.22	102.319	194.758	104.966	211.567	100.009	212.585
	11.24	102.45	194.981	104.939	211.89	99.7916	212.412
	11.26	102.645	195.334	104.946	212.116	99.5019	212.173
	11.28	102.9	195.806	104.992	212.24	99.1475	211.881
	11.3	103.205	196.368	105.078	212.264	98.7391	211.55
	11.32	103.549	196.984	105.206	212.19	98.291	211.202
	11.34	103.916	197.609	105.374	212.028	97.8201	210.858
	11.36	104.288	198.196	105.58	211.787	97.3455	210.537
	11.38	104.646	198.697	105.822	211.479	96.8871	210.256
	11.4	104.972	199.075	106.097	211.119	96.4649	210.028
	11.42	105.249	199.301	106.402	210.722	96.0979	209.855
	11.44	105.462	199.36	106.733	210.303	95.8028	209.736
	11.46	105.603	199.255	107.091	209.88	95.5931	209.659
	11.48	105.665	199.001	107.475	209.471	95.4782	209.608
	11.5	105.648	198.628	107.886	209.092	95.4628	209.562
	11.52	105.558	198.179	108.324	208.759	95.5464	209.497
	11.54	105.401	197.699	108.789	208.485	95.7231	209.391
	11.56	105.188	197.237	109.28	208.28	95.9822	209.223
	11.58	104.934	196.838	109.791	208.149	96.3082	208.977
	11.6	104.651	196.537	110.315	208.09	96.6823	208.645
	11.62	104.355	196.36	110.839	208.097	97.0834	208.227
	11.64	104.06	196.318	111.347	208.157	97.4889	207.73
	11.66	103.78	196.406	111.82	208.255	97.877	207.17
	11.68	103.527	196.609	112.233	208.371	98.2274	206.566
	11.7	103.314	196.898	112.564	208.485	98.5228	205.944
	11.72	103.149	197.238	112.785	208.579	98.7498	205.33
	11.74	103.04	197.591	112.876	208.64	98.8999	204.751
	11.76	102.991	197.921	112.816	208.656	98.9693	204.229
	11.78	103.003	198.196	112.592	208.626	98.9592	203.784
	11.8	103.075	198.39	112.198	208.553	98.8754	203.429
	11.82	103.202	198.49	111.635	208.444	98.7273	203.17
	11.84	103.374	198.489	110.916	208.313	98.5269	203.009
	11.86	103.58	198.39	110.061	208.173	98.288	202.941
	11.88	103.807	198.204	109.1	208.039	98.0245	202.956
	11.9	104.041	197.946	108.073	207.924	97.75	203.041
	11.92	104.267	197.631	107.024	207.836	97.4763	203.181
	11.94	104.474	197.275	105.998	207.781	97.2136	203.361
	11.96	104.652	196.891	105.045	207.762	96.9697	203.564
	11.98	104.793	196.49	104.208	207.776	96.7502	203.779
	12	104.894	196.08	103.523	207.819	96.5592	203.994
	12.02	104.955	195.665	103.02	207.887	96.3992	204.203
	12.04	104.976	195.249	102.715	207.977	96.2714	204.404
	12.06	104.96	194.835	102.61	208.085	96.1762	204.597
	12.08	104.911	194.43	102.697	208.212	96.113	204.787
	12.1	104.832	194.039	102.954	208.362	96.08	204.982
	12.12	104.724	193.673	103.351	208.54	96.0743	205.19
	12.14	104.589	193.343	103.851	208.752	96.0911	205.42
	12.16	104.427	193.062	104.413	209.007	96.1238	205.681
	12.18	104.239	192.841	104.998	209.313	96.1647	205.98
	12.2	104.026	192.694	105.569	209.677	96.2051	206.318
	12.22	103.792	192.631	106.097	210.105	96.2366	206.694
	12.24	103.543	192.658	106.559	210.598	96.2524	207.105
	12.26	103.289	192.782	106.942	211.157	96.2487	207.542
	12.28	103.042	193.002	107.244	211.781	96.2263	207.993
	12.3	102.816	193.319	107.468	212.461	96.191	208.446
	12.32	102.629	193.727	107.623	213.191	96.1543	208.886
	12.34	102.497	194.218	107.723	213.958	96.1325	209.303
	12.36	102.435	194.782	107.785	214.749	96.1453	209.684
	12.38	102.456	195.404	107.824	215.546	96.2134	210.022
	12.4	102.569	196.068	107.853	216.332	96.3562	210.311
	12.42	102.779	196.753	107.883	217.089	96.5884	210.55
	12.44	103.088	197.437	107.919	217.798	96.9181	210.741
	12.46	103.491	198.097	107.964	218.441	97.3443	210.886
	12.48	103.981	198.71	108.015	219.005	97.8566	210.992
	12.5	104.548	199.253	108.065	219.474	98.4352	211.066
	12.52	105.176	199.71	108.104	219.84	99.0525	211.117
	12.54	105.851	200.069	108.121	220.098	99.6757	211.152
	12.56	106.555	200.326	108.104	220.244	100.269	211.18
	12.58	107.269	200.483	108.042	220.28	100.8	211.21
	12.6	107.973	200.55	107.925	220.212	101.238	211.247
	12.62	108.648	200.547	107.746	220.047	101.56	211.3
	12.64	109.275	200.495	107.505	219.798	101.752	211.373
	12.66	109.839	200.42	107.202	219.479	101.809	211.469
	12.68	110.324	200.351	106.844	219.108	101.734	211.593
	12.7	110.722	200.313	106.44	218.706	101.54	211.742
	12.72	111.028	200.328	106.003	218.295	101.242	211.916
	12.74	111.242	200.413	105.546	217.9	100.862	212.111
	12.76	111.369	200.579	105.083	217.545	100.422	212.319
	12.78	111.421	200.829	104.627	217.255	99.9448	212.533
	12.8	111.41	201.16	104.187	217.051	99.4534	212.741
	12.82	111.355	201.562	103.772	216.95	98.9681	212.932
	12.84	111.271	202.019	103.387	216.964	98.508	213.093
	12.86	111.175	202.511	103.037	217.096	98.0904	213.212
	12.88	111.08	203.017	102.725	217.341	97.7308	213.277
	12.9	110.995	203.514	102.452	217.689	97.4429	213.279
	12.92	110.926	203.98	102.222	218.117	97.2379	213.211
	12.94	110.873	204.396	102.04	218.601	97.1245	213.069
	12.96	110.834	204.748	101.912	219.108	97.1073	212.855
	12.98	110.802	205.025	101.845	219.608	97.1865	212.573
	13	110.77	205.223	101.847	220.068	97.3573	212.232
	13.02	110.733	205.341	101.924	220.462	97.6092	211.844
	13.04	110.685	205.386	102.082	220.768	97.9269	211.425
	13.06	110.624	205.368	102.322	220.971	98.2905	210.993
	13.08	110.551	205.3	102.642	221.062	98.6775	210.565
	13.1	110.468	205.2	103.036	221.041	99.0638	210.159
	13.12	110.384	205.083	103.492	220.911	99.4265	209.792
	13.14	110.306	204.966	103.993	220.68	99.7449	209.475
	13.16	110.242	204.864	104.519	220.357	100.003	209.217
	13.18	110.198	204.791	105.049	219.95	100.19	209.022
	13.2	110.178	204.756	105.558	219.465	100.301	208.888
	13.22	110.182	204.763	106.025	218.907	100.338	208.811
	13.24	110.206	204.816	106.429	218.276	100.309	208.782
	13.26	110.24	204.912	106.755	217.571	100.223	208.791
	13.28	110.272	205.045	106.988	216.79	100.096	208.827
	13.3	110.287	205.207	107.124	215.932	99.943	208.881
	13.32	110.265	205.385	107.159	215	99.78	208.945
	13.34	110.192	205.567	107.099	213.999	99.621	209.01
	13.36	110.05	205.738	106.95	212.944	99.478	209.074
	13.38	109.828	205.884	106.726	211.853	99.3596	209.131
	13.4	109.52	205.993	106.441	210.752	99.2715	209.178
	13.42	109.122	206.053	106.113	209.669	99.2159	209.209
	13.44	108.639	206.056	105.757	208.636	99.1923	209.215
	13.46	108.079	205.995	105.392	207.684	99.198	209.187
	13.48	107.458	205.867	105.032	206.843	99.2286	209.109
	13.5	106.792	205.673	104.692	206.135	99.2784	208.965
	13.52	106.102	205.416	104.38	205.573	99.3415	208.74
	13.54	105.407	205.102	104.106	205.165	99.4118	208.419
	13.56	104.728	204.741	103.874	204.904	99.4835	207.991
	13.58	104.084	204.341	103.684	204.777	99.5511	207.451
	13.6	103.49	203.916	103.535	204.761	99.6094	206.803
	13.62	102.956	203.478	103.421	204.825	99.6539	206.058
	13.64	102.493	203.038	103.335	204.938	99.6799	205.236
	13.66	102.104	202.61	103.268	205.065	99.683	204.365
	13.68	101.789	202.202	103.21	205.173	99.6586	203.479
	13.7	101.548	201.823	103.151	205.236	99.6018	202.615
	13.72	101.375	201.477	103.08	205.231	99.5078	201.809
	13.74	101.264	201.164	102.991	205.147	99.3718	201.098
	13.76	101.208	200.884	102.876	204.979	99.1896	200.513
	13.78	101.201	200.629	102.734	204.732	98.958	200.076
	13.8	101.233	200.393	102.564	204.419	98.6755	199.804
	13.82	101.298	200.164	102.371	204.06	98.3435	199.704
	13.84	101.388	199.933	102.163	203.68	97.9663	199.772
	13.86	101.495	199.69	101.95	203.306	97.5516	199.997
	13.88	101.614	199.427	101.746	202.966	97.1111	200.359
	13.9	101.737	199.14	101.564	202.683	96.6593	200.833
	13.92	101.858	198.83	101.421	202.478	96.2133	201.389
	13.94	101.969	198.499	101.329	202.365	95.7909	201.993
	13.96	102.067	198.157	101.3	202.351	95.4096	202.613
	13.98	102.145	197.814	101.341	202.435	95.0843	203.217
	14	102.2	197.484	101.456	202.61	94.8264	203.777
	14.02	102.231	197.181	101.644	202.865	94.6422	204.272
	14.04	102.235	196.918	101.896	203.182	94.5324	204.685
	14.06	102.216	196.707	102.2	203.542	94.4925	205.009
	14.08	102.174	196.553	102.541	203.928	94.5131	205.241
	14.1	102.113	196.459	102.896	204.321	94.5817	205.387
	14.12	102.039	196.425	103.245	204.708	94.6839	205.455
	14.14	101.955	196.443	103.564	205.076	94.8057	205.458
	14.16	101.868	196.505	103.831	205.416	94.9348	205.409
	14.18	101.782	196.6	104.026	205.724	95.0619	205.32
	14.2	101.703	196.718	104.132	205.997	95.1816	205.2
	14.22	101.635	196.847	104.14	206.232	95.2924	205.055
	14.24	101.581	196.982	104.043	206.429	95.3963	204.888
	14.26	101.547	197.118	103.843	206.589	95.4975	204.697
	14.28	101.535	197.254	103.547	206.712	95.6022	204.48
	14.3	101.547	197.395	103.169	206.799	95.7162	204.233
	14.32	101.587	197.547	102.73	206.85	95.8446	203.955
	14.34	101.657	197.718	102.252	206.867	95.9906	203.647
	14.36	101.757	197.917	101.765	206.854	96.155	203.313
	14.38	101.889	198.151	101.296	206.815	96.3365	202.964
	14.4	102.053	198.424	100.875	206.754	96.5317	202.612
	14.42	102.247	198.738	100.526	206.678	96.7357	202.272
	14.44	102.471	199.09	100.27	206.592	96.9432	201.964
	14.46	102.722	199.472	100.123	206.502	97.1488	201.703
	14.48	102.997	199.873	100.09	206.41	97.3478	201.503
	14.5	103.293	200.277	100.172	206.318	97.5365	201.376
	14.52	103.606	200.667	100.36	206.225	97.7126	201.325
	14.54	103.933	201.026	100.64	206.127	97.875	201.349
	14.56	104.268	201.335	100.99	206.017	98.0231	201.442
	14.58	104.608	201.581	101.388	205.887	98.1571	201.592
	14.6	104.949	201.752	101.811	205.726	98.2774	201.784
	14.62	105.286	201.843	102.236	205.526	98.3845	201.999
	14.64	105.614	201.852	102.643	205.277	98.4788	202.219
	14.66	105.927	201.784	103.018	204.975	98.5611	202.427
	14.68	106.22	201.649	103.351	204.615	98.6332	202.608
	14.7	106.484	201.463	103.641	204.201	98.698	202.748
	14.72	106.711	201.243	103.888	203.738	98.7602	202.84
	14.74	106.89	201.01	104.097	203.236	98.8265	202.878
	14.76	107.013	200.784	104.277	202.71	98.9055	202.864
	14.78	107.07	200.584	104.437	202.176	99.0073	202.8
	14.8	107.054	200.426	104.585	201.652	99.1427	202.693
	14.82	106.959	200.321	104.727	201.157	99.3219	202.554
	14.84	106.784	200.274	104.866	200.708	99.5533	202.394
	14.86	106.53	200.283	105.004	200.322	99.8417	202.228
	14.88	106.205	200.34	105.14	200.011	100.188	202.07
	14.9	105.82	200.43	105.271	199.786	100.587	201.933
	14.92	105.388	200.535	105.394	199.657	101.028	201.829
	14.94	104.928	200.632	105.505	199.629	101.497	201.767
	14.96	104.458	200.696	105.602	199.706	101.973	201.75
	14.98	103.997	200.704	105.684	199.89	102.436	201.776
	15	103.561	200.637	105.751	200.182	102.863	201.84
	15.02	103.166	200.481	105.803	200.579	103.234	201.928
	15.04	102.821	200.229	105.84	201.079	103.531	202.023
	15.06	102.534	199.88	105.862	201.674	103.745	202.105
	15.08	102.307	199.445	105.867	202.354	103.868	202.152
	15.1	102.138	198.94	105.853	203.106	103.904	202.144
	15.12	102.025	198.389	105.817	203.914	103.858	202.062
	15.14	101.962	197.819	105.755	204.756	103.745	201.893
	15.16	101.944	197.261	105.667	205.609	103.581	201.632
	15.18	101.966	196.745	105.552	206.451	103.383	201.279
	15.2	102.021	196.302	105.414	207.254	103.169	200.846
	15.22	102.108	195.956	105.261	207.997	102.956	200.348
	15.24	102.222	195.726	105.104	208.658	102.754	199.808
	15.26	102.362	195.626	104.956	209.221	102.573	199.255
	15.28	102.524	195.661	104.834	209.674	102.417	198.714
	15.3	102.705	195.83	104.754	210.012	102.284	198.215
	15.32	102.899	196.124	104.731	210.233	102.171	197.781
	15.34	103.101	196.526	104.776	210.343	102.073	197.431
	15.36	103.303	197.016	104.895	210.35	101.984	197.177
	15.38	103.495	197.566	105.088	210.265	101.898	197.023
	15.4	103.667	198.147	105.351	210.103	101.814	196.968
	15.42	103.811	198.727	105.673	209.875	101.732	197.002
	15.44	103.917	199.275	106.04	209.594	101.657	197.111
	15.46	103.977	199.761	106.433	209.268	101.597	197.28
	15.48	103.986	200.162	106.835	208.906	101.563	197.489
	15.5	103.938	200.459	107.228	208.509	101.567	197.72
	15.52	103.832	200.644	107.595	208.081	101.624	197.959
	15.54	103.667	200.714	107.922	207.62	101.744	198.196
	15.56	103.444	200.681	108.2	207.128	101.932	198.423
	15.58	103.166	200.562	108.42	206.604	102.192	198.639
	15.6	102.839	200.382	108.577	206.053	102.515	198.849
	15.62	102.468	200.173	108.668	205.479	102.889	199.06
	15.64	102.064	199.968	108.694	204.893	103.293	199.282
	15.66	101.639	199.798	108.656	204.307	103.699	199.529
	15.68	101.206	199.69	108.557	203.735	104.077	199.812
	15.7	100.784	199.665	108.405	203.192	104.394	200.141
	15.72	100.392	199.733	108.208	202.691	104.621	200.525
	15.74	100.051	199.894	107.978	202.245	104.731	200.965
	15.76	99.7842	200.137	107.728	201.859	104.708	201.461
	15.78	99.6104	200.442	107.474	201.536	104.545	202.005
	15.8	99.5467	200.781	107.232	201.273	104.244	202.586
	15.82	99.6051	201.122	107.018	201.063	103.82	203.186
	15.84	99.7905	201.429	106.845	200.895	103.296	203.785
	15.86	100.1	201.67	106.723	200.756	102.705	204.36
	15.88	100.524	201.816	106.657	200.635	102.081	204.889
	15.9	101.042	201.847	106.647	200.522	101.461	205.349
	15.92	101.629	201.753	106.686	200.412	100.88	205.721
	15.94	102.255	201.533	106.766	200.303	100.368	205.992
	15.96	102.888	201.198	106.872	200.196	99.9457	206.154
	15.98	103.493	200.769	106.988	200.1	99.6267	206.208
	16	104.04	200.275	107.1	200.022	99.415	206.16
	16.02	104.505	199.751	107.193	199.973	99.306	206.026
	16.04	104.869	199.23	107.256	199.96	99.2879	205.829
	16.06	105.119	198.748	107.285	199.99	99.3438	205.596
	16.08	105.252	198.333	107.276	200.067	99.4541	205.356
	16.1	105.273	198.007	107.233	200.188	99.5987	205.139
	16.12	105.192	197.78	107.162	200.351	99.7594	204.973
	16.14	105.024	197.655	107.071	200.549	99.9211	204.881
	16.16	104.788	197.625	106.969	200.773	100.074	204.878
	16.18	104.505	197.674	106.867	201.017	100.212	204.974
	16.2	104.196	197.783	106.771	201.275	100.336	205.165
	16.22	103.879	197.93	106.688	201.544	100.451	205.445
	16.24	103.572	198.093	106.621	201.823	100.563	205.795
	16.26	103.288	198.253	106.572	202.117	100.682	206.195
	16.28	103.038	198.397	106.539	202.432	100.819	206.621
	16.3	102.827	198.516	106.52	202.776	100.981	207.047
	16.32	102.659	198.607	106.512	203.156	101.174	207.451
	16.34	102.532	198.668	106.509	203.58	101.403	207.814
	16.36	102.442	198.703	106.509	204.05	101.667	208.124
	16.38	102.382	198.713	106.508	204.568	101.961	208.375
	16.4	102.345	198.697	106.502	205.129	102.28	208.57
	16.42	102.32	198.654	106.489	205.723	102.614	208.716
	16.44	102.298	198.579	106.466	206.337	102.955	208.827
	16.46	102.272	198.462	106.431	206.957	103.293	208.919
	16.48	102.233	198.293	106.383	207.563	103.621	209.011
	16.5	102.178	198.063	106.321	208.137	103.932	209.119
	16.52	102.105	197.765	106.243	208.662	104.223	209.259
	16.54	102.017	197.395	106.151	209.123	104.492	209.441
	16.56	101.917	196.957	106.045	209.508	104.739	209.673
	16.58	101.814	196.462	105.928	209.807	104.965	209.953
	16.6	101.717	195.925	105.806	210.017	105.17	210.279
	16.62	101.636	195.373	105.681	210.134	105.354	210.642
	16.64	101.579	194.833	105.561	210.161	105.513	211.031
	16.66	101.556	194.337	105.451	210.101	105.646	211.433
	16.68	101.571	193.913	105.354	209.96	105.747	211.836
	16.7	101.627	193.587	105.273	209.745	105.81	212.227
	16.72	101.722	193.379	105.209	209.466	105.83	212.594
	16.74	101.852	193.296	105.159	209.131	105.803	212.929
	16.76	102.009	193.338	105.119	208.751	105.727	213.227
	16.78	102.185	193.493	105.083	208.337	105.602	213.482
	16.8	102.369	193.738	105.041	207.901	105.434	213.695
	16.82	102.552	194.043	104.987	207.454	105.231	213.866
	16.84	102.725	194.375	104.912	207.007	105.004	213.996
	16.86	102.882	194.698	104.812	206.571	104.766	214.09
	16.88	103.02	194.976	104.683	206.156	104.533	214.151
	16.9	103.137	195.181	104.527	205.77	104.319	214.182
	16.92	103.235	195.29	104.346	205.421	104.138	214.186
	16.94	103.318	195.291	104.148	205.112	104.002	214.161
	16.96	103.393	195.181	103.94	204.849	103.92	214.108
	16.98	103.465	194.966	103.734	204.632	103.899	214.022
	17	103.542	194.663	103.539	204.462	103.939	213.898
	17.02	103.63	194.296	103.366	204.339	104.041	213.728
	17.04	103.733	193.896	103.226	204.263	104.2	213.504
	17.06	103.854	193.497	103.127	204.235	104.408	213.222
	17.08	103.991	193.132	103.074	204.256	104.655	212.875
	17.1	104.143	192.834	103.074	204.33	104.931	212.464
	17.12	104.302	192.63	103.13	204.461	105.221	211.991
	17.14	104.462	192.542	103.242	204.655	105.514	211.468
	17.16	104.611	192.58	103.409	204.917	105.798	210.908
	17.18	104.742	192.744	103.63	205.251	106.061	210.33
	17.2	104.844	193.026	103.899	205.662	106.297	209.758
	17.22	104.909	193.403	104.208	206.149	106.5	209.217
	17.24	104.932	193.849	104.549	206.708	106.672	208.731
	17.26	104.911	194.327	104.909	207.329	106.813	208.322
	17.28	104.844	194.801	105.275	208	106.931	208.007
	17.3	104.735	195.235	105.632	208.7	107.031	207.796
	17.32	104.585	195.598	105.964	209.409	107.124	207.691
	17.34	104.4	195.869	106.257	210.102	107.216	207.686
	17.36	104.184	196.037	106.496	210.755	107.312	207.762
	17.38	103.939	196.103	106.67	211.345	107.413	207.895
	17.4	103.668	196.079	106.773	211.851	107.515	208.052
	17.42	103.371	195.989	106.802	212.259	107.612	208.197
	17.44	103.049	195.861	106.761	212.556	107.692	208.291
	17.46	102.702	195.73	106.657	212.739	107.74	208.297
	17.48	102.331	195.629	106.507	212.805	107.743	208.184
	17.5	101.938	195.586	106.328	212.759	107.686	207.929
	17.52	101.528	195.623	106.145	212.605	107.558	207.52
	17.54	101.111	195.752	105.985	212.351	107.354	206.961
	17.56	100.696	195.975	105.873	212.007	107.074	206.27
	17.58	100.297	196.281	105.836	211.58	106.724	205.48
	17.6	99.9296	196.655	105.897	211.078	106.318	204.635
	17.62	99.6099	197.07	106.073	210.508	105.873	203.791
	17.64	99.3525	197.499	106.376	209.876	105.41	203.007
	17.66	99.1701	197.911	106.808	209.189	104.953	202.344
	17.68	99.0714	198.277	107.363	208.451	104.524	201.856
	17.7	99.0604	198.572	108.026	207.67	104.144	201.585
	17.72	99.1353	198.775	108.773	206.852	103.83	201.559
	17.74	99.2881	198.871	109.573	206.008	103.594	201.787
	17.76	99.5054	198.853	110.387	205.149	103.444	202.256
	17.78	99.7686	198.718	111.178	204.288	103.38	202.937
	17.8	100.055	198.47	111.903	203.443	103.4	203.78
	17.82	100.341	198.117	112.528	202.631	103.495	204.726
	17.84	100.602	197.673	113.02	201.872	103.651	205.707
	17.86	100.814	197.152	113.358	201.185	103.853	206.652
	17.88	100.957	196.572	113.53	200.587	104.08	207.498
	17.9	101.018	195.952	113.536	200.094	104.311	208.192
	17.92	100.987	195.312	113.388	199.714	104.524	208.695
	17.94	100.862	194.673	113.109	199.451	104.697	208.986
	17.96	100.648	194.054	112.732	199.304	104.809	209.064
	17.98	100.354	193.474	112.295	199.262	104.844	208.944
	18	99.9944	192.952	111.842	199.309	104.789	208.659
	18.02	99.587	192.502	111.417	199.422	104.638	208.25
	18.04	99.1507	192.138	111.06	199.577	104.389	207.768
	18.06	98.7044	191.868	110.807	199.744	104.051	207.265
	18.08	98.2656	191.699	110.687	199.895	103.638	206.789
	18.1	97.8497	191.631	110.716	200.002	103.17	206.385
	18.12	97.4692	191.661	110.904	200.04	102.674	206.086
	18.14	97.1339	191.781	111.245	199.989	102.177	205.914
	18.16	96.851	191.979	111.727	199.834	101.709	205.88
	18.18	96.626	192.239	112.327	199.568	101.298	205.985
	18.2	96.4629	192.544	113.015	199.19	100.968	206.219
	18.22	96.365	192.876	113.756	198.708	100.736	206.566
	18.24	96.3356	193.214	114.515	198.136	100.616	207.006
	18.26	96.3775	193.543	115.254	197.5	100.61	207.514
	18.28	96.4935	193.848	115.939	196.828	100.716	208.067
	18.3	96.686	194.119	116.541	196.158	100.925	208.643
	18.32	96.9561	194.351	117.034	195.528	101.221	209.221
	18.34	97.3038	194.543	117.4	194.981	101.584	209.784
	18.36	97.7268	194.702	117.626	194.556	101.993	210.315
	18.38	98.2208	194.836	117.705	194.285	102.425	210.801
	18.4	98.7792	194.958	117.636	194.196	102.86	211.227
	18.42	99.3929	195.083	117.421	194.301	103.276	211.578
	18.44	100.051	195.229	117.068	194.602	103.66	211.839
	18.46	100.739	195.409	116.587	195.087	103.997	211.995
	18.48	101.443	195.637	115.99	195.728	104.281	212.031
	18.5	102.146	195.921	115.294	196.487	104.507	211.934
	18.52	102.829	196.263	114.52	197.316	104.675	211.693
	18.54	103.472	196.662	113.689	198.161	104.786	211.304
	18.56	104.054	197.107	112.827	198.968	104.846	210.771
	18.58	104.555	197.581	111.964	199.687	104.86	210.104
	18.6	104.952	198.062	111.127	200.272	104.832	209.323
	18.62	105.229	198.524	110.348	200.693	104.767	208.456
	18.64	105.368	198.937	109.653	200.928	104.67	207.538
	18.66	105.359	199.27	109.065	200.974	104.541	206.607
	18.68	105.198	199.495	108.6	200.839	104.382	205.701
	18.7	104.89	199.586	108.266	200.543	104.193	204.859
	18.72	104.445	199.526	108.059	200.12	103.972	204.113
	18.74	103.885	199.304	107.97	199.607	103.721	203.488
	18.76	103.237	198.92	107.979	199.047	103.44	203.002
	18.78	102.534	198.382	108.059	198.482	103.133	202.662
	18.8	101.811	197.711	108.181	197.952	102.808	202.467
	18.82	101.105	196.936	108.318	197.491	102.474	202.409
	18.84	100.45	196.092	108.443	197.123	102.144	202.477
	18.86	99.8754	195.221	108.537	196.865	101.834	202.655
	18.88	99.4026	194.368	108.588	196.723	101.564	202.925
	18.9	99.0462	193.576	108.592	196.695	101.351	203.272
	18.92	98.8123	192.884	108.556	196.77	101.215	203.682
	18.94	98.6989	192.327	108.488	196.93	101.17	204.142
	18.96	98.6973	191.93	108.403	197.154	101.229	204.641
	18.98	98.7932	191.71	108.316	197.419	101.397	205.171
	19	98.9686	191.671	108.239	197.7	101.674	205.723
	19.02	99.2038	191.809	108.179	197.975	102.053	206.287
	19.04	99.4787	192.112	108.137	198.227	102.518	206.853
	19.06	99.7746	192.556	108.11	198.44	103.049	207.408
	19.08	100.075	193.116	108.086	198.605	103.618	207.938
	19.1	100.368	193.761	108.052	198.719	104.196	208.43
	19.12	100.642	194.457	107.99	198.78	104.751	208.868
	19.14	100.894	195.174	107.886	198.792	105.252	209.238
	19.16	101.122	195.879	107.727	198.761	105.668	209.529
	19.18	101.328	196.547	107.508	198.692	105.977	209.731
	19.2	101.515	197.155	107.227	198.591	106.158	209.841
	19.22	101.691	197.684	106.889	198.467	106.2	209.86
	19.24	101.863	198.12	106.507	198.323	106.098	209.792
	19.26	102.037	198.456	106.096	198.164	105.855	209.646
	19.28	102.221	198.688	105.675	197.998	105.48	209.438
	19.3	102.419	198.818	105.264	197.829	104.989	209.182
	19.32	102.634	198.851	104.882	197.664	104.403	208.895
	19.34	102.869	198.797	104.546	197.514	103.748	208.596
	19.36	103.124	198.672	104.269	197.39	103.05	208.3
	19.38	103.398	198.494	104.057	197.302	102.339	208.02
	19.4	103.69	198.284	103.915	197.266	101.643	207.767
	19.42	103.997	198.065	103.84	197.291	100.99	207.548
	19.44	104.318	197.865	103.825	197.387	100.404	207.367
	19.46	104.649	197.708	103.86	197.558	99.9068	207.226
	19.48	104.986	197.62	103.933	197.803	99.5163	207.126
	19.5	105.328	197.624	104.03	198.115	99.2458	207.066
	19.52	105.668	197.737	104.137	198.48	99.1035	207.046
	19.54	106.002	197.973	104.242	198.877	99.0928	207.067
	19.56	106.323	198.337	104.336	199.284	99.2114	207.129
	19.58	106.626	198.828	104.411	199.673	99.4515	207.233
	19.6	106.903	199.435	104.465	200.02	99.8	207.381
	19.62	107.149	200.14	104.497	200.302	100.239	207.572
	19.64	107.361	200.916	104.511	200.501	100.745	207.805
	19.66	107.537	201.733	104.514	200.606	101.292	208.074
	19.68	107.678	202.552	104.513	200.616	101.852	208.373
	19.7	107.788	203.338	104.516	200.533	102.397	208.692
	19.72	107.874	204.053	104.533	200.368	102.901	209.018
	19.74	107.944	204.663	104.569	200.138	103.341	209.338
	19.76	108.006	205.14	104.63	199.862	103.7	209.637
	19.78	108.068	205.464	104.719	199.56	103.972	209.9
	19.8	108.136	205.622	104.836	199.253	104.154	210.114
	19.82	108.211	205.609	104.977	198.96	104.255	210.27
	19.84	108.289	205.431	105.139	198.695	104.291	210.361
	19.86	108.363	205.101	105.316	198.472	104.282	210.386
	19.88	108.419	204.637	105.5	198.298	104.251	210.348
	19.9	108.442	204.065	105.684	198.178	104.224	210.256
	19.92	108.413	203.41	105.861	198.114	104.221	210.124
	19.94	108.314	202.702	106.023	198.104	104.259	209.966
	19.96	108.13	201.968	106.167	198.143	104.35	209.801
	19.98	107.849	201.235	106.288	198.223	104.495	209.645
	20	107.466	200.525	106.386	198.334	104.691	209.513
	20.02	106.981	199.859	106.461	198.463	104.929	209.414
	20.04	106.401	199.251	106.515	198.594	105.195	209.352
	20.06	105.737	198.713	106.553	198.712	105.472	209.323
	20.08	105.005	198.25	106.58	198.802	105.745	209.317
	20.1	104.223	197.867	106.602	198.85	105.999	209.318
	20.12	103.412	197.561	106.626	198.845	106.222	209.305
	20.14	102.591	197.329	106.657	198.779	106.406	209.256
	20.16	101.781	197.164	106.702	198.651	106.546	209.146
	20.18	101.001	197.058	106.763	198.465	106.643	208.957
	20.2	100.269	197	106.844	198.227	106.696	208.673
	20.22	99.6048	196.979	106.945	197.95	106.709	208.284
	20.24	99.0269	196.983	107.064	197.649	106.684	207.787
	20.26	98.5547	197	107.2	197.343	106.624	207.188
	20.28	98.2073	197.02	107.346	197.048	106.528	206.498
	20.3	98.0023	197.032	107.496	196.784	106.395	205.735
	20.32	97.9544	197.031	107.643	196.567	106.22	204.919
	20.34	98.074	197.009	107.778	196.413	105.998	204.077
	20.36	98.3649	196.966	107.894	196.336	105.721	203.235
	20.38	98.8231	196.901	107.983	196.349	105.381	202.42
	20.4	99.4357	196.818	108.041	196.46	104.972	201.659
	20.42	100.181	196.721	108.061	196.675	104.489	200.978
	20.44	101.028	196.616	108.043	196.998	103.93	200.398
	20.46	101.939	196.511	107.985	197.426	103.3	199.94
	20.48	102.875	196.412	107.887	197.952	102.608	199.616
	20.5	103.79	196.323	107.751	198.562	101.868	199.436
	20.52	104.646	196.249	107.578	199.236	101.104	199.401
	20.54	105.406	196.189	107.371	199.949	100.339	199.506
	20.56	106.043	196.141	107.129	200.67	99.6057	199.74
	20.58	106.538	196.101	106.853	201.366	98.9339	200.082
	20.6	106.884	196.059	106.545	202.002	98.3551	200.508
	20.62	107.086	196.008	106.206	202.546	97.8972	200.987
	20.64	107.156	195.935	105.839	202.969	97.5834	201.487
	20.66	107.116	195.832	105.448	203.25	97.4297	201.973
	20.68	106.992	195.69	105.041	203.375	97.4441	202.413
	20.7	106.815	195.502	104.628	203.342	97.6257	202.778
	20.72	106.613	195.266	104.222	203.156	97.9653	203.044
	20.74	106.412	194.984	103.836	202.832	98.4462	203.195
	20.76	106.232	194.661	103.485	202.395	99.0452	203.222
	20.78	106.087	194.306	103.184	201.872	99.7353	203.123
	20.8	105.984	193.932	102.943	201.293	100.487	202.905
	20.82	105.923	193.553	102.77	200.691	101.269	202.578
	20.84	105.895	193.184	102.67	200.093	102.055	202.158
	20.86	105.892	192.84	102.64	199.522	102.817	201.664
	20.88	105.9	192.532	102.677	198.996	103.533	201.116
	20.9	105.906	192.271	102.77	198.524	104.184	200.533
	20.92	105.9	192.062	102.909	198.11	104.756	199.933
	20.94	105.875	191.907	103.08	197.748	105.238	199.335
	20.96	105.832	191.803	103.273	197.431	105.623	198.754
	20.98	105.774	191.746	103.476	197.145	105.906	198.202
	21	105.71	191.727	103.681	196.879	106.085	197.692
	21.02	105.655	191.737	103.884	196.618	106.16	197.234
	21.04	105.625	191.767	104.082	196.353	106.133	196.837
	21.06	105.637	191.808	104.274	196.077	106.009	196.509
	21.08	105.707	191.853	104.463	195.79	105.792	196.258
	21.1	105.847	191.898	104.647	195.494	105.493	196.09
	21.12	106.066	191.943	104.828	195.198	105.121	196.01
	21.14	106.367	191.99	105.002	194.912	104.691	196.022
	21.16	106.748	192.043	105.165	194.65	104.22	196.13
	21.18	107.2	192.108	105.308	194.426	103.728	196.335
	21.2	107.709	192.195	105.421	194.252	103.239	196.637
	21.22	108.259	192.311	105.491	194.137	102.777	197.035
	21.24	108.826	192.461	105.506	194.087	102.367	197.524
	21.26	109.387	192.65	105.454	194.101	102.034	198.096
	21.28	109.916	192.876	105.327	194.174	101.799	198.742
	21.3	110.389	193.137	105.12	194.297	101.681	199.444
	21.32	110.782	193.423	104.835	194.455	101.692	200.185
	21.34	111.074	193.722	104.481	194.631	101.839	200.941
	21.36	111.25	194.02	104.073	194.807	102.119	201.684
	21.38	111.3	194.298	103.632	194.965	102.523	202.387
	21.4	111.222	194.54	103.186	195.09	103.035	203.02
	21.42	111.02	194.728	102.765	195.169	103.631	203.553
	21.44	110.707	194.849	102.401	195.196	104.284	203.963
	21.46	110.306	194.892	102.124	195.168	104.961	204.229
	21.48	109.843	194.851	101.959	195.088	105.631	204.338
	21.5	109.351	194.729	101.924	194.962	106.259	204.288
	21.52	108.865	194.53	102.03	194.8	106.816	204.083
	21.54	108.417	194.27	102.275	194.612	107.276	203.738
	21.56	108.04	193.966	102.65	194.41	107.62	203.276
	21.58	107.757	193.642	103.135	194.2	107.832	202.727
	21.6	107.584	193.325	103.701	193.988	107.909	202.125
	21.62	107.527	193.042	104.317	193.775	107.851	201.505
	21.64	107.583	192.818	104.945	193.556	107.668	200.902
	21.66	107.736	192.676	105.552	193.328	107.375	200.347
	21.68	107.964	192.633	106.105	193.082	106.992	199.864
	21.7	108.239	192.697	106.579	192.812	106.543	199.472
	21.72	108.527	192.869	106.954	192.515	106.052	199.18
	21.74	108.795	193.14	107.22	192.188	105.544	198.988
	21.76	109.015	193.495	107.377	191.837	105.04	198.89
	21.78	109.161	193.909	107.428	191.47	104.56	198.872
	21.8	109.215	194.355	107.388	191.099	104.116	198.916
	21.82	109.17	194.803	107.274	190.74	103.718	199.002
	21.84	109.025	195.223	107.106	190.408	103.369	199.106
	21.86	108.787	195.587	106.907	190.117	103.068	199.205
	21.88	108.473	195.872	106.698	189.876	102.812	199.278
	21.9	108.101	196.062	106.499	189.693	102.595	199.304
	21.92	107.694	196.147	106.325	189.565	102.409	199.268
	21.94	107.273	196.123	106.189	189.487	102.247	199.156
	21.96	106.858	195.993	106.099	189.449	102.101	198.961
	21.98	106.465	195.768	106.058	189.439	101.965	198.68
	22	106.101	195.462	106.064	189.443	101.836	198.316
	22.02	105.773	195.094	106.112	189.451	101.707	197.878
	22.04	105.477	194.686	106.194	189.453	101.577	197.381
	22.06	105.208	194.261	106.3	189.447	101.443	196.847
	22.08	104.956	193.844	106.42	189.433	101.304	196.299
	22.1	104.713	193.46	106.54	189.417	101.16	195.766
	22.12	104.468	193.131	106.652	189.407	101.009	195.278
	22.14	104.216	192.879	106.746	189.416	100.854	194.862
	22.16	103.955	192.724	106.815	189.454	100.697	194.544
	22.18	103.688	192.681	106.856	189.531	100.54	194.343
	22.2	103.423	192.762	106.869	189.653	100.389	194.273
	22.22	103.172	192.973	106.856	189.824	100.25	194.339
	22.24	102.951	193.316	106.821	190.039	100.13	194.538
	22.26	102.774	193.787	106.772	190.291	100.037	194.859
	22.28	102.658	194.376	106.719	190.566	99.9806	195.286
	22.3	102.614	195.069	106.674	190.848	99.9709	195.797
	22.32	102.65	195.847	106.647	191.115	100.018	196.366
	22.34	102.769	196.685	106.651	191.347	100.13	196.971
	22.36	102.967	197.556	106.699	191.523	100.316	197.586
	22.38	103.236	198.432	106.801	191.623	100.582	198.193
	22.4	103.563	199.284	106.967	191.632	100.932	198.774
	22.42	103.929	200.083	107.203	191.539	101.367	199.319
	22.44	104.316	200.806	107.512	191.341	101.881	199.822
	22.46	104.705	201.431	107.894	191.041	102.466	200.279
	22.48	105.076	201.944	108.343	190.649	103.108	200.693
	22.5	105.415	202.334	108.849	190.183	103.786	201.066
	22.52	105.708	202.601	109.398	189.666	104.475	201.404
	22.54	105.948	202.746	109.972	189.125	105.146	201.713
	22.56	106.13	202.779	110.548	188.592	105.765	201.998
	22.58	106.253	202.712	111.105	188.095	106.3	202.267
	22.6	106.321	202.559	111.62	187.664	106.718	202.527
	22.62	106.337	202.337	112.072	187.321	106.989	202.787
	22.64	106.308	202.062	112.445	187.083	107.089	203.055
	22.66	106.242	201.747	112.728	186.958	107.004	203.344
	22.68	106.145	201.404	112.915	186.945	106.726	203.665
	22.7	106.023	201.041	113.009	187.035	106.259	204.031
	22.72	105.882	200.666	113.017	187.21	105.618	204.454
	22.74	105.725	200.283	112.954	187.448	104.827	204.946
	22.76	105.552	199.897	112.838	187.721	103.92	205.514
	22.78	105.364	199.511	112.688	188.002	102.936	206.159
	22.8	105.161	199.132	112.526	188.264	101.918	206.879
	22.82	104.939	198.767	112.372	188.483	100.912	207.662
	22.84	104.697	198.428	112.242	188.643	99.9608	208.486
	22.86	104.433	198.126	112.15	188.73	99.1017	209.326
	22.88	104.145	197.875	112.105	188.741	98.3674	210.145
	22.9	103.835	197.689	112.111	188.678	97.7813	210.905
	22.92	103.505	197.582	112.17	188.549	97.3581	211.563
	22.94	103.159	197.564	112.28	188.367	97.1028	212.08
	22.96	102.802	197.642	112.435	188.151	97.0113	212.417
	22.98	102.445	197.816	112.631	187.92	97.0712	212.548
	23	102.093	198.084	112.857	187.697	97.263	212.452
	23.02	101.758	198.435	113.105	187.501	97.5622	212.125
	23.04	101.445	198.855	113.365	187.355	97.9406	211.577
	23.06	101.161	199.325	113.625	187.276	98.3684	210.83
	23.08	100.909	199.824	113.873	187.276	98.8165	209.921
	23.1	100.687	200.329	114.099	187.367	99.2577	208.896
	23.12	100.494	200.82	114.29	187.553	99.6688	207.81
	23.14	100.322	201.278	114.435	187.834	100.032	206.719
	23.16	100.166	201.686	114.526	188.205	100.335	205.679
	23.18	100.018	202.035	114.554	188.658	100.572	204.741
	23.2	99.8751	202.321	114.516	189.181	100.743	203.943
	23.22	99.7364	202.544	114.409	189.759	100.857	203.316
	23.24	99.607	202.711	114.233	190.376	100.923	202.875
	23.26	99.4973	202.833	113.992	191.015	100.958	202.62
	23.28	99.4232	202.926	113.69	191.659	100.976	202.54
	23.3	99.4051	203.006	113.335	192.292	100.996	202.615
	23.32	99.4655	203.091	112.934	192.9	101.031	202.814
	23.34	99.6266	203.197	112.497	193.467	101.094	203.105
	23.36	99.9074	203.335	112.036	193.984	101.193	203.457
	23.38	100.321	203.514	111.563	194.442	101.331	203.839
	23.4	100.87	203.737	111.092	194.835	101.506	204.23
	23.42	101.55	204	110.638	195.161	101.714	204.615
	23.44	102.342	204.294	110.219	195.421	101.945	204.987
	23.46	103.219	204.605	109.852	195.619	102.186	205.347
	23.48	104.143	204.917	109.552	195.763	102.425	205.701
	23.5	105.072	205.209	109.334	195.863	102.646	206.057
	23.52	105.958	205.463	109.21	195.927	102.837	206.423
	23.54	106.756	205.657	109.184	195.965	102.985	206.803
	23.56	107.424	205.775	109.258	195.987	103.083	207.196
	23.58	107.929	205.802	109.425	195.997	103.123	207.594
	23.6	108.247	205.726	109.672	196	103.104	207.979
	23.62	108.369	205.538	109.982	195.996	103.027	208.332
	23.64	108.297	205.234	110.334	195.985	102.897	208.626
	23.66	108.045	204.813	110.706	195.965	102.724	208.834
	23.68	107.642	204.276	111.075	195.937	102.518	208.935
	23.7	107.122	203.63	111.424	195.902	102.294	208.909
	23.72	106.528	202.884	111.739	195.866	102.066	208.746
	23.74	105.905	202.054	112.011	195.836	101.851	208.446
	23.76	105.299	201.157	112.238	195.826	101.662	208.019
	23.78	104.751	200.217	112.423	195.85	101.513	207.483
	23.8	104.297	199.258	112.572	195.925	101.415	206.864
	23.82	103.964	198.309	112.693	196.069	101.375	206.194
	23.84	103.769	197.403	112.794	196.295	101.399	205.505
	23.86	103.719	196.569	112.88	196.617	101.49	204.831
	23.88	103.809	195.836	112.953	197.041	101.647	204.203
	23.9	104.026	195.233	113.013	197.569	101.867	203.648
	23.92	104.345	194.779	113.054	198.195	102.147	203.186
	23.94	104.737	194.493	113.067	198.91	102.48	202.834
	23.96	105.167	194.382	113.042	199.696	102.86	202.601
	23.98	105.601	194.45	112.969	200.533	103.278	202.492
	24	106.004	194.693	112.838	201.395	103.725	202.506
	24.02	106.345	195.099	112.644	202.255	104.19	202.638
	24.04	106.6	195.652	112.385	203.085	104.663	202.88
	24.06	106.752	196.332	112.061	203.857	105.131	203.218
	24.08	106.793	197.116	111.677	204.546	105.582	203.638
	24.1	106.724	197.977	111.244	205.127	106.004	204.12
	24.12	106.554	198.889	110.771	205.583	106.385	204.644
	24.14	106.298	199.827	110.272	205.899	106.717	205.186
	24.16	105.98	200.763	109.762	206.065	106.995	205.722
	24.18	105.625	201.672	109.256	206.079	107.214	206.228
	24.2	105.261	202.531	108.769	205.942	107.378	206.681
	24.22	104.917	203.316	108.316	205.659	107.489	207.061
	24.24	104.621	204.008	107.912	205.242	107.557	207.351
	24.26	104.395	204.59	107.572	204.704	107.591	207.539
	24.28	104.258	205.047	107.311	204.061	107.601	207.619
	24.3	104.223	205.37	107.142	203.335	107.597	207.59
	24.32	104.297	205.554	107.076	202.545	107.588	207.457
	24.34	104.478	205.603	107.122	201.715	107.579	207.231
	24.36	104.76	205.525	107.284	200.869	107.571	206.925
	24.38	105.128	205.336	107.561	200.032	107.56	206.556
	24.4	105.564	205.058	107.946	199.232	107.541	206.145
	24.42	106.044	204.719	108.426	198.494	107.502	205.712
	24.44	106.545	204.349	108.979	197.843	107.432	205.28
	24.46	107.04	203.98	109.582	197.303	107.318	204.869
	24.48	107.507	203.645	110.205	196.895	107.149	204.501
	24.5	107.925	203.37	110.816	196.633	106.915	204.193
	24.52	108.277	203.176	111.385	196.528	106.614	203.962
	24.54	108.551	203.078	111.885	196.581	106.246	203.818
	24.56	108.741	203.079	112.292	196.786	105.82	203.768
	24.58	108.845	203.175	112.592	197.129	105.348	203.812
	24.6	108.863	203.351	112.777	197.586	104.852	203.944
	24.62	108.801	203.587	112.848	198.13	104.354	204.152
	24.64	108.665	203.858	112.813	198.728	103.885	204.416
	24.66	108.464	204.135	112.688	199.348	103.47	204.713
	24.68	108.205	204.393	112.493	199.958	103.139	205.015
	24.7	107.901	204.61	112.25	200.532	102.915	205.294
	24.72	107.563	204.768	111.982	201.051	102.816	205.522
	24.74	107.202	204.861	111.712	201.508	102.854	205.675
	24.76	106.833	204.886	111.46	201.903	103.033	205.733
	24.78	106.47	204.85	111.24	202.246	103.35	205.686
	24.8	106.13	204.768	111.065	202.556	103.793	205.531
	24.82	105.826	204.655	110.941	202.855	104.345	205.273
	24.84	105.574	204.531	110.873	203.166	104.985	204.925
	24.86	105.387	204.415	110.861	203.509	105.687	204.508
	24.88	105.274	204.322	110.903	203.897	106.426	204.048
	24.9	105.24	204.264	110.996	204.333	107.177	203.574
	24.92	105.288	204.249	111.134	204.81	107.914	203.118
	24.94	105.416	204.278	111.314	205.31	108.618	202.709
	24.96	105.616	204.349	111.531	205.806	109.269	202.372
	24.98	105.88	204.455	111.777	206.264	109.851	202.129
	25	106.193	204.588	112.049	206.651	110.351	201.993
	25.02	106.54	204.738	112.339	206.934	110.759	201.97
	25.04	106.906	204.898	112.64	207.086	111.066	202.057
	25.06	107.272	205.06	112.947	207.093	111.266	202.242
	25.08	107.62	205.221	113.251	206.951	111.356	202.505
	25.1	107.932	205.378	113.545	206.671	111.336	202.82
	25.12	108.192	205.53	113.824	206.275	111.208	203.156
	25.14	108.384	205.68	114.081	205.793	110.978	203.48
	25.16	108.495	205.829	114.311	205.266	110.656	203.761
	25.18	108.514	205.979	114.51	204.732	110.254	203.971
	25.2	108.437	206.128	114.678	204.232	109.788	204.086
	25.22	108.264	206.277	114.812	203.798	109.274	204.093
	25.24	108.002	206.422	114.915	203.457	108.731	203.987
	25.26	107.665	206.562	114.987	203.226	108.179	203.776
	25.28	107.275	206.693	115.033	203.11	107.635	203.475
	25.3	106.859	206.813	115.057	203.108	107.116	203.111
	25.32	106.45	206.923	115.062	203.21	106.638	202.717
	25.34	106.08	207.023	115.055	203.4	106.214	202.334
	25.36	105.785	207.12	115.041	203.66	105.852	202.002
	25.38	105.594	207.219	115.022	203.968	105.562	201.763
	25.4	105.53	207.33	115.005	204.305	105.346	201.653
	25.42	105.608	207.46	114.989	204.651	105.208	201.702
	25.44	105.834	207.618	114.975	204.989	105.147	201.928
	25.46	106.2	207.808	114.962	205.305	105.16	202.338
	25.48	106.691	208.032	114.945	205.584	105.244	202.924
	25.5	107.282	208.288	114.918	205.818	105.391	203.664
	25.52	107.941	208.568	114.872	205.995	105.593	204.524
	25.54	108.633	208.861	114.801	206.11	105.84	205.457
	25.56	109.325	209.152	114.693	206.156	106.123	206.407
	25.58	109.985	209.422	114.543	206.128	106.428	207.317
	25.6	110.586	209.65	114.343	206.023	106.743	208.127
	25.62	111.11	209.819	114.089	205.84	107.056	208.784
	25.64	111.546	209.909	113.782	205.578	107.353	209.245
	25.66	111.892	209.904	113.423	205.242	107.621	209.481
	25.68	112.155	209.794	113.02	204.834	107.848	209.482
	25.7	112.346	209.57	112.583	204.362	108.021	209.255
	25.72	112.484	209.231	112.126	203.834	108.129	208.825
	25.74	112.589	208.778	111.664	203.262	108.163	208.235
	25.76	112.683	208.221	111.214	202.659	108.116	207.54
	25.78	112.786	207.573	110.794	202.039	107.983	206.805
	25.8	112.915	206.852	110.421	201.417	107.766	206.094
	25.82	113.087	206.082	110.108	200.81	107.468	205.471
	25.84	113.31	205.292	109.868	200.235	107.098	204.99
	25.86	113.591	204.515	109.706	199.706	106.672	204.692
	25.88	113.928	203.785	109.624	199.238	106.206	204.6
	25.9	114.317	203.141	109.617	198.843	105.724	204.721
	25.92	114.75	202.619	109.678	198.533	105.247	205.041
	25.94	115.212	202.254	109.791	198.315	104.8	205.532
	25.96	115.689	202.074	109.941	198.193	104.405	206.152
	25.98	116.161	202.103	110.108	198.171	104.08	206.85
	26	116.61	202.351	110.273	198.247	103.837	207.569
	26.02	117.017	202.816	110.419	198.417	103.683	208.254
	26.04	117.364	203.485	110.531	198.672	103.617	208.853
	26.06	117.633	204.331	110.598	199.001	103.632	209.322
	26.08	117.814	205.314	110.614	199.385	103.714	209.627
	26.1	117.897	206.384	110.578	199.806	103.848	209.746
	26.12	117.877	207.486	110.49	200.237	104.013	209.668
	26.14	117.756	208.56	110.358	200.652	104.189	209.397
	26.16	117.538	209.551	110.189	201.02	104.359	208.944
	26.18	117.233	210.406	109.992	201.314	104.51	208.332
	26.2	116.851	211.083	109.777	201.507	104.633	207.59
	26.22	116.408	211.551	109.55	201.577	104.725	206.753
	26.24	115.918	211.79	109.319	201.509	104.788	205.858
	26.26	115.397	211.797	109.089	201.298	104.831	204.944
	26.28	114.86	211.577	108.864	200.948	104.864	204.049
	26.3	114.321	211.15	108.645	200.472	104.903	203.209
	26.32	113.793	210.542	108.436	199.895	104.961	202.455
	26.34	113.286	209.787	108.238	199.248	105.054	201.813
	26.36	112.812	208.922	108.055	198.567	105.191	201.3
	26.38	112.381	207.985	107.891	197.891	105.381	200.93
	26.4	112.003	207.014	107.752	197.257	105.627	200.704
	26.42	111.687	206.045	107.643	196.696	105.925	200.619
	26.44	111.441	205.111	107.573	196.237	106.268	200.665
	26.46	111.273	204.238	107.547	195.895	106.643	200.825
	26.48	111.187	203.449	107.574	195.678	107.032	201.079
	26.5	111.184	202.76	107.658	195.586	107.416	201.407
	26.52	111.261	202.181	107.801	195.609	107.774	201.789
	26.54	111.41	201.713	108.004	195.733	108.087	202.207
	26.56	111.617	201.353	108.262	195.939	108.338	202.648
	26.58	111.866	201.091	108.566	196.209	108.515	203.105
	26.6	112.135	200.911	108.905	196.522	108.61	203.576
	26.62	112.401	200.794	109.263	196.863	108.624	204.064
	26.64	112.642	200.717	109.62	197.216	108.56	204.578
	26.66	112.839	200.656	109.955	197.572	108.432	205.127
	26.68	112.975	200.59	110.247	197.92	108.253	205.722
	26.7	113.04	200.5	110.473	198.253	108.043	206.373
	26.72	113.032	200.371	110.618	198.562	107.82	207.084
	26.74	112.954	200.195	110.668	198.84	107.602	207.856
	26.76	112.817	199.969	110.618	199.077	107.407	208.683
	26.78	112.639	199.698	110.47	199.264	107.245	209.553
	26.8	112.439	199.389	110.237	199.392	107.126	210.446
	26.82	112.242	199.054	109.939	199.453	107.053	211.34
	26.84	112.071	198.704	109.604	199.442	107.028	212.208
	26.86	111.949	198.353	109.266	199.356	107.048	213.024
	26.88	111.893	198.009	108.962	199.199	107.107	213.763
	26.9	111.918	197.68	108.728	198.978	107.2	214.401
	26.92	112.031	197.368	108.598	198.708	107.322	214.923
	26.94	112.233	197.073	108.596	198.404	107.468	215.319
	26.96	112.518	196.79	108.741	198.086	107.636	215.587
	26.98	112.876	196.517	109.037	197.774	107.823	215.732
	27	113.288	196.247	109.476	197.487	108.03	215.767
	27.02	113.735	195.978	110.039	197.241	108.26	215.71
	27.04	114.192	195.71	110.698	197.045	108.515	215.581
	27.06	114.636	195.446	111.412	196.905	108.799	215.402
	27.08	115.045	195.193	112.14	196.817	109.115	215.194
	27.1	115.398	194.961	112.834	196.776	109.462	214.975
	27.12	115.681	194.759	113.449	196.768	109.84	214.76
	27.14	115.885	194.601	113.946	196.778	110.246	214.556
	27.16	116.006	194.494	114.29	196.788	110.672	214.369
	27.18	116.049	194.444	114.458	196.782	111.112	214.197
	27.2	116.024	194.453	114.437	196.747	111.555	214.037
	27.22	115.945	194.516	114.227	196.673	111.991	213.885
	27.24	115.829	194.624	113.84	196.556	112.41	213.734
	27.26	115.694	194.762	113.299	196.394	112.803	213.584
	27.28	115.559	194.914	112.638	196.193	113.161	213.432
	27.3	115.436	195.063	111.897	195.958	113.48	213.282
	27.32	115.335	195.192	111.123	195.697	113.755	213.14
	27.34	115.258	195.289	110.362	195.418	113.983	213.016
	27.36	115.203	195.346	109.661	195.126	114.164	212.921
	27.38	115.161	195.362	109.058	194.824	114.294	212.866
	27.4	115.117	195.345	108.586	194.514	114.372	212.86
	27.42	115.057	195.304	108.265	194.191	114.396	212.91
	27.44	114.965	195.256	108.106	193.853	114.361	213.017
	27.46	114.826	195.221	108.103	193.493	114.263	213.179
	27.48	114.632	195.215	108.241	193.11	114.096	213.386
	27.5	114.377	195.257	108.495	192.702	113.855	213.625
	27.52	114.065	195.358	108.829	192.273	113.539	213.876
	27.54	113.702	195.523	109.203	191.833	113.146	214.118
	27.56	113.304	195.75	109.576	191.397	112.679	214.332
	27.58	112.888	196.031	109.908	190.983	112.145	214.498
	27.6	112.473	196.35	110.161	190.617	111.557	214.6
	27.62	112.078	196.685	110.309	190.322	110.931	214.629
	27.64	111.721	197.011	110.331	190.126	110.287	214.582
	27.66	111.416	197.304	110.22	190.049	109.647	214.463
	27.68	111.171	197.538	109.979	190.111	109.032	214.281
	27.7	110.988	197.692	109.619	190.32	108.465	214.049
	27.72	110.866	197.749	109.166	190.677	107.963	213.785
	27.74	110.797	197.699	108.649	191.172	107.539	213.506
	27.76	110.769	197.539	108.103	191.786	107.2	213.227
	27.78	110.767	197.272	107.567	192.488	106.946	212.959
	27.8	110.776	196.908	107.077	193.241	106.771	212.709
	27.82	110.78	196.462	106.668	194.003	106.663	212.479
	27.84	110.765	195.956	106.367	194.731	106.606	212.265
	27.86	110.717	195.411	106.192	195.385	106.581	212.059
	27.88	110.629	194.851	106.154	195.928	106.568	211.852
	27.9	110.496	194.3	106.251	196.336	106.549	211.633
	27.92	110.315	193.781	106.473	196.596	106.505	211.395
	27.94	110.092	193.314	106.799	196.709	106.424	211.133
	27.96	109.833	192.915	107.201	196.691	106.296	210.845
	27.98	109.55	192.596	107.647	196.571	106.117	210.537
	28	109.257	192.366	108.101	196.389	105.886	210.216
	28.02	108.971	192.227	108.529	196.196	105.607	209.894
	28.04	108.708	192.178	108.899	196.042	105.291	209.584
	28.06	108.485	192.212	109.187	195.98	104.948	209.298
	28.08	108.316	192.321	109.376	196.056	104.595	209.047
	28.1	108.213	192.491	109.458	196.304	104.249	208.836
	28.12	108.183	192.707	109.434	196.744	103.931	208.665
	28.14	108.23	192.952	109.315	197.381	103.659	208.529
	28.16	108.351	193.21	109.119	198.2	103.452	208.415
	28.18	108.54	193.465	108.869	199.17	103.323	208.309
	28.2	108.787	193.702	108.591	200.244	103.285	208.191
	28.22	109.077	193.91	108.31	201.364	103.344	208.042
	28.24	109.395	194.081	108.052	202.47	103.499	207.843
	28.26	109.723	194.209	107.835	203.497	103.745	207.58
	28.28	110.046	194.292	107.672	204.39	104.069	207.244
	28.3	110.346	194.332	107.57	205.102	104.454	206.833
	28.32	110.61	194.331	107.528	205.603	104.881	206.354
	28.34	110.827	194.295	107.54	205.881	105.325	205.819
	28.36	110.987	194.229	107.596	205.94	105.765	205.249
	28.38	111.083	194.139	107.681	205.803	106.177	204.669
	28.4	111.112	194.03	107.781	205.503	106.542	204.104
	28.42	111.073	193.904	107.881	205.086	106.845	203.582
	28.44	110.965	193.766	107.97	204.6	107.073	203.126
	28.46	110.792	193.615	108.036	204.094	107.22	202.754
	28.48	110.56	193.453	108.074	203.609	107.282	202.48
	28.5	110.276	193.281	108.077	203.18	107.262	202.305
	28.52	109.952	193.101	108.043	202.832	107.164	202.228
	28.54	109.598	192.917	107.97	202.577	106.998	202.235
	28.56	109.23	192.732	107.856	202.417	106.773	202.311
	28.58	108.861	192.555	107.702	202.347	106.504	202.434
	28.6	108.506	192.392	107.508	202.353	106.204	202.58
	28.62	108.179	192.251	107.276	202.422	105.888	202.726
	28.64	107.893	192.139	107.008	202.538	105.572	202.853
	28.66	107.656	192.061	106.713	202.688	105.268	202.941
	28.68	107.475	192.019	106.4	202.861	104.992	202.98
	28.7	107.351	192.014	106.081	203.054	104.753	202.963
	28.72	107.283	192.04	105.774	203.266	104.56	202.89
	28.74	107.266	192.092	105.496	203.5	104.42	202.767
	28.76	107.29	192.16	105.265	203.763	104.334	202.604
	28.78	107.342	192.236	105.099	204.059	104.3	202.417
	28.8	107.41	192.312	105.009	204.393	104.314	202.224
	28.82	107.476	192.382	105.005	204.764	104.367	202.044
	28.84	107.525	192.442	105.088	205.166	104.447	201.897
	28.86	107.543	192.495	105.254	205.588	104.543	201.801
	28.88	107.517	192.543	105.492	206.009	104.64	201.774
	28.9	107.436	192.593	105.786	206.407	104.726	201.828
	28.92	107.296	192.652	106.117	206.752	104.79	201.973
	28.94	107.095	192.728	106.461	207.016	104.823	202.214
	28.96	106.836	192.824	106.797	207.173	104.822	202.551
	28.98	106.53	192.942	107.103	207.2	104.785	202.981
	29	106.187	193.078	107.361	207.085	104.715	203.494
	29.02	105.823	193.223	107.556	206.822	104.619	204.079
	29.04	105.456	193.366	107.677	206.417	104.505	204.721
	29.06	105.1	193.491	107.72	205.887	104.38	205.403
	29.08	104.771	193.582	107.683	205.255	104.252	206.103
	29.1	104.481	193.626	107.57	204.548	104.125	206.8
	29.12	104.239	193.609	107.39	203.796	104	207.472
	29.14	104.048	193.527	107.155	203.027	103.875	208.097
	29.16	103.91	193.377	106.877	202.265	103.743	208.652
	29.18	103.823	193.168	106.574	201.524	103.595	209.117
	29.2	103.784	192.91	106.263	200.814	103.422	209.474
	29.22	103.79	192.623	105.96	200.135	103.215	209.712
	29.24	103.837	192.327	105.679	199.484	102.969	209.82
	29.26	103.924	192.046	105.434	198.85	102.683	209.796
	29.28	104.051	191.803	105.231	198.226	102.364	209.643
	29.3	104.22	191.617	105.077	197.603	102.02	209.373
	29.32	104.433	191.503	104.97	196.977	101.67	209.001
	29.34	104.689	191.469	104.906	196.348	101.331	208.55
	29.36	104.99	191.518	104.875	195.722	101.024	208.046
	29.38	105.332	191.642	104.865	195.11	100.768	207.519
	29.4	105.707	191.829	104.862	194.526	100.578	206.998
	29.42	106.105	192.058	104.851	193.987	100.465	206.513
	29.44	106.513	192.306	104.818	193.508	100.43	206.089
	29.46	106.913	192.547	104.749	193.106	100.471	205.745
	29.48	107.288	192.757	104.636	192.793	100.579	205.496
	29.5	107.621	192.913	104.474	192.579	100.739	205.346
	29.52	107.899	192.999	104.264	192.471	100.937	205.295
	29.54	108.108	193.005	104.01	192.473	101.156	205.335
	29.56	108.245	192.931	103.724	192.582	101.385	205.451
	29.58	108.306	192.783	103.417	192.794	101.613	205.625
	29.6	108.295	192.574	103.108	193.101	101.836	205.835
	29.62	108.221	192.324	102.812	193.488	102.055	206.06
	29.64	108.094	192.056	102.547	193.937	102.274	206.278
	29.66	107.927	191.795	102.329	194.426	102.503	206.472
	29.68	107.734	191.563	102.17	194.928	102.751	206.626
	29.7	107.527	191.379	102.078	195.412	103.028	206.73
	29.72	107.319	191.257	102.058	195.848	103.341	206.778
	29.74	107.116	191.205	102.11	196.207	103.697	206.77
	29.76	106.927	191.224	102.23	196.465	104.098	206.709
	29.78	106.755	191.311	102.409	196.605	104.542	206.6
	29.8	106.601	191.459	102.636	196.62	105.024	206.455
	29.82	106.468	191.655	102.896	196.515	105.538	206.285
	29.84	106.353	191.888	103.176	196.308	106.076	206.105
	29.86	106.257	192.145	103.457	196.028	106.63	205.929
	29.88	106.179	192.415	103.725	195.711	107.194	205.773
	29.9	106.12	192.687	103.962	195.402	107.763	205.65
	29.92	106.079	192.952	104.155	195.145	108.333	205.576
	29.94	106.059	193.203	104.293	194.984	108.9	205.56
	29.96	106.058	193.434	104.367	194.955	109.464	205.611
	29.98	106.078	193.638	104.372	195.081	110.021	205.734
	30	106.118	193.81	104.31	195.375	110.566	205.93
	30.02	106.175	193.945	104.185	195.834	111.091	206.193
	30.04	106.248	194.038	104.008	196.444	111.588	206.517
	30.06	106.33	194.083	103.795	197.174	112.045	206.889
	30.08	106.415	194.077	103.565	197.987	112.447	207.294
	30.1	106.496	194.019	103.339	198.838	112.784	207.715
	30.12	106.566	193.909	103.142	199.681	113.044	208.134
	30.14	106.615	193.748	102.994	200.468	113.219	208.532
	30.16	106.637	193.542	102.916	201.157	113.306	208.892
	30.18	106.626	193.297	102.923	201.712	113.307	209.199
	30.2	106.576	193.022	103.023	202.106	113.229	209.442
	30.22	106.484	192.725	103.22	202.319	113.081	209.61
	30.24	106.35	192.416	103.509	202.345	112.878	209.698
	30.26	106.175	192.104	103.881	202.184	112.634	209.703
	30.28	105.962	191.798	104.32	201.847	112.362	209.627
	30.3	105.716	191.504	104.807	201.354	112.076	209.474
	30.32	105.443	191.23	105.321	200.731	111.786	209.253
	30.34	105.152	190.98	105.841	200.008	111.501	208.976
	30.36	104.849	190.76	106.348	199.222	111.227	208.659
	30.38	104.543	190.574	106.824	198.409	110.97	208.321
	30.4	104.239	190.425	107.256	197.605	110.734	207.984
	30.42	103.945	190.318	107.636	196.846	110.523	207.672
	30.44	103.661	190.256	107.959	196.162	110.344	207.408
	30.46	103.39	190.241	108.225	195.578	110.2	207.215
	30.48	103.129	190.277	108.438	195.111	110.095	207.114
	30.5	102.875	190.364	108.605	194.773	110.031	207.12
	30.52	102.623	190.501	108.733	194.568	110.008	207.245
	30.54	102.366	190.685	108.832	194.492	110.022	207.492
	30.56	102.101	190.913	108.911	194.537	110.062	207.857
	30.58	101.823	191.178	108.975	194.69	110.117	208.329
	30.6	101.532	191.473	109.03	194.935	110.172	208.891
	30.62	101.231	191.788	109.076	195.256	110.21	209.52
	30.64	100.924	192.113	109.111	195.637	110.214	210.189
	30.66	100.619	192.437	109.129	196.062	110.17	210.869
	30.68	100.326	192.748	109.12	196.518	110.068	211.53
	30.7	100.054	193.035	109.074	196.994	109.904	212.143
	30.72	99.8128	193.287	108.98	197.482	109.68	212.681
	30.74	99.6094	193.492	108.826	197.973	109.403	213.124
	30.76	99.4485	193.643	108.607	198.462	109.085	213.452
	30.78	99.3326	193.729	108.32	198.946	108.744	213.654
	30.8	99.2618	193.747	107.97	199.421	108.399	213.722
	30.82	99.2348	193.691	107.566	199.883	108.066	213.654
	30.84	99.2502	193.562	107.125	200.331	107.764	213.452
	30.86	99.3073	193.362	106.668	200.759	107.504	213.124
	30.88	99.4069	193.096	106.22	201.166	107.295	212.68
	30.9	99.5519	192.776	105.806	201.546	107.141	212.133
	30.92	99.7467	192.413	105.451	201.892	107.038	211.499
	30.94	99.9969	192.026	105.175	202.197	106.983	210.795
	30.96	100.307	191.634	104.994	202.45	106.965	210.041
	30.98	100.681	191.258	104.916	202.642	106.972	209.255
	31	101.119	190.919	104.942	202.76	106.993	208.455
	31.02	101.614	190.637	105.066	202.793	107.014	207.659
	31.04	102.155	190.429	105.276	202.728	107.024	206.883
	31.06	102.727	190.306	105.555	202.558	107.012	206.14
	31.08	103.306	190.274	105.885	202.276	106.97	205.44
	31.1	103.866	190.331	106.245	201.881	106.894	204.786
	31.12	104.378	190.466	106.615	201.377	106.78	204.181
	31.14	104.812	190.664	106.978	200.771	106.628	203.621
	31.16	105.142	190.9	107.32	200.078	106.442	203.096
	31.18	105.345	191.147	107.63	199.315	106.229	202.597
	31.2	105.406	191.378	107.903	198.503	105.996	202.11
	31.22	105.317	191.565	108.136	197.666	105.756	201.621
	31.24	105.08	191.687	108.33	196.828	105.522	201.119
	31.26	104.704	191.729	108.49	196.011	105.311	200.597
	31.28	104.211	191.685	108.621	195.236	105.139	200.05
	31.3	103.624	191.557	108.73	194.519	105.02	199.481
	31.32	102.976	191.358	108.825	193.874	104.97	198.897
	31.34	102.299	191.109	108.914	193.309	104.999	198.311
	31.36	101.629	190.834	109.003	192.828	105.114	197.738
	31.38	100.996	190.561	109.097	192.433	105.319	197.195
	31.4	100.428	190.318	109.201	192.122	105.61	196.7
	31.42	99.9462	190.129	109.316	191.893	105.978	196.267
	31.44	99.5652	190.013	109.446	191.744	106.409	195.906
	31.46	99.293	189.982	109.589	191.673	106.885	195.624
	31.48	99.1314	190.041	109.745	191.678	107.385	195.423
	31.5	99.0772	190.187	109.911	191.76	107.885	195.301
	31.52	99.1239	190.413	110.085	191.922	108.363	195.252
	31.54	99.2629	190.707	110.261	192.164	108.796	195.268
	31.56	99.4851	191.054	110.433	192.488	109.165	195.342
	31.58	99.7818	191.439	110.592	192.895	109.454	195.468
	31.6	100.145	191.846	110.729	193.383	109.652	195.641
	31.62	100.567	192.261	110.832	193.948	109.752	195.857
	31.64	101.039	192.674	110.888	194.581	109.753	196.118
	31.66	101.554	193.073	110.887	195.274	109.656	196.425
	31.68	102.1	193.451	110.815	196.013	109.47	196.78
	31.7	102.664	193.801	110.666	196.783	109.205	197.184
	31.72	103.228	194.117	110.432	197.569	108.877	197.637
	31.74	103.774	194.394	110.115	198.353	108.504	198.136
	31.76	104.28	194.629	109.718	199.12	108.105	198.674
	31.78	104.726	194.82	109.252	199.854	107.702	199.242
	31.8	105.092	194.966	108.731	200.537	107.315	199.826
	31.82	105.362	195.071	108.174	201.155	106.964	200.412
	31.84	105.526	195.138	107.605	201.693	106.665	200.982
	31.86	105.579	195.177	107.045	202.136	106.43	201.521
	31.88	105.525	195.198	106.518	202.469	106.266	202.016
	31.9	105.375	195.215	106.044	202.679	106.175	202.456
	31.92	105.144	195.244	105.641	202.755	106.152	202.834
	31.94	104.854	195.302	105.32	202.686	106.189	203.148
	31.96	104.53	195.403	105.088	202.47	106.272	203.401
	31.98	104.195	195.561	104.945	202.106	106.385	203.597
	32	103.871	195.786	104.884	201.602	106.514	203.744
	32.02	103.578	196.084	104.895	200.975	106.641	203.85
	32.04	103.328	196.454	104.961	200.247	106.755	203.923
	32.06	103.128	196.89	105.062	199.449	106.845	203.972
	32.08	102.978	197.383	105.176	198.616	106.905	204
	32.1	102.874	197.917	105.283	197.787	106.931	204.01
	32.12	102.807	198.474	105.361	197.002	106.924	204.004
	32.14	102.765	199.034	105.393	196.297	106.886	203.979
	32.16	102.736	199.577	105.368	195.704	106.818	203.935
	32.18	102.71	200.085	105.277	195.245	106.725	203.868
	32.2	102.679	200.541	105.119	194.933	106.608	203.775
	32.22	102.64	200.934	104.896	194.772	106.469	203.656
	32.24	102.593	201.257	104.618	194.754	106.309	203.508
	32.26	102.544	201.506	104.295	194.862	106.127	203.331
	32.28	102.502	201.684	103.944	195.073	105.925	203.125
	32.3	102.476	201.799	103.578	195.358	105.704	202.891
	32.32	102.479	201.861	103.215	195.688	105.468	202.628
	32.34	102.523	201.883	102.869	196.032	105.222	202.338
	32.36	102.616	201.88	102.553	196.362	104.974	202.022
	32.38	102.764	201.865	102.277	196.656	104.733	201.683
	32.4	102.969	201.851	102.047	196.895	104.51	201.324
	32.42	103.229	201.848	101.871	197.067	104.313	200.951
	32.44	103.536	201.861	101.749	197.164	104.154	200.574
	32.46	103.878	201.892	101.683	197.185	104.038	200.203
	32.48	104.239	201.938	101.671	197.132	103.968	199.853
	32.5	104.601	201.992	101.712	197.014	103.943	199.539
	32.52	104.943	202.045	101.803	196.842	103.96	199.276
	32.54	105.246	202.085	101.939	196.63	104.009	199.081
	32.56	105.489	202.104	102.119	196.396	104.079	198.965
	32.58	105.658	202.092	102.337	196.157	104.156	198.937
	32.6	105.742	202.046	102.59	195.933	104.229	198.998
	32.62	105.735	201.965	102.873	195.743	104.284	199.146
	32.64	105.638	201.855	103.181	195.601	104.314	199.37
	32.66	105.459	201.725	103.505	195.523	104.314	199.656
	32.68	105.21	201.59	103.839	195.518	104.283	199.984
	32.7	104.91	201.463	104.173	195.59	104.224	200.332
	32.72	104.58	201.361	104.494	195.739	104.147	200.679
	32.74	104.241	201.298	104.791	195.96	104.063	201.009
	32.76	103.914	201.284	105.052	196.244	103.983	201.306
	32.78	103.618	201.325	105.264	196.579	103.922	201.565
	32.8	103.367	201.424	105.418	196.952	103.891	201.787
	32.82	103.171	201.578	105.509	197.347	103.9	201.98
	32.84	103.035	201.781	105.534	197.75	103.953	202.159
	32.86	102.959	202.026	105.497	198.148	104.055	202.343
	32.88	102.94	202.302	105.406	198.531	104.202	202.556
	32.9	102.974	202.6	105.275	198.888	104.388	202.818
	32.92	103.054	202.911	105.12	199.211	104.606	203.15
	32.94	103.175	203.228	104.958	199.493	104.844	203.565
	32.96	103.331	203.545	104.806	199.727	105.088	204.072
	32.98	103.517	203.859	104.681	199.906	105.327	204.67
	33	103.73	204.165	104.593	200.025	105.547	205.352
	33.02	103.967	204.464	104.547	200.08	105.737	206.101
	33.04	104.225	204.754	104.543	200.069	105.886	206.897
	33.06	104.501	205.036	104.577	199.992	105.987	207.714
	33.08	104.79	205.311	104.639	199.854	106.034	208.524
	33.1	105.087	205.578	104.716	199.664	106.023	209.303
	33.12	105.386	205.84	104.795	199.438	105.954	210.026
	33.14	105.678	206.098	104.863	199.194	105.828	210.674
	33.16	105.954	206.352	104.908	198.953	105.65	211.237
	33.18	106.206	206.604	104.922	198.738	105.424	211.706
	33.2	106.425	206.853	104.902	198.57	105.16	212.084
	33.22	106.602	207.098	104.846	198.467	104.866	212.376
	33.24	106.73	207.338	104.758	198.44	104.556	212.593
	33.26	106.804	207.568	104.642	198.492	104.24	212.75
	33.28	106.818	207.783	104.507	198.619	103.932	212.86
	33.3	106.769	207.979	104.361	198.805	103.645	212.938
	33.32	106.657	208.148	104.212	199.029	103.391	212.993
	33.34	106.48	208.283	104.071	199.264	103.181	213.034
	33.36	106.241	208.377	103.943	199.477	103.023	213.061
	33.38	105.942	208.423	103.835	199.639	102.924	213.072
	33.4	105.589	208.415	103.751	199.722	102.886	213.058
	33.42	105.189	208.348	103.69	199.705	102.909	213.009
	33.44	104.749	208.217	103.652	199.579	102.99	212.912
	33.46	104.281	208.02	103.632	199.343	103.123	212.755
	33.48	103.796	207.756	103.623	199.01	103.299	212.526
	33.5	103.307	207.429	103.616	198.602	103.508	212.222
	33.52	102.828	207.04	103.602	198.153	103.739	211.844
	33.54	102.375	206.598	103.571	197.702	103.981	211.399
	33.56	101.962	206.112	103.513	197.292	104.222	210.906
	33.58	101.606	205.594	103.422	196.964	104.454	210.387
	33.6	101.322	205.059	103.294	196.753	104.668	209.872
	33.62	101.123	204.521	103.129	196.687	104.858	209.396
	33.64	101.022	204	102.93	196.779	105.022	208.989
	33.66	101.03	203.512	102.704	197.031	105.157	208.684
	33.68	101.152	203.073	102.464	197.429	105.265	208.504
	33.7	101.392	202.698	102.22	197.947	105.351	208.464
	33.72	101.749	202.398	101.988	198.546	105.42	208.565
	33.74	102.214	202.182	101.782	199.182	105.48	208.799
	33.76	102.773	202.053	101.613	199.807	105.54	209.143
	33.78	103.408	202.009	101.49	200.376	105.607	209.561
	33.8	104.093	202.043	101.419	200.848	105.686	210.012
	33.82	104.798	202.146	101.399	201.193	105.782	210.448
	33.84	105.492	202.301	101.426	201.394	105.895	210.818
	33.86	106.141	202.49	101.49	201.445	106.019	211.079
	33.88	106.713	202.694	101.577	201.352	106.147	211.194
	33.9	107.18	202.892	101.672	201.134	106.268	211.137
	33.92	107.52	203.066	101.757	200.816	106.367	210.897
	33.94	107.717	203.199	101.816	200.428	106.428	210.481
	33.96	107.766	203.279	101.833	200	106.439	209.908
	33.98	107.67	203.299	101.8	199.561	106.388	209.213
	34	107.44	203.257	101.71	199.132	106.267	208.442
	34.02	107.099	203.155	101.563	198.732	106.077	207.645
	34.04	106.672	202.999	101.364	198.369	105.821	206.878
	34.06	106.191	202.8	101.121	198.048	105.51	206.193
	34.08	105.689	202.568	100.846	197.767	105.162	205.634
	34.1	105.196	202.315	100.553	197.523	104.794	205.238
	34.12	104.74	202.053	100.256	197.31	104.43	205.028
	34.14	104.341	201.79	99.9662	197.123	104.09	205.013
	34.16	104.013	201.536	99.6955	196.958	103.793	205.187
	34.18	103.761	201.298	99.4512	196.813	103.554	205.535
	34.2	103.58	201.081	99.2392	196.686	103.384	206.028
	34.22	103.461	200.892	99.0631	196.578	103.284	206.631
	34.24	103.386	200.735	98.9258	196.487	103.253	207.306
	34.26	103.338	200.615	98.83	196.414	103.282	208.013
	34.28	103.298	200.537	98.7792	196.354	103.358	208.715
	34.3	103.247	200.503	98.7784	196.306	103.463	209.382
	34.32	103.175	200.515	98.8336	196.262	103.578	209.991
	34.34	103.072	200.57	98.9516	196.219	103.683	210.529
	34.36	102.939	200.663	99.139	196.171	103.761	210.992
	34.38	102.78	200.783	99.4012	196.115	103.794	211.385
	34.4	102.607	200.919	99.7406	196.049	103.77	211.722
	34.42	102.434	201.054	100.156	195.971	103.679	212.02
	34.44	102.279	201.173	100.64	195.881	103.518	212.3
	34.46	102.16	201.262	101.181	195.779	103.287	212.581
	34.48	102.094	201.308	101.764	195.663	102.991	212.881
	34.5	102.094	201.306	102.367	195.531	102.642	213.21
	34.52	102.171	201.258	102.968	195.374	102.251	213.573
	34.54	102.327	201.17	103.544	195.186	101.836	213.971
	34.56	102.564	201.057	104.071	194.955	101.414	214.394
	34.58	102.874	200.938	104.531	194.673	101.004	214.831
	34.6	103.247	200.834	104.908	194.33	100.623	215.269
	34.62	103.669	200.767	105.191	193.924	100.288	215.692
	34.64	104.121	200.753	105.377	193.455	100.011	216.09
	34.66	104.586	200.803	105.466	192.933	99.8012	216.453
	34.68	105.045	200.919	105.461	192.374	99.6647	216.779
	34.7	105.483	201.095	105.37	191.801	99.6017	217.067
	34.72	105.885	201.314	105.204	191.244	99.609	217.324
	34.74	106.241	201.554	104.973	190.732	99.6797	217.557
	34.76	106.544	201.786	104.687	190.298	99.8043	217.774
	34.78	106.791	201.982	104.358	189.969	99.971	217.983
	34.8	106.982	202.116	103.995	189.769	100.167	218.189
	34.82	107.12	202.166	103.608	189.712	100.381	218.393
	34.84	107.208	202.121	103.205	189.806	100.598	218.595
	34.86	107.252	201.979	102.796	190.047	100.81	218.786
	34.88	107.255	201.75	102.389	190.425	101.005	218.957
	34.9	107.221	201.454	101.995	190.922	101.176	219.097
	34.92	107.15	201.119	101.622	191.513	101.314	219.192
	34.94	107.045	200.779	101.279	192.173	101.414	219.229
	34.96	106.905	200.471	100.975	192.872	101.47	219.195
	34.98	106.73	200.228	100.715	193.582	101.478	219.079
	35	106.521	200.081	100.503	194.276	101.433	218.873
	35.02	106.279	200.053	100.34	194.928	101.335	218.57
	35.04	106.009	200.157	100.225	195.519	101.183	218.169
	35.06	105.716	200.397	100.154	196.03	100.979	217.668
	35.08	105.405	200.763	100.123	196.449	100.73	217.073
	35.1	105.086	201.24	100.127	196.769	100.445	216.39
	35.12	104.767	201.801	100.164	196.988	100.136	215.632
	35.14	104.455	202.415	100.232	197.109	99.8205	214.811
	35.16	104.159	203.048	100.336	197.142	99.5165	213.948
	35.18	103.885	203.666	100.478	197.103	99.244	213.061
	35.2	103.641	204.235	100.667	197.012	99.0229	212.172
	35.22	103.431	204.727	100.91	196.892	98.8715	211.302
	35.24	103.26	205.119	101.213	196.77	98.8047	210.471
	35.26	103.131	205.393	101.581	196.672	98.8326	209.696
	35.28	103.048	205.541	102.012	196.619	98.9597	208.991
	35.3	103.016	205.558	102.498	196.629	99.1843	208.367
	35.32	103.036	205.447	103.026	196.71	99.4979	207.83
	35.34	103.111	205.216	103.573	196.862	99.8863	207.384
	35.36	103.242	204.876	104.112	197.074	100.33	207.029
	35.38	103.427	204.441	104.611	197.325	100.807	206.765
	35.4	103.664	203.928	105.038	197.586	101.292	206.588
	35.42	103.947	203.354	105.359	197.824	101.759	206.494
	35.44	104.267	202.736	105.549	198.006	102.187	206.479
	35.46	104.613	202.094	105.584	198.101	102.555	206.534
	35.48	104.972	201.446	105.455	198.089	102.847	206.649
	35.5	105.328	200.811	105.159	197.96	103.055	206.811
	35.52	105.665	200.206	104.705	197.719	103.174	207.005
	35.54	105.965	199.647	104.112	197.384	103.208	207.21
	35.56	106.215	199.151	103.407	196.989	103.164	207.406
	35.58	106.397	198.728	102.622	196.573	103.055	207.57
	35.6	106.502	198.387	101.795	196.183	102.897	207.681
	35.62	106.521	198.134	100.962	195.863	102.709	207.724
	35.64	106.451	197.971	100.155	195.652	102.509	207.688
	35.66	106.292	197.892	99.4049	195.575	102.317	207.569
	35.68	106.051	197.891	98.7327	195.643	102.148	207.376
	35.7	105.739	197.957	98.1535	195.846	102.018	207.123
	35.72	105.372	198.076	97.6742	196.16	101.937	206.833
	35.74	104.971	198.232	97.2954	196.546	101.912	206.535
	35.76	104.556	198.407	97.012	196.954	101.947	206.262
	35.78	104.153	198.586	96.8156	197.329	102.04	206.044
	35.8	103.783	198.751	96.6959	197.617	102.188	205.909
	35.82	103.466	198.89	96.6434	197.773	102.383	205.877
	35.84	103.22	198.99	96.65	197.764	102.614	205.96
	35.86	103.056	199.041	96.7107	197.572	102.87	206.162
	35.88	102.977	199.039	96.8235	197.198	103.135	206.475
	35.9	102.984	198.977	96.9894	196.659	103.395	206.884
	35.92	103.068	198.855	97.2115	195.99	103.632	207.367
	35.94	103.216	198.674	97.4936	195.239	103.831	207.898
	35.96	103.411	198.435	97.8389	194.459	103.974	208.45
	35.98	103.635	198.142	98.2486	193.708	104.049	208.995
	36	103.868	197.801	98.7209	193.043	104.041	209.51
	36.02	104.092	197.419	99.2502	192.511	103.943	209.971
	36.04	104.294	197.001	99.8267	192.151	103.749	210.362
	36.06	104.464	196.558	100.437	191.987	103.459	210.67
	36.08	104.594	196.097	101.065	192.031	103.08	210.884
	36.1	104.687	195.629	101.693	192.277	102.624	210.999
	36.12	104.745	195.165	102.301	192.706	102.108	211.013
	36.14	104.778	194.717	102.874	193.289	101.557	210.927
	36.16	104.797	194.298	103.396	193.985	100.996	210.747
	36.18	104.814	193.921	103.854	194.751	100.458	210.48
	36.2	104.845	193.601	104.241	195.54	99.9713	210.143
	36.22	104.902	193.352	104.551	196.307	99.5666	209.753
	36.24	104.998	193.188	104.784	197.012	99.2693	209.334
	36.26	105.144	193.119	104.941	197.621	99.0995	208.913
	36.28	105.347	193.155	105.027	198.112	99.0708	208.522
	36.3	105.611	193.3	105.048	198.469	99.1885	208.19
	36.32	105.936	193.553	105.011	198.688	99.4503	207.949
	36.34	106.317	193.907	104.924	198.775	99.8461	207.824
	36.36	106.741	194.35	104.793	198.742	100.359	207.838
	36.38	107.194	194.862	104.626	198.609	100.969	208.002
	36.4	107.653	195.421	104.427	198.399	101.65	208.32
	36.42	108.093	195.998	104.204	198.137	102.376	208.787
	36.44	108.485	196.564	103.961	197.848	103.122	209.385
	36.46	108.8	197.091	103.701	197.556	103.865	210.09
	36.48	109.011	197.553	103.429	197.28	104.582	210.868
	36.5	109.091	197.927	103.147	197.037	105.256	211.68
	36.52	109.024	198.198	102.858	196.837	105.872	212.484
	36.54	108.798	198.359	102.565	196.688	106.42	213.239
	36.56	108.412	198.406	102.267	196.59	106.891	213.904
	36.58	107.874	198.346	101.967	196.542	107.277	214.447
	36.6	107.203	198.189	101.663	196.539	107.576	214.841
	36.62	106.423	197.948	101.358	196.572	107.784	215.071
	36.64	105.568	197.64	101.051	196.63	107.899	215.132
	36.66	104.675	197.281	100.742	196.703	107.923	215.028
	36.68	103.784	196.889	100.434	196.778	107.858	214.779
	36.7	102.933	196.478	100.13	196.842	107.708	214.41
	36.72	102.159	196.063	99.8333	196.884	107.483	213.956
	36.74	101.493	195.657	99.55	196.892	107.192	213.456
	36.76	100.961	195.275	99.2876	196.858	106.849	212.953
	36.78	100.58	194.929	99.0545	196.774	106.47	212.489
	36.8	100.359	194.636	98.8605	196.638	106.075	212.101
	36.82	100.299	194.411	98.7156	196.449	105.681	211.822
	36.84	100.39	194.272	98.6296	196.21	105.308	211.678
	36.86	100.616	194.235	98.6115	195.928	104.973	211.686
	36.88	100.952	194.313	98.6687	195.612	104.69	211.852
	36.9	101.369	194.518	98.806	195.276	104.47	212.174
	36.92	101.832	194.853	99.0254	194.934	104.319	212.64
	36.94	102.307	195.313	99.3253	194.602	104.238	213.23
	36.96	102.757	195.885	99.7004	194.296	104.224	213.916
	36.98	103.152	196.548	100.142	194.031	104.269	214.664
	37	103.465	197.269	100.636	193.82	104.363	215.437
	37.02	103.677	198.01	101.167	193.672	104.492	216.195
	37.04	103.778	198.729	101.718	193.594	104.641	216.901
	37.06	103.768	199.383	102.266	193.586	104.798	217.521
	37.08	103.655	199.932	102.793	193.647	104.947	218.027
	37.1	103.457	200.343	103.278	193.77	105.079	218.398
	37.12	103.197	200.591	103.703	193.945	105.183	218.624
	37.14	102.904	200.666	104.056	194.16	105.255	218.706
	37.16	102.607	200.569	104.326	194.402	105.29	218.651
	37.18	102.334	200.315	104.512	194.656	105.289	218.477
	37.2	102.112	199.932	104.616	194.911	105.251	218.205
	37.22	101.958	199.454	104.65	195.155	105.18	217.86
	37.24	101.885	198.925	104.629	195.381	105.08	217.464
	37.26	101.895	198.389	104.576	195.584	104.953	217.037
	37.28	101.984	197.888	104.516	195.763	104.805	216.59
	37.3	102.14	197.462	104.477	195.921	104.637	216.129
	37.32	102.344	197.142	104.482	196.063	104.453	215.651
	37.34	102.575	196.952	104.555	196.199	104.253	215.147
	37.36	102.81	196.905	104.712	196.336	104.04	214.603
	37.38	103.025	197.003	104.962	196.487	103.815	214.002
	37.4	103.203	197.242	105.306	196.663	103.579	213.331
	37.42	103.33	197.607	105.736	196.872	103.335	212.576
	37.44	103.398	198.078	106.238	197.122	103.087	211.733
	37.46	103.411	198.63	106.793	197.418	102.84	210.801
	37.48	103.374	199.233	107.375	197.76	102.603	209.79
	37.5	103.305	199.856	107.961	198.144	102.385	208.716
	37.52	103.223	200.471	108.525	198.561	102.194	207.6
	37.54	103.151	201.049	109.046	198.999	102.041	206.472
	37.56	103.112	201.567	109.504	199.44	101.934	205.361
	37.58	103.129	202.007	109.883	199.864	101.879	204.3
	37.6	103.218	202.355	110.174	200.251	101.878	203.32
	37.62	103.388	202.608	110.367	200.578	101.93	202.448
	37.64	103.642	202.765	110.459	200.83	102.029	201.708
	37.66	103.973	202.834	110.448	200.992	102.166	201.116
	37.68	104.365	202.827	110.333	201.057	102.33	200.681
	37.7	104.798	202.758	110.119	201.025	102.507	200.403
	37.72	105.242	202.64	109.81	200.903	102.685	200.273
	37.74	105.669	202.488	109.418	200.704	102.853	200.274
	37.76	106.05	202.311	108.956	200.45	103	200.381
	37.78	106.358	202.115	108.442	200.162	103.122	200.565
	37.8	106.572	201.899	107.898	199.867	103.214	200.793
	37.82	106.68	201.66	107.35	199.587	103.275	201.032
	37.84	106.678	201.388	106.824	199.344	103.307	201.255
	37.86	106.571	201.074	106.346	199.155	103.31	201.438
	37.88	106.372	200.707	105.941	199.03	103.285	201.569
	37.9	106.1	200.277	105.629	198.975	103.23	201.646
	37.92	105.781	199.78	105.423	198.991	103.145	201.678
	37.94	105.44	199.214	105.33	199.073	103.026	201.682
	37.96	105.105	198.586	105.35	199.216	102.87	201.687
	37.98	104.798	197.908	105.474	199.412	102.674	201.724
	38	104.538	197.197	105.691	199.654	102.439	201.825
	38.02	104.337	196.477	105.981	199.935	102.167	202.02
	38.04	104.202	195.771	106.326	200.252	101.865	202.33
	38.06	104.131	195.105	106.705	200.599	101.543	202.769
	38.08	104.119	194.502	107.098	200.974	101.216	203.337
	38.1	104.153	193.981	107.487	201.373	100.898	204.022
	38.12	104.22	193.557	107.856	201.789	100.608	204.801
	38.14	104.302	193.236	108.194	202.214	100.362	205.639
	38.16	104.385	193.02	108.492	202.634	100.173	206.497
	38.18	104.453	192.9	108.744	203.032	100.052	207.333
	38.2	104.496	192.866	108.948	203.391	100.007	208.103
	38.22	104.504	192.901	109.105	203.689	100.039	208.77
	38.24	104.474	192.986	109.219	203.905	100.147	209.302
	38.26	104.405	193.101	109.296	204.022	100.325	209.678
	38.28	104.301	193.227	109.346	204.024	100.567	209.886
	38.3	104.169	193.348	109.381	203.903	100.864	209.923
	38.32	104.016	193.448	109.414	203.658	101.204	209.799
	38.34	103.855	193.519	109.455	203.294	101.577	209.53
	38.36	103.697	193.552	109.517	202.825	101.974	209.139
	38.38	103.555	193.543	109.607	202.269	102.383	208.655
	38.4	103.438	193.492	109.728	201.65	102.794	208.109
	38.42	103.358	193.399	109.877	200.995	103.196	207.533
	38.44	103.322	193.267	110.047	200.33	103.579	206.958
	38.46	103.337	193.1	110.224	199.682	103.933	206.413
	38.48	103.406	192.903	110.392	199.076	104.247	205.921
	38.5	103.528	192.683	110.531	198.53	104.512	205.501
	38.52	103.7	192.448	110.621	198.061	104.72	205.166
	38.54	103.914	192.206	110.645	197.68	104.865	204.921
	38.56	104.16	191.968	110.591	197.39	104.943	204.767
	38.58	104.422	191.744	110.453	197.192	104.955	204.697
	38.6	104.685	191.546	110.23	197.078	104.905	204.701
	38.62	104.928	191.384	109.932	197.039	104.798	204.765
	38.64	105.133	191.27	109.575	197.058	104.645	204.873
	38.66	105.281	191.212	109.181	197.116	104.459	205.009
	38.68	105.356	191.218	108.778	197.192	104.255	205.158
	38.7	105.347	191.294	108.393	197.265	104.049	205.308
	38.72	105.247	191.442	108.057	197.314	103.854	205.45
	38.74	105.057	191.665	107.794	197.323	103.685	205.58
	38.76	104.781	191.959	107.627	197.28	103.55	205.696
	38.78	104.434	192.323	107.571	197.177	103.456	205.798
	38.8	104.034	192.748	107.632	197.017	103.403	205.89
	38.82	103.603	193.226	107.811	196.808	103.386	205.978
	38.84	103.164	193.746	108.097	196.566	103.397	206.067
	38.86	102.743	194.294	108.472	196.312	103.422	206.163
	38.88	102.362	194.852	108.915	196.071	103.448	206.273
	38.9	102.037	195.403	109.395	195.873	103.457	206.401
	38.92	101.782	195.925	109.884	195.744	103.434	206.553
	38.94	101.601	196.398	110.351	195.71	103.367	206.731
	38.96	101.493	196.803	110.771	195.791	103.245	206.939
	38.98	101.452	197.121	111.12	196.002	103.064	207.175
	39	101.466	197.339	111.384	196.348	102.822	207.437
	39.02	101.522	197.452	111.555	196.827	102.523	207.719
	39.04	101.604	197.459	111.632	197.425	102.174	208.011
	39.06	101.699	197.369	111.62	198.121	101.786	208.297
	39.08	101.797	197.199	111.531	198.884	101.37	208.56
	39.1	101.89	196.972	111.378	199.678	100.942	208.778
	39.12	101.976	196.719	111.175	200.462	100.514	208.929
	39.14	102.057	196.473	110.936	201.196	100.102	208.992
	39.16	102.137	196.27	110.674	201.84	99.7164	208.949
	39.18	102.225	196.14	110.395	202.361	99.3691	208.786
	39.2	102.33	196.11	110.105	202.735	99.0689	208.497
	39.22	102.462	196.201	109.805	202.947	98.822	208.085
	39.24	102.628	196.419	109.494	202.994	98.6319	207.563
	39.26	102.836	196.764	109.171	202.886	98.4992	206.951
	39.28	103.089	197.221	108.833	202.641	98.4213	206.279
	39.3	103.388	197.768	108.482	202.288	98.3929	205.58
	39.32	103.73	198.371	108.12	201.858	98.4057	204.891
	39.34	104.113	198.994	107.751	201.386	98.45	204.249
	39.36	104.527	199.595	107.386	200.904	98.5146	203.689
	39.38	104.965	200.137	107.034	200.441	98.5883	203.24
	39.4	105.417	200.584	106.707	200.018	98.6612	202.924
	39.42	105.872	200.907	106.418	199.649	98.7251	202.757
	39.44	106.321	201.087	106.177	199.338	98.7752	202.744
	39.46	106.752	201.115	105.995	199.083	98.8099	202.884
	39.48	107.159	200.991	105.876	198.877	98.8314	203.166
	39.5	107.531	200.726	105.823	198.708	98.845	203.576
	39.52	107.864	200.338	105.835	198.563	98.8582	204.092
	39.54	108.151	199.854	105.907	198.429	98.8796	204.691
	39.56	108.387	199.301	106.031	198.296	98.9171	205.347
	39.58	108.569	198.71	106.2	198.158	98.9764	206.035
	39.6	108.691	198.113	106.402	198.012	99.0598	206.729
	39.62	108.75	197.536	106.629	197.859	99.1651	207.406
	39.64	108.741	197.002	106.873	197.704	99.2851	208.047
	39.66	108.663	196.532	107.129	197.555	99.4085	208.636
	39.68	108.511	196.138	107.393	197.42	99.5203	209.16
	39.7	108.284	195.828	107.665	197.311	99.6043	209.615
	39.72	107.983	195.607	107.948	197.234	99.6442	209.998
	39.74	107.61	195.474	108.244	197.199	99.6267	210.311
	39.76	107.173	195.425	108.556	197.209	99.543	210.56
	39.78	106.679	195.454	108.886	197.269	99.3909	210.755
	39.8	106.141	195.554	109.234	197.378	99.1749	210.904
	39.82	105.573	195.716	109.595	197.534	98.9073	211.016
	39.84	104.993	195.933	109.963	197.733	98.6064	211.1
	39.86	104.417	196.197	110.322	197.969	98.2958	211.159
	39.88	103.864	196.5	110.658	198.233	98.0012	211.193
	39.9	103.349	196.834	110.949	198.514	97.7484	211.199
	39.92	102.888	197.191	111.174	198.803	97.5604	211.168
[truncated: 348,003+ more rows]

## Sheet: Fig 2B
	0 CBD	Rel Curr		10 nM CBD			30 nM CBD			100 nM CBD			300 nM CBD			Averages
	Cell	(after 7-9 min)		Cell	Rel Curr		Cell	Rel Curr		Cell	Rel Curr		Cell	Rel Curr		CBD	Mean	SEM
	BZ_21n04092	1.04992		BZ_21n04004	0.893757		BZ_21n03014	2.17723		AF_21n30033	1.8839		21615_Cell1	1.40643		0	1.18292	0.200753
	BZ_21n17005	1.06974		BZ_21n04027	1.89082		BZ_21n03041	2.34078		AF_21n30047	2.29747		21615_Cell2	6.11281		10 nM	1.22983	0.130287
	AF_21n19037	1.47739		BZ_21n04063	1.04701		BZ_21n03060	2.16079		AF_21n30068	1.14938		21615_Cell3	5.62203		30 nM	1.854	0.189138
	BZ_21n19006	2.83678		BZ_21n16068	1.21754		BZ_21n19037	0.826327		AF_21n30083	4.70922		21615_Cell4	2.04855		100 nM	2.46	0.391719
	AF_21n24077	1.31268		BZ_21n16100	1.2674		BZ_21n19066	3.20534		BZ_21n30067	3.125		21615_Cell5	1.65955		300 nM	3.02114	0.563988
	BZ_21n24003	0.8041		BZ_21n17035	0.907302		AF_21n24029	1.65303		BZ_21n30114	2.40125		21615_Cell6	2.38066
	BZ_21n24026	0.989607		BZ_21n17058	1.38501		AF_21n24055	1.89542		BZ_21d03008	1.4937		21615_Cell7	2.19662
	AF_21n30000	0.645544		Mean	1.22983		AF_21n24087	0.5611		BZ_21d03028	2.595		21615_Cell8	3.02813
	BZ_21n30034	0.938616		Median	1.21754		AF_21n30109	1.67985		Mean	2.45687		21615_Cell10	2.73547
	BZ_21d02023	0.704868		SD	0.344708		AF21d02028	2.90726		Median	2.34936		Mean	3.02114
	Mean	1.18292		SEM	0.130288		AF21d02052	1.47183		SD	1.10406		Median	2.38066
	Median	1.01976		n	7		BZ_21d02062	1.41539		SEM	0.390343		SD	1.69196
	SD	0.634837		0.847351			BZ_21d02090	1.8324		n	8		SEM	0.563988
	SEM	0.200753		unpaired ttest vs 0 CBD			BZ_21d02107	1.82919		0.0148823			n	9
	n	10					Mean	1.854		unpaired ttest vs 0 CBD			0.0118119
							Median	1.8308					unpaired ttest vs 0 CBD
							SD	0.707687
							SEM	0.189137
							n	14
							0.0241127
							unpaired ttest vs 0 CBD
