# Supplementary material for: Cannabidiol activates neuronal Kv7 channels
Source: eLife. 2022 Feb 18;11:e73246. doi: 10.7554/eLife.73246 (PMC8856652; doi:10.7554/eLife.73246)
Supplement: Figure 3—source data 1. [file elife-73246-fig3-data1.xlsx]

## Sheet: Fig 3A
		Control	1 uM CBD	CBD+XE-991
	File	21714028I013	21714028I031	21714028I074
	Time (ms)	Curr (pA)	Curr (pA)	Curr (pA)
	0	180.701	219.528	122.966
	0.01	180.669	219.512	122.909
	0.02	180.619	219.464	122.772
	0.03	180.668	219.385	122.64
	0.04	180.965	219.276	122.606
	0.05	181.632	219.131	122.723
	0.06	182.716	218.924	122.987
	0.07	184.16	218.612	123.345
	0.08	185.81	218.139	123.72
	0.09	187.448	217.46	124.044
	0.1	188.844	216.574	124.275
	0.11	189.816	215.546	124.395
	0.12	190.267	214.504	124.411
	0.13	190.207	213.62	124.345
	0.14	189.738	213.073	124.24
	0.15	189.025	213.005	124.151
	0.16	188.252	213.497	124.133
	0.17	187.571	214.541	124.22
	0.18	187.069	216.032	124.404
	0.19	186.747	217.774	124.635
	0.2	186.524	219.506	124.839
	0.21	186.264	220.951	124.965
	0.22	185.822	221.883	125.019
	0.23	185.094	222.184	125.08
	0.24	184.057	221.881	125.277
	0.25	182.788	221.134	125.733
	0.26	181.443	220.195	126.5
	0.27	180.207	219.331	127.518
	0.28	179.231	218.756	128.625
	0.29	178.586	218.582	129.61
	0.3	178.249	218.798	130.288
	0.31	178.139	219.296	130.566
	0.32	178.177	219.918	130.463
	0.33	178.338	220.521	130.084
	0.34	178.671	221.018	129.57
	0.35	179.266	221.395	129.039
	0.36	180.195	221.684	128.554
	0.37	181.459	221.916	128.124
	0.38	182.971	222.072	127.722
	0.39	184.585	222.074	127.321
	0.4	186.149	221.815	126.914
	0.41	187.554	221.218	126.517
	0.42	188.748	220.288	126.154
	0.43	189.718	219.138	125.824
	0.44	190.459	217.965	125.486
	0.45	190.943	216.98	125.058
	0.46	191.116	216.34	124.459
	0.47	190.928	216.09	123.649
	0.48	190.366	216.158	122.662
	0.49	189.487	216.38	121.617
	0.5	188.42	216.571	120.673
	0.51	187.326	216.595	119.986
	0.52	186.352	216.416	119.654
	0.53	185.577	216.105	119.705
	0.54	184.989	215.798	120.1
	0.55	184.501	215.633	120.763
	0.56	183.994	215.682	121.604
	0.57	183.379	215.922	122.53
	0.58	182.634	216.247	123.445
	0.59	181.818	216.516	124.247
	0.6	181.044	216.606	124.83
	0.61	180.439	216.453	125.095
	0.62	180.098	216.058	124.983
	0.63	180.051	215.481	124.498
	0.64	180.253	214.816	123.734
	0.65	180.598	214.166	122.863
	0.66	180.952	213.63	122.101
	0.67	181.191	213.287	121.648
	0.68	181.244	213.184	121.621
	0.69	181.111	213.331	122.022
	0.7	180.866	213.695	122.749
	0.71	180.629	214.22	123.65
	0.72	180.53	214.844	124.582
	0.73	180.665	215.525	125.459
	0.74	181.072	216.244	126.262
	0.75	181.712	216.997	127.024
	0.76	182.485	217.765	127.789
	0.77	183.246	218.496	128.593
	0.78	183.851	219.094	129.446
	0.79	184.196	219.445	130.338
	0.8	184.252	219.454	131.237
	0.81	184.083	219.091	132.099
	0.82	183.818	218.403	132.867
	0.83	183.606	217.512	133.477
	0.84	183.559	216.571	133.867
	0.85	183.707	215.717	133.987
	0.86	183.994	215.032	133.816
	0.87	184.311	214.526	133.375
	0.88	184.543	214.155	132.735
	0.89	184.613	213.864	132.008
	0.9	184.507	213.626	131.322
	0.91	184.257	213.466	130.783
	0.92	183.918	213.461	130.438
	0.93	183.526	213.703	130.257
	0.94	183.085	214.258	130.146
	0.95	182.559	215.141	129.975
	0.96	181.901	216.296	129.63
	0.97	181.075	217.616	129.055
	0.98	180.088	218.959	128.266
	0.99	179.006	220.179	127.349
	1	177.946	221.151	126.43
	1.01	177.047	221.8	125.636
	1.02	176.438	222.118	125.058
	1.03	176.188	222.169	124.737
	1.04	176.281	222.067	124.664
	1.05	176.602	221.935	124.79
	1.06	176.967	221.861	125.046
	1.07	177.17	221.868	125.345
	1.08	177.047	221.906	125.596
	1.09	176.535	221.879	125.722
	1.1	175.686	221.683	125.693
	1.11	174.644	221.249	125.545
	1.12	173.599	220.581	125.393
	1.13	172.723	219.769	125.383
	1.14	172.141	218.963	125.637
	1.15	171.922	218.337	126.18
	1.16	172.094	218.029	126.924
	1.17	172.661	218.095	127.694
	1.18	173.61	218.484	128.301
	1.19	174.899	219.054	128.625
	1.2	176.448	219.612	128.656
	1.21	178.137	219.964	128.486
	1.22	179.831	219.968	128.258
	1.23	181.418	219.566	128.096
	1.24	182.829	218.794	128.054
	1.25	184.047	217.77	128.103
	1.26	185.077	216.669	128.156
	1.27	185.917	215.673	128.116
	1.28	186.529	214.927	127.919
	1.29	186.856	214.499	127.557
	1.3	186.849	214.368	127.065
	1.31	186.505	214.445	126.488
	1.32	185.889	214.618	125.846
	1.33	185.115	214.804	125.119
	1.34	184.315	214.987	124.261
	1.35	183.593	215.217	123.24
	1.36	183.007	215.592	122.082
	1.37	182.569	216.206	120.893
	1.38	182.269	217.117	119.849
	1.39	182.105	218.32	119.149
	1.4	182.09	219.737	118.949
	1.41	182.251	221.228	119.312
	1.42	182.593	222.606	120.186
	1.43	183.072	223.66	121.427
	1.44	183.585	224.2	122.845
	1.45	183.98	224.097	124.258
	1.46	184.102	223.329	125.534
	1.47	183.84	221.995	126.607
	1.48	183.172	220.295	127.465
	1.49	182.171	218.477	128.125
	1.5	180.983	216.77	128.61
	1.51	179.781	215.335	128.931
	1.52	178.722	214.248	129.092
	1.53	177.907	213.521	129.106
	1.54	177.369	213.144	129.013
	1.55	177.076	213.116	128.879
	1.56	176.95	213.449	128.786
	1.57	176.892	214.135	128.795
	1.58	176.808	215.116	128.928
	1.59	176.629	216.261	129.148
	1.6	176.313	217.389	129.375
	1.61	175.846	218.32	129.512
	1.62	175.236	218.937	129.47
	1.63	174.518	219.23	129.2
	1.64	173.766	219.291	128.703
	1.65	173.097	219.267	128.036
	1.66	172.661	219.289	127.304
	1.67	172.592	219.418	126.64
	1.68	172.959	219.622	126.182
	1.69	173.721	219.799	126.036
	1.7	174.727	219.833	126.249
	1.71	175.763	219.635	126.797
	1.72	176.632	219.174	127.598
	1.73	177.228	218.474	128.542
	1.74	177.565	217.595	129.525
	1.75	177.749	216.608	130.469
	1.76	177.912	215.586	131.322
	1.77	178.134	214.595	132.037
	1.78	178.401	213.703	132.561
	1.79	178.62	212.977	132.824
	1.8	178.67	212.489	132.757
	1.81	178.478	212.309	132.319
	1.82	178.069	212.496	131.519
	1.83	177.561	213.082	130.423
	1.84	177.126	214.056	129.153
	1.85	176.917	215.351	127.86
	1.86	177.019	216.846	126.705
	1.87	177.432	218.381	125.821
	1.88	178.099	219.783	125.295
	1.89	178.956	220.899	125.142
	1.9	179.954	221.624	125.309
	1.91	181.061	221.927	125.688
	1.92	182.235	221.851	126.138
	1.93	183.395	221.508	126.524
	1.94	184.417	221.043	126.752
	1.95	185.166	220.602	126.787
	1.96	185.547	220.294	126.659
	1.97	185.552	220.168	126.447
	1.98	185.266	220.199	126.246
	1.99	184.837	220.3	126.139
	2	184.419	220.345	126.177
	2.01	184.116	220.205	126.373
	2.02	183.951	219.784	126.711
	2.03	183.88	219.058	127.167
	2.04	183.824	218.091	127.715
	2.05	183.712	217.025	128.332
	2.06	183.499	216.048	128.984
	2.07	183.168	215.341	129.615
	2.08	182.718	215.024	130.141
	2.09	182.164	215.111	130.467
	2.1	181.539	215.505	130.525
	2.11	180.906	216.025	130.303
	2.12	180.355	216.46	129.862
	2.13	179.988	216.639	129.321
	2.14	179.88	216.481	128.809
	2.15	180.048	216.026	128.416
	2.16	180.434	215.42	128.157
	2.17	180.92	214.878	127.973
	2.18	181.371	214.62	127.765
	2.19	181.684	214.81	127.444
	2.2	181.826	215.507	126.97
	2.21	181.839	216.651	126.369
	2.22	181.807	218.084	125.72
	2.23	181.816	219.583	125.134
	2.24	181.909	220.919	124.723
	2.25	182.071	221.899	124.578
	2.26	182.241	222.396	124.752
	2.27	182.346	222.36	125.239
	2.28	182.339	221.817	125.974
	2.29	182.228	220.852	126.83
	2.3	182.08	219.586	127.638
	2.31	182.005	218.151	128.22
	2.32	182.12	216.672	128.429
	2.33	182.494	215.259	128.206
	2.34	183.111	214.017	127.604
	2.35	183.859	213.05	126.794
	2.36	184.559	212.468	126.015
	2.37	185.026	212.368	125.503
	2.38	185.142	212.808	125.406
	2.39	184.905	213.774	125.746
	2.4	184.43	215.158	126.412
	2.41	183.897	216.767	127.208
	2.42	183.48	218.365	127.924
	2.43	183.273	219.731	128.39
	2.44	183.262	220.719	128.529
	2.45	183.342	221.286	128.364
	2.46	183.379	221.479	128.021
	2.47	183.277	221.39	127.694
	2.48	183.024	221.101	127.59
	2.49	182.692	220.664	127.869
	2.5	182.385	220.102	128.582
	2.51	182.188	219.45	129.658
	2.52	182.123	218.78	130.92
	2.53	182.152	218.209	132.153
	2.54	182.218	217.861	133.17
	2.55	182.296	217.824	133.856
	2.56	182.411	218.103	134.172
	2.57	182.625	218.61	134.135
	2.58	182.978	219.187	133.776
	2.59	183.446	219.645	133.123
	2.6	183.921	219.826	132.191
	2.61	184.237	219.646	131.006
	2.62	184.24	219.122	129.624
	2.63	183.846	218.37	128.141
	2.64	183.089	217.556	126.696
	2.65	182.121	216.841	125.442
	2.66	181.17	216.323	124.52
	2.67	180.479	216.005	124.019
	2.68	180.253	215.819	123.952
	2.69	180.606	215.672	124.249
	2.7	181.554	215.502	124.771
	2.71	183.015	215.312	125.345
	2.72	184.828	215.164	125.812
	2.73	186.784	215.139	126.067
	2.74	188.65	215.288	126.094
	2.75	190.205	215.605	125.969
	2.76	191.267	216.032	125.833
	2.77	191.731	216.493	125.845
	2.78	191.588	216.936	126.111
	2.79	190.935	217.352	126.644
	2.8	189.952	217.77	127.348
	2.81	188.857	218.219	128.062
	2.82	187.855	218.691	128.624
	2.83	187.091	219.115	128.945
	2.84	186.638	219.365	129.043
	2.85	186.504	219.294	129.034
	2.86	186.655	218.782	129.074
	2.87	187.033	217.781	129.285
	2.88	187.565	216.346	129.699
	2.89	188.163	214.634	130.232
	2.9	188.733	212.887	130.708
	2.91	189.189	211.389	130.921
	2.92	189.477	210.401	130.697
	2.93	189.582	210.101	129.962
	2.94	189.53	210.528	128.764
	2.95	189.375	211.569	127.265
	2.96	189.178	212.979	125.696
	2.97	188.992	214.445	124.291
	2.98	188.849	215.672	123.233
	2.99	188.767	216.457	122.613
	3	188.746	216.739	122.427
	3.01	188.772	216.59	122.593
	3.02	188.825	216.175	122.986
	3.03	188.869	215.682	123.472
	3.04	188.861	215.262	123.941
	3.05	188.756	214.997	124.31
	3.06	188.524	214.909	124.534
	3.07	188.165	214.995	124.595
	3.08	187.714	215.257	124.496
	3.09	187.238	215.722	124.26
	3.1	186.815	216.416	123.93
	3.11	186.511	217.341	123.568
	3.12	186.355	218.438	123.251
	3.13	186.334	219.586	123.064
	3.14	186.392	220.631	123.079
	3.15	186.449	221.432	123.337
	3.16	186.413	221.903	123.825
	3.17	186.203	222.036	124.473
	3.18	185.772	221.889	125.167
	3.19	185.122	221.545	125.777
	3.2	184.322	221.07	126.194
	3.21	183.498	220.488	126.363
	3.22	182.805	219.775	126.297
	3.23	182.389	218.898	126.072
	3.24	182.344	217.856	125.813
	3.25	182.685	216.721	125.658
	3.26	183.347	215.635	125.727
	3.27	184.202	214.781	126.084
	3.28	185.093	214.319	126.72
	3.29	185.864	214.335	127.555
	3.3	186.393	214.808	128.457
	3.31	186.619	215.629	129.284
	3.32	186.547	216.625	129.917
	3.33	186.252	217.608	130.286
	3.34	185.864	218.406	130.375
	3.35	185.543	218.891	130.215
	3.36	185.447	219.001	129.861
	3.37	185.7	218.754	129.384
	3.38	186.356	218.244	128.851
	3.39	187.371	217.626	128.333
	3.4	188.596	217.067	127.894
	3.41	189.806	216.695	127.592
	3.42	190.758	216.567	127.454
	3.43	191.273	216.659	127.466
	3.44	191.296	216.889	127.555
	3.45	190.915	217.168	127.604
	3.46	190.324	217.43	127.495
	3.47	189.743	217.644	127.157
	3.48	189.333	217.799	126.608
	3.49	189.141	217.881	125.956
	3.5	189.098	217.861	125.356
	3.51	189.066	217.711	124.949
	3.52	188.905	217.434	124.804
	3.53	188.534	217.091	124.898
	3.54	187.963	216.8	125.142
	3.55	187.272	216.701	125.431
	3.56	186.573	216.904	125.68
	3.57	185.953	217.431	125.851
	3.58	185.446	218.2	125.935
	3.59	185.029	219.048	125.936
	3.6	184.658	219.784	125.852
	3.61	184.306	220.258	125.675
	3.62	183.986	220.404	125.404
	3.63	183.749	220.258	125.047
	3.64	183.656	219.938	124.629
	3.65	183.739	219.598	124.185
	3.66	183.985	219.379	123.755
	3.67	184.338	219.363	123.384
	3.68	184.725	219.549	123.127
	3.69	185.092	219.856	123.042
	3.7	185.424	220.148	123.18
	3.71	185.737	220.285	123.567
	3.72	186.06	220.172	124.203
	3.73	186.406	219.796	125.066
	3.74	186.752	219.234	126.119
	3.75	187.044	218.634	127.32
	3.76	187.229	218.158	128.604
	3.77	187.272	217.93	129.868
	3.78	187.18	217.988	130.969
	3.79	186.991	218.277	131.744
	3.8	186.751	218.681	132.063
	3.81	186.482	219.084	131.873
	3.82	186.166	219.432	131.229
	3.83	185.748	219.76	130.279
	3.84	185.154	220.171	129.213
	3.85	184.327	220.778	128.196
	3.86	183.251	221.632	127.327
	3.87	181.976	222.686	126.629
	3.88	180.61	223.791	126.08
	3.89	179.304	224.746	125.658
	3.9	178.215	225.359	125.378
	3.91	177.475	225.504	125.28
	3.92	177.154	225.153	125.401
	3.93	177.252	224.376	125.728
	3.94	177.701	223.32	126.177
	3.95	178.388	222.168	126.611
	3.96	179.193	221.106	126.873
	3.97	180.011	220.281	126.843
	3.98	180.761	219.778	126.465
	3.99	181.378	219.611	125.758
	4	181.799	219.727	124.794
	4.01	181.952	220.038	123.669
	4.02	181.764	220.446	122.481
	4.03	181.191	220.877	121.318
	4.04	180.257	221.288	120.259
	4.05	179.07	221.658	119.388
	4.06	177.821	221.965	118.795
	4.07	176.746	222.171	118.567
	4.08	176.059	222.219	118.766
	4.09	175.896	222.051	119.415
	4.1	176.267	221.63	120.489
	4.11	177.065	220.961	121.927
	4.12	178.1	220.096	123.638
	4.13	179.175	219.117	125.513
	4.14	180.151	218.12	127.415
	4.15	180.992	217.191	129.181
	4.16	181.764	216.394	130.647
	4.17	182.586	215.771	131.679
	4.18	183.554	215.345	132.219
	4.19	184.665	215.128	132.303
	4.2	185.779	215.125	132.046
	4.21	186.645	215.333	131.598
	4.22	186.986	215.731	131.093
	4.23	186.615	216.277	130.619
	4.24	185.521	216.9	130.215
	4.25	183.896	217.519	129.885
	4.26	182.08	218.049	129.616
	4.27	180.459	218.424	129.375
	4.28	179.346	218.603	129.106
	4.29	178.909	218.573	128.731
	4.3	179.138	218.349	128.171
	4.31	179.883	217.969	127.383
	4.32	180.912	217.508	126.401
	4.33	181.982	217.075	125.346
	4.34	182.89	216.798	124.407
	4.35	183.508	216.792	123.783
	4.36	183.786	217.116	123.623
	4.37	183.743	217.739	123.978
	4.38	183.445	218.544	124.793
	4.39	182.985	219.354	125.934
	4.4	182.45	219.999	127.222
	4.41	181.908	220.379	128.48
	4.42	181.383	220.495	129.555
	4.43	180.849	220.449	130.339
	4.44	180.249	220.391	130.78
	4.45	179.524	220.455	130.889
	4.46	178.652	220.706	130.735
	4.47	177.683	221.122	130.431
	4.48	176.736	221.617	130.1
	4.49	175.968	222.088	129.843
	4.5	175.511	222.454	129.712
	4.51	175.421	222.674	129.693
	4.52	175.648	222.724	129.714
	4.53	176.061	222.577	129.665
	4.54	176.505	222.174	129.432
	4.55	176.878	221.438	128.937
	4.56	177.164	220.31	128.168
	4.57	177.433	218.8	127.195
	4.58	177.783	217.023	126.148
	4.59	178.271	215.203	125.177
	4.6	178.871	213.628	124.398
	4.61	179.484	212.577	123.857
	4.62	179.999	212.234	123.529
	4.63	180.364	212.629	123.342
	4.64	180.631	213.622	123.221
	4.65	180.95	214.94	123.13
	4.66	181.489	216.254	123.08
	4.67	182.348	217.269	123.121
	4.68	183.475	217.789	123.313
	4.69	184.656	217.755	123.693
	4.7	185.565	217.232	124.253
	4.71	185.876	216.37	124.942
	4.72	185.385	215.35	125.671
	4.73	184.093	214.336	126.347
	4.74	182.22	213.453	126.886
	4.75	180.138	212.778	127.243
	4.76	178.262	212.355	127.41
	4.77	176.917	212.21	127.416
	4.78	176.264	212.357	127.32
	4.79	176.275	212.793	127.192
	4.8	176.787	213.485	127.109
	4.81	177.589	214.356	127.148
	4.82	178.506	215.286	127.381
	4.83	179.444	216.121	127.869
	4.84	180.379	216.706	128.653
	4.85	181.306	216.923	129.733
	4.86	182.204	216.725	131.046
	4.87	183.01	216.159	132.458
	4.88	183.652	215.351	133.77
	4.89	184.075	214.481	134.754
	4.9	184.272	213.722	135.203
	4.91	184.265	213.192	134.989
	4.92	184.076	212.917	134.102
	4.93	183.695	212.831	132.655
	4.94	183.083	212.804	130.859
	4.95	182.201	212.692	128.964
	4.96	181.054	212.382	127.211
	4.97	179.722	211.835	125.791
	4.98	178.353	211.087	124.82
	4.99	177.122	210.244	124.33
	5	176.17	209.444	124.269
	5.01	175.564	208.825	124.5
	5.02	175.271	208.486	124.826
	5.03	175.182	208.472	125.038
	5.04	175.153	208.769	124.976
	5.05	175.064	209.314	124.582
	5.06	174.863	210.019	123.918
	5.07	174.577	210.78	123.149
	5.08	174.301	211.495	122.473
	5.09	174.143	212.071	122.061
	5.1	174.176	212.436	121.99
	5.11	174.405	212.55	122.223
	5.12	174.759	212.426	122.627
	5.13	175.122	212.125	123.015
	5.14	175.369	211.757	123.205
	5.15	175.402	211.459	123.07
	5.16	175.175	211.364	122.575
	5.17	174.697	211.568	121.792
	5.18	174.033	212.096	120.899
	5.19	173.29	212.887	120.151
	5.2	172.6	213.799	119.823
	5.21	172.092	214.643	120.131
	5.22	171.863	215.231	121.147
	5.23	171.948	215.44	122.756
	5.24	172.318	215.246	124.664
	5.25	172.888	214.74	126.491
	5.26	173.549	214.093	127.88
	5.27	174.193	213.49	128.617
	5.28	174.726	213.06	128.691
	5.29	175.072	212.818	128.279
	5.3	175.176	212.669	127.671
	5.31	175.011	212.456	127.159
	5.32	174.595	212.041	126.942
	5.33	174.003	211.388	127.083
	5.34	173.371	210.592	127.519
	5.35	172.87	209.86	128.125
	5.36	172.674	209.429	128.775
	5.37	172.91	209.488	129.383
	5.38	173.631	210.108	129.903
	5.39	174.801	211.229	130.308
	5.4	176.304	212.685	130.577
	5.41	177.973	214.257	130.691
	5.42	179.619	215.724	130.655
	5.43	181.072	216.908	130.517
	5.44	182.204	217.685	130.364
	5.45	182.956	217.988	130.293
	5.46	183.343	217.797	130.381
	5.47	183.454	217.13	130.654
	5.48	183.428	216.039	131.085
	5.49	183.427	214.626	131.597
	5.5	183.585	213.043	132.074
	5.51	183.961	211.49	132.369
	5.52	184.518	210.182	132.329
	5.53	185.132	209.296	131.82
	5.54	185.639	208.929	130.776
	5.55	185.9	209.06	129.245
	5.56	185.854	209.563	127.394
	5.57	185.539	210.254	125.491
	5.58	185.066	210.954	123.836
	5.59	184.576	211.552	122.687
	5.6	184.188	212.034	122.2
	5.61	183.968	212.467	122.401
	5.62	183.923	212.95	123.191
	5.63	184.021	213.558	124.381
	5.64	184.208	214.294	125.731
	5.65	184.413	215.079	126.995
	5.66	184.555	215.774	127.956
	5.67	184.541	216.223	128.466
	5.68	184.27	216.295	128.47
	5.69	183.663	215.917	128.016
	5.7	182.682	215.093	127.234
	5.71	181.35	213.9	126.298
	5.72	179.749	212.488	125.38
	5.73	178.001	211.049	124.612
	5.74	176.243	209.786	124.076
	5.75	174.609	208.873	123.809
	5.76	173.213	208.414	123.809
	5.77	172.147	208.428	124.044
	5.78	171.476	208.843	124.445
	5.79	171.237	209.522	124.897
	5.8	171.443	210.296	125.249
	5.81	172.085	211.004	125.338
	5.82	173.147	211.525	125.036
	5.83	174.608	211.792	124.291
	5.84	176.443	211.794	123.157
	5.85	178.601	211.555	121.773
	5.86	180.996	211.115	120.333
	5.87	183.492	210.517	119.02
	5.88	185.915	209.802	117.962
	5.89	188.082	209.028	117.206
	5.9	189.836	208.272	116.719
	5.91	191.069	207.621	116.421
	5.92	191.734	207.154	116.214
	5.93	191.831	206.908	116.032
	5.94	191.395	206.866	115.865
	5.95	190.479	206.97	115.774
	5.96	189.157	207.152	115.878
	5.97	187.512	207.379	116.311
	5.98	185.64	207.678	117.167
	5.99	183.639	208.128	118.443
	6	181.609	208.833	120.015
	6.01	179.657	209.863	121.659
	6.02	177.899	211.216	123.108
	6.03	176.455	212.802	124.127
	6.04	175.432	214.457	124.58
	6.05	174.903	215.993	124.455
	6.06	174.886	217.25	123.857
	6.07	175.339	218.135	122.974
	6.08	176.171	218.634	122.027
	6.09	177.254	218.792	121.229
	6.1	178.449	218.675	120.743
	6.11	179.617	218.339	120.662
	6.12	180.639	217.813	120.996
	6.13	181.426	217.109	121.679
	6.14	181.934	216.256	122.585
	6.15	182.17	215.314	123.552
	6.16	182.191	214.384	124.41
	6.17	182.086	213.584	125
	6.18	181.952	213.01	125.199
	6.19	181.877	212.708	124.937
	6.2	181.914	212.651	124.212
	6.21	182.069	212.753	123.095
	6.22	182.304	212.903	121.723
	6.23	182.542	213.001	120.275
	6.24	182.693	213.003	118.939
	6.25	182.683	212.938	117.882
	6.26	182.479	212.896	117.223
	6.27	182.101	212.992	117.014
	6.28	181.619	213.309	117.249
	6.29	181.122	213.849	117.867
	6.3	180.694	214.516	118.775
	6.31	180.377	215.132	119.869
	6.32	180.154	215.495	121.048
	6.33	179.961	215.454	122.229
	6.34	179.699	214.967	123.348
	6.35	179.282	214.125	124.354
	6.36	178.673	213.13	125.211
	6.37	177.91	212.243	125.892
	6.38	177.111	211.71	126.388
	6.39	176.441	211.692	126.716
	6.4	176.067	212.227	126.915
	6.41	176.089	213.221	127.034
	6.42	176.512	214.489	127.107
	6.43	177.234	215.82	127.136
	6.44	178.083	217.039	127.089
	6.45	178.874	218.062	126.907
	6.46	179.462	218.891	126.542
	6.47	179.784	219.594	125.976
	6.48	179.86	220.247	125.24
	6.49	179.769	220.904	124.409
	6.5	179.62	221.572	123.579
	6.51	179.518	222.223	122.844
	6.52	179.541	222.801	122.27
	6.53	179.726	223.243	121.885
	6.54	180.055	223.485	121.69
	6.55	180.46	223.466	121.669
	6.56	180.834	223.146	121.802
	6.57	181.067	222.51	122.073
	6.58	181.083	221.59	122.465
	6.59	180.872	220.466	122.954
	6.6	180.493	219.257	123.514
	6.61	180.033	218.099	124.127
	6.62	179.561	217.111	124.795
	6.63	179.092	216.361	125.547
	6.64	178.587	215.85	126.428
	6.65	177.993	215.514	127.477
	6.66	177.296	215.255	128.693
	6.67	176.556	214.998	130.01
	6.68	175.911	214.735	131.294
	6.69	175.526	214.55	132.363
	6.7	175.53	214.591	133.036
	6.71	175.958	215.016	133.18
	6.72	176.726	215.921	132.747
	6.73	177.65	217.295	131.786
	6.74	178.501	219.015	130.417
	6.75	179.062	220.885	128.803
	6.76	179.188	222.68	127.113
	6.77	178.833	224.195	125.501
	6.78	178.065	225.262	124.103
	6.79	177.045	225.768	123.034
	6.8	175.992	225.651	122.382
	6.81	175.129	224.921	122.194
	6.82	174.618	223.659	122.455
	6.83	174.512	222.022	123.08
	6.84	174.741	220.222	123.917
	6.85	175.141	218.483	124.79
	6.86	175.528	217.009	125.546
	6.87	175.771	215.946	126.098
	6.88	175.843	215.368	126.443
	6.89	175.826	215.273	126.643
	6.9	175.861	215.594	126.786
	6.91	176.073	216.212	126.935
	6.92	176.513	216.985	127.115
	6.93	177.119	217.772	127.303
	6.94	177.736	218.462	127.453
	6.95	178.172	219	127.516
	6.96	178.253	219.393	127.45
	6.97	177.89	219.706	127.239
	6.98	177.096	220.029	126.888
	6.99	175.985	220.44	126.44
	7	174.727	220.963	125.963
	7.01	173.503	221.554	125.541
	7.02	172.459	222.113	125.251
	7.03	171.677	222.521	125.137
	7.04	171.189	222.685	125.203
	7.05	170.987	222.568	125.413
	7.06	171.059	222.195	125.704
	7.07	171.4	221.646	126.009
	7.08	172.016	221.033	126.264
	7.09	172.908	220.486	126.421
	7.1	174.05	220.125	126.453
	7.11	175.381	220.042	126.35
	7.12	176.797	220.276	126.122
	7.13	178.166	220.806	125.782
	7.14	179.359	221.552	125.345
	7.15	180.272	222.395	124.823
	7.16	180.841	223.206	124.233
	7.17	181.042	223.865	123.618
	7.18	180.883	224.281	123.059
	7.19	180.403	224.4	122.676
	7.2	179.674	224.208	122.605
	7.21	178.808	223.724	122.947
	7.22	177.954	222.987	123.727
	7.23	177.266	222.048	124.868
	7.24	176.872	220.963	126.202
	7.25	176.84	219.797	127.522
	7.26	177.158	218.622	128.648
	7.27	177.731	217.518	129.466
	7.28	178.403	216.55	129.947
	7.29	178.983	215.755	130.111
	7.3	179.304	215.133	129.978
	7.31	179.27	214.652	129.536
	7.32	178.901	214.281	128.736
	7.33	178.337	214.003	127.523
	7.34	177.787	213.827	125.885
	7.35	177.453	213.766	123.882
	7.36	177.443	213.814	121.655
	7.37	177.741	213.934	119.402
	7.38	178.223	214.07	117.346
	7.39	178.726	214.173	115.689
	7.4	179.119	214.226	114.584
	7.41	179.358	214.252	114.11
	7.42	179.482	214.292	114.265
	7.43	179.577	214.378	114.973
	7.44	179.729	214.515	116.106
	7.45	179.984	214.687	117.514
	7.46	180.34	214.871	119.052
	7.47	180.764	215.061	120.589
	7.48	181.222	215.27	122.019
	7.49	181.707	215.517	123.257
	7.5	182.228	215.809	124.249
	7.51	182.795	216.115	124.971
	7.52	183.388	216.371	125.44
	7.53	183.94	216.491	125.711
	7.54	184.36	216.392	125.861
	7.55	184.56	216.02	125.969
	7.56	184.499	215.377	126.093
	7.57	184.202	214.521	126.248
	7.58	183.756	213.558	126.407
	7.59	183.279	212.615	126.518
	7.6	182.886	211.814	126.533
	7.61	182.663	211.243	126.443
	7.62	182.645	210.943	126.289
	7.63	182.816	210.904	126.156
	7.64	183.112	211.07	126.139
	7.65	183.43	211.35	126.297
	7.66	183.648	211.632	126.631
	7.67	183.653	211.799	127.082
	7.68	183.378	211.754	127.555
	7.69	182.824	211.447	127.961
	7.7	182.074	210.888	128.244
	7.71	181.266	210.138	128.382
	7.72	180.561	209.29	128.376
	7.73	180.092	208.427	128.23
	7.74	179.93	207.609	127.934
	7.75	180.072	206.863	127.476
	7.76	180.453	206.207	126.861
	7.77	180.965	205.66	126.134
	7.78	181.484	205.253	125.378
	7.79	181.889	205.013	124.69
	7.8	182.075	204.948	124.145
	7.81	181.971	205.035	123.762
	7.82	181.554	205.235	123.497
	7.83	180.862	205.516	123.27
	7.84	179.994	205.862	123.017
	7.85	179.094	206.28	122.731
	7.86	178.322	206.782	122.481
	7.87	177.832	207.367	122.383
	7.88	177.731	208.028	122.549
	7.89	178.057	208.754	123.023
	7.9	178.759	209.548	123.751
	7.91	179.697	210.412	124.586
	7.92	180.667	211.334	125.334
	7.93	181.449	212.253	125.826
	7.94	181.873	213.053	125.974
	7.95	181.866	213.584	125.8
	7.96	181.474	213.716	125.42
	7.97	180.831	213.401	124.994
	7.98	180.113	212.713	124.674
	7.99	179.466	211.843	124.554
	8	178.969	211.04	124.655
	8.01	178.617	210.531	124.937
	8.02	178.351	210.451	125.324
	8.03	178.09	210.81	125.735
	8.04	177.783	211.516	126.106
	8.05	177.433	212.432	126.397
	8.06	177.105	213.43	126.592
	8.07	176.899	214.419	126.699
	8.08	176.905	215.344	126.751
	8.09	177.157	216.164	126.805
	8.1	177.607	216.838	126.929
	8.11	178.133	217.319	127.183
	8.12	178.586	217.582	127.596
	8.13	178.848	217.636	128.15
	8.14	178.874	217.537	128.777
	8.15	178.714	217.362	129.382
	8.16	178.482	217.184	129.865
	8.17	178.318	217.034	130.152
	8.18	178.343	216.903	130.199
	8.19	178.637	216.749	130.01
	8.2	179.221	216.538	129.631
	8.21	180.058	216.263	129.155
	8.22	181.056	215.953	128.709
	8.23	182.071	215.661	128.424
	8.24	182.941	215.441	128.393
	8.25	183.525	215.33	128.629
	8.26	183.743	215.349	129.045
	8.27	183.602	215.513	129.478
	8.28	183.18	215.839	129.735
	8.29	182.589	216.342	129.661
	8.3	181.926	217.018	129.191
	8.31	181.25	217.821	128.371
	8.32	180.58	218.653	127.334
	8.33	179.92	219.38	126.261
	8.34	179.286	219.865	125.331
	8.35	178.728	220.024	124.677
	8.36	178.331	219.848	124.375
	8.37	178.2	219.414	124.437
	8.38	178.433	218.841	124.826
	8.39	179.091	218.243	125.47
	8.4	180.161	217.675	126.278
	8.41	181.547	217.116	127.159
	8.42	183.068	216.483	128.045
	8.43	184.492	215.679	128.902
	8.44	185.585	214.641	129.732
	8.45	186.163	213.38	130.563
	8.46	186.125	211.982	131.42
	8.47	185.479	210.588	132.301
	8.48	184.333	209.353	133.168
	8.49	182.88	208.41	133.942
	8.5	181.369	207.836	134.53
	8.51	180.057	207.645	134.844
	8.52	179.159	207.785	134.825
	8.53	178.809	208.149	134.449
	8.54	179.031	208.605	133.737
	8.55	179.752	209.021	132.755
	8.56	180.831	209.299	131.612
	8.57	182.094	209.391	130.446
	8.58	183.364	209.297	129.402
	8.59	184.478	209.05	128.599
	8.6	185.295	208.696	128.105
	8.61	185.713	208.278	127.926
	8.62	185.679	207.841	128.028
	8.63	185.203	207.444	128.356
	8.64	184.356	207.165	128.868
	8.65	183.251	207.098	129.526
	8.66	182.02	207.322	130.287
	8.67	180.79	207.874	131.075
	8.68	179.67	208.718	131.768
	8.69	178.754	209.747	132.215
	8.7	178.133	210.802	132.282
	8.71	177.895	211.72	131.9
	8.72	178.115	212.381	131.111
	8.73	178.816	212.743	130.078
	8.74	179.941	212.856	129.051
	8.75	181.334	212.838	128.305
	8.76	182.767	212.833	128.061
	8.77	184.002	212.97	128.416
	8.78	184.87	213.315	129.31
	8.79	185.313	213.855	130.547
	8.8	185.398	214.5	131.856
	8.81	185.26	215.102	132.974
	8.82	185.045	215.499	133.713
	8.83	184.852	215.557	133.994
	8.84	184.719	215.216	133.832
	8.85	184.642	214.513	133.304
	8.86	184.607	213.59	132.513
	8.87	184.612	212.668	131.575
	8.88	184.67	211.997	130.616
	8.89	184.791	211.788	129.783
	8.9	184.956	212.153	129.225
	8.91	185.106	213.071	129.055
	8.92	185.148	214.395	129.293
	8.93	184.99	215.898	129.841
	8.94	184.576	217.332	130.494
	8.95	183.921	218.496	131.011
	8.96	183.112	219.273	131.197
	8.97	182.295	219.65	130.973
	8.98	181.629	219.702	130.388
	8.99	181.237	219.562	129.588
	9	181.181	219.382	128.749
	9.01	181.442	219.286	128.029
	9.02	181.94	219.34	127.532
	9.03	182.549	219.543	127.316
	9.04	183.116	219.83	127.401
	9.05	183.479	220.102	127.765
	9.06	183.494	220.259	128.335
	9.07	183.076	220.233	128.973
	9.08	182.237	220.006	129.486
	9.09	181.104	219.609	129.666
	9.1	179.896	219.102	129.353
	9.11	178.854	218.542	128.502
	9.12	178.156	217.955	127.218
	9.13	177.858	217.331	125.746
	9.14	177.89	216.636	124.413
	9.15	178.099	215.852	123.543
	9.16	178.323	215	123.357
	9.17	178.451	214.148	123.912
	9.18	178.444	213.387	125.088
	9.19	178.321	212.794	126.635
	9.2	178.114	212.401	128.264
	9.21	177.834	212.201	129.732
	9.22	177.466	212.174	130.907
	9.23	176.981	212.333	131.763
	9.24	176.365	212.734	132.348
	9.25	175.644	213.454	132.72
	9.26	174.89	214.537	132.912
	9.27	174.203	215.927	132.92
	9.28	173.682	217.449	132.715
	9.29	173.398	218.834	132.263
	9.3	173.372	219.801	131.543
	9.31	173.569	220.151	130.565
	9.32	173.914	219.827	129.372
	9.33	174.318	218.924	128.049
	9.34	174.702	217.633	126.719
	9.35	175.022	216.171	125.521
	9.36	175.261	214.708	124.572
	9.37	175.424	213.348	123.926
	9.38	175.522	212.148	123.555
	9.39	175.573	211.163	123.355
	9.4	175.612	210.48	123.195
	9.41	175.692	210.207	122.992
	9.42	175.882	210.421	122.759
	9.43	176.221	211.104	122.619
	9.44	176.692	212.109	122.761
	9.45	177.202	213.181	123.347
	9.46	177.606	214.04	124.43
	9.47	177.767	214.479	125.909
	9.48	177.624	214.438	127.551
	9.49	177.239	214.015	129.076
	9.5	176.784	213.422	130.251
	9.51	176.487	212.89	130.961
	9.52	176.544	212.588	131.209
	9.53	177.05	212.578	131.072
	9.54	177.968	212.813	130.636
	9.55	179.141	213.178	129.952
	9.56	180.35	213.543	129.048
	9.57	181.382	213.804	127.956
	9.58	182.09	213.901	126.756
	9.59	182.425	213.813	125.568
	9.6	182.434	213.552	124.512
	9.61	182.231	213.154	123.661
	9.62	181.953	212.683	123.016
	9.63	181.719	212.235	122.528
	9.64	181.606	211.94	122.158
	9.65	181.639	211.933	121.926
	9.66	181.798	212.332	121.936
	9.67	182.04	213.188	122.334
	9.68	182.316	214.466	123.237
	9.69	182.591	216.038	124.665
	9.7	182.848	217.707	126.499
	9.71	183.088	219.258	128.506
	9.72	183.316	220.511	130.4
	9.73	183.529	221.37	131.925
	9.74	183.711	221.843	132.92
	9.75	183.826	222.023	133.35
	9.76	183.836	222.049	133.284
	9.77	183.708	222.048	132.849
	9.78	183.441	222.102	132.177
	9.79	183.077	222.228	131.366
	9.8	182.707	222.381	130.462
	9.81	182.455	222.484	129.472
	9.82	182.438	222.45	128.384
	9.83	182.712	222.209	127.189
	9.84	183.223	221.735	125.903
	9.85	183.799	221.057	124.576
	9.86	184.181	220.26	123.294
	9.87	184.107	219.47	122.165
	9.88	183.406	218.819	121.296
	9.89	182.078	218.398	120.764
	9.9	180.305	218.222	120.595
	9.91	178.41	218.21	120.757
	9.92	176.753	218.207	121.167
	9.93	175.621	218.039	121.721
	9.94	175.153	217.574	122.324
	9.95	175.328	216.779	122.92
	9.96	176.011	215.725	123.498
	9.97	177.033	214.561	124.082
	9.98	178.254	213.461	124.704
	9.99	179.582	212.574	125.375
	10	180.958	211.991	126.068
	10.01	182.31	211.744	126.711
	10.02	183.53	211.804	127.21
	10.03	184.477	212.087	127.477
	10.04	185.015	212.462	127.457
	10.05	185.051	212.77	127.146
	10.06	184.572	212.868	126.591
	10.07	183.644	212.68	125.886
	10.08	182.395	212.235	125.154
	10.09	180.985	211.655	124.532
	10.1	179.573	211.115	124.155
	10.11	178.298	210.771	124.13
	10.12	177.269	210.709	124.512
	10.13	176.574	210.921	125.275
	10.14	176.283	211.323	126.301
	10.15	176.45	211.787	127.398
	10.16	177.103	212.17	128.336
	10.17	178.219	212.339	128.915
	10.18	179.708	212.186	129.019
	10.19	181.395	211.661	128.641
	10.2	183.034	210.795	127.878
	10.21	184.347	209.717	126.903
	10.22	185.089	208.642	125.914
	10.23	185.112	207.815	125.095
	10.24	184.404	207.437	124.582
	10.25	183.095	207.602	124.45
	10.26	181.409	208.265	124.709
	10.27	179.606	209.27	125.326
	10.28	177.914	210.4	126.234
	10.29	176.501	211.445	127.345
	10.3	175.465	212.247	128.552
	10.31	174.857	212.713	129.724
	10.32	174.697	212.817	130.717
	10.33	174.981	212.582	131.396
	10.34	175.681	212.061	131.677
	10.35	176.729	211.33	131.558
	10.36	178.017	210.472	131.129
	10.37	179.403	209.582	130.535
	10.38	180.739	208.767	129.929
	10.39	181.901	208.138	129.407
	10.4	182.815	207.802	128.984
	10.41	183.467	207.838	128.602
	10.42	183.899	208.271	128.175
	10.43	184.19	209.056	127.644
	10.44	184.43	210.082	127.021
	10.45	184.694	211.196	126.386
	10.46	185.016	212.239	125.852
	10.47	185.378	213.086	125.506
	10.48	185.699	213.672	125.37
	10.49	185.851	213.989	125.393
	10.5	185.689	214.076	125.488
	10.51	185.098	213.984	125.574
	10.52	184.049	213.751	125.609
	10.53	182.632	213.395	125.595
	10.54	181.055	212.921	125.552
	10.55	179.596	212.349	125.503
	10.56	178.53	211.745	125.467
	10.57	178.047	211.227	125.48
	10.58	178.208	210.952	125.605
	10.59	178.929	211.066	125.937
	10.6	180.025	211.649	126.569
	10.61	181.258	212.67	127.55
	10.62	182.403	213.989	128.844
	10.63	183.279	215.392	130.328
	10.64	183.77	216.659	131.809
	10.65	183.821	217.623	133.078
	10.66	183.432	218.209	133.958
	10.67	182.661	218.437	134.334
	10.68	181.624	218.391	134.164
	10.69	180.497	218.177	133.479
	10.7	179.485	217.873	132.37
	10.71	178.773	217.497	130.981
	10.72	178.464	217.004	129.493
	10.73	178.541	216.311	128.094
	10.74	178.867	215.351	126.939
	10.75	179.243	214.115	126.12
	10.76	179.482	212.678	125.646
	10.77	179.466	211.184	125.455
	10.78	179.169	209.801	125.461
	10.79	178.635	208.674	125.599
	10.8	177.937	207.897	125.854
	10.81	177.163	207.507	126.263
	10.82	176.409	207.495	126.879
	10.83	175.794	207.82	127.73
	10.84	175.452	208.417	128.786
	10.85	175.507	209.196	129.95
	10.86	176.02	210.053	131.085
	10.87	176.951	210.878	132.043
	10.88	178.155	211.58	132.698
	10.89	179.423	212.107	132.97
	10.9	180.533	212.455	132.836
	10.91	181.317	212.661	132.339
	10.92	181.687	212.793	131.589
	10.93	181.636	212.924	130.751
	10.94	181.215	213.117	130.007
	10.95	180.514	213.412	129.518
	10.96	179.65	213.819	129.372
	10.97	178.757	214.317	129.568
	10.98	177.982	214.861	130.022
	10.99	177.464	215.39	130.61
	11	177.302	215.846	131.216
	11.01	177.535	216.186	131.77
	11.02	178.125	216.39	132.266
	11.03	178.97	216.456	132.741
	11.04	179.931	216.391	133.243
	11.05	180.876	216.205	133.798
	11.06	181.713	215.914	134.389
	11.07	182.403	215.538	134.961
	11.08	182.949	215.1	135.444
	11.09	183.369	214.618	135.779
	11.1	183.66	214.092	135.935
	11.11	183.797	213.504	135.918
	11.12	183.744	212.819	135.754
	11.13	183.479	212.017	135.485
	11.14	183.021	211.112	135.157
	11.15	182.418	210.174	134.814
	11.16	181.731	209.329	134.497
	11.17	181.009	208.735	134.229
	11.18	180.278	208.543	134.004
	11.19	179.554	208.86	133.776
	11.2	178.857	209.715	133.458
	11.21	178.223	211.05	132.942
	11.22	177.694	212.73	132.138
	11.23	177.298	214.56	131.013
	11.24	177.026	216.328	129.613
	11.25	176.838	217.828	128.064
	11.26	176.686	218.904	126.552
	11.27	176.554	219.465	125.277
	11.28	176.488	219.509	124.411
	11.29	176.585	219.112	124.06
	11.3	176.954	218.424	124.239
	11.31	177.656	217.644	124.865
	11.32	178.651	216.988	125.781
	11.33	179.782	216.656	126.784
	11.34	180.809	216.778	127.684
	11.35	181.476	217.378	128.338
	11.36	181.589	218.351	128.685
	11.37	181.084	219.475	128.741
	11.38	180.043	220.47	128.585
	11.39	178.666	221.071	128.317
	11.4	177.201	221.103	128.025
	11.41	175.863	220.514	127.763
	11.42	174.781	219.376	127.53
	11.43	173.984	217.839	127.288
	11.44	173.436	216.096	126.986
	11.45	173.082	214.335	126.595
	11.46	172.885	212.728	126.149
	11.47	172.844	211.408	125.743
	11.48	172.985	210.468	125.513
	11.49	173.341	209.952	125.579
	11.5	173.928	209.858	125.992
	11.51	174.725	210.161	126.711
	11.52	175.661	210.822	127.608
	11.53	176.616	211.808	128.525
	11.54	177.434	213.073	129.321
	11.55	177.953	214.543	129.919
	11.56	178.051	216.101	130.311
	11.57	177.682	217.586	130.536
	11.58	176.894	218.827	130.646
	11.59	175.823	219.679	130.672
	11.6	174.66	220.065	130.624
	11.61	173.602	219.988	130.503
	11.62	172.81	219.53	130.323
	11.63	172.38	218.819	130.128
	11.64	172.336	217.998	129.991
	11.65	172.65	217.191	129.985
	11.66	173.266	216.477	130.159
	11.67	174.135	215.89	130.508
	11.68	175.229	215.431	130.98
	11.69	176.536	215.08	131.482
	11.7	178.037	214.815	131.918
	11.71	179.678	214.616	132.216
	11.72	181.35	214.462	132.341
	11.73	182.908	214.324	132.297
	11.74	184.202	214.172	132.106
	11.75	185.129	213.985	131.787
	11.76	185.677	213.776	131.347
	11.77	185.924	213.592	130.776
	11.78	186.017	213.515	130.063
	11.79	186.11	213.632	129.214
	11.8	186.31	214.007	128.264
	11.81	186.643	214.652	127.285
	11.82	187.058	215.519	126.369
	11.83	187.458	216.517	125.616
	11.84	187.741	217.533	125.108
	11.85	187.843	218.458	124.895
	11.86	187.743	219.213	124.985
	11.87	187.47	219.749	125.349
	11.88	187.091	220.051	125.94
	11.89	186.692	220.129	126.71
	11.9	186.365	220.014	127.622
	11.91	186.189	219.756	128.65
	11.92	186.206	219.419	129.76
	11.93	186.406	219.08	130.897
	11.94	186.721	218.807	131.988
	11.95	187.043	218.648	132.957
	11.96	187.248	218.609	133.757
	11.97	187.24	218.648	134.383
	11.98	186.987	218.685	134.868
	11.99	186.54	218.629	135.254
	12	186.025	218.403	135.563
	12.01	185.616	217.974	135.769
	12.02	185.474	217.359	135.809
	12.03	185.689	216.62	135.599
	12.04	186.237	215.845	135.078
	12.05	186.975	215.13	134.233
	12.06	187.681	214.564	133.124
	12.07	188.111	214.22	131.884
	12.08	188.066	214.144	130.702
	12.09	187.438	214.343	129.777
	12.1	186.217	214.762	129.262
	12.11	184.492	215.283	129.217
	12.12	182.417	215.75	129.584
	12.13	180.194	216.018	130.208
	12.14	178.031	216.006	130.885
	12.15	176.113	215.726	131.432
	12.16	174.573	215.269	131.726
	12.17	173.477	214.751	131.733
	12.18	172.823	214.249	131.486
	12.19	172.558	213.773	131.052
	12.2	172.598	213.27	130.499
	12.21	172.851	212.679	129.872
	12.22	173.246	211.975	129.191
	12.23	173.746	211.203	128.471
	12.24	174.356	210.47	127.746
	12.25	175.1	209.908	127.083
	12.26	176.001	209.631	126.569
	12.27	177.045	209.69	126.29
	12.28	178.17	210.054	126.296
	12.29	179.286	210.612	126.585
	12.3	180.309	211.196	127.114
	12.31	181.203	211.634	127.819
	12.32	181.997	211.793	128.644
	12.33	182.775	211.617	129.545
	12.34	183.641	211.143	130.491
	12.35	184.669	210.486	131.44
	12.36	185.866	209.811	132.337
	12.37	187.157	209.287	133.111
	12.38	188.394	209.05	133.683
	12.39	189.39	209.17	133.99
	12.4	189.963	209.628	133.998
	12.41	189.991	210.325	133.711
	12.42	189.448	211.103	133.178
	12.43	188.421	211.789	132.474
	12.44	187.096	212.246	131.681
	12.45	185.729	212.416	130.867
	12.46	184.588	212.339	130.082
	12.47	183.89	212.149	129.354
	12.48	183.754	212.031	128.708
	12.49	184.165	212.155	128.168
	12.5	184.981	212.617	127.757
	12.51	185.972	213.401	127.476
	12.52	186.876	214.372	127.294
	12.53	187.472	215.324	127.151
	12.54	187.626	216.04	126.983
	12.55	187.315	216.364	126.758
	12.56	186.624	216.253	126.492
	12.57	185.715	215.79	126.243
	12.58	184.781	215.168	126.084
	12.59	183.998	214.632	126.065
	12.6	183.479	214.411	126.19
	12.61	183.257	214.646	126.428
	12.62	183.294	215.361	126.726
	12.63	183.501	216.457	127.037
	12.64	183.782	217.757	127.326
	12.65	184.059	219.058	127.562
	12.66	184.289	220.185	127.713
	12.67	184.456	221.022	127.736
	12.68	184.563	221.52	127.591
	12.69	184.625	221.675	127.27
	12.7	184.667	221.511	126.813
	12.71	184.731	221.056	126.318
	12.72	184.891	220.333	125.929
	12.73	185.239	219.366	125.797
	12.74	185.866	218.19	126.043
	12.75	186.822	216.859	126.715
	12.76	188.082	215.442	127.767
	12.77	189.526	214.023	129.052
	12.78	190.964	212.685	130.356
	12.79	192.173	211.499	131.444
	12.8	192.959	210.523	132.129
	12.81	193.199	209.787	132.328
	12.82	192.866	209.298	132.09
	12.83	192.021	209.037	131.58
	12.84	190.794	208.97	131.024
	12.85	189.35	209.053	130.627
	12.86	187.864	209.241	130.517
	12.87	186.484	209.482	130.715
	12.88	185.312	209.723	131.153
	12.89	184.39	209.915	131.717
	12.9	183.698	210.028	132.291
	12.91	183.179	210.071	132.795
	12.92	182.753	210.102	133.189
	12.93	182.352	210.216	133.466
	12.94	181.922	210.516	133.642
	12.95	181.433	211.068	133.732
	12.96	180.88	211.877	133.734
	12.97	180.284	212.89	133.616
	12.98	179.699	214.022	133.319
	12.99	179.203	215.197	132.767
	13	178.886	216.368	131.905
	13.01	178.821	217.512	130.731
	13.02	179.036	218.595	129.334
	13.03	179.491	219.548	127.883
	13.04	180.075	220.263	126.601
	13.05	180.632	220.632	125.7
	13.06	180.993	220.604	125.314
	13.07	181.03	220.223	125.444
	13.08	180.688	219.624	125.95
	13.09	179.997	218.984	126.591
	13.1	179.067	218.449	127.097
	13.11	178.049	218.082	127.261
	13.12	177.1	217.852	126.997
	13.13	176.342	217.687	126.357
	13.14	175.844	217.533	125.504
	13.15	175.619	217.407	124.651
	13.16	175.64	217.398	123.996
	13.17	175.863	217.624	123.675
	13.18	176.26	218.17	123.741
	13.19	176.832	219.039	124.165
	13.2	177.601	220.145	124.861
	13.21	178.584	221.344	125.725
	13.22	179.758	222.483	126.653
	13.23	181.035	223.441	127.565
	13.24	182.263	224.151	128.395
	13.25	183.27	224.591	129.08
	13.26	183.922	224.771	129.548
	13.27	184.181	224.719	129.724
	13.28	184.132	224.474	129.557
	13.29	183.949	224.09	129.053
	13.3	183.838	223.628	128.302
	13.31	183.95	223.14	127.472
	13.32	184.317	222.651	126.767
	13.33	184.842	222.149	126.365
	13.34	185.334	221.593	126.358
	13.35	185.589	220.938	126.728
	13.36	185.468	220.162	127.353
	13.37	184.948	219.293	128.061
	13.38	184.124	218.408	128.687
	13.39	183.164	217.62	129.126
	13.4	182.249	217.052	129.35
	13.41	181.515	216.798	129.4
	13.42	181.021	216.895	129.363
	13.43	180.758	217.301	129.334
	13.44	180.663	217.902	129.395
	13.45	180.655	218.532	129.605
	13.46	180.662	219.014	129.988
	13.47	180.645	219.211	130.542
	13.48	180.6	219.053	131.231
	13.49	180.549	218.554	131.986
	13.5	180.525	217.802	132.709
	13.51	180.549	216.943	133.292
	13.52	180.619	216.146	133.632
	13.53	180.723	215.572	133.667
	13.54	180.851	215.335	133.397
	13.55	181.025	215.468	132.891
	13.56	181.3	215.914	132.269
	13.57	181.753	216.539	131.669
	13.58	182.447	217.181	131.198
	13.59	183.397	217.699	130.907
	13.6	184.55	218.016	130.782
	13.61	185.78	218.131	130.763
	13.62	186.921	218.1	130.772
	13.63	187.802	218.01	130.737
	13.64	188.285	217.95	130.606
	13.65	188.294	217.989	130.352
	13.66	187.823	218.166	129.974
	13.67	186.939	218.496	129.493
	13.68	185.767	218.961	128.954
	13.69	184.476	219.518	128.42
	13.7	183.258	220.096	127.969
	13.71	182.308	220.603	127.69
	13.72	181.797	220.924	127.669
	13.73	181.843	220.938	127.967
	13.74	182.48	220.532	128.599
	13.75	183.635	219.641	129.51
	13.76	185.124	218.285	130.568
	13.77	186.684	216.596	131.585
	13.78	188.03	214.81	132.351
	13.79	188.928	213.218	132.7
	13.8	189.252	212.095	132.56
	13.81	189.006	211.617	131.979
	13.82	188.301	211.824	131.108
	13.83	187.309	212.614	130.147
	13.84	186.217	213.793	129.267
	13.85	185.183	215.133	128.564
	13.86	184.329	216.425	128.03
	13.87	183.737	217.515	127.585
	13.88	183.455	218.298	127.121
	13.89	183.498	218.718	126.564
	13.9	183.841	218.754	125.902
	13.91	184.423	218.42	125.193
	13.92	185.158	217.779	124.545
	13.93	185.951	216.947	124.079
	13.94	186.713	216.093	123.898
	13.95	187.379	215.417	124.055
	13.96	187.903	215.109	124.547
	13.97	188.266	215.305	125.312
	13.98	188.476	216.035	126.231
	13.99	188.566	217.199	127.148
	14	188.594	218.587	127.894
	14.01	188.622	219.932	128.329
	14.02	188.685	220.993	128.38
	14.03	188.76	221.635	128.066
	14.04	188.755	221.865	127.495
	14.05	188.527	221.816	126.83
	14.06	187.943	221.684	126.245
	14.07	186.946	221.645	125.877
	14.08	185.612	221.796	125.805
	14.09	184.154	222.138	126.044
	14.1	182.867	222.603	126.56
	14.11	182.042	223.102	127.288
	14.12	181.864	223.568	128.154
	14.13	182.353	223.969	129.08
	14.14	183.362	224.293	129.997
	14.15	184.63	224.516	130.844
	14.16	185.873	224.584	131.565
	14.17	186.865	224.411	132.113
	14.18	187.495	223.904	132.458
	14.19	187.766	223.003	132.599
	14.2	187.763	221.725	132.571
	14.21	187.596	220.185	132.442
	14.22	187.35	218.586	132.301
	14.23	187.06	217.179	132.226
	14.24	186.724	216.197	132.259
	14.25	186.33	215.804	132.4
	14.26	185.877	216.053	132.61
	14.27	185.39	216.885	132.834
	14.28	184.89	218.161	133.017
	14.29	184.385	219.698	133.114
	14.3	183.856	221.314	133.09
	14.31	183.275	222.852	132.912
	14.32	182.646	224.188	132.555
	14.33	182.02	225.224	132.019
	14.34	181.495	225.885	131.343
	14.35	181.194	226.108	130.614
	14.36	181.212	225.844	129.953
	14.37	181.593	225.071	129.479
	14.38	182.31	223.81	129.27
	14.39	183.277	222.135	129.326
	14.4	184.37	220.184	129.571
	14.41	185.449	218.151	129.879
	14.42	186.374	216.258	130.109
	14.43	187.011	214.713	130.156
	14.44	187.248	213.674	129.966
	14.45	187.012	213.207	129.549
	14.46	186.289	213.288	128.969
	14.47	185.14	213.822	128.325
	14.48	183.696	214.674	127.732
	14.49	182.139	215.702	127.296
	14.5	180.661	216.768	127.086
	14.51	179.427	217.735	127.111
	14.52	178.55	218.473	127.312
	14.53	178.081	218.883	127.571
	14.54	178.025	218.943	127.75
	14.55	178.373	218.733	127.745
	14.56	179.118	218.423	127.529
	14.57	180.258	218.215	127.164
	14.58	181.77	218.262	126.776
	14.59	183.579	218.605	126.503
	14.6	185.538	219.167	126.449
	14.61	187.446	219.801	126.655
	14.62	189.103	220.36	127.101
	14.63	190.364	220.747	127.723
	14.64	191.186	220.935	128.436
	14.65	191.615	220.954	129.158
	14.66	191.747	220.861	129.83
	14.67	191.675	220.723	130.429
	14.68	191.449	220.617	130.971
	14.69	191.074	220.625	131.501
	14.7	190.534	220.828	132.054
	14.71	189.822	221.283	132.622
	14.72	188.955	221.986	133.136
	14.73	187.958	222.865	133.481
	14.74	186.854	223.783	133.537
	14.75	185.652	224.586	133.228
	14.76	184.363	225.151	132.555
	14.77	183.025	225.427	131.591
	14.78	181.718	225.438	130.454
	14.79	180.56	225.254	129.266
	14.8	179.675	224.952	128.133
	14.81	179.161	224.573	127.148
	14.82	179.062	224.122	126.399
	14.83	179.366	223.591	125.973
	14.84	180.008	223.004	125.926
	14.85	180.892	222.437	126.241
	14.86	181.905	222.012	126.796
	14.87	182.93	221.853	127.373
	14.88	183.856	222.022	127.714
	14.89	184.579	222.472	127.614
	14.9	185.014	223.046	127.005
	14.91	185.103	223.522	125.987
	14.92	184.835	223.696	124.793
	14.93	184.256	223.448	123.699
	14.94	183.481	222.788	122.925
	14.95	182.668	221.841	122.573
	14.96	181.977	220.805	122.623
	14.97	181.515	219.899	122.979
	14.98	181.292	219.317	123.524
	14.99	181.217	219.201	124.166
	15	181.126	219.613	124.844
	15.01	180.851	220.525	125.517
	15.02	180.29	221.808	126.154
	15.03	179.455	223.252	126.729
	15.04	178.488	224.62	127.243
	15.05	177.623	225.719	127.717
	15.06	177.118	226.451	128.19
	15.07	177.184	226.835	128.682
	15.08	177.926	226.967	129.171
	15.09	179.316	226.955	129.593
	15.1	181.199	226.859	129.862
	15.11	183.328	226.662	129.921
	15.12	185.404	226.292	129.776
	15.13	187.134	225.662	129.495
	15.14	188.27	224.723	129.175
	15.15	188.659	223.491	128.887
	15.16	188.268	222.044	128.644
	15.17	187.185	220.506	128.396
	15.18	185.603	219.014	128.075
	15.19	183.765	217.695	127.643
	15.2	181.909	216.65	127.133
	15.21	180.221	215.941	126.642
	15.22	178.808	215.592	126.307
	15.23	177.71	215.588	126.254
	15.24	176.925	215.884	126.56
	15.25	176.442	216.418	127.236
	15.26	176.25	217.111	128.217
	15.27	176.342	217.863	129.375
	15.28	176.686	218.546	130.54
	15.29	177.221	218.997	131.539
	15.3	177.856	219.053	132.229
	15.31	178.5	218.6	132.539
	15.32	179.092	217.635	132.486
	15.33	179.624	216.303	132.169
	15.34	180.128	214.878	131.737
	15.35	180.654	213.691	131.347
	15.36	181.231	213.026	131.124
	15.37	181.848	213.038	131.125
	15.38	182.454	213.708	131.334
	15.39	182.975	214.875	131.673
	15.4	183.346	216.296	132.038
	15.41	183.53	217.719	132.338
	15.42	183.534	218.937	132.529
	15.43	183.4	219.81	132.62
	15.44	183.194	220.275	132.656
	15.45	182.984	220.344	132.686
	15.46	182.83	220.111	132.729
	15.47	182.761	219.738	132.765
	15.48	182.771	219.43	132.741
	15.49	182.812	219.375	132.597
	15.5	182.801	219.682	132.292
	15.51	182.632	220.346	131.821
	15.52	182.219	221.245	131.222
	15.53	181.535	222.193	130.559
	15.54	180.643	223.014	129.913
	15.55	179.693	223.592	129.355
	15.56	178.876	223.895	128.939
	15.57	178.354	223.937	128.7
	15.58	178.19	223.741	128.648
	15.59	178.334	223.305	128.762
	15.6	178.646	222.614	128.982
	15.61	178.976	221.675	129.207
	15.62	179.222	220.552	129.321
	15.63	179.366	219.371	129.223
	15.64	179.449	218.282	128.879
	15.65	179.525	217.402	128.339
	15.66	179.605	216.766	127.734
	15.67	179.651	216.319	127.232
	15.68	179.596	215.941	126.981
	15.69	179.392	215.507	127.053
	15.7	179.048	214.925	127.417
	15.71	178.633	214.168	127.939
	15.72	178.251	213.27	128.425
	15.73	177.998	212.311	128.68
	15.74	177.93	211.393	128.563
	15.75	178.047	210.62	128.028
	15.76	178.306	210.07	127.132
	15.77	178.64	209.772	126.009
	15.78	178.982	209.694	124.829
	15.79	179.292	209.749	123.761
	15.8	179.568	209.829	122.939
	15.81	179.852	209.848	122.447
	15.82	180.201	209.784	122.317
	15.83	180.656	209.685	122.518
	15.84	181.206	209.651	122.961
	15.85	181.781	209.79	123.502
	15.86	182.282	210.176	123.977
	15.87	182.627	210.825	124.24
	15.88	182.798	211.697	124.222
	15.89	182.845	212.713	123.959
	15.9	182.848	213.774	123.582
	15.91	182.865	214.783	123.265
	15.92	182.884	215.654	123.156
	15.93	182.822	216.327	123.318
	15.94	182.573	216.783	123.719
	15.95	182.071	217.041	124.256
	15.96	181.336	217.149	124.811
	15.97	180.484	217.155	125.294
	15.98	179.687	217.079	125.666
	15.99	179.105	216.896	125.928
	16	178.837	216.56	126.103
	16.01	178.88	216.049	126.224
	16.02	179.142	215.406	126.327
	16.03	179.476	214.763	126.464
	16.04	179.735	214.303	126.703
	16.05	179.828	214.2	127.115
	16.06	179.753	214.545	127.747
	16.07	179.59	215.301	128.588
	16.08	179.467	216.306	129.546
	16.09	179.496	217.322	130.457
	16.1	179.724	218.108	131.119
	16.11	180.112	218.487	131.352
	16.12	180.559	218.395	131.053
	16.13	180.957	217.882	130.237
	16.14	181.234	217.089	129.035
	16.15	181.377	216.196	127.65
	16.16	181.412	215.362	126.299
	16.17	181.37	214.683	125.157
	16.18	181.252	214.163	124.315
	16.19	181.022	213.726	123.789
	16.2	180.633	213.261	123.535
	16.21	180.058	212.685	123.496
	16.22	179.313	212.004	123.63
	16.23	178.449	211.327	123.926
	16.24	177.522	210.84	124.396
	16.25	176.557	210.725	125.053
	16.26	175.532	211.077	125.898
	16.27	174.394	211.855	126.902
	16.28	173.103	212.882	128.013
	16.29	171.673	213.909	129.164
	16.3	170.197	214.705	130.274
	16.31	168.832	215.143	131.257
	16.32	167.749	215.234	132.021
	16.33	167.083	215.128	132.485
	16.34	166.894	215.055	132.598
	16.35	167.155	215.252	132.36
	16.36	167.774	215.878	131.823
	16.37	168.625	216.96	131.087
	16.38	169.583	218.363	130.265
	16.39	170.549	219.827	129.46
	16.4	171.46	221.041	128.743
	16.41	172.275	221.737	128.152
	16.42	172.957	221.773	127.707
	16.43	173.453	221.164	127.433
	16.44	173.69	220.058	127.367
	16.45	173.608	218.68	127.554
	16.46	173.205	217.26	128.017
	16.47	172.586	215.987	128.724
	16.48	171.961	214.983	129.569
	16.49	171.606	214.307	130.392
	16.5	171.773	213.958	131.03
	16.51	172.606	213.894	131.381
	16.52	174.088	214.049	131.452
	16.53	176.054	214.362	131.352
	16.54	178.252	214.802	131.257
	16.55	180.424	215.382	131.33
	16.56	182.365	216.136	131.665
	16.57	183.944	217.085	132.255
	16.58	185.091	218.194	133
	16.59	185.778	219.352	133.761
	16.6	186.013	220.394	134.405
	16.61	185.847	221.15	134.849
	16.62	185.383	221.512	135.068
	16.63	184.768	221.47	135.082
	16.64	184.164	221.121	134.931
	16.65	183.709	220.637	134.659
	16.66	183.488	220.217	134.3
	16.67	183.52	220.032	133.881
	16.68	183.769	220.187	133.424
	16.69	184.165	220.705	132.944
	16.7	184.617	221.529	132.459
	16.71	185.028	222.536	131.981
	16.72	185.31	223.564	131.521
	16.73	185.396	224.444	131.091
	16.74	185.252	225.023	130.7
	16.75	184.887	225.193	130.366
	16.76	184.344	224.916	130.113
	16.77	183.689	224.233	129.962
	16.78	182.992	223.274	129.929
	16.79	182.318	222.227	130.003
	16.8	181.723	221.293	130.15
	16.81	181.241	220.628	130.316
	16.82	180.885	220.289	130.447
	16.83	180.641	220.217	130.506
	16.84	180.463	220.266	130.479
	16.85	180.293	220.26	130.378
	16.86	180.081	220.07	130.229
	16.87	179.813	219.666	130.067
	16.88	179.52	219.13	129.934
	16.89	179.272	218.621	129.878
	16.9	179.152	218.322	129.951
	16.91	179.227	218.362	130.185
	16.92	179.523	218.782	130.575
	16.93	180.015	219.515	131.055
	16.94	180.641	220.415	131.501
	16.95	181.313	221.298	131.753
	16.96	181.939	221.986	131.669
	16.97	182.428	222.343	131.175
	16.98	182.698	222.285	130.3
	16.99	182.686	221.786	129.18
	17	182.363	220.872	128.015
	17.01	181.751	219.621	127.013
	17.02	180.931	218.15	126.318
	17.03	180.041	216.608	125.972
	17.04	179.233	215.155	125.908
	17.05	178.638	213.94	125.984
	17.06	178.321	213.077	126.041
	17.07	178.266	212.627	125.965
	17.08	178.382	212.583	125.73
	17.09	178.535	212.868	125.394
	17.1	178.586	213.337	125.072
	17.11	178.437	213.807	124.871
	17.12	178.052	214.111	124.838
	17.13	177.467	214.154	124.937
	17.14	176.771	213.957	125.058
	17.15	176.077	213.66	125.071
	17.16	175.485	213.474	124.875
	17.17	175.059	213.605	124.438
	17.18	174.825	214.179	123.81
	17.19	174.776	215.198	123.1
	17.2	174.891	216.538	122.449
	17.21	175.147	217.988	121.993
	17.22	175.517	219.297	121.85
	17.23	175.965	220.226	122.1
	17.24	176.446	220.582	122.781
	17.25	176.904	220.247	123.881
	17.26	177.273	219.202	125.331
	17.27	177.482	217.548	127
	17.28	177.457	215.507	128.706
	17.29	177.126	213.402	130.239
	17.3	176.445	211.598	131.411
	17.31	175.415	210.421	132.106
	17.32	174.104	210.069	132.321
	17.33	172.635	210.563	132.173
	17.34	171.17	211.736	131.868
	17.35	169.873	213.296	131.628
	17.36	168.878	214.915	131.61
	17.37	168.266	216.336	131.841
	17.38	168.059	217.432	132.207
	17.39	168.223	218.214	132.497
	17.4	168.675	218.783	132.497
	17.41	169.303	219.252	132.08
	17.42	169.979	219.685	131.26
	17.43	170.584	220.069	130.177
	17.44	171.013	220.344	129.037
	17.45	171.187	220.44	128.025
	17.46	171.052	220.319	127.249
	17.47	170.58	219.979	126.723
	17.48	169.786	219.437	126.398
	17.49	168.733	218.701	126.2
	17.5	167.538	217.77	126.06
	17.51	166.362	216.655	125.921
	17.52	165.384	215.409	125.731
	17.53	164.76	214.148	125.445
	17.54	164.584	213.027	125.048
	17.55	164.861	212.199	124.569
	17.56	165.497	211.761	124.092
	17.57	166.337	211.727	123.737
	17.58	167.213	212.038	123.619
	17.59	168.014	212.594	123.814
	17.6	168.724	213.303	124.344
	17.61	169.419	214.102	125.178
	17.62	170.223	214.954	126.252
	17.63	171.229	215.825	127.477
	17.64	172.438	216.654	128.74
	17.65	173.746	217.36	129.906
	17.66	174.976	217.864	130.833
	17.67	175.952	218.138	131.405
	17.68	176.57	218.238	131.576
	17.69	176.84	218.289	131.385
	17.7	176.879	218.435	130.954
	17.71	176.858	218.747	130.436
	17.72	176.928	219.165	129.957
	17.73	177.164	219.491	129.562
	17.74	177.531	219.462	129.214
	17.75	177.911	218.868	128.823
	17.76	178.143	217.664	128.315
	17.77	178.091	216.005	127.701
	17.78	177.678	214.197	127.104
	17.79	176.916	212.567	126.741
	17.8	175.895	211.338	126.842
	17.81	174.767	210.555	127.554
	17.82	173.713	210.109	128.856
	17.83	172.91	209.824	130.531
	17.84	172.495	209.564	132.212
	17.85	172.537	209.292	133.482
	17.86	173.013	209.066	134.009
	17.87	173.823	208.982	133.653
	17.88	174.817	209.105	132.514
	17.89	175.84	209.435	130.899
	17.9	176.773	209.909	129.215
	17.91	177.545	210.44	127.847
	17.92	178.127	210.956	127.038
	17.93	178.507	211.424	126.837
	17.94	178.671	211.844	127.121
	17.95	178.597	212.222	127.657
	17.96	178.271	212.561	128.194
	17.97	177.709	212.847	128.531
	17.98	176.964	213.066	128.553
	17.99	176.119	213.215	128.248
	18	175.248	213.312	127.698
	18.01	174.39	213.392	127.058
	18.02	173.542	213.493	126.515
	18.03	172.678	213.646	126.237
	18.04	171.792	213.861	126.319
	18.05	170.929	214.132	126.759
	18.06	170.174	214.443	127.465
	18.07	169.619	214.773	128.296
	18.08	169.307	215.106	129.124
	18.09	169.209	215.423	129.87
	18.1	169.223	215.705	130.528
	18.11	169.228	215.921	131.132
	18.12	169.138	216.039	131.728
	18.13	168.948	216.036	132.327
	18.14	168.737	215.911	132.892
	18.15	168.632	215.693	133.34
	18.16	168.746	215.427	133.573
	18.17	169.121	215.159	133.506
	18.18	169.688	214.916	133.103
	18.19	170.283	214.699	132.388
	18.2	170.701	214.497	131.452
	18.21	170.777	214.302	130.425
	18.22	170.454	214.115	129.446
	18.23	169.825	213.942	128.624
	18.24	169.111	213.779	128.015
	18.25	168.598	213.597	127.612
	18.26	168.543	213.346	127.364
	18.27	169.085	212.983	127.205
	18.28	170.19	212.497	127.092
	18.29	171.657	211.924	127.019
	18.3	173.184	211.338	127.007
	18.31	174.467	210.825	127.089
	18.32	175.297	210.447	127.286
	18.33	175.622	210.226	127.606
	18.34	175.543	210.145	128.049
	18.35	175.259	210.166	128.618
	18.36	174.986	210.251	129.316
	18.37	174.892	210.373	130.127
	18.38	175.067	210.517	130.996
	18.39	175.514	210.678	131.823
	18.4	176.182	210.857	132.485
	18.41	176.982	211.072	132.873
	18.42	177.81	211.351	132.928
	18.43	178.563	211.723	132.657
	18.44	179.157	212.199	132.126
	18.45	179.549	212.749	131.429
	18.46	179.749	213.305	130.666
	18.47	179.813	213.784	129.921
	18.48	179.82	214.137	129.258
	18.49	179.836	214.378	128.72
	18.5	179.881	214.594	128.335
	18.51	179.922	214.903	128.117
	18.52	179.888	215.397	128.062
	18.53	179.704	216.091	128.15
	18.54	179.325	216.907	128.341
	18.55	178.763	217.693	128.577
	18.56	178.087	218.276	128.788
	18.57	177.399	218.509	128.906
	18.58	176.804	218.307	128.876
	18.59	176.372	217.674	128.673
	18.6	176.127	216.704	128.306
	18.61	176.067	215.588	127.815
	18.62	176.192	214.579	127.256
	18.63	176.532	213.94	126.682
	18.64	177.15	213.862	126.125
	18.65	178.097	214.399	125.594
	18.66	179.357	215.436	125.075
	18.67	180.806	216.729	124.539
	18.68	182.219	217.993	123.948
	18.69	183.328	219.004	123.262
	18.7	183.924	219.655	122.457
	18.71	183.931	219.957	121.538
	18.72	183.448	219.988	120.561
	18.73	182.702	219.819	119.638
	18.74	181.963	219.472	118.92
	18.75	181.434	218.914	118.563
	18.76	181.191	218.093	118.682
	18.77	181.173	216.988	119.318
	18.78	181.239	215.643	120.426
	18.79	181.254	214.186	121.89
	18.8	181.146	212.804	123.546
	18.81	180.934	211.694	125.217
	18.82	180.69	211.007	126.735
	18.83	180.49	210.803	127.962
	18.84	180.356	211.033	128.801
	18.85	180.239	211.562	129.215
	18.86	180.034	212.213	129.234
	18.87	179.615	212.825	128.959
	18.88	178.896	213.287	128.54
	18.89	177.864	213.551	128.132
	18.9	176.601	213.626	127.848
	18.91	175.27	213.561	127.721
	18.92	174.072	213.43	127.699
	18.93	173.195	213.317	127.665
	18.94	172.767	213.303	127.495
	18.95	172.825	213.448	127.112
	18.96	173.317	213.779	126.528
	18.97	174.118	214.28	125.851
	18.98	175.054	214.895	125.251
	18.99	175.943	215.538	124.909
	19	176.629	216.113	124.95
	19.01	177.02	216.531	125.405
	19.02	177.119	216.738	126.204
	19.03	177.02	216.728	127.197
	19.04	176.886	216.545	128.199
	19.05	176.884	216.266	129.046
	19.06	177.134	215.979	129.628
	19.07	177.66	215.754	129.912
	19.08	178.398	215.627	129.944
	19.09	179.222	215.605	129.817
	19.1	179.986	215.676	129.641
	19.11	180.564	215.839	129.496
	19.12	180.861	216.112	129.404
	19.13	180.809	216.53	129.325
	19.14	180.365	217.123	129.188
	19.15	179.508	217.875	128.923
	19.16	178.259	218.706	128.5
	19.17	176.692	219.465	127.933
	19.18	174.943	219.965	127.263
	19.19	173.208	220.042	126.533
	19.2	171.713	219.607	125.766
	19.21	170.68	218.686	124.963
	19.22	170.29	217.413	124.123
	19.23	170.639	215.996	123.252
	19.24	171.729	214.662	122.377
	19.25	173.46	213.604	121.544
	19.26	175.647	212.951	120.804
	19.27	178.049	212.745	120.202
	19.28	180.411	212.95	119.758
	19.29	182.498	213.462	119.463
	19.3	184.139	214.143	119.279
	19.31	185.243	214.85	119.162
	19.32	185.797	215.48	119.094
	19.33	185.848	215.995	119.117
	19.34	185.463	216.439	119.34
	19.35	184.718	216.921	119.916
	19.36	183.695	217.581	120.975
	19.37	182.503	218.525	122.567
	19.38	181.286	219.782	124.608
	19.39	180.211	221.267	126.884
	19.4	179.426	222.784	129.102
	19.41	179.005	224.073	130.968
	19.42	178.91	224.877	132.279
	19.43	178.995	225.025	132.97
	19.44	179.054	224.475	133.129
	19.45	178.897	223.33	132.943
	19.46	178.428	221.796	132.629
	19.47	177.69	220.116	132.354
	19.48	176.855	218.506	132.184
	19.49	176.167	217.101	132.075
	19.5	175.848	215.948	131.907
	19.51	176.011	215.026	131.551
	19.52	176.618	214.282	130.928
	19.53	177.49	213.664	130.057
	19.54	178.37	213.142	129.053
	19.55	179.015	212.706	128.099
	19.56	179.269	212.358	127.386
	19.57	179.102	212.093	127.043
	19.58	178.598	211.889	127.09
	19.59	177.908	211.716	127.421
	19.6	177.191	211.553	127.841
	19.61	176.57	211.413	128.133
	19.62	176.108	211.363	128.135
	19.63	175.821	211.514	127.805
	19.64	175.699	211.978	127.225
	19.65	175.74	212.816	126.564
	19.66	175.958	213.984	126.002
	19.67	176.378	215.333	125.664
	19.68	177.017	216.641	125.575
	19.69	177.863	217.692	125.667
	19.7	178.869	218.353	125.833
	19.71	179.952	218.608	125.985
	19.72	181.015	218.543	126.099
	19.73	181.962	218.293	126.22
	19.74	182.714	217.978	126.426
	19.75	183.221	217.662	126.773
	19.76	183.469	217.365	127.258
	19.77	183.477	217.094	127.818
	19.78	183.298	216.877	128.361
	19.79	183.006	216.773	128.805
	19.8	182.686	216.853	129.104
	19.81	182.414	217.158	129.25
	19.82	182.244	217.669	129.254
	19.83	182.182	218.289	129.112
	19.84	182.183	218.865	128.792
	19.85	182.157	219.237	128.243
	19.86	182.001	219.288	127.42
	19.87	181.628	218.991	126.33
	19.88	181.009	218.418	125.06
	19.89	180.163	217.719	123.78
	19.9	179.146	217.062	122.708
	19.91	178.017	216.58	122.046
	19.92	176.826	216.332	121.917
	19.93	175.631	216.309	122.326
	19.94	174.523	216.467	123.154
	19.95	173.643	216.765	124.203
	19.96	173.165	217.195	125.246
[truncated: 118,003 more rows]

## Sheet: Fig 3B
		Current at -50 mV
	Cell ID	control	CBD	XE-991	CBD/con	XE-991/CBD
	21513050	92.8078	119.205	4.77794	1.28443	0.0514821
	21513088	110.843	116.631	82.4423	1.05222	0.743778
	21517082	132.896	167.136	139.034	1.25765	1.04619
	21603029	160.178	196.066	162.141	1.22405	1.01226
	21604025	145.264	240.899		1.65836
	21706012	91.6928	124.945	91.553	1.36265	0.998475
	21706028	30.4546	74.5253	34.3649	2.44709	1.1284
	21706043	133.268	172.551		1.29476
	21706060	104.1	160.726		1.54395
	21706075	99.9041	156.847	159.229	1.56998	1.59382
	21706093	144.532	136.689		0.945738
	21713031	42.6902	50.547	24.1452	1.18404	0.565591
	21713040	124.428	139.255	64.2121	1.11916	0.516057
	21714005	84.4817	73.7254	73.9203	0.872678	0.874986
	21714028	72.1999	108.252	52.5661	1.49934	0.728063
	21714031	28.9693	17.9702	15.7192	0.620318	0.542615
	21714035	44.5058	94.2771	59.233	2.11831	1.3309
	21714039	81.6435	123.219	100.12	1.50923	1.22631
	21714066	132.772	128.661	94.056	0.96904	0.708405
	21714028	103.175	122.631		1.18858
				Mean	1.33608	0.871155
				Median	1.27104	0.874986
				SD	0.417705	0.383141
				SEM	0.0934017	0.0989265
				n	20	15
			0.000173373	0.0003806
			paired t-test ( two-tailed)

## Sheet: Fig 3C
		Control	1 uM CBD	CBD+XE-991
	File	21707030I014	21707033I009	21707033I070
	Time (ms)	Curr (pA)	Curr (pA)	Curr (pA)
	0	447.388	328.369	320.435
	0.01	448.608	330.2	320.435
	0.02	451.05	334.473	322.266
	0.03	455.933	338.135	325.928
	0.04	458.374	339.966	325.928
	0.05	459.595	338.135	329.59
	0.06	457.153	338.135	335.083
	0.07	451.05	340.576	332.031
	0.08	449.219	343.018	328.369
	0.09	446.777	344.849	323.486
	0.1	448.608	343.628	317.993
	0.11	448.608	338.745	312.5
	0.12	444.946	337.524	311.279
	0.13	446.777	337.524	314.941
	0.14	445.557	329.59	321.045
	0.15	447.388	326.538	325.928
	0.16	449.219	326.538	329.59
	0.17	450.439	327.148	330.2
	0.18	452.881	330.811	326.538
	0.19	448.608	333.252	322.266
	0.2	445.557	335.083	321.655
	0.21	446.777	333.862	321.045
	0.22	447.388	335.083	319.824
	0.23	449.829	338.135	317.383
	0.24	447.998	337.524	316.162
	0.25	440.674	332.642	316.772
	0.26	437.622	330.2	322.876
	0.27	442.505	332.031	329.59
	0.28	446.167	332.031	328.369
	0.29	448.608	333.862	326.538
	0.3	445.557	333.862	324.707
	0.31	444.336	336.914	322.876
	0.32	444.336	335.083	322.876
	0.33	448.608	338.135	319.824
	0.34	459.595	336.914	321.045
	0.35	462.646	339.355	322.266
	0.36	457.153	340.576	324.097
	0.37	453.491	339.966	325.317
	0.38	452.27	335.693	323.486
	0.39	453.491	331.421	326.538
	0.4	454.102	332.031	329.59
	0.41	450.439	335.083	330.811
	0.42	446.167	339.355	330.2
	0.43	447.388	340.576	327.759
	0.44	449.829	339.355	323.486
	0.45	451.05	336.304	318.604
	0.46	447.998	332.031	319.824
	0.47	447.998	332.031	324.097
	0.48	450.439	330.811	327.148
	0.49	448.608	328.979	325.317
	0.5	443.726	330.2	319.824
	0.51	445.557	333.252	316.772
	0.52	446.167	336.304	322.876
	0.53	446.777	340.576	325.317
	0.54	449.219	341.187	325.317
	0.55	449.219	338.745	324.707
	0.56	446.167	334.473	323.486
	0.57	446.167	333.862	325.317
	0.58	450.439	334.473	324.097
	0.59	453.491	336.304	319.824
	0.6	456.543	337.524	317.383
	0.61	451.66	336.304	314.331
	0.62	447.998	333.252	311.279
	0.63	444.336	331.421	313.11
	0.64	443.726	335.693	311.89
	0.65	448.608	340.576	314.331
	0.66	451.66	340.576	313.721
	0.67	454.712	336.304	318.604
	0.68	454.102	334.473	318.604
	0.69	450.439	331.421	317.993
	0.7	444.946	330.811	314.941
	0.71	444.946	333.252	316.772
	0.72	449.219	338.135	319.214
	0.73	454.102	342.407	319.824
	0.74	454.712	346.069	318.604
	0.75	449.829	346.069	315.552
	0.76	445.557	341.797	308.838
	0.77	443.726	338.745	308.838
	0.78	447.998	341.187	313.721
	0.79	452.881	341.187	316.162
	0.8	448.608	335.693	319.214
	0.81	446.777	333.862	319.824
	0.82	446.777	333.252	321.045
	0.83	445.557	328.369	322.876
	0.84	444.946	325.928	324.707
	0.85	447.388	330.2	324.707
	0.86	449.219	333.252	321.655
	0.87	452.881	335.083	315.552
	0.88	455.933	337.524	313.11
	0.89	452.27	335.693	310.669
	0.9	448.608	333.862	313.11
	0.91	448.608	331.421	320.435
	0.92	449.829	331.421	325.317
	0.93	455.933	330.2	324.097
	0.94	454.712	329.59	319.824
	0.95	452.881	328.979	316.772
	0.96	451.66	327.148	316.772
	0.97	451.05	326.538	316.162
	0.98	449.829	325.317	321.045
	0.99	451.05	322.876	325.317
	1	448.608	321.655	322.266
	1.01	444.946	324.707	316.772
	1.02	443.115	326.538	317.383
	1.03	441.895	328.369	321.655
	1.04	443.726	328.369	324.097
	1.05	442.505	327.759	323.486
	1.06	446.167	327.759	321.655
	1.07	450.439	329.59	322.266
	1.08	451.05	335.083	319.824
	1.09	444.946	339.355	317.383
	1.1	441.284	344.238	317.383
	1.11	440.674	345.459	316.162
	1.12	443.726	342.407	317.383
	1.13	447.998	337.524	318.604
	1.14	449.829	332.642	323.486
	1.15	449.219	328.979	327.148
	1.16	450.439	333.862	322.266
	1.17	451.05	334.473	317.993
	1.18	451.66	335.693	318.604
	1.19	451.66	335.693	321.655
	1.2	449.219	332.642	321.045
	1.21	447.998	327.148	316.162
	1.22	447.998	324.707	314.941
	1.23	451.66	327.148	317.993
	1.24	452.27	330.811	322.266
	1.25	452.27	335.693	323.486
	1.26	452.27	335.083	319.824
	1.27	449.219	332.642	319.824
	1.28	445.557	329.59	323.486
	1.29	441.895	330.2	329.59
	1.3	437.622	330.811	329.59
	1.31	438.232	332.031	322.876
	1.32	440.674	336.304	321.045
	1.33	442.505	336.304	317.383
	1.34	446.167	334.473	317.993
	1.35	445.557	335.083	317.993
	1.36	440.674	333.862	322.876
	1.37	438.843	335.083	320.435
	1.38	441.895	335.083	316.162
	1.39	444.946	334.473	310.669
	1.4	447.998	333.862	311.279
	1.41	444.336	332.031	310.669
	1.42	443.726	334.473	314.331
	1.43	441.895	339.355	312.5
	1.44	439.453	343.628	312.5
	1.45	440.674	340.576	314.941
	1.46	441.284	336.914	316.772
	1.47	443.115	332.031	319.214
	1.48	449.219	330.2	319.214
	1.49	449.829	332.031	320.435
	1.5	450.439	336.914	317.993
	1.51	447.388	342.407	317.383
	1.52	440.674	341.187	318.604
	1.53	436.401	336.914	321.655
	1.54	438.843	335.083	322.876
	1.55	443.726	333.252	321.655
	1.56	447.388	335.083	322.266
	1.57	447.998	333.252	325.317
	1.58	445.557	331.421	322.876
	1.59	444.946	330.811	317.383
	1.6	447.388	330.811	313.11
	1.61	447.388	330.811	312.5
	1.62	447.998	327.759	316.772
	1.63	444.946	328.369	319.214
	1.64	444.336	326.538	319.824
	1.65	441.895	329.59	321.655
	1.66	443.726	327.148	323.486
	1.67	451.05	322.266	321.655
	1.68	454.712	322.266	319.824
	1.69	451.66	326.538	317.993
	1.7	446.777	330.2	317.993
	1.71	444.946	334.473	318.604
	1.72	444.946	336.304	322.266
	1.73	447.388	338.745	324.097
	1.74	447.998	341.187	324.097
	1.75	447.388	344.849	323.486
	1.76	449.219	346.069	319.214
	1.77	449.829	347.29	319.824
	1.78	451.05	347.29	319.214
	1.79	450.439	349.731	316.162
	1.8	449.219	347.29	313.11
	1.81	451.66	344.849	312.5
	1.82	450.439	340.576	316.162
	1.83	449.219	336.914	320.435
	1.84	449.829	333.252	321.045
	1.85	447.388	335.693	322.876
	1.86	444.946	335.083	325.317
	1.87	449.829	335.693	327.148
	1.88	451.66	335.693	325.317
	1.89	451.66	338.745	323.486
	1.9	452.881	341.797	323.486
	1.91	454.102	340.576	322.266
	1.92	454.102	337.524	321.045
	1.93	449.219	333.252	323.486
	1.94	446.167	330.811	325.928
	1.95	444.946	332.031	327.148
	1.96	444.946	335.693	325.928
	1.97	447.388	336.304	321.655
	1.98	449.829	335.693	321.045
	1.99	448.608	333.862	321.045
	2	447.388	333.862	324.707
	2.01	449.219	330.2	324.707
	2.02	447.998	324.707	320.435
	2.03	449.829	322.266	317.993
	2.04	451.66	324.707	317.993
	2.05	451.05	327.759	316.162
	2.06	450.439	329.59	311.89
	2.07	450.439	333.252	312.5
	2.08	451.66	336.914	314.331
	2.09	451.05	335.693	317.383
	2.1	447.388	330.2	316.162
	2.11	450.439	331.421	314.941
	2.12	454.712	336.304	316.772
	2.13	452.881	337.524	315.552
	2.14	447.388	333.252	315.552
	2.15	444.336	330.2	316.162
	2.16	444.336	329.59	316.772
	2.17	445.557	333.252	321.045
	2.18	443.115	334.473	318.604
	2.19	445.557	333.252	315.552
	2.2	449.829	336.914	315.552
	2.21	451.05	339.966	314.941
	2.22	451.66	332.031	318.604
	2.23	454.102	327.148	320.435
	2.24	450.439	325.317	319.214
	2.25	453.491	330.811	318.604
	2.26	455.322	330.811	320.435
	2.27	448.608	333.252	320.435
	2.28	447.998	331.421	318.604
	2.29	451.66	329.59	318.604
	2.3	451.66	328.369	317.383
	2.31	449.219	328.369	317.383
	2.32	446.777	331.421	317.993
	2.33	447.388	332.642	318.604
	2.34	447.998	335.693	319.214
	2.35	449.829	338.745	319.214
	2.36	454.102	344.238	316.162
	2.37	455.322	347.9	314.941
	2.38	454.102	347.29	313.721
	2.39	457.153	344.849	317.383
	2.4	454.712	341.187	317.383
	2.41	454.712	341.797	315.552
	2.42	453.491	344.238	315.552
	2.43	449.829	342.407	314.331
	2.44	447.388	338.745	314.331
	2.45	447.388	336.914	317.383
	2.46	447.998	335.693	319.214
	2.47	447.388	334.473	316.772
	2.48	443.115	330.2	314.941
	2.49	443.115	330.2	316.772
	2.5	446.167	329.59	323.486
	2.51	448.608	326.538	325.928
	2.52	449.829	330.2	323.486
	2.53	449.219	334.473	319.824
	2.54	448.608	336.914	317.383
	2.55	448.608	337.524	319.214
	2.56	447.998	335.083	319.824
	2.57	446.167	333.252	316.162
	2.58	444.946	338.745	314.941
	2.59	446.777	336.914	316.772
	2.6	445.557	333.862	319.824
	2.61	442.505	326.538	317.993
	2.62	438.843	325.317	317.383
	2.63	436.401	325.928	317.993
	2.64	438.843	327.759	319.214
	2.65	440.063	332.031	320.435
	2.66	443.115	336.914	320.435
	2.67	446.167	340.576	321.655
	2.68	447.998	339.966	324.097
	2.69	449.829	339.355	324.707
	2.7	451.66	338.135	323.486
	2.71	450.439	335.693	320.435
	2.72	449.219	333.862	321.655
	2.73	445.557	335.083	324.097
	2.74	441.895	335.693	320.435
	2.75	440.674	339.966	316.772
	2.76	444.946	341.797	314.941
	2.77	446.167	341.797	313.721
	2.78	446.167	341.187	315.552
	2.79	445.557	340.576	316.162
	2.8	447.388	341.187	317.383
	2.81	449.829	341.797	321.655
	2.82	453.491	341.797	322.876
	2.83	457.153	341.187	325.317
	2.84	458.984	338.135	322.876
	2.85	453.491	333.252	319.214
	2.86	446.167	333.252	318.604
	2.87	443.115	334.473	314.941
	2.88	447.388	335.693	313.721
	2.89	448.608	335.693	316.772
	2.9	445.557	336.914	317.383
	2.91	438.843	339.966	316.772
	2.92	440.674	343.628	316.162
	2.93	447.388	343.018	317.993
	2.94	454.102	339.966	322.266
	2.95	457.764	339.966	325.317
	2.96	460.815	342.407	322.876
	2.97	454.712	343.018	317.993
	2.98	447.998	341.797	311.279
	2.99	445.557	339.355	313.11
	3	446.167	338.135	314.331
	3.01	448.608	337.524	316.772
	3.02	449.829	336.914	320.435
	3.03	449.829	335.083	324.097
	3.04	451.66	335.083	325.317
	3.05	452.881	341.187	326.538
	3.06	455.322	345.459	325.928
	3.07	454.102	346.069	321.655
	3.08	448.608	344.238	320.435
	3.09	447.998	344.238	319.824
	3.1	447.388	343.628	319.824
	3.11	451.05	344.238	317.383
	3.12	452.881	346.68	314.331
	3.13	454.102	349.121	311.89
	3.14	449.829	344.238	313.11
	3.15	448.608	335.083	317.383
	3.16	444.336	333.252	317.993
	3.17	445.557	333.252	319.214
	3.18	447.998	336.304	321.045
	3.19	446.777	339.355	324.097
	3.2	445.557	341.187	321.655
	3.21	447.998	338.745	317.993
	3.22	450.439	333.862	319.824
	3.23	454.712	332.031	322.876
	3.24	457.764	332.642	322.876
	3.25	458.374	335.693	322.266
	3.26	458.374	337.524	321.045
	3.27	463.257	335.083	321.655
	3.28	460.815	332.642	318.604
	3.29	454.102	337.524	318.604
	3.3	451.05	340.576	319.214
	3.31	447.998	344.238	320.435
	3.32	448.608	341.797	317.383
	3.33	449.829	336.304	316.772
	3.34	449.829	334.473	319.824
	3.35	451.66	333.862	321.655
	3.36	454.102	335.083	321.655
	3.37	455.933	338.745	317.993
	3.38	460.205	336.914	317.993
	3.39	462.646	335.693	322.266
	3.4	463.257	334.473	325.928
	3.41	461.426	335.083	324.097
	3.42	458.374	337.524	319.214
	3.43	459.595	338.135	314.941
	3.44	454.712	341.797	313.721
	3.45	451.66	341.797	314.331
	3.46	451.05	340.576	317.993
	3.47	454.102	337.524	322.876
	3.48	455.933	338.745	323.486
	3.49	455.322	339.966	319.214
	3.5	455.933	340.576	316.162
	3.51	462.036	336.304	316.772
	3.52	463.257	331.421	315.552
	3.53	459.595	336.304	317.993
	3.54	457.153	337.524	318.604
	3.55	453.491	338.135	323.486
	3.56	452.881	335.083	327.148
	3.57	451.66	334.473	328.369
	3.58	455.322	335.693	328.369
	3.59	457.764	335.693	322.876
	3.6	454.712	335.693	320.435
	3.61	451.05	335.693	317.993
	3.62	449.829	334.473	319.214
	3.63	449.829	335.693	323.486
	3.64	450.439	338.135	325.317
	3.65	449.219	335.693	328.369
	3.66	448.608	335.693	329.59
	3.67	449.829	339.966	322.876
	3.68	449.219	344.849	321.045
	3.69	452.27	346.68	319.824
	3.7	450.439	342.407	322.266
	3.71	449.829	339.355	323.486
	3.72	449.829	333.862	323.486
	3.73	453.491	327.148	321.655
	3.74	455.933	324.707	322.876
	3.75	460.815	326.538	327.148
	3.76	458.984	330.811	328.369
	3.77	454.712	334.473	327.148
	3.78	452.27	335.083	320.435
	3.79	451.05	335.083	316.772
	3.8	450.439	335.083	316.162
	3.81	455.322	338.135	317.383
	3.82	458.374	339.966	320.435
	3.83	459.595	333.862	320.435
	3.84	459.595	330.811	321.655
	3.85	457.764	328.979	321.655
	3.86	460.205	329.59	322.876
	3.87	465.088	333.252	321.655
	3.88	466.309	337.524	321.655
	3.89	461.426	339.966	320.435
	3.9	457.764	341.187	319.824
	3.91	454.712	340.576	322.876
	3.92	454.102	336.914	324.707
	3.93	452.881	336.304	325.317
	3.94	450.439	339.355	328.979
	3.95	450.439	340.576	329.59
	3.96	451.05	341.797	328.979
	3.97	452.27	337.524	327.759
	3.98	454.102	335.083	326.538
	3.99	455.322	332.642	327.148
	4	454.712	332.031	325.928
	4.01	452.27	332.031	323.486
	4.02	452.27	335.083	320.435
	4.03	455.933	336.914	318.604
	4.04	460.815	336.304	316.162
	4.05	458.984	337.524	317.993
	4.06	458.984	339.355	316.772
	4.07	455.933	341.797	317.993
	4.08	454.102	341.187	317.993
	4.09	454.712	336.914	319.824
	4.1	455.933	327.759	324.707
	4.11	455.933	330.2	328.979
	4.12	456.543	333.862	325.317
	4.13	457.153	336.304	315.552
	4.14	458.374	335.083	310.059
	4.15	456.543	330.811	308.838
	4.16	450.439	324.707	310.669
	4.17	447.388	322.266	316.162
	4.18	447.998	324.707	312.5
	4.19	451.05	330.811	313.11
	4.2	452.881	331.421	314.331
	4.21	452.27	332.031	316.772
	4.22	450.439	333.862	316.772
	4.23	454.102	337.524	316.162
	4.24	454.712	336.304	316.772
	4.25	451.05	335.693	314.941
	4.26	452.881	335.693	312.5
	4.27	451.66	336.914	314.331
	4.28	454.102	338.135	313.11
	4.29	457.153	333.862	314.331
	4.3	458.374	328.979	313.721
	4.31	461.426	325.928	313.721
	4.32	458.374	325.317	314.331
	4.33	453.491	328.369	319.824
	4.34	447.998	333.252	324.707
	4.35	447.388	337.524	323.486
	4.36	449.829	339.355	319.214
	4.37	455.933	337.524	313.11
	4.38	457.153	336.914	313.721
	4.39	454.712	335.693	319.214
	4.4	451.66	334.473	325.928
	4.41	447.388	332.031	329.59
	4.42	448.608	327.148	322.876
	4.43	444.336	324.097	317.993
	4.44	440.674	321.655	317.383
	4.45	441.895	321.045	318.604
	4.46	443.726	323.486	319.214
	4.47	447.388	325.317	316.162
	4.48	452.881	327.148	315.552
	4.49	457.153	330.2	320.435
	4.5	455.933	327.148	324.097
	4.51	452.881	327.148	322.876
	4.52	446.167	328.369	320.435
	4.53	444.946	329.59	318.604
	4.54	446.167	327.759	315.552
	4.55	446.777	327.759	314.331
	4.56	452.27	327.148	313.721
	4.57	453.491	328.979	315.552
	4.58	449.829	332.642	317.383
	4.59	447.998	333.862	320.435
	4.6	449.219	334.473	319.214
	4.61	450.439	333.862	321.045
	4.62	450.439	332.031	324.707
	4.63	454.102	330.811	324.097
	4.64	457.153	329.59	323.486
	4.65	457.764	329.59	319.824
	4.66	457.153	328.979	318.604
	4.67	454.712	331.421	319.214
	4.68	452.881	336.914	319.824
	4.69	450.439	339.966	322.876
	4.7	450.439	342.407	328.979
	4.71	451.66	343.628	330.811
	4.72	451.66	340.576	325.928
	4.73	453.491	338.135	324.097
	4.74	455.933	337.524	325.928
	4.75	458.374	336.304	325.317
	4.76	455.933	333.252	318.604
	4.77	451.66	333.252	314.941
	4.78	446.777	334.473	313.721
	4.79	446.777	333.862	316.772
	4.8	444.946	330.811	320.435
	4.81	444.946	330.811	318.604
	4.82	446.167	334.473	317.383
	4.83	444.946	334.473	317.993
	4.84	452.27	333.862	317.383
	4.85	457.764	332.031	321.045
	4.86	453.491	333.862	321.045
	4.87	451.05	332.031	321.045
	4.88	447.388	327.148	320.435
	4.89	446.167	328.369	317.993
	4.9	445.557	331.421	317.993
	4.91	445.557	336.304	317.993
	4.92	447.388	340.576	319.214
	4.93	450.439	342.407	322.266
	4.94	452.27	342.407	322.266
	4.95	451.05	340.576	316.162
	4.96	448.608	337.524	313.721
	4.97	449.219	332.642	315.552
	4.98	452.27	332.031	317.383
	4.99	447.998	335.083	320.435
	5	443.726	335.083	322.876
	5.01	441.895	333.862	324.097
	5.02	442.505	338.135	321.045
	5.03	445.557	347.29	316.162
	5.04	449.829	348.511	313.721
	5.05	447.388	344.238	317.383
	5.06	443.115	336.914	324.707
	5.07	433.96	336.304	330.2
	5.08	427.856	337.524	332.031
	5.09	430.298	338.745	325.928
	5.1	440.674	335.693	321.655
	5.11	451.05	334.473	317.993
	5.12	454.712	329.59	316.162
	5.13	452.27	327.759	316.772
	5.14	446.777	329.59	319.214
	5.15	444.336	333.862	321.045
	5.16	444.336	336.304	324.097
	5.17	447.388	337.524	322.266
	5.18	450.439	336.304	322.876
	5.19	449.219	337.524	322.876
	5.2	450.439	336.914	317.383
	5.21	453.491	336.914	316.162
	5.22	458.374	336.304	314.331
	5.23	457.764	333.862	316.772
	5.24	455.933	335.083	317.383
	5.25	453.491	334.473	320.435
	5.26	450.439	337.524	324.707
	5.27	450.439	335.083	327.759
	5.28	453.491	331.421	327.759
	5.29	452.881	332.642	321.655
	5.3	449.829	332.642	320.435
	5.31	447.388	333.862	323.486
	5.32	447.388	335.693	327.148
	5.33	448.608	338.135	325.317
	5.34	450.439	340.576	321.045
	5.35	451.05	338.745	320.435
	5.36	453.491	337.524	320.435
	5.37	454.102	339.355	318.604
	5.38	452.27	339.966	318.604
	5.39	448.608	338.745	319.214
	5.4	446.167	338.135	318.604
	5.41	442.505	338.745	312.5
	5.42	441.284	340.576	313.721
	5.43	441.284	337.524	317.993
	5.44	441.284	333.252	320.435
	5.45	444.336	328.979	321.045
	5.46	443.726	327.759	320.435
	5.47	441.895	327.148	316.772
	5.48	444.336	328.369	317.993
	5.49	447.388	335.083	317.383
	5.5	451.66	336.304	317.993
	5.51	452.27	335.693	317.383
	5.52	449.829	329.59	319.824
	5.53	446.167	327.759	318.604
	5.54	446.777	330.2	316.162
	5.55	448.608	334.473	318.604
	5.56	448.608	332.031	317.383
	5.57	445.557	326.538	315.552
	5.58	440.674	326.538	312.5
	5.59	438.843	327.759	310.669
	5.6	445.557	328.369	313.11
	5.61	449.829	327.759	316.162
	5.62	454.712	328.369	322.266
	5.63	454.102	327.759	324.707
	5.64	449.219	326.538	327.148
	5.65	444.946	329.59	327.148
	5.66	443.115	332.031	324.097
	5.67	441.895	337.524	316.162
	5.68	439.453	343.628	316.162
	5.69	438.843	344.849	317.993
	5.7	437.622	344.849	322.266
	5.71	441.284	344.238	321.045
	5.72	444.336	342.407	316.772
	5.73	444.946	339.966	313.721
	5.74	444.336	339.966	312.5
	5.75	446.777	339.966	310.669
	5.76	446.167	339.355	316.772
	5.77	440.674	336.914	321.655
	5.78	439.453	332.642	321.045
	5.79	437.012	330.2	316.772
	5.8	436.401	330.2	312.5
	5.81	437.622	328.369	310.059
	5.82	440.063	331.421	311.89
	5.83	440.674	335.083	310.669
	5.84	441.284	336.304	309.448
	5.85	441.284	337.524	309.448
	5.86	441.895	333.862	313.11
	5.87	444.336	328.369	316.772
	5.88	448.608	327.759	319.214
	5.89	449.829	330.2	321.045
	5.9	450.439	333.862	319.214
	5.91	451.66	334.473	316.162
	5.92	452.881	339.355	314.941
	5.93	451.05	344.238	317.993
	5.94	447.388	344.238	321.655
	5.95	440.674	337.524	322.266
	5.96	438.843	332.642	319.214
	5.97	444.336	328.369	316.772
	5.98	445.557	324.707	319.214
	5.99	446.777	323.486	319.824
	6	450.439	328.979	317.993
	6.01	449.219	332.642	317.383
	6.02	446.167	332.642	314.331
	6.03	443.115	329.59	315.552
	6.04	443.726	331.421	321.655
	6.05	444.336	330.811	321.655
	6.06	448.608	327.759	322.266
	6.07	447.998	323.486	317.993
	6.08	446.167	323.486	316.162
	6.09	443.726	327.759	316.772
	6.1	441.895	335.693	313.721
	6.11	440.063	334.473	308.228
	6.12	442.505	333.862	310.059
	6.13	447.998	334.473	314.941
	6.14	450.439	332.642	322.266
	6.15	446.777	335.693	322.266
	6.16	440.674	336.304	320.435
	6.17	437.012	334.473	316.162
	6.18	437.622	331.421	314.941
	6.19	441.284	323.486	314.941
	6.2	445.557	322.876	317.383
	6.21	448.608	327.148	315.552
	6.22	451.05	328.369	310.669
	6.23	451.66	326.538	310.669
	6.24	450.439	325.928	312.5
	6.25	452.881	327.148	310.059
	6.26	455.322	328.979	315.552
	6.27	451.05	332.642	318.604
	6.28	446.167	330.2	322.266
	6.29	444.336	332.031	321.045
	6.3	444.336	330.811	317.383
	6.31	444.946	332.642	316.162
	6.32	449.219	334.473	313.11
	6.33	451.05	333.252	305.786
	6.34	452.881	335.083	305.786
	6.35	457.764	337.524	307.007
	6.36	458.984	336.914	307.617
	6.37	457.764	335.083	310.059
	6.38	458.374	333.862	310.669
	6.39	459.595	335.083	311.89
	6.4	456.543	338.745	319.214
	6.41	450.439	340.576	322.266
	6.42	448.608	339.355	322.266
	6.43	447.998	338.745	319.824
	6.44	446.167	336.914	318.604
	6.45	441.895	336.304	317.383
	6.46	437.622	335.693	315.552
	6.47	441.284	336.914	315.552
	6.48	445.557	333.862	319.824
	6.49	448.608	330.2	324.707
	6.5	447.388	325.317	324.707
	6.51	446.777	324.707	326.538
	6.52	447.998	322.876	323.486
	6.53	452.27	322.266	318.604
	6.54	454.712	321.045	313.11
	6.55	451.66	323.486	307.007
	6.56	448.608	327.759	309.448
	6.57	444.946	334.473	311.89
	6.58	441.895	333.252	314.941
	6.59	444.946	330.2	314.331
	6.6	449.829	329.59	315.552
	6.61	454.712	329.59	317.993
	6.62	454.102	330.811	322.266
	6.63	452.881	329.59	318.604
	6.64	452.27	328.979	319.824
	6.65	452.27	328.979	322.266
	6.66	449.219	328.979	321.045
	6.67	449.219	333.252	321.655
	6.68	450.439	336.304	320.435
	6.69	451.66	336.304	318.604
	6.7	448.608	333.252	316.772
	6.71	446.167	333.252	316.772
	6.72	444.946	335.693	312.5
	6.73	441.284	336.304	313.11
	6.74	441.284	337.524	317.383
	6.75	440.063	335.083	315.552
	6.76	443.726	334.473	314.331
	6.77	446.777	333.252	311.89
	6.78	448.608	333.862	315.552
	6.79	446.777	333.862	319.824
	6.8	448.608	330.811	320.435
	6.81	449.829	328.979	320.435
	6.82	452.27	330.811	318.604
	6.83	448.608	328.979	311.89
	6.84	443.115	330.2	307.007
	6.85	443.115	329.59	313.721
	6.86	441.284	331.421	317.383
	6.87	438.843	330.811	316.772
	6.88	441.895	330.811	315.552
	6.89	446.167	327.759	317.993
	6.9	449.829	327.148	318.604
	6.91	451.66	326.538	318.604
	6.92	455.933	324.707	314.941
	6.93	454.712	327.759	310.669
	6.94	452.27	327.759	309.448
	6.95	448.608	325.928	309.448
	6.96	446.777	324.707	308.228
	6.97	445.557	324.707	310.669
	6.98	445.557	330.2	314.331
	6.99	441.895	336.304	320.435
	7	434.57	338.135	321.045
	7.01	433.35	338.745	317.993
	7.02	437.012	335.693	321.045
	7.03	442.505	330.811	327.759
	7.04	445.557	328.979	326.538
	7.05	451.66	333.252	324.707
	7.06	456.543	336.304	321.045
	7.07	455.933	338.135	316.162
	7.08	452.881	336.304	310.669
	7.09	450.439	334.473	308.228
	7.1	446.777	335.083	311.89
	7.11	442.505	338.135	315.552
	7.12	440.063	340.576	321.655
	7.13	438.232	336.304	321.655
	7.14	435.791	332.642	320.435
	7.15	438.232	332.031	318.604
	7.16	441.284	330.2	319.214
	7.17	441.895	330.2	318.604
	7.18	440.674	329.59	316.772
	7.19	440.063	328.369	319.824
	7.2	441.895	323.486	320.435
	7.21	441.284	319.824	322.266
	7.22	441.284	316.772	321.655
	7.23	443.115	319.214	324.707
	7.24	444.946	323.486	320.435
	7.25	447.388	326.538	319.824
	7.26	447.998	330.811	320.435
	7.27	446.777	335.693	318.604
	7.28	447.388	339.355	322.266
	7.29	444.946	343.628	326.538
	7.3	446.167	344.849	328.369
	7.31	443.726	345.459	324.707
	7.32	437.622	343.628	321.045
	7.33	433.96	341.797	318.604
	7.34	434.57	338.745	314.941
	7.35	438.232	331.421	311.89
	7.36	440.674	327.148	311.89
	7.37	436.401	326.538	313.721
	7.38	437.012	328.369	317.383
	7.39	437.622	328.369	319.214
	7.4	438.843	327.759	317.383
	7.41	443.115	322.876	315.552
	7.42	445.557	325.317	316.162
	7.43	447.998	328.369	322.266
	7.44	449.219	332.642	327.759
	7.45	447.998	336.304	332.031
	7.46	445.557	338.135	331.421
	7.47	441.895	339.355	325.317
	7.48	441.895	339.966	317.993
	7.49	445.557	336.304	316.162
	7.5	443.115	334.473	314.941
	7.51	444.336	331.421	315.552
	7.52	440.674	326.538	316.162
	7.53	436.401	325.317	317.993
	7.54	435.791	329.59	316.162
	7.55	437.622	330.811	314.331
	7.56	441.895	335.693	318.604
	7.57	448.608	335.693	320.435
	7.58	449.829	332.031	323.486
	7.59	446.777	330.811	321.655
	7.6	440.674	329.59	314.331
	7.61	436.401	328.979	308.838
	7.62	437.012	330.2	307.617
	7.63	441.895	330.2	311.279
	7.64	449.829	330.811	318.604
	7.65	452.881	331.421	322.266
	7.66	455.322	330.2	324.707
	7.67	449.829	329.59	328.369
	7.68	437.012	327.759	330.2
	7.69	426.025	326.538	327.759
	7.7	427.856	328.369	330.2
	7.71	435.791	326.538	322.266
	7.72	441.895	325.928	317.993
	7.73	448.608	329.59	314.331
	7.74	454.102	329.59	314.331
	7.75	454.712	328.979	314.941
	7.76	453.491	328.979	319.214
	7.77	451.05	325.928	319.824
	7.78	447.388	324.707	320.435
	7.79	445.557	322.266	316.162
	7.8	443.115	324.097	315.552
	7.81	443.115	329.59	317.993
	7.82	444.946	333.252	321.655
	7.83	446.167	333.252	320.435
	7.84	443.726	329.59	322.266
	7.85	437.622	325.317	320.435
	7.86	435.181	326.538	317.993
	7.87	440.063	332.031	318.604
	7.88	443.726	332.642	319.824
	7.89	444.946	329.59	321.045
	7.9	447.998	328.369	324.097
	7.91	452.27	330.2	325.928
	7.92	454.712	330.2	324.707
	7.93	451.66	328.979	322.266
	7.94	446.777	328.979	318.604
	7.95	443.115	333.862	317.383
	7.96	438.232	333.862	313.11
	7.97	433.96	333.862	313.11
	7.98	435.791	336.914	315.552
	7.99	439.453	338.135	317.383
	8	447.388	338.745	319.824
	8.01	451.66	339.966	321.045
	8.02	449.829	334.473	323.486
	8.03	444.336	329.59	324.097
	8.04	445.557	327.759	323.486
	8.05	447.998	324.097	317.993
	8.06	447.388	328.369	314.941
	8.07	444.336	330.811	314.941
	8.08	440.674	334.473	316.162
	8.09	439.453	333.862	317.993
	8.1	439.453	335.083	317.993
	8.11	440.674	335.083	323.486
	8.12	442.505	329.59	326.538
	8.13	441.895	323.486	322.266
	8.14	440.674	321.655	314.331
	8.15	442.505	325.317	310.059
	8.16	444.946	327.148	307.617
	8.17	443.726	332.642	304.565
	8.18	440.063	333.252	303.345
	8.19	438.232	332.031	302.124
	8.2	437.012	333.862	306.396
	8.21	435.181	334.473	309.448
	8.22	435.791	333.862	312.5
	8.23	438.843	333.252	312.5
	8.24	436.401	333.252	315.552
	8.25	440.674	336.914	319.214
	8.26	443.115	338.745	323.486
	8.27	437.622	335.693	325.928
	8.28	431.519	335.083	325.928
	8.29	430.298	336.914	324.707
	8.3	430.298	334.473	322.876
	8.31	432.739	338.135	317.993
	8.32	430.298	339.966	315.552
	8.33	427.856	339.966	314.941
	8.34	427.246	338.135	315.552
	8.35	429.077	336.914	316.772
	8.36	433.35	338.135	317.383
	8.37	438.843	340.576	314.331
	8.38	444.946	340.576	311.89
	8.39	444.946	337.524	311.89
	8.4	444.336	330.811	312.5
	8.41	441.284	330.811	314.941
	8.42	441.284	334.473	317.993
	8.43	441.895	336.304	319.824
	8.44	438.232	336.304	317.383
	8.45	437.012	335.083	317.993
	8.46	437.622	332.642	319.824
	8.47	438.232	329.59	318.604
	8.48	437.012	324.707	319.214
	8.49	437.012	319.824	317.993
	8.5	437.622	322.876	317.993
	8.51	437.622	328.979	319.214
	8.52	437.012	331.421	321.045
	8.53	437.012	333.252	323.486
	8.54	438.843	332.031	321.655
	8.55	440.063	330.811	319.824
	8.56	440.063	332.031	319.824
	8.57	440.674	332.642	320.435
	8.58	441.895	336.304	322.266
	8.59	442.505	336.304	324.097
	8.6	442.505	333.862	324.097
	8.61	443.115	332.642	321.655
	8.62	440.063	335.083	318.604
	8.63	438.232	332.031	316.772
	8.64	435.791	326.538	314.941
	8.65	435.791	324.097	321.045
	8.66	434.57	324.707	324.097
	8.67	433.35	324.097	327.148
	8.68	428.467	326.538	328.369
	8.69	430.908	330.811	323.486
	8.7	433.35	335.693	317.993
	8.71	435.181	339.355	314.331
	8.72	434.57	341.797	314.941
	8.73	432.739	341.187	315.552
	8.74	429.077	335.083	313.11
	8.75	430.908	331.421	314.941
	8.76	436.401	330.811	316.772
	8.77	437.622	327.148	317.383
	8.78	440.674	332.031	318.604
	8.79	441.895	341.187	316.772
	8.8	443.115	344.238	314.941
	8.81	441.284	341.187	314.331
	8.82	435.791	337.524	315.552
	8.83	435.791	333.862	315.552
	8.84	433.96	329.59	318.604
	8.85	430.298	332.031	321.045
	8.86	427.856	336.304	323.486
	8.87	430.908	336.304	322.876
	8.88	432.739	335.693	325.317
	8.89	435.791	334.473	323.486
	8.9	438.232	332.642	322.266
	8.91	433.96	335.083	318.604
	8.92	431.519	336.914	313.721
	8.93	431.519	333.252	315.552
	8.94	431.519	329.59	315.552
	8.95	430.298	330.811	316.772
	8.96	433.96	335.083	318.604
	8.97	437.622	339.966	324.097
	8.98	438.232	344.238	322.876
	8.99	433.35	344.238	320.435
	9	429.077	336.914	319.214
	9.01	426.025	333.252	317.993
	9.02	424.805	332.642	316.772
	9.03	424.194	335.083	314.331
	9.04	424.194	338.135	314.941
	9.05	427.856	342.407	317.383
	9.06	433.35	343.018	320.435
	9.07	435.791	340.576	317.383
	9.08	437.012	336.914	313.11
	9.09	436.401	336.304	316.772
	9.1	435.181	339.355	319.824
	9.11	435.181	338.745	319.824
	9.12	433.35	337.524	320.435
	9.13	432.129	341.797	317.993
	9.14	435.181	343.628	317.993
	9.15	434.57	343.018	319.824
	9.16	435.791	341.797	323.486
	9.17	441.284	341.797	324.707
	9.18	443.115	342.407	325.317
	9.19	441.895	342.407	327.148
	9.2	439.453	345.459	327.148
	9.21	437.012	347.9	327.759
	9.22	438.843	347.29	324.707
	9.23	438.232	344.849	320.435
	9.24	436.401	344.238	316.772
	9.25	438.232	345.459	317.383
	9.26	438.232	347.29	320.435
	9.27	438.843	347.29	322.266
	9.28	437.622	344.238	314.941
	9.29	437.012	336.914	313.11
	9.3	437.622	333.252	311.89
	9.31	439.453	336.914	314.331
	9.32	437.012	342.407	315.552
	9.33	433.35	346.68	319.214
	9.34	437.012	346.069	318.604
	9.35	437.622	340.576	317.993
	9.36	437.012	332.642	317.383
	9.37	432.739	328.979	314.941
	9.38	433.35	330.811	314.331
	9.39	437.012	337.524	313.721
	9.4	443.115	347.29	317.993
	9.41	446.777	349.121	319.214
	9.42	447.998	341.797	322.266
	9.43	447.388	339.355	322.876
	9.44	444.336	338.135	324.097
	9.45	444.946	335.083	321.655
	9.46	443.726	337.524	316.162
	9.47	446.167	338.745	317.383
	9.48	451.66	341.187	320.435
	9.49	451.05	340.576	322.266
	9.5	448.608	339.355	319.824
	9.51	447.998	341.187	320.435
	9.52	443.726	340.576	319.214
	9.53	440.063	338.135	316.772
	9.54	440.674	339.355	315.552
	9.55	442.505	340.576	316.162
	9.56	442.505	337.524	316.772
	9.57	440.063	334.473	319.214
	9.58	439.453	333.252	321.655
	9.59	440.674	334.473	324.097
	9.6	441.895	342.407	325.317
	9.61	445.557	344.238	321.045
	9.62	444.336	338.745	316.772
	9.63	446.167	335.693	314.331
	9.64	447.998	337.524	317.383
	9.65	448.608	339.966	320.435
	9.66	445.557	344.238	321.655
	9.67	446.167	349.121	322.266
	9.68	445.557	350.952	326.538
	9.69	444.946	349.731	325.928
	9.7	443.726	345.459	322.876
	9.71	445.557	339.355	319.214
	9.72	451.05	338.135	317.993
	9.73	450.439	336.914	322.876
	9.74	446.777	337.524	324.707
	9.75	446.167	338.135	324.097
	9.76	441.895	344.238	323.486
	9.77	444.336	348.511	323.486
	9.78	445.557	347.9	321.045
	9.79	440.063	341.797	322.266
	9.8	437.012	339.966	322.876
	9.81	441.895	341.797	325.317
	9.82	445.557	341.797	325.317
	9.83	446.167	343.018	325.928
	9.84	442.505	344.238	324.707
	9.85	440.674	345.459	325.928
	9.86	440.063	341.797	322.876
	9.87	440.674	336.914	319.214
	9.88	443.726	334.473	322.266
	9.89	450.439	338.135	325.317
	9.9	451.05	338.745	328.369
	9.91	447.388	339.355	328.369
	9.92	441.895	340.576	324.097
	9.93	432.739	338.745	321.655
	9.94	431.519	339.355	319.824
	9.95	434.57	341.797	324.707
	9.96	438.232	338.745	327.148
	9.97	441.895	336.914	328.369
	9.98	441.895	332.031	324.097
	9.99	444.336	328.369	323.486
	10	444.336	327.148	322.266
	10.01	438.843	332.031	322.266
	10.02	435.791	336.304	324.707
	10.03	439.453	335.083	324.097
	10.04	440.674	330.811	322.876
	10.05	441.895	328.979	326.538
	10.06	441.895	333.862	327.148
	10.07	438.232	338.135	327.759
	10.08	434.57	342.407	325.928
	10.09	430.908	340.576	321.655
	10.1	429.077	342.407	319.824
	10.11	433.35	344.849	317.993
	10.12	438.232	345.459	319.824
	10.13	439.453	347.29	320.435
	10.14	444.336	344.238	322.876
	10.15	445.557	342.407	323.486
	10.16	447.388	338.745	320.435
	10.17	450.439	335.693	314.941
	10.18	453.491	336.914	311.89
	10.19	454.712	341.187	311.279
	10.2	452.27	338.135	312.5
	10.21	441.284	337.524	316.772
	10.22	432.739	340.576	325.317
	10.23	432.129	343.628	328.369
	10.24	437.012	344.849	331.421
	10.25	441.284	343.628	325.317
	10.26	438.843	344.238	317.993
	10.27	442.505	343.018	314.941
	10.28	443.115	340.576	314.331
	10.29	440.063	337.524	317.993
	10.3	443.726	332.642	322.266
	10.31	445.557	331.421	320.435
	10.32	446.167	333.252	324.097
	10.33	447.998	336.304	327.759
	10.34	444.946	336.304	329.59
	10.35	442.505	338.135	326.538
	10.36	443.115	339.966	323.486
	10.37	440.674	338.745	320.435
	10.38	439.453	336.914	321.045
	10.39	440.063	337.524	319.214
	10.4	438.843	336.304	321.655
	10.41	444.946	336.304	319.214
	10.42	448.608	334.473	316.772
	10.43	451.05	335.083	315.552
	10.44	451.66	337.524	318.604
	10.45	447.388	338.745	319.214
	10.46	443.115	336.304	321.045
	10.47	444.946	334.473	321.655
	10.48	444.946	333.862	322.266
	10.49	444.946	333.252	324.097
	10.5	445.557	333.252	321.655
	10.51	441.284	332.642	318.604
	10.52	441.284	331.421	313.11
	10.53	442.505	330.811	310.669
	10.54	445.557	329.59	315.552
	10.55	447.998	328.979	321.045
	10.56	446.777	333.252	322.876
	10.57	448.608	332.642	325.928
	10.58	448.608	330.811	328.369
	10.59	445.557	328.979	331.421
	10.6	441.284	328.369	330.811
	10.61	442.505	327.148	328.979
	10.62	443.115	326.538	325.317
	10.63	444.336	325.928	322.266
	10.64	441.895	328.979	317.383
	10.65	441.895	330.2	317.383
	10.66	444.946	328.369	317.993
	10.67	451.05	324.707	319.824
	10.68	451.66	324.707	321.045
	10.69	451.66	326.538	317.383
	10.7	447.388	328.979	319.824
	10.71	443.115	333.862	323.486
	10.72	439.453	335.693	324.707
	10.73	438.232	338.745	325.928
	10.74	440.674	337.524	325.317
	10.75	443.726	334.473	323.486
	10.76	445.557	329.59	326.538
	10.77	447.388	325.928	328.369
	10.78	447.998	324.097	328.369
	10.79	446.777	324.707	326.538
	10.8	443.115	325.928	322.876
	10.81	439.453	328.369	319.824
	10.82	435.791	330.811	319.824
	10.83	432.739	330.811	319.214
	10.84	434.57	327.148	322.876
	10.85	435.181	327.148	322.876
	10.86	441.284	330.811	322.876
	10.87	452.27	334.473	325.317
	10.88	454.102	335.693	327.759
	10.89	450.439	330.811	323.486
	10.9	440.674	325.317	318.604
	10.91	436.401	325.928	318.604
	10.92	436.401	328.979	319.824
	10.93	439.453	330.2	321.045
	10.94	445.557	335.693	319.824
	10.95	449.219	336.914	316.772
	10.96	447.998	330.811	313.721
	10.97	446.777	326.538	313.11
	10.98	444.336	328.979	315.552
	10.99	444.946	332.031	318.604
	11	443.726	335.693	321.655
	11.01	444.336	333.252	324.707
	11.02	444.336	328.979	321.655
	11.03	446.167	326.538	322.876
	11.04	442.505	322.876	324.707
	11.05	442.505	325.928	323.486
	11.06	440.063	328.979	317.383
	11.07	438.843	331.421	310.669
	11.08	441.895	330.2	307.007
	11.09	442.505	330.811	308.838
	11.1	443.726	333.252	313.721
	11.11	446.167	334.473	318.604
	11.12	444.336	333.862	323.486
	11.13	440.063	332.642	327.148
	11.14	432.739	332.031	325.928
	11.15	432.739	331.421	325.317
	11.16	440.063	335.083	325.928
	11.17	448.608	337.524	324.097
	11.18	452.27	339.355	324.707
	11.19	452.881	336.914	317.993
	11.2	450.439	334.473	316.162
	11.21	446.167	332.031	316.162
	11.22	442.505	332.031	320.435
	11.23	438.843	332.031	321.655
	11.24	436.401	333.862	324.097
	11.25	439.453	335.083	323.486
	11.26	441.895	334.473	324.097
	11.27	448.608	329.59	319.214
	11.28	453.491	326.538	317.383
	11.29	460.815	328.369	314.941
	11.3	460.815	331.421	316.162
	11.31	457.764	335.083	317.993
	11.32	449.219	333.862	323.486
	11.33	444.336	335.083	328.369
	11.34	440.674	333.252	335.083
	11.35	440.674	329.59	334.473
	11.36	443.726	324.707	325.317
	11.37	444.336	321.655	318.604
	11.38	442.505	321.655	319.214
	11.39	440.674	325.317	321.655
	11.4	441.284	327.759	322.876
	11.41	440.674	333.252	322.266
	11.42	443.726	336.304	323.486
	11.43	444.336	338.745	321.655
	11.44	442.505	336.914	318.604
	11.45	444.336	335.693	319.824
	11.46	445.557	334.473	322.876
	11.47	446.167	335.083	327.148
	11.48	443.726	331.421	324.707
	11.49	439.453	330.811	322.876
	11.5	441.284	329.59	317.993
	11.51	439.453	330.811	314.941
	11.52	430.908	336.304	317.383
	11.53	427.246	338.135	317.993
	11.54	430.908	338.135	319.214
	11.55	431.519	337.524	323.486
	11.56	436.401	338.745	322.266
	11.57	434.57	341.187	321.045
	11.58	431.519	343.018	321.655
	11.59	434.57	344.238	322.876
	11.6	434.57	339.355	323.486
	11.61	433.96	334.473	324.097
	11.62	435.181	331.421	325.317
	11.63	435.791	331.421	325.317
	11.64	435.791	328.979	325.317
	11.65	433.96	327.759	322.876
	11.66	431.519	330.2	318.604
	11.67	433.35	332.031	319.214
	11.68	435.791	333.252	323.486
	11.69	438.232	333.252	327.148
	11.7	441.895	332.031	325.317
	11.71	444.336	332.642	323.486
	11.72	447.998	333.862	322.266
	11.73	449.829	332.642	325.317
	11.74	447.388	333.862	323.486
	11.75	443.726	332.031	322.876
	11.76	441.284	330.811	325.317
	11.77	438.232	333.862	327.148
	11.78	435.791	336.304	324.707
	11.79	440.063	337.524	324.097
	11.8	447.388	333.252	326.538
	11.81	450.439	330.2	322.876
	11.82	448.608	333.862	319.214
	11.83	447.388	335.083	317.993
	11.84	446.167	330.811	320.435
	11.85	442.505	325.928	317.993
	11.86	441.284	321.655	315.552
	11.87	441.895	322.266	317.993
	11.88	449.219	324.707	322.266
	11.89	449.829	327.759	328.369
	11.9	447.388	332.031	324.707
	11.91	444.946	332.642	317.993
	11.92	444.946	330.2	313.721
	11.93	446.777	328.979	317.383
	11.94	447.388	328.369	322.266
	11.95	441.284	327.148	322.876
	11.96	439.453	325.928	321.045
	11.97	438.232	328.369	322.876
	11.98	437.622	327.759	321.655
	11.99	439.453	328.369	321.045
	12	444.946	327.759	322.876
	12.01	448.608	329.59	327.148
	12.02	449.219	332.031	328.979
	12.03	451.66	330.811	326.538
	12.04	452.27	325.928	325.928
	12.05	450.439	325.928	322.266
	12.06	449.219	324.707	321.655
	12.07	448.608	324.707	322.876
	12.08	442.505	326.538	321.045
	12.09	439.453	328.369	319.214
	12.1	442.505	328.979	322.876
	12.11	444.946	333.252	322.266
	12.12	446.777	333.252	319.824
	12.13	445.557	327.759	319.824
	12.14	443.726	321.045	321.045
	12.15	442.505	316.772	322.876
	12.16	443.726	321.045	324.707
	12.17	446.777	324.097	322.876
	12.18	442.505	322.876	322.266
	12.19	442.505	324.707	319.214
	12.2	438.843	327.759	319.214
	12.21	443.115	331.421	319.824
	12.22	445.557	333.862	318.604
	12.23	446.167	330.811	314.941
	12.24	447.388	327.148	317.383
	12.25	445.557	327.148	314.941
	12.26	441.895	332.031	318.604
	12.27	438.232	337.524	322.266
	12.28	437.012	338.745	323.486
	12.29	440.063	335.693	319.824
	12.3	444.336	333.862	317.383
	12.31	443.726	332.031	319.214
	12.32	443.726	333.862	318.604
	12.33	441.895	336.914	319.824
	12.34	441.895	338.135	318.604
	12.35	441.895	334.473	318.604
	12.36	441.895	330.2	316.772
	12.37	446.777	328.369	317.993
	12.38	449.829	328.369	319.824
	12.39	448.608	327.759	322.876
	12.4	444.946	326.538	325.928
	12.41	442.505	328.979	325.928
	12.42	440.674	331.421	325.928
	12.43	439.453	336.914	323.486
	12.44	440.674	341.187	318.604
	12.45	438.232	340.576	315.552
	12.46	435.791	337.524	315.552
	12.47	432.739	333.862	316.772
	12.48	429.077	330.2	319.214
	12.49	427.856	330.811	322.876
	12.5	428.467	327.759	324.097
	12.51	431.519	328.369	324.707
	12.52	434.57	330.811	323.486
	12.53	436.401	336.304	320.435
	12.54	437.622	338.135	319.824
	12.55	438.232	338.745	318.604
	12.56	435.791	340.576	317.383
	12.57	435.791	335.693	314.941
	12.58	439.453	330.811	315.552
	12.59	440.674	323.486	315.552
	12.6	443.726	323.486	317.993
	12.61	446.777	323.486	322.876
	12.62	444.336	323.486	325.928
	12.63	446.167	323.486	322.876
	12.64	446.777	326.538	321.655
	12.65	449.829	328.979	321.045
	12.66	448.608	330.2	316.772
	12.67	447.388	329.59	308.838
	12.68	447.998	327.759	307.007
	12.69	446.167	324.097	311.89
	12.7	444.336	320.435	314.331
	12.71	444.336	319.214	316.772
	12.72	446.777	321.045	314.331
	12.73	446.167	324.707	316.772
	12.74	444.946	328.369	318.604
	12.75	444.946	332.031	319.824
	12.76	444.946	333.862	321.045
	12.77	444.946	333.252	324.097
	12.78	442.505	332.642	325.928
	12.79	440.674	330.811	319.824
	12.8	443.115	329.59	316.772
	12.81	445.557	328.369	316.772
	12.82	450.439	327.148	320.435
	12.83	449.219	328.369	324.707
	12.84	444.946	330.2	327.148
	12.85	438.232	333.862	324.097
	12.86	436.401	333.252	318.604
	12.87	436.401	332.031	314.331
	12.88	439.453	331.421	314.331
	12.89	442.505	332.031	317.383
	12.9	444.946	330.811	316.772
	12.91	443.726	332.031	317.993
	12.92	441.895	334.473	319.824
	12.93	441.284	335.693	319.214
	12.94	443.115	337.524	315.552
	12.95	441.895	340.576	316.162
	12.96	441.895	340.576	319.824
	12.97	441.895	335.693	319.214
	12.98	439.453	332.031	322.876
	12.99	438.843	328.369	327.148
	13	438.232	330.2	327.148
	13.01	439.453	336.914	325.317
	13.02	443.726	336.914	319.824
	13.03	444.336	333.862	317.383
	13.04	440.674	328.369	317.993
	13.05	440.063	327.759	319.214
	13.06	440.063	332.031	318.604
	13.07	438.843	335.693	318.604
	13.08	437.012	333.252	316.772
	13.09	437.012	332.642	313.11
	13.1	437.622	332.031	311.89
	13.11	438.232	334.473	314.331
	13.12	441.895	334.473	319.214
	13.13	446.167	333.862	319.824
	13.14	447.388	333.252	314.941
	13.15	444.336	330.811	311.89
	13.16	445.557	326.538	311.279
	13.17	444.946	321.045	316.772
	13.18	453.491	325.928	320.435
	13.19	455.322	333.252	324.097
	13.2	449.219	335.083	322.876
	13.21	441.895	332.031	317.383
	13.22	437.622	333.252	310.669
	13.23	436.401	333.862	310.669
	13.24	434.57	334.473	311.89
	13.25	435.791	331.421	316.162
	13.26	437.622	327.148	321.655
	13.27	442.505	324.707	324.707
	13.28	444.946	323.486	323.486
	13.29	445.557	324.707	320.435
	13.3	444.336	324.707	317.993
	13.31	443.115	328.979	316.772
	13.32	438.232	333.862	319.214
	13.33	437.622	336.914	321.655
	13.34	441.284	338.745	320.435
	13.35	444.336	336.304	320.435
	13.36	448.608	337.524	320.435
	13.37	447.998	336.914	320.435
	13.38	443.115	332.031	320.435
	13.39	441.895	328.369	321.045
	13.4	441.284	328.369	316.772
	13.41	445.557	325.317	313.11
	13.42	445.557	319.824	311.279
	13.43	449.219	321.045	310.669
	13.44	449.829	325.317	310.669
	13.45	447.998	330.811	311.89
	13.46	442.505	332.031	314.941
	13.47	436.401	328.979	313.721
	13.48	438.843	327.759	312.5
	13.49	441.895	331.421	314.331
	13.5	441.895	334.473	315.552
	13.51	438.843	333.862	315.552
	13.52	437.622	333.252	311.279
	13.53	443.115	328.369	308.838
	13.54	444.336	323.486	309.448
	13.55	444.946	325.928	307.617
	13.56	444.336	332.642	311.89
	13.57	445.557	339.966	314.941
	13.58	446.167	338.745	313.11
	13.59	446.167	335.693	314.941
	13.6	442.505	332.642	314.941
	13.61	438.843	333.862	312.5
	13.62	438.843	334.473	315.552
	13.63	440.063	335.083	319.214
	13.64	440.063	335.693	319.824
	13.65	438.843	333.252	319.214
	13.66	440.063	330.2	317.383
	13.67	441.895	333.252	316.772
	13.68	444.946	337.524	319.214
	13.69	442.505	339.355	321.045
	13.7	442.505	339.966	324.707
	13.71	444.336	336.914	322.266
	13.72	446.167	334.473	315.552
	13.73	449.219	335.693	310.059
	13.74	452.27	336.914	308.838
	13.75	451.05	335.693	313.11
	13.76	449.219	336.914	320.435
	13.77	448.608	336.914	318.604
	13.78	447.998	333.862	315.552
	13.79	442.505	330.2	315.552
	13.8	442.505	328.369	314.941
	13.81	443.115	327.759	318.604
	13.82	444.946	324.707	321.045
	13.83	449.829	325.317	324.707
	13.84	451.66	327.759	325.317
	13.85	452.881	330.2	326.538
	13.86	455.322	329.59	324.097
	13.87	453.491	332.642	321.655
	13.88	449.829	330.2	319.824
	13.89	443.115	326.538	319.214
	13.9	440.674	327.759	318.604
	13.91	441.895	332.642	317.383
	13.92	441.284	335.083	318.604
	13.93	441.284	331.421	319.824
	13.94	444.946	328.369	321.045
	13.95	447.388	330.2	322.876
	13.96	446.777	332.031	324.707
	13.97	447.388	333.862	324.097
	13.98	442.505	336.914	320.435
	13.99	440.674	333.862	316.162
	14	441.895	330.811	316.162
	14.01	445.557	327.759	317.993
	14.02	443.115	327.759	317.383
	14.03	441.284	330.2	318.604
	14.04	443.115	332.642	320.435
	14.05	448.608	332.642	317.383
	14.06	451.66	329.59	316.772
	14.07	458.374	325.928	315.552
	14.08	455.322	323.486	318.604
	14.09	451.66	325.928	319.824
	14.1	447.388	327.148	319.214
	14.11	449.829	326.538	319.824
	14.12	451.66	330.811	319.824
	14.13	449.219	333.862	317.383
	14.14	442.505	335.083	320.435
	14.15	438.843	335.083	320.435
	14.16	440.063	332.642	315.552
	14.17	441.895	330.2	316.162
	14.18	443.726	329.59	313.721
	14.19	444.336	328.369	310.669
	14.2	446.777	327.759	310.669
	14.21	447.998	331.421	311.89
	14.22	446.777	331.421	318.604
	14.23	447.388	328.369	319.214
	14.24	450.439	328.369	314.941
	14.25	455.933	327.759	310.059
	14.26	454.102	326.538	306.396
	14.27	450.439	327.148	300.293
	14.28	447.388	323.486	303.955
	14.29	449.219	320.435	309.448
	14.3	451.05	319.214	312.5
	14.31	451.05	322.266	315.552
	14.32	449.219	326.538	314.331
	14.33	449.219	328.979	316.772
	14.34	448.608	330.811	317.993
	14.35	447.388	330.2	319.824
	14.36	444.946	326.538	317.993
	14.37	447.998	328.979	319.214
	14.38	454.102	333.862	320.435
	14.39	455.933	336.914	321.655
	14.4	456.543	338.745	319.214
	14.41	457.153	336.304	319.214
	14.42	455.933	333.252	318.604
	14.43	453.491	332.031	316.162
	14.44	448.608	332.642	317.383
	14.45	446.777	332.642	320.435
	14.46	446.777	335.083	321.655
	14.47	446.777	336.304	320.435
	14.48	447.998	336.914	316.162
	14.49	451.05	335.693	308.838
	14.5	452.881	336.304	311.279
	14.51	454.102	336.914	314.941
	14.52	451.05	339.966	318.604
	14.53	449.219	339.355	319.824
	14.54	449.829	343.018	316.162
	14.55	453.491	341.797	314.941
	14.56	455.933	335.693	316.772
	14.57	453.491	332.642	314.331
	14.58	447.388	335.693	315.552
	14.59	441.284	339.355	317.383
	14.6	441.895	338.745	319.824
	14.61	447.998	335.083	319.824
	14.62	455.322	334.473	316.772
	14.63	454.102	333.862	315.552
	14.64	448.608	330.811	317.383
	14.65	444.336	325.928	311.279
	14.66	444.336	325.317	316.772
	14.67	445.557	325.317	327.148
	14.68	447.388	326.538	332.031
	14.69	448.608	325.928	331.421
	14.7	451.05	325.317	323.486
	14.71	448.608	327.148	316.162
	14.72	446.777	328.369	314.331
	14.73	448.608	327.759	314.331
	14.74	448.608	328.369	316.772
	14.75	451.66	329.59	319.214
	14.76	455.933	327.759	318.604
	14.77	456.543	327.148	319.214
	14.78	454.102	328.979	319.214
	14.79	451.05	328.979	316.162
	14.8	452.27	327.759	315.552
	14.81	453.491	325.317	316.162
	14.82	457.153	327.148	319.214
	14.83	455.933	331.421	326.538
	14.84	455.933	333.862	324.707
	14.85	455.933	336.304	323.486
	14.86	457.764	335.083	322.266
	14.87	458.984	332.642	317.383
	14.88	460.815	333.862	314.331
	14.89	463.257	336.304	314.941
	14.9	460.815	332.031	313.721
	14.91	455.322	327.148	317.993
	14.92	452.881	325.928	321.655
	14.93	449.829	328.979	321.655
	14.94	441.895	330.811	324.097
	14.95	438.843	331.421	322.876
	14.96	444.946	333.252	321.045
	14.97	454.712	333.252	316.772
	14.98	459.595	335.083	314.941
	14.99	457.764	333.862	316.162
	15	455.933	332.642	316.772
	15.01	452.881	333.252	322.266
	15.02	451.66	332.031	322.876
	15.03	452.881	327.759	323.486
	15.04	457.764	327.148	324.097
	15.05	459.595	329.59	322.876
	15.06	455.933	333.252	316.162
	15.07	457.764	335.083	313.11
	15.08	457.764	331.421	316.162
	15.09	457.153	334.473	318.604
	15.1	457.153	338.745	321.655
	15.11	457.153	340.576	324.097
	15.12	461.426	335.693	325.317
	15.13	460.815	325.928	322.876
	15.14	459.595	323.486	324.097
	15.15	457.153	324.707	322.876
	15.16	457.153	329.59	318.604
	15.17	457.153	335.693	315.552
	15.18	458.374	333.252	314.941
	15.19	457.764	335.693	317.383
	15.2	455.933	336.304	321.045
	15.21	457.153	336.304	324.097
	15.22	455.322	334.473	325.928
	15.23	453.491	330.2	323.486
	15.24	455.933	328.369	319.214
	15.25	458.374	324.097	317.993
	15.26	460.205	325.317	319.824
	15.27	460.205	329.59	319.824
	15.28	457.153	335.083	314.941
	15.29	457.764	335.083	310.669
	15.3	457.764	334.473	313.11
	15.31	457.153	335.083	318.604
	15.32	455.322	334.473	320.435
	15.33	455.322	336.304	317.383
	15.34	457.153	333.862	317.383
	15.35	455.933	330.811	315.552
	15.36	453.491	327.148	316.772
	15.37	455.322	327.148	317.993
	15.38	455.322	325.928	319.824
	15.39	453.491	324.097	323.486
	15.4	451.66	323.486	324.707
	15.41	452.881	326.538	322.876
	15.42	455.322	331.421	322.266
	15.43	454.102	335.083	324.097
	15.44	455.933	335.083	327.148
	15.45	455.933	335.693	326.538
	15.46	454.712	330.811	320.435
	15.47	453.491	327.148	319.214
	15.48	454.712	324.097	318.604
	15.49	454.102	321.655	316.162
	15.5	454.712	324.097	313.11
	15.51	455.933	328.979	311.89
	15.52	457.153	332.642	316.772
	15.53	458.984	331.421	320.435
	15.54	459.595	333.252	319.214
	15.55	457.764	332.031	317.993
	15.56	456.543	330.811	319.214
	15.57	451.66	326.538	322.876
	15.58	446.777	323.486	323.486
	15.59	446.167	324.707	319.824
	15.6	449.219	322.876	318.604
	15.61	451.66	326.538	320.435
	15.62	452.881	327.148	321.045
	15.63	452.881	332.642	319.824
	15.64	453.491	338.135	318.604
	15.65	454.102	340.576	319.214
	15.66	454.712	333.862	318.604
	15.67	454.102	330.2	316.162
	15.68	455.322	328.369	317.993
	15.69	454.712	332.031	321.655
	15.7	452.27	333.862	323.486
	15.71	449.829	330.811	320.435
	15.72	451.66	330.811	320.435
	15.73	451.66	333.252	321.655
	15.74	451.66	335.083	322.266
	15.75	451.66	335.083	322.266
	15.76	454.102	332.031	322.876
	15.77	455.933	329.59	324.097
	15.78	455.933	328.979	323.486
	15.79	456.543	328.979	319.824
	15.8	454.712	327.759	313.11
	15.81	455.933	325.317	310.059
	15.82	455.933	321.655	307.007
	15.83	457.153	319.824	308.228
	15.84	457.764	316.162	311.279
	15.85	458.984	317.993	314.941
	15.86	457.764	321.045	318.604
	15.87	460.205	319.214	319.214
	15.88	460.205	319.214	319.824
	15.89	462.036	321.045	321.045
	15.9	465.698	326.538	317.383
	15.91	466.309	330.811	316.162
	15.92	466.309	335.083	317.993
	15.93	461.426	331.421	321.045
	15.94	457.764	325.317	327.148
	15.95	455.322	321.655	328.369
	15.96	454.102	319.824	326.538
	15.97	455.933	323.486	321.655
	15.98	455.322	325.317	321.045
	15.99	458.984	325.317	322.876
	16	461.426	322.266	321.045
	16.01	455.933	321.045	322.266
	16.02	453.491	325.317	322.266
	16.03	452.27	328.369	322.876
	16.04	452.27	330.2	321.655
	16.05	452.881	333.862	324.097
	16.06	451.05	336.914	327.759
	16.07	451.66	336.304	330.811
	16.08	455.322	335.083	327.148
	16.09	456.543	334.473	324.707
	16.1	461.426	332.031	323.486
	16.11	461.426	334.473	319.824
	16.12	462.036	335.693	317.993
	16.13	461.426	335.693	318.604
	16.14	463.867	330.811	321.045
	16.15	460.205	328.369	320.435
	16.16	454.102	326.538	325.317
	16.17	450.439	325.317	325.928
	16.18	451.05	323.486	327.759
	16.19	453.491	330.2	329.59
	16.2	458.984	333.862	328.369
	16.21	455.322	332.642	325.928
	16.22	444.336	333.862	324.097
	16.23	441.284	336.914	321.045
	16.24	445.557	337.524	324.707
	16.25	455.322	334.473	328.369
	16.26	460.205	332.642	325.928
	16.27	458.374	338.745	323.486
	16.28	455.322	341.797	323.486
	16.29	453.491	338.135	322.266
	16.3	454.102	336.304	319.824
	16.31	454.102	332.642	320.435
	16.32	458.984	328.979	318.604
	16.33	464.478	328.369	319.214
	16.34	464.478	328.979	318.604
	16.35	459.595	329.59	317.993
	16.36	455.322	332.642	325.317
	16.37	452.27	332.031	328.369
	16.38	452.27	333.252	328.979
	16.39	454.102	334.473	327.148
	16.4	455.933	334.473	326.538
	16.41	459.595	331.421	327.148
	16.42	458.984	332.031	324.707
	16.43	457.153	335.693	317.993
	16.44	455.933	335.693	315.552
	16.45	455.933	331.421	314.941
	16.46	457.153	327.759	317.383
	16.47	458.984	327.148	319.824
	16.48	460.815	330.2	321.045
	16.49	459.595	335.083	320.435
	16.5	458.374	338.745	322.266
	16.51	457.764	333.862	321.655
	16.52	460.205	327.759	321.655
	16.53	463.867	328.979	323.486
	16.54	460.205	327.148	318.604
	16.55	457.153	325.928	313.721
	16.56	457.153	324.097	313.11
	16.57	458.374	325.928	320.435
	16.58	460.205	329.59	327.148
	16.59	457.764	328.979	330.2
	16.6	454.712	330.811	325.928
	16.61	452.27	334.473	322.266
	16.62	452.881	328.979	317.993
	16.63	454.102	325.928	318.604
	16.64	455.322	323.486	322.266
	16.65	457.153	323.486	323.486
	16.66	457.153	325.928	323.486
	16.67	454.712	327.148	324.097
	16.68	451.66	324.097	322.266
	16.69	451.05	324.707	325.317
	16.7	454.712	327.148	326.538
	16.71	456.543	328.369	325.317
	16.72	457.764	332.031	322.266
	16.73	460.815	332.031	318.604
	16.74	462.036	329.59	319.824
	16.75	459.595	326.538	316.772
	16.76	460.205	321.655	313.721
	16.77	460.205	320.435	310.669
	16.78	461.426	323.486	317.383
	16.79	460.815	324.097	319.214
	16.8	457.764	325.317	321.655
	16.81	457.764	322.266	322.876
	16.82	455.322	323.486	322.876
	16.83	456.543	324.097	324.097
	16.84	452.27	328.979	323.486
	16.85	450.439	335.083	322.266
	16.86	452.881	336.304	319.824
	16.87	454.712	336.304	320.435
	16.88	454.102	334.473	321.045
	16.89	458.984	331.421	319.824
	16.9	461.426	330.2	316.772
	16.91	460.815	336.914	313.721
	16.92	462.646	339.355	313.721
	16.93	463.257	335.693	312.5
	16.94	463.257	331.421	313.721
	16.95	463.257	328.979	319.214
	16.96	466.309	328.369	324.097
	16.97	466.309	328.369	326.538
	16.98	462.646	327.148	327.759
	16.99	460.205	329.59	328.979
	17	457.153	330.811	328.979
	17.01	454.102	330.811	329.59
	17.02	451.66	328.369	326.538
	17.03	451.05	329.59	326.538
	17.04	452.27	332.642	325.317
	17.05	454.712	331.421	323.486
	17.06	455.322	331.421	324.097
	17.07	454.712	328.979	324.707
	17.08	455.322	328.979	325.928
	17.09	455.322	327.148	321.045
	17.1	454.712	328.369	314.331
	17.11	451.66	330.2	314.941
	17.12	451.05	329.59	318.604
	17.13	452.27	328.369	322.266
	17.14	452.27	327.759	325.928
	17.15	450.439	330.2	324.097
	17.16	449.829	332.642	322.266
	17.17	449.829	333.252	322.876
	17.18	450.439	330.811	323.486
	17.19	451.05	325.928	325.928
	17.2	451.05	325.317	327.148
	17.21	451.05	327.148	328.369
	17.22	448.608	327.759	327.148
	17.23	449.829	328.369	327.148
	17.24	453.491	328.979	326.538
	17.25	453.491	330.2	323.486
	17.26	457.153	332.642	322.876
	17.27	455.933	333.252	323.486
	17.28	455.933	330.811	325.928
	17.29	456.543	330.2	326.538
	17.3	452.27	331.421	324.707
	17.31	446.167	333.862	322.876
	17.32	443.115	333.862	322.876
	17.33	449.829	335.693	321.045
	17.34	452.27	333.862	317.383
	17.35	451.66	332.642	317.993
	17.36	451.66	333.252	321.045
	17.37	455.322	332.642	319.214
	17.38	453.491	332.642	317.383
	17.39	458.984	330.2	313.721
	17.4	458.984	325.317	310.059
	17.41	450.439	323.486	316.162
	17.42	444.336	325.928	322.266
	17.43	440.674	325.317	323.486
	17.44	442.505	324.097	321.655
	17.45	442.505	322.266	322.266
	17.46	443.726	322.876	324.707
	17.47	445.557	324.097	321.045
	17.48	444.946	327.148	317.383
	17.49	447.388	328.979	320.435
	17.5	450.439	329.59	324.097
	17.51	451.05	326.538	324.707
	17.52	447.998	322.876	321.655
	17.53	441.895	325.928	317.993
	17.54	439.453	333.862	316.772
	17.55	443.115	340.576	319.824
	17.56	446.167	342.407	320.435
	17.57	447.998	337.524	320.435
	17.58	447.998	333.252	321.045
	17.59	447.998	333.862	321.655
	17.6	448.608	333.252	319.214
	17.61	448.608	332.642	316.772
	17.62	448.608	327.759	317.383
	17.63	447.388	326.538	318.604
	17.64	447.998	324.097	319.824
	17.65	447.388	324.707	320.435
	17.66	447.998	327.759	322.266
	17.67	449.219	327.148	320.435
	17.68	449.829	322.266	316.772
	17.69	449.219	321.045	311.89
	17.7	448.608	317.993	309.448
	17.71	453.491	317.383	310.669
	17.72	451.05	315.552	313.11
	17.73	449.829	314.941	313.721
	17.74	455.933	314.941	313.11
	17.75	462.036	313.11	311.279
	17.76	465.698	315.552	313.721
	17.77	465.698	325.317	314.941
	17.78	466.309	330.811	317.383
	17.79	463.867	332.031	319.824
	17.8	462.036	332.031	322.266
	17.81	458.984	326.538	321.045
	17.82	454.712	325.928	323.486
	17.83	452.881	331.421	327.148
	17.84	456.543	332.642	328.979
	17.85	461.426	333.252	330.2
	17.86	462.646	336.914	332.642
	17.87	459.595	339.355	332.642
	17.88	454.712	342.407	328.979
	17.89	446.777	342.407	326.538
	17.9	441.895	338.745	325.928
	17.91	445.557	335.693	325.928
	17.92	446.167	330.811	325.317
	17.93	449.219	328.369	328.369
	17.94	451.05	328.369	325.317
	17.95	452.27	328.369	319.214
	17.96	452.881	328.369	313.721
	17.97	452.27	332.031	312.5
	17.98	451.66	331.421	310.669
	17.99	449.829	327.759	311.279
	18	449.829	324.707	319.824
	18.01	449.829	321.045	324.707
	18.02	451.66	322.266	325.317
	18.03	450.439	324.097	321.045
	18.04	451.66	326.538	316.772
	18.05	454.102	325.317	316.162
	18.06	455.322	321.655	317.383
	18.07	458.374	317.993	317.993
	18.08	463.257	319.214	317.383
	18.09	461.426	325.317	317.383
	18.1	460.205	325.928	317.383
	18.11	457.153	326.538	313.721
	18.12	451.05	324.707	311.279
	18.13	448.608	324.707	316.162
	18.14	449.219	327.759	323.486
	18.15	449.219	333.252	328.369
	18.16	451.66	340.576	329.59
	18.17	455.933	341.797	330.2
	18.18	459.595	339.966	329.59
	18.19	462.646	339.355	328.369
	18.2	462.646	337.524	324.097
	18.21	463.257	338.745	321.655
	18.22	461.426	335.083	317.383
	18.23	461.426	332.642	314.331
	18.24	464.478	335.083	312.5
	18.25	466.309	337.524	314.941
	18.26	467.529	336.914	319.214
	18.27	466.309	335.693	321.045
	18.28	460.205	334.473	319.214
	18.29	455.933	335.693	317.993
	18.3	453.491	338.745	315.552
	18.31	453.491	336.914	314.331
	18.32	454.712	332.642	312.5
	18.33	458.374	327.759	313.721
	18.34	458.374	329.59	314.941
	18.35	458.374	333.862	317.383
	18.36	454.712	339.355	323.486
	18.37	457.764	341.187	327.759
	18.38	462.646	339.355	326.538
	18.39	462.036	335.693	325.928
	18.4	458.374	331.421	323.486
	18.41	457.764	329.59	321.045
	18.42	453.491	329.59	320.435
	18.43	453.491	327.759	321.045
	18.44	451.05	329.59	322.266
	18.45	448.608	328.369	317.383
	18.46	451.66	324.097	314.941
	18.47	459.595	322.876	312.5
	18.48	462.646	326.538	311.279
	18.49	462.646	328.369	313.11
	18.5	458.374	327.759	317.383
	18.51	453.491	326.538	324.097
	18.52	454.102	322.266	329.59
	18.53	453.491	322.876	327.148
	18.54	454.712	328.979	322.876
	18.55	454.712	333.862	317.993
	18.56	453.491	335.693	314.941
	18.57	450.439	336.914	314.941
	18.58	452.27	333.252	316.772
	18.59	456.543	331.421	321.045
	18.6	463.257	328.979	324.097
	18.61	465.088	325.928	324.097
	18.62	462.036	325.317	322.876
	18.63	455.933	325.928	322.266
	18.64	447.998	327.148	323.486
	18.65	447.388	325.928	325.317
	18.66	449.829	324.707	324.707
	18.67	448.608	324.097	325.317
	18.68	450.439	328.369	327.148
	18.69	455.933	332.031	328.369
	18.7	458.984	331.421	327.759
	18.71	460.205	333.862	324.097
	18.72	456.543	332.642	322.876
	18.73	452.27	330.811	325.317
	18.74	446.167	328.979	328.979
	18.75	438.843	331.421	327.148
	18.76	437.012	333.252	327.148
	18.77	440.674	334.473	323.486
	18.78	443.115	335.083	322.266
	18.79	445.557	335.083	319.824
	18.8	447.998	332.642	316.772
	18.81	449.829	330.2	314.331
	18.82	451.66	328.369	317.383
	18.83	449.829	327.759	319.824
	18.84	444.946	328.979	320.435
	18.85	441.895	329.59	321.655
	18.86	443.726	328.369	323.486
	18.87	450.439	325.928	324.097
	18.88	452.881	331.421	324.707
	18.89	454.102	336.304	325.317
	18.9	452.27	338.135	327.759
	18.91	447.388	337.524	327.759
	18.92	444.336	336.914	327.759
	18.93	442.505	333.252	327.759
	18.94	440.063	330.811	330.2
	18.95	439.453	330.2	329.59
	18.96	446.167	332.642	327.148
	18.97	451.66	335.693	323.486
	18.98	451.66	333.252	324.707
	18.99	449.219	334.473	324.707
	19	444.336	331.421	325.928
	19.01	444.946	331.421	326.538
	19.02	447.388	333.252	326.538
	19.03	449.219	336.914	324.097
	19.04	451.66	337.524	321.655
	19.05	455.933	336.304	322.266
	19.06	457.764	334.473	322.266
	19.07	458.374	331.421	323.486
	19.08	455.322	327.148	325.317
	19.09	452.881	320.435	325.928
	19.1	451.05	321.045	324.707
	19.11	449.219	320.435	322.876
	19.12	447.388	322.876	322.876
	19.13	445.557	324.097	321.045
	19.14	446.167	327.148	319.214
	19.15	446.167	327.759	319.214
	19.16	448.608	330.811	322.876
	19.17	451.05	330.2	323.486
	19.18	449.829	331.421	320.435
	19.19	447.998	332.642	319.214
	19.2	446.167	330.811	320.435
	19.21	445.557	328.979	322.876
	19.22	450.439	333.252	328.369
	19.23	457.153	339.355	328.979
	19.24	460.815	343.018	328.369
	19.25	461.426	339.355	325.928
	19.26	460.815	332.031	319.824
	19.27	457.764	325.928	315.552
	19.28	452.27	319.214	314.941
	19.29	447.998	321.045	313.721
	19.3	443.115	324.097	319.214
	19.31	442.505	332.031	319.214
	19.32	441.284	339.355	320.435
	19.33	443.726	337.524	318.604
	19.34	443.726	331.421	319.824
	19.35	443.726	328.979	322.266
	19.36	447.388	330.2	324.097
	19.37	448.608	328.369	325.317
	19.38	447.388	323.486	319.824
	19.39	446.777	325.928	316.162
	19.4	452.27	328.369	319.824
	19.41	452.27	327.759	319.824
	19.42	455.322	327.148	316.772
	19.43	455.322	331.421	314.331
	19.44	455.933	332.642	311.279
	19.45	454.712	334.473	314.331
	19.46	451.66	333.252	316.772
	19.47	446.777	330.2	319.214
	19.48	444.336	329.59	319.214
	19.49	444.336	332.031	319.824
	19.5	443.726	332.642	321.655
	19.51	446.167	327.759	321.045
	19.52	447.388	326.538	320.435
	19.53	446.167	325.928	319.214
	19.54	447.998	325.317	319.214
	19.55	447.388	325.928	315.552
	19.56	446.167	328.369	316.162
	19.57	446.167	332.031	320.435
	19.58	447.998	330.2	324.097
	19.59	444.946	328.369	323.486
	19.6	443.115	326.538	321.045
	19.61	441.895	327.148	316.772
	19.62	435.181	327.759	310.669
	19.63	428.467	330.811	309.448
	19.64	430.908	330.2	313.11
	19.65	437.012	327.759	316.162
	19.66	442.505	327.148	318.604
	19.67	444.336	324.707	320.435
	19.68	443.726	326.538	317.993
	19.69	441.284	331.421	319.824
	19.7	443.115	332.031	321.045
	19.71	446.167	332.642	325.317
	19.72	446.167	331.421	322.876
	19.73	447.998	330.811	320.435
	19.74	447.998	329.59	317.383
	19.75	444.946	326.538	314.331
	19.76	446.777	321.655	312.5
	19.77	447.388	319.214	313.721
	19.78	446.777	318.604	316.162
	19.79	448.608	319.824	314.941
	19.8	450.439	321.655	315.552
	19.81	450.439	323.486	316.162
	19.82	450.439	325.928	319.214
	19.83	444.336	326.538	322.266
	19.84	444.336	327.148	322.876
	19.85	446.777	330.811	322.876
	19.86	444.946	336.304	319.824
	19.87	443.115	334.473	320.435
	19.88	444.946	325.928	317.993
	19.89	443.115	322.266	316.772
	19.9	444.946	322.266	313.721
	19.91	446.777	327.148	310.059
	19.92	442.505	325.928	309.448
	19.93	445.557	325.317	311.279
	19.94	444.336	326.538	316.162
	19.95	444.336	327.148	323.486
	19.96	443.115	324.097	327.759
[truncated: 118,003 more rows]

## Sheet: Fig 3D
		Current at -50 mV
	Cell ID	control	3 uM XE	1 uM CBD		CBD+XE/XE
	21707030	232.172	165.018	167.08	0.71076	1.01249
	21707050	197.226	198.263	197.102	1.00525	0.994147
	21707060	63.8936	37.0067	38.1122	0.579192	1.02987
	21708008	50.3667	37.4736	39.5637	0.744014	1.05578
	21708055	135.221	119.212	87.0758	0.881608	0.730429
	21715017	105.578	63.6386	59.8948	0.602765	0.941171
	21715026	108.196	72.9646	72.9578	0.674372	0.999907
	21715030	109.476	31.372	16.7072	0.286564	0.532551
	21715033	58.0232	42.2212	25.0283	0.727661	0.59279
	21715038	197.508	113.596	80.0026	0.575144	0.704276
	21715044	91.5482	72.7065	66.3259	0.794188	0.912242
	21715051	52.8139	36.0047	33.5115	0.681729	0.930751
	21715055	104.991	104.167	93.4064	0.992157	0.896697
	21715013	102.698	55.1011	50.363	0.536533	0.914011
	21715027	239.989	238.674	196.503	0.99452	0.823309
					0.719097	0.871362	Mean
					0.71076	0.914011	Median
					0.196897	0.161614	SD
					0.0508386	0.0417287	SEM
					15	15	n
			0.000710772	0.0104958
				paired t-test ( two-tailed)
